# Supplementary material for: An ERG Enhancer–Based Reporter Identifies Leukemia Cells with Elevated Leukemogenic Potential Driven by ERG-USP9X Feed-Forward Regulation
Source: Oxford University Press journal article supplement (doi:10.1158/0008-5472.can-18-3215), 2019-06-07
Supplement: 00085472can183215-sup-210332_3_supp_5529253_prnk9y.xlsx [file 00085472can183215-sup-210332_3_supp_5529253_prnk9y.xlsx]

## Sheet: Sheet1
Supplementary table 1. Primer sequences for the QRT-PCR
Gene Symbol (Gene name)	Real-Time PCR primer
ERG Fwd	GCTGCTCAACCATCTCCTTCC
ERG Rev	AAGGCGGCTACTTGTTGGTC
USP9X Fwd	TCGGAGGGAATGACAACCAG
USP9X Rev	GGAGTTGCCGGGGAATTTTCA
ID2 Fwd	AGTCCCGTGAGGTCCGTTAG
ID2 Rev	AGTCGTTCATGTTGTATAGCAGG
SMAD3 Fwd	CCATCTCCTACTACGAGCTGAA
SMAD3 Rev	CACTGCTGCATTCCTGTTGAC
EZH2 Fwd	AATCAGAGTACATGCGACTGAGA
EZH2 Rev	GCTGTATCCTTCGCTGTTTCC
GAPDH Fwd	ACCCACTCCTCCACCTTTGA
GAPDH Rev	CTGTTGCTGTAGCCAAATTCGT
ALCAM FP	TCCTGCCGTCTGCTCTTCT
ALCAM RP	TTCTGAGGTACGTCAAGTCGG
CD28 FP	CTATTTCCCGGACCTTCTAAGCC
CD28 RP	GCGGGGAGTCATGTTCATGTA
