# Supplementary material for: An ERG Enhancer–Based Reporter Identifies Leukemia Cells with Elevated Leukemogenic Potential Driven by ERG-USP9X Feed-Forward Regulation
Source: Oxford University Press journal article supplement (doi:10.1158/0008-5472.can-18-3215), 2019-06-07
Supplement: 00085472can183215-sup-210332_3_supp_5529255_prnk9y.xlsx [file 00085472can183215-sup-210332_3_supp_5529255_prnk9y.xlsx]

## Sheet: MI17_to_MI22_RMA_pivot.SST-RMA-
GeneSymbol	Probe Set ID	Neg1	Neg2	Neg3	High1	High2	High3	LogFC	p-value
DLGAP5	TC1400009248.hg.1	6.48848	7.42751	7.48724	9.83083	9.47509	9.43241	2.44503	0.00929902
ELF1	TC1300008708.hg.1	3.98521	8.12113	7.48535	8.8747	8.07625	9.58946	2.31624	0.206462
FRMD4A	TC1000009851.hg.1	4.64127	4.35144	3.87452	6.41315	6.35568	6.17942	2.02701	0.00736683
CCL1	TC1700010393.hg.1	5.70266	5.28094	5.28283	7.36848	7.67341	7.28938	2.02161	0.000448816
CKAP2L	TC0200013912.hg.1	6.03657	6.29651	6.58575	8.35629	8.64218	7.93034	2.00333	0.00199789
KRIT1	TC0700011770.hg.1	7.11342	6.82248	7.35103	9.15569	8.9283	9.10518	1.96741	0.00188454
QRSL1	TC0600008991.hg.1	4.37704	3.46932	5.69857	6.71488	6.85538	5.83162	1.95232	0.0756365
CD28	TC0200010523.hg.1	8.42002	8.2768	8.21706	10.2264	9.75656	10.6623	1.91045	0.0145303
CHRDL1	TC0X00010512.hg.1	4.91041	4.8008	5.15321	6.45745	6.82239	7.25972	1.89172	0.0065289
EPRS	TC0100017365.hg.1	6.59354	6.97259	6.62417	8.40791	8.27559	9.12273	1.87198	0.00909914
TOP2A	TC1700010618.hg.1	8.58757	8.51365	9.03514	10.6711	10.6454	10.4324	1.87086	0.00244737
MGAT4A	TC0200013595.hg.1	10.0694	10.5376	10.4871	12.0361	12.2582	12.4119	1.87068	0.000806386
PNPLA8	TC0700013605.hg.1	4.81597	5.01019	4.68985	6.75913	6.61197	6.75643	1.8705	0.000376268
ALCAM	TC0300008242.hg.1	4.46225	4.1676	4.66099	6.33014	6.26254	6.29825	1.8667	0.00516735
FNBP1L	TC0100009064.hg.1	4.51056	6.59385	5.67333	7.53068	7.3227	7.49531	1.85699	0.0895466
FBXO43	TC0800011243.hg.1	5.60603	5.77581	4.67398	6.97099	7.19381	7.29303	1.80067	0.0271959
CEP55	TC1000008482.hg.1	4.84813	5.46992	6.34732	7.20049	7.27645	7.54501	1.78552	0.0477943
GPCPD1	TC2000008295.hg.1	3.19463	3.62546	3.99957	5.01882	5.26409	5.88941	1.78422	0.00708492
CLSPN	TC0100013700.hg.1	6.01391	5.42145	6.47757	7.64147	7.95333	7.55378	1.74522	0.0183429
SHPRH	TC0600013464.hg.1	4.53591	5.5144	5.40627	7.36319	6.48828	6.82889	1.74126	0.0132487
KIF11	TC1000008471.hg.1	7.59626	6.54417	7.2021	8.49046	9.29773	8.76119	1.73562	0.0126871
RLIM	TC0X00010097.hg.1	6.67891	7.08388	7.21216	9.01054	8.80006	8.34457	1.72674	0.00280546
ADTRP	TC0600010825.hg.1	4.37271	4.8164	3.90708	6.47246	5.69204	6.04222	1.70351	0.00839046
PIK3R1	TC0500007641.hg.1	4.79836	6.22666	5.9042	7.00904	7.65078	7.37211	1.7009	0.0428512
CWC22	TC0200015099.hg.1	4.54709	5.36754	6.34452	7.36618	6.98423	6.98404	1.69177	0.0752108
CD96	TC0300008320.hg.1	8.87305	9.08817	9.58168	10.6809	11.0636	10.8676	1.68973	0.00549779
SMC3	TC1000008896.hg.1	7.39221	6.92738	8.03486	8.88234	9.29372	9.2313	1.6843	0.0224577
RAD50	TC0500008641.hg.1	6.60218	6.65566	7.27138	8.98552	8.31091	8.27393	1.68038	0.00607951
NKTR	TC0300007165.hg.1	8.8458	8.26336	8.82932	10.2677	10.2882	10.3457	1.65436	0.0121777
TMEM167A	TC0500011334.hg.1	2.04291	5.7879	4.65768	6.80898	4.71703	5.8886	1.64204	0.282077
CKAP2	TC1300007248.hg.1	6.13168	6.32168	6.78002	7.76299	8.5048	7.8672	1.63387	0.00616846
ANKRD20A1	TC0900010284.hg.1	7.05597	6.57082	7.58167	8.71576	8.95018	8.42558	1.62769	0.0157501
KIF4A	TC0X00007537.hg.1	6.72071	6.37386	7.01423	7.94539	8.58426	8.41625	1.61237	0.0037582
KIAA1109	TC0400008609.hg.1	4.26648	4.40754	3.5225	5.98731	4.73608	6.30588	1.61092	0.0572652
TUBGCP3	TC1300009858.hg.1	3.5916	5.75327	5.03402	6.85771	5.31699	7.02684	1.60755	0.128726
ANLN	TC0700007198.hg.1	8.3032	7.43616	7.92115	9.26958	9.70142	9.49886	1.60311	0.0112756
KIF14	TC0100016891.hg.1	5.77054	4.92234	5.34335	7.43873	6.6694	6.72905	1.60032	0.0100304
MCM8	TC2000006628.hg.1	11.1873	10.4476	10.4347	12.1549	12.3941	12.3182	1.59921	0.0173355
LUC7L3	TC1700012283.hg.1	9.42454	10.0986	9.75533	11.1027	11.6645	11.2762	1.58834	0.00371119
LNPEP	TC0500011523.hg.1	3.56964	3.86876	3.06739	4.84735	5.49378	4.89825	1.57786	0.00751698
PHF3	TC0600014143.hg.1	8.39042	5.85848	7.26122	8.84367	8.81817	8.56573	1.57248	0.163068
BLZF1	TC0100010546.hg.1	4.70712	5.92642	6.31626	7.13805	7.76581	6.76222	1.57209	0.0623658
AHR	TC0700006795.hg.1	6.15978	5.42816	5.97338	7.80015	7.17761	7.29198	1.56947	0.0060391
DDX26B	TC0X00008514.hg.1	6.00755	5.33834	5.40305	7.07411	7.28046	7.07803	1.56122	0.0119436
ZNF326	TC0100008996.hg.1	6.78538	7.87549	7.80584	8.74299	9.05622	9.34325	1.55859	0.0301375
CHD9	TC1600007874.hg.1	4.30596	5.65277	5.24846	6.62818	6.82257	6.42441	1.55599	0.0505938
HMGN5	TC0X00010172.hg.1	5.31571	5.62718	5.37866	6.66764	7.55182	6.76232	1.55341	0.0218632
LMBRD2	TC0500010493.hg.1	5.65875	5.26747	5.62342	6.99099	6.58833	7.59075	1.54014	0.0209306
DEPDC1	TC0100014543.hg.1	6.81397	6.47776	6.1814	7.65451	8.07623	8.3406	1.53273	0.00491473
PLK4	TC0400008664.hg.1	6.03686	6.31012	6.4356	7.85542	7.64371	7.85548	1.52401	0.00104046
DCLRE1A	TC1000011885.hg.1	5.39238	5.70824	6.00496	7.23144	7.17756	7.26776	1.52373	0.0118293
ESCO2	TC0800007119.hg.1	7.56464	6.69148	7.22181	8.46299	8.93051	8.65043	1.522	0.0125974
DDX21	TC1000007876.hg.1	8.54557	9.26775	9.00998	10.4701	10.3159	10.6	1.52091	0.0105567
ARHGAP11B	TC1500006785.hg.1	9.71221	9.21758	9.65628	11.1851	11.0211	10.9322	1.51743	0.00377828
SRP72	TC0400007593.hg.1	9.3562	9.13041	9.07365	10.681	10.813	10.6148	1.51619	0.000290249
KIAA0586	TC1400007310.hg.1	6.66585	6.98912	7.32884	8.49891	8.4061	8.62377	1.51499	0.00973744
USPL1	TC1300006767.hg.1	4.6673	5.35885	5.01327	6.62004	6.47533	6.47881	1.51159	0.0132333
MBNL1	TC0300009202.hg.1	11.0315	11.2202	11.0718	12.5922	12.627	12.6355	1.51043	0.000880171
DBF4	TC0700008263.hg.1	7.10687	7.03943	7.03224	8.86483	8.59666	8.23779	1.50692	0.0130768
ABCE1	TC0400008902.hg.1	9.3205	8.43195	8.92812	9.87819	10.8425	10.4443	1.49481	0.0172773
ZGRF1	TC0400011620.hg.1	5.32786	4.29581	5.32155	6.06287	6.75643	6.59644	1.49017	0.0288086
TIGAR	TC1200006557.hg.1	5.40981	4.42472	6.16102	6.76389	6.81352	6.88774	1.48986	0.0967501
OCRL	TC0X00008383.hg.1	3.73339	3.98575	4.01372	5.78526	4.48833	5.91972	1.48682	0.0776222
PRKDC	TC0800010360.hg.1	10.3536	10.1094	10.3053	11.5795	12.0031	11.5865	1.46698	0.0025011
ARID4A	TC1400007307.hg.1	5.35182	5.34047	5.27037	6.31386	7.46263	6.58247	1.46543	0.0510312
NDC80	TC1800006484.hg.1	8.41507	8.66554	8.82536	10.1191	9.91221	10.2697	1.46499	0.000827171
ARID5B	TC1000007761.hg.1	11.6945	11.381	11.6146	12.7842	13.239	13.0589	1.46399	0.00132522
GNL2	TC0100013748.hg.1	6.8663	6.11011	6.74413	7.85206	7.97915	8.28032	1.46366	0.0110778
SECISBP2L	TC1500009358.hg.1	6.62599	7.04075	7.56652	8.92658	8.39545	8.29012	1.45963	0.0149501
PUS7L	TC1200012787.hg.1	4.10668	4.48706	5.72312	6.18658	6.5132	5.98852	1.45715	0.0850113
CCSER2	TC1000008276.hg.1	7.88793	8.35631	8.07006	9.79612	9.26427	9.62061	1.45557	0.00233106
RPS6KA3	TC0X00009218.hg.1	5.78853	7.34148	7.55701	8.52113	8.30601	8.2264	1.45551	0.117188
TNFSF8	TC0900011302.hg.1	5.23525	4.58215	5.45019	6.65938	5.916	7.0552	1.45433	0.0289769
RTTN	TC1800008978.hg.1	5.86572	5.90855	5.69983	7.21535	7.32545	7.28688	1.45119	0.000280687
MTRNR2L9	TC0600008379.hg.1	8.87722	9.98615	10.3105	10.9148	11.2677	11.3422	1.45026	0.0684045
CDCA2	TC0800007065.hg.1	6.76688	6.46931	5.95401	7.66118	7.92323	7.94719	1.44713	0.0159872
C16orf72	TC1600009331.hg.1	5.30847	4.45933	4.36087	5.5782	7.23195	5.65211	1.44453	0.0975599
MTMR6	TC1300008386.hg.1	8.71505	8.44931	8.95436	9.92199	10.1948	10.3338	1.44394	0.00182135
HLTF	TC0300012764.hg.1	6.34632	6.27851	6.3768	7.95259	7.53466	7.84293	1.44285	0.00537978
TMOD2	TC1500007238.hg.1	4.28127	4.93827	5.63499	6.08373	6.45422	6.6445	1.44264	0.050008
MPHOSPH9	TC1200012263.hg.1	5.46652	5.60952	7.03752	7.08742	7.20209	8.1478	1.44125	0.0847334
TSNAX	TC0100017733.hg.1	5.16681	3.46657	3.44643	5.1164	6.73826	4.53264	1.43583	0.176482
CDK6	TC0700011785.hg.1	8.8692	8.51024	8.64681	10.1439	10.1681	10.0181	1.43461	0.00162809
CEP85L	TC0600013001.hg.1	5.99805	5.21808	5.57341	6.51426	7.55832	7.01458	1.43254	0.0218858
ERCC4	TC1600006976.hg.1	8.42047	6.74995	8.18323	8.97446	9.4901	9.17848	1.42979	0.101741
TOP2B	TC0300010540.hg.1	7.81328	7.73327	7.67706	9.07333	9.11249	9.30884	1.42368	0.00036594
KIF15	TSUnmapped00000627.hg.1	8.27518	7.2357	8.03567	9.41157	9.42727	8.97629	1.42286	0.0291253
KIAA1429	TC0800011139.hg.1	6.28463	6.43903	7.04729	7.95765	7.8511	8.22786	1.42188	0.0131313
2007-03-01	TC0200009789.hg.1	9.38904	8.31237	9.0338	10.2156	10.3286	10.4272	1.41204	0.0424723
SSB	TC0200009920.hg.1	11.1529	12.1029	11.5685	13.0219	13.0425	12.99	1.41004	0.0356267
TTC30B	TC0200015071.hg.1	5.42462	4.79635	5.13748	7.04387	6.28187	6.22298	1.39676	0.0157627
GIMAP4	TC0700009677.hg.1	4.64928	4.27897	3.90825	5.88309	5.83983	5.30053	1.39565	0.00835908
LRRCC1	TC0800008120.hg.1	5.22122	4.56371	5.05412	5.8297	6.82889	6.36688	1.39547	0.0206854
WRN	TC0800007209.hg.1	5.63931	4.84834	5.96478	6.78052	7.16852	6.68278	1.39313	0.0359166
MNS1	TC1500009522.hg.1	6.60161	6.52004	5.74358	7.13909	7.48592	8.41947	1.39308	0.0468908
EXOC6	TC1000008475.hg.1	3.85157	4.13869	4.68365	5.74466	5.33803	5.76803	1.39227	0.0137219
DAAM1	TC1400007328.hg.1	4.71916	3.91505	5.10125	5.88482	5.82009	6.20524	1.39156	0.0458134
HIRIP3	TC1600009947.hg.1	5.46185	6.44722	6.53453	7.45469	7.56966	7.59199	1.39092	0.0540536
BCLAF1	TC0600013272.hg.1	6.79405	5.89597	6.00154	7.5455	7.55887	7.75891	1.39058	0.0330391
TDRD7	TC0900008148.hg.1	5.32098	4.32947	5.45671	5.67791	6.40297	7.18017	1.38463	0.0714207
CCDC144A	TC1700012200.hg.1	3.79752	3.40641	4.49012	5.84912	4.68134	5.31027	1.38223	0.0406958
GNPTAB	TC1200011711.hg.1	6.9779	7.47457	7.56117	8.80702	8.93633	8.40975	1.37982	0.00487768
HEATR1	TC0100017860.hg.1	8.72546	8.09992	8.48277	9.95628	9.65293	9.82776	1.37627	0.00734162
FAM91A1	TC0800008758.hg.1	6.2661	4.92176	6.73208	6.90929	7.36091	7.77239	1.37422	0.110898
PIBF1	TC1300007484.hg.1	4.40013	4.15709	4.61925	6.12658	5.72276	5.43701	1.36996	0.00704236
IQGAP1	TC1500008312.hg.1	9.06795	8.8176	8.85496	10.1821	10.48	10.1812	1.36757	0.000552394
PSMA8	TC1800006935.hg.1	4.68177	4.32271	5.58911	5.80073	6.85129	6.03169	1.36337	0.0522811
BMS1	TC1000007396.hg.1	5.8712	6.60996	6.39469	7.94122	7.4568	7.56704	1.36307	0.00959054
LAX1	TC0100011270.hg.1	8.41893	8.22827	8.35483	9.58761	9.54261	9.95042	1.35953	0.00346135
PTPN2	TC1800008129.hg.1	5.25126	5.31515	4.5495	6.00563	7.17531	6.00736	1.35746	0.0520093
KIF18A	TC1100010418.hg.1	5.40257	5.04562	5.49482	7.28569	6.09494	6.62388	1.35384	0.0443273
ZNF91	TC1900011926.hg.1	6.86711	5.66036	6.668	7.38675	8.07826	7.76995	1.3465	0.0488227
ARHGEF6	TC0X00010933.hg.1	9.7774	9.86475	9.57118	10.9543	11.0961	11.2	1.3457	0.000346918
USP24	TC0100014284.hg.1	6.03585	5.63146	6.792	7.80063	6.8193	7.87642	1.34568	0.048994
GPSM2	TC0100009333.hg.1	4.95525	5.97815	5.74605	7.00413	6.84927	6.85721	1.34372	0.0459856
HSPH1	TC1300008533.hg.1	8.61961	8.19329	8.92906	9.87332	9.90005	9.99036	1.34059	0.021948
XRN1	TC0300012665.hg.1	6.22797	5.51848	6.48569	7.46261	7.68029	7.10904	1.33994	0.0246339
SEL1L	TC1400009842.hg.1	8.7591	9.29928	9.37654	10.5088	10.6369	10.3045	1.33842	0.00913895
CEP128	TC1400009829.hg.1	7.00361	7.2066	7.29767	8.56254	8.54973	8.40145	1.33528	0.000611715
BLOC1S5	TC0600014238.hg.1	7.65127	7.46563	8.15328	8.6613	9.68086	8.93047	1.33415	0.027815
GCC2	TC0200013805.hg.1	3.76229	3.95354	3.7407	5.50542	4.8197	5.11997	1.32952	0.0140291
KPNA3	TC1300008926.hg.1	5.80358	4.87435	5.51095	7.07645	6.60021	6.49675	1.32817	0.0207675
RFC1	TC0400010459.hg.1	6.32766	6.39462	7.23748	7.68941	8.6043	7.63194	1.32196	0.0374039
RANBP2	TC0200008807.hg.1	5.79615	6.42926	6.88077	7.74057	7.86691	7.4642	1.32184	0.0389165
KIF16B	TC2000008473.hg.1	4.74101	5.51199	5.34234	6.45618	6.68064	6.41869	1.32006	0.020578
RALGAPA1	TC1400008945.hg.1	6.95595	7.22078	7.80873	8.32647	8.57627	9.04002	1.3191	0.0168334
KIF23	TC1500007699.hg.1	9.03775	8.4293	8.38739	10.1354	9.81043	9.86419	1.31852	0.0122939
KAT6B	TC1000008081.hg.1	6.39762	4.86517	5.37124	6.97753	6.6021	7.00343	1.31634	0.090195
DSG2	TC1800007014.hg.1	6.07807	6.51525	6.88166	7.28519	8.12176	8.01615	1.31604	0.0204925
ZDHHC3	TSUnmapped00000491.hg.1	3.80535	3.54283	4.11259	5.03055	5.1652	5.21009	1.31502	0.00957715
PPP4R3B	TC0200012648.hg.1	7.5507	7.89513	7.88578	8.94788	8.96768	9.35939	1.31444	0.00189096
POTEI	TC0200014269.hg.1	6.63197	5.79912	6.14582	7.4162	7.27876	7.82358	1.31388	0.0144589
PAPOLA	TC1400008119.hg.1	11.8123	11.7562	11.8051	12.9148	13.3332	13.0615	1.31194	0.00763287
BUB1	TC0200013878.hg.1	10.314	10.0478	10.1884	11.3555	11.6995	11.4274	1.3107	0.000831145
DOCK11	TC0X00008228.hg.1	6.71988	7.05061	6.41005	8.12003	7.81086	8.18048	1.31028	0.00671855
TPO	TC0200006480.hg.1	4.36055	5.55454	4.56645	5.82585	6.80015	5.78518	1.30988	0.0581228
USP1	TC0100008554.hg.1	9.23587	8.7541	9.3681	10.2209	10.7429	10.3227	1.3095	0.00636498
ARHGAP5	TC1400006851.hg.1	4.96393	5.48928	5.90504	6.49152	7.21509	6.57445	1.3076	0.0223692
SAMSN1	TC2100007599.hg.1	4.80924	3.58464	3.44708	5.16073	5.33385	5.26891	1.30751	0.0924397
USP34	TC0200007722.hg.1	3.25376	3.61114	2.65142	4.30712	4.23669	4.89101	1.30617	0.0231176
PARP14	TC0300008561.hg.1	6.74859	6.83846	6.4092	7.97461	7.94933	7.98664	1.30478	0.00950033
ANKRD36B	TC0200013567.hg.1	9.61494	9.32199	9.90094	10.9266	10.8364	10.9844	1.30319	0.0119347
CRNKL1	TC2000008573.hg.1	5.61736	4.41872	5.29102	5.92134	6.74898	6.56294	1.30206	0.0468146
XAF1	TC1700006709.hg.1	6.77684	6.96973	7.41407	8.00174	8.69761	8.36308	1.3006	0.00926904
PPM1B	TC0200012429.hg.1	4.0333	3.40084	2.65709	4.57544	3.5535	5.85511	1.2976	0.18542
MYOM2	TC0800006496.hg.1	3.46639	3.88246	3.63394	5.05032	4.8442	4.97173	1.29449	0.00264661
NCAPG	TC0400006994.hg.1	8.43184	8.46795	8.65037	9.77931	9.80823	9.84236	1.29324	0.00153682
CDK1	TC1000007748.hg.1	8.62042	9.09429	9.94778	10.4819	10.6067	10.4529	1.29301	0.0775148
ERAP2	TC0500008156.hg.1	8.10829	8.02135	8.10392	9.31702	9.21032	9.56899	1.28759	0.00438169
GTF3C3	TC0200015329.hg.1	6.69419	6.52672	6.97296	7.95179	8.26997	7.82885	1.28558	0.00225218
TRIM38	TC0600007257.hg.1	7.19755	6.71305	7.42837	8.63189	8.18974	8.36892	1.28386	0.010809
UBR1	TC1500009204.hg.1	10.2761	10.7047	10.4439	11.385	11.9795	11.9093	1.28305	0.00708732
HIPK1	TC0100009482.hg.1	5.03156	4.07127	5.0172	5.27345	6.75511	5.93667	1.28173	0.0795596
SREK1	TC0500007617.hg.1	5.75161	6.31349	6.16143	7.14234	7.54281	7.37653	1.27839	0.00485351
KLHL36	TC1600008656.hg.1	5.01631	5.39222	5.58975	6.8549	6.74654	6.23139	1.27818	0.00782856
NUF2	TC0100010397.hg.1	6.87684	6.99971	7.71063	8.50528	8.38843	8.51323	1.27325	0.0365159
TRPM7	TC1500009395.hg.1	5.10321	4.23217	4.12947	5.95382	4.95262	6.37418	1.27192	0.0774995
IFT81	TC1200008820.hg.1	2.36807	3.77373	3.89658	4.48589	4.73917	4.62713	1.27127	0.119074
RB1	TC1300007137.hg.1	11.5199	11.5029	11.7193	12.7836	13.0554	12.7135	1.2701	0.00104663
PRKACB	TC0100008874.hg.1	7.83187	7.34658	7.473	8.71806	9.12403	8.61731	1.26932	0.00399012
REST	TC0400007609.hg.1	7.81833	8.04064	8.05048	9.39861	9.22749	9.08434	1.267	0.000508134
HS2ST1	TC0100018242.hg.1	7.98203	8.65986	9.10306	9.44257	10.2108	9.8887	1.26569	0.0390104
KIAA2026	TC0900012202.hg.1	4.02467	4.74892	4.16128	5.54201	5.52518	5.6592	1.26384	0.0260989
ERBB2IP	TC0500007610.hg.1	6.97548	7.37453	5.8175	8.10379	7.82365	8.03067	1.26353	0.109421
INTS7	TC0100017229.hg.1	6.35694	6.07637	7.25448	8.29527	7.67514	7.50703	1.26322	0.0495281
SLF2	TC1000008661.hg.1	4.60893	4.91387	5.41718	5.89125	6.56646	6.27064	1.26279	0.0155927
ANKRD36	TC0200008534.hg.1	10.3168	9.69583	9.86803	11.1599	11.4435	11.0631	1.26192	0.00759202
KIF15	TSUnmapped00000255.hg.1	4.98467	4.63353	5.24327	6.56216	6.03197	6.04732	1.26	0.00709601
MTRNR2L3	TC2000009588.hg.1	5.33733	5.11366	5.7336	6.19283	7.02734	6.7398	1.25846	0.0170958
DOCK2	TC0500012781.hg.1	6.14149	5.30443	6.04619	7.40238	7.2522	6.60968	1.25739	0.0251955
TTF1	TC0900011805.hg.1	4.64399	6.02959	5.36427	6.78774	7.01398	6.00821	1.25736	0.0711504
LRRC37A4P	TC1700012423.hg.1	6.0275	5.58206	6.83971	7.34947	7.03417	7.83627	1.25688	0.0548242
GPR21	TC0900008684.hg.1	7.06319	7.11601	7.92078	8.42412	8.78751	8.65552	1.25572	0.0326301
MKI67	TC1000012235.hg.1	9.65699	9.00469	9.30195	10.5401	10.4809	10.7086	1.25534	0.0135914
TWISTNB	TC0700010396.hg.1	5.49952	5.0167	5.56083	6.6825	6.52975	6.62838	1.25453	0.013771
CAND1	TC1200012657.hg.1	6.23181	7.66998	7.35636	8.02341	8.95254	8.04375	1.25385	0.0860021
KMT5B	TC1100011374.hg.1	8.81642	7.81148	8.76201	9.7819	9.55432	9.80207	1.24946	0.0548135
CCP110	TC1600007112.hg.1	5.173	5.078	5.68432	6.97761	6.06603	6.63748	1.24861	0.022546
DGKH	TC1300006987.hg.1	5.33208	6.44282	5.64257	6.97075	7.26722	6.90355	1.24135	0.0522137
EXTL2	TC0100015079.hg.1	5.56535	4.74888	5.82763	6.2704	6.91817	6.66375	1.23682	0.0416601
LYSMD3	TC0500011435.hg.1	7.76226	7.341	7.92234	8.29664	9.31758	9.12001	1.23621	0.0382203
DTNA	TC1800007059.hg.1	3.09449	4.24429	3.74282	4.68663	5.0053	5.09587	1.2354	0.0516351
SGOL1	TC0300010476.hg.1	8.74955	8.66915	8.7339	9.53844	10.2686	10.0498	1.23475	0.0280428
CCDC14	TC0300012216.hg.1	9.16017	9.05093	9.43954	10.6205	10.33	10.3998	1.23325	0.00143175
ZNF121	TC1900009588.hg.1	9.11921	8.77366	9.40818	10.3544	10.3499	10.2958	1.23298	0.0205054
LRPPRC	TC0200012418.hg.1	8.81361	9.02274	8.62521	10.2359	10.1861	9.73489	1.23176	0.00451439
CEBPZ	TC0200012260.hg.1	5.16123	5.47952	5.93989	6.73516	7.24499	6.29521	1.23157	0.0272481
MAP3K2	TC0200014170.hg.1	8.19029	7.12114	7.7871	8.98251	8.63587	9.17289	1.23091	0.0396893
CENPE	TC0400011477.hg.1	6.52386	6.08312	5.96397	6.9261	7.78718	7.54062	1.22765	0.0212709
TPP2	TC1300007884.hg.1	8.52421	8.84797	8.7616	10.2483	9.91739	9.65037	1.22741	0.00739771
MCM10	TC1000006819.hg.1	4.92579	4.72419	4.47619	5.87263	6.04551	5.88802	1.22666	0.00477447
DST	TC0600012123.hg.1	3.69866	4.43239	4.23895	5.88275	5.01878	5.14562	1.22572	0.0259331
FAM111A	TC1100007728.hg.1	11.1362	10.6719	10.5459	12.0051	12.076	11.9437	1.22358	0.0173446
TAB3	TC0X00009339.hg.1	8.72204	7.77558	8.38091	9.63078	9.42675	9.49082	1.22328	0.042152
HELLS	TC1000012477.hg.1	9.67856	9.47548	9.65835	10.7762	10.9175	10.7853	1.2222	0.000202181
MIOS	TC0700006669.hg.1	5.32668	6.2059	6.21186	7.12388	7.386	6.89519	1.22021	0.0357579
SLC4A4	TC0400007799.hg.1	5.68612	5.20918	6.47703	7.15184	7.18563	6.69457	1.2199	0.0640227
MTIF2	TC0200012642.hg.1	7.1928	7.05935	7.45053	8.56579	8.62195	8.17431	1.21979	0.0029489
DNAJC2	TC0700012122.hg.1	7.45328	6.5065	8.12406	8.67083	8.76375	8.30537	1.2187	0.111778
PARP4	TC1300008359.hg.1	7.70988	7.43845	7.98015	8.85463	8.94949	8.97456	1.21673	0.0126087
MIA3	TC0100011692.hg.1	7.26666	7.61301	6.9725	8.6129	8.17476	8.71272	1.21606	0.00830175
ERCC6L2	TC0900008091.hg.1	4.14547	4.19556	4.18214	5.02951	5.50688	5.63236	1.2152	0.021491
ZNF302	TC1900007819.hg.1	6.47252	5.9432	7.53259	7.86614	7.92041	7.80213	1.21346	0.121018
TTK	TC0600008630.hg.1	9.18769	8.51065	8.90161	9.60379	10.6229	10.0135	1.21339	0.0335035
TGS1	TC0800007681.hg.1	8.36146	8.38809	7.95843	9.37524	9.2631	9.7095	1.21329	0.00329226
SLC39A10	TC0200010328.hg.1	6.36807	6.50847	6.97737	7.82378	7.81805	7.84826	1.21206	0.0220983
THUMPD1	TC1600009666.hg.1	6.34477	7.26287	7.09858	8.15728	8.36322	7.81897	1.21108	0.0308015
LIN9	TC0100017523.hg.1	6.29274	6.81351	7.10637	8.12325	8.13395	7.58449	1.20969	0.0178065
SENP6	TC0600008562.hg.1	8.46985	8.61429	9.07426	9.93356	10.1958	9.6581	1.20967	0.00770574
SMARCA1	TC0X00010785.hg.1	5.22359	5.68963	4.75261	6.11581	6.66196	6.50969	1.20721	0.0268662
CDK5RAP2	TC0900011378.hg.1	4.39762	4.6795	5.19622	6.22626	5.83506	5.82682	1.20493	0.0185262
UFL1	TC0600008873.hg.1	6.34063	5.88066	6.54696	7.06008	8.02187	7.29985	1.20452	0.0319554
RUFY3	TC0400007789.hg.1	5.82974	6.61158	6.61317	7.25733	7.66955	7.73643	1.20294	0.0249923
EXOC1	TC0400007572.hg.1	6.8372	7.15655	6.95784	8.24954	8.33905	7.97157	1.20286	0.00129125
RASA3	TC1300009933.hg.1	8.77111	9.38048	9.27699	10.3059	10.6298	10.0988	1.202	0.00863019
SEC63	TC0600012764.hg.1	8.55666	8.58237	9.12529	10.1638	9.88267	9.82278	1.20164	0.0095419
CPD	TC1700007451.hg.1	5.80841	4.52555	5.47846	6.32096	6.46377	6.62681	1.19971	0.0824456
ZBTB41	TC0100016833.hg.1	4.23853	3.77329	4.35283	5.08265	5.61359	5.26559	1.19906	0.00738408
SLC38A2	TC1200010518.hg.1	11.9983	11.6523	12.1615	12.8732	13.3028	13.2285	1.19749	0.00412583
ANKRD36C	TC0200016710.hg.1	10.9865	11.113	10.9952	12.3135	12.1354	12.2359	1.19671	7.74152e-05
TRMT5	TC1400009355.hg.1	6.61695	6.82257	6.68285	8.01192	8.14028	7.55391	1.19458	0.0139689
ATG2B	TC1400010100.hg.1	4.36417	3.63938	5.00539	5.29777	5.47133	5.8164	1.19219	0.0794083
TCF12	TC1500007333.hg.1	11.9904	12.0227	12.1475	13.1915	13.1888	13.3469	1.18881	7.81322e-05
FAM160B1	TC1000008984.hg.1	8.80671	8.90287	8.84625	9.89627	10.0671	10.156	1.18783	0.0016488
ZFX	TC0X00006809.hg.1	6.83369	6.60022	6.49682	7.87131	8.13364	7.48124	1.18515	0.0113515
EIF3A	TC1000011988.hg.1	9.68236	10.3332	9.76404	10.7078	11.3173	11.3096	1.18507	0.0145956
EIF2AK2	TC0200012257.hg.1	8.26842	8.19465	8.78131	9.6004	9.34398	9.85394	1.18465	0.00837824
SP3	TC0200014971.hg.1	11.4046	11.4568	11.2975	12.4794	12.6996	12.5309	1.18367	0.000253144
ARHGAP12	TC1000010239.hg.1	6.07516	5.18869	5.95672	6.98433	6.87299	6.91266	1.18314	0.0492229
STAU2	TC0800012427.hg.1	10.3217	10.5443	10.5538	11.6831	11.7279	11.5575	1.18286	0.000442072
AHI1	TC0600013258.hg.1	4.58645	3.79674	4.37303	5.73976	5.24085	5.32354	1.18265	0.0186924
ZNF92	TC0700007807.hg.1	8.21713	7.76054	8.2616	9.09503	9.48481	9.20695	1.1825	0.00525597
FAM63B	TC1500007379.hg.1	5.65961	5.74623	6.33101	7.24227	6.87553	7.16484	1.18193	0.015307
SSFA2	TC0200010164.hg.1	4.1581	4.53405	4.61022	5.40777	5.64966	5.78007	1.17838	0.00325092
VPS35	TC1600010171.hg.1	7.82702	7.2949	7.40588	8.3802	8.94565	8.7317	1.17658	0.00703782
ARHGAP11B	TC1500010707.hg.1	10.224	9.50641	9.40431	11.0036	10.7185	10.9374	1.17492	0.0343327
CLINT1	TC0500012611.hg.1	9.34562	9.35842	9.52043	10.6368	10.6832	10.4257	1.17375	0.000477609
ATAD2B	TC0200011965.hg.1	5.30901	4.56234	4.99685	5.97043	6.16448	6.25275	1.17315	0.0212608
LATS1	TC0600013528.hg.1	10.3129	10.4358	10.5433	11.5005	11.5355	11.7713	1.17178	0.000549368
MOSPD2	TC0X00006671.hg.1	5.64915	5.31902	4.67924	5.97207	6.81911	6.36939	1.17105	0.0366418
GPR52	TC0100010674.hg.1	3.74507	4.71621	4.08783	5.10872	5.16718	5.77477	1.16719	0.0339523
WAPL	TC1000011299.hg.1	7.34925	7.23143	7.30643	8.53312	8.79948	8.05469	1.16672	0.0305498
MFN1	TC0300009602.hg.1	7.3061	6.34972	7.07065	8.16701	8.32546	7.72102	1.16234	0.0350226
NUCB2	TC1100012976.hg.1	13.5207	13.3094	13.6564	14.4458	14.8707	14.6556	1.16188	0.00213889
RSBN1L	TC0700008147.hg.1	9.18736	9.09211	8.86184	10.3459	10.0495	10.2293	1.16113	0.000907813
ATAD2	TC0800011679.hg.1	8.59123	8.22002	7.68773	9.27681	9.34262	9.36165	1.1607	0.0462201
ELF1	TC1300008706.hg.1	2.87626	3.70319	4.50584	4.77524	5.18967	4.60124	1.16029	0.119607
PAIP2	TC0500012203.hg.1	6.30441	5.46073	7.16998	7.16994	8.64086	6.6041	1.15993	0.215147
AGPS	TC0200010100.hg.1	8.93671	9.21851	8.9314	10.0573	10.3185	10.1898	1.15963	0.00084381
ZNF708	TC1900011919.hg.1	7.88754	6.97673	7.58032	8.27096	9.02466	8.62563	1.15889	0.0301112
PI15	TC0800007993.hg.1	4.63908	3.5507	5.08807	5.5727	5.83729	5.33687	1.15634	0.116102
STRN	TC0200012252.hg.1	8.92196	9.03771	9.12959	10.3135	10.1944	10.0476	1.15542	0.000399549
MCM9	TC0600013004.hg.1	7.82597	8.1783	8.2828	9.31482	9.24663	9.18745	1.15394	0.0100632
ZNF546	TSUnmapped00000196.hg.1	4.31653	2.95779	3.97851	5.60798	4.82816	4.27749	1.1536	0.109551
CDC7	TC0100009020.hg.1	7.19611	7.30195	7.9788	8.45803	8.58106	8.89609	1.15277	0.0246305
DOCK9	TC1300009583.hg.1	5.25804	5.70933	5.47691	6.53081	6.9322	6.43836	1.15237	0.00480814
HOOK3	TC0800012299.hg.1	7.28589	6.56074	8.10792	8.86069	7.992	8.55774	1.15196	0.106107
SAMD9	TC0700011796.hg.1	3.99685	3.86771	4.36673	5.46012	5.21329	5.01227	1.15146	0.00461716
ZMYM2	TC1300006481.hg.1	6.32552	7.58149	6.99368	8.05048	8.42693	7.87638	1.15103	0.0690253
MIS18BP1	TC1400009066.hg.1	5.40333	4.96887	6.3383	6.88127	6.33866	6.94304	1.15082	0.0863772
NUSAP1	TC1500006999.hg.1	10.826	10.9965	11.0257	12.1805	12.3216	11.7883	1.14739	0.0105289
SCRN3	TC0200010009.hg.1	7.89727	7.49531	7.76777	8.98142	8.81154	8.80727	1.14663	0.00367789
TMPO	TC1200008568.hg.1	12.267	12.019	12.7998	13.4635	13.4564	13.6017	1.14527	0.0336765
DCUN1D1	TC0300013330.hg.1	6.12001	6.6631	6.86851	7.60361	7.89139	7.59082	1.14473	0.0222398
LRRFIP1	TC0200016603.hg.1	7.08991	7.46063	7.61442	8.70329	8.78373	8.10644	1.14283	0.0150718
ARHGAP18	TC0600013147.hg.1	5.02129	3.25454	4.18465	4.80407	5.69732	5.38486	1.14192	0.140991
ZNF521	TC1800008317.hg.1	3.9246	4.23148	4.84399	5.56552	5.34398	5.5136	1.14101	0.0448289
LIMA1	TC1200010655.hg.1	8.26339	8.18097	8.57828	9.4687	9.70219	9.27472	1.14099	0.00274167
SUZ12	TC1700007498.hg.1	8.98035	8.0633	8.92618	9.97936	9.81574	9.59585	1.14038	0.047891
PSME4	TC0200012608.hg.1	7.13038	7.46404	7.13251	8.43366	8.30263	8.40868	1.13935	0.00471744
WWP1	TC0800008146.hg.1	3.81347	4.30067	4.294	4.94686	5.1666	5.71105	1.13879	0.0184577
SLK	TC1000008795.hg.1	6.2235	7.82686	7.55674	8.10266	8.34045	8.57906	1.13836	0.140266
HMMR	TC0500009320.hg.1	5.63925	5.76303	5.81321	7.01884	6.6364	6.97265	1.13747	0.00470776
KDM7A	TC0700012798.hg.1	6.16851	6.32018	6.4828	7.27895	7.55622	7.54213	1.13527	0.000890728
CWC27	TC0500007591.hg.1	7.73887	7.28739	7.92547	8.76829	8.87412	8.71368	1.13479	0.0215097
POTEF	TC0200014246.hg.1	7.70865	6.93324	7.52656	8.79711	8.46338	8.31209	1.13471	0.0211324
RMI1	TC0900007740.hg.1	7.36328	7.13963	6.90312	8.34987	8.44057	8.01914	1.13452	0.0035655
SGK3	TC0800012313.hg.1	4.76117	4.39737	5.14969	5.52779	5.79296	6.38921	1.13391	0.0286727
NCOR1	TC1700009881.hg.1	10.0161	9.98442	10.0217	11.003	11.2811	11.1313	1.1311	0.00433808
ARID2	TC1200007425.hg.1	8.14214	8.96881	8.28308	9.51648	9.49917	9.76379	1.12847	0.0366815
AFTPH	TC0200007805.hg.1	9.0313	8.88788	9.07493	10.227	9.98873	10.1636	1.12841	0.000324201
POTEE	TC0200009331.hg.1	6.86436	6.00813	7.78467	7.78961	8.30508	7.94614	1.12789	0.15028
PHIP	TC0600012358.hg.1	6.34621	6.40244	6.07807	7.11246	7.35388	7.74142	1.12701	0.0114755
ZNF559-ZNF177	TC1900006932.hg.1	7.90412	7.89822	8.01594	9.15871	8.97185	9.06814	1.12681	0.000140955
JMJD1C	TC1000012561.hg.1	5.38709	5.60856	4.9177	6.54811	6.63418	6.11024	1.12639	0.0137773
MGEA5	TC1000011659.hg.1	5.00038	5.30361	6.45389	6.97168	6.72364	6.44144	1.12629	0.113848
FAM173B	TC0500010081.hg.1	5.34723	4.905	4.15286	6.04647	6.48468	5.2484	1.12482	0.0888685
ZBTB24	TC0600014332.hg.1	7.94198	7.47745	7.68455	8.71599	8.8568	8.9055	1.12477	0.00656491
SIRPG	TC2000009971.hg.1	10.2515	10.2952	10.2624	11.3996	11.1532	11.6305	1.12472	0.0140487
CEP70	TC0300012572.hg.1	8.47188	7.98836	8.48464	9.5323	9.30881	9.47777	1.12467	0.0111569
POLA1	TC0X00006823.hg.1	6.78148	5.95189	6.92627	7.56107	7.62583	7.84383	1.12369	0.0566559
GPR19	TC1200009972.hg.1	8.01847	7.85139	8.173	9.21658	9.15934	9.03593	1.123	0.00140863
KRR1	TC1200011301.hg.1	7.41497	7.89795	7.36075	8.74663	9.18881	8.1064	1.12272	0.049723
PSMD1	TC0200011051.hg.1	7.51697	7.63087	8.30079	9.15368	8.8939	8.76844	1.12246	0.0283438
TGFBR1	TC0900008202.hg.1	4.30134	5.19497	4.56228	6.15654	5.61211	5.656	1.12202	0.0306688
IPO11	TC0500013175.hg.1	8.98694	8.41934	9.09517	10.1692	9.96225	9.73535	1.12178	0.0160447
KIF15	TC0300007223.hg.1	6.18978	6.11788	6.57953	7.38132	7.51521	7.3543	1.12121	0.00958736
IFI16	TC0100010244.hg.1	8.90887	8.61029	8.92267	9.81353	9.98427	10.0057	1.12056	0.00176752
ICE2	TC1500009639.hg.1	6.58839	6.01984	6.91895	8.01828	7.70725	7.15715	1.1185	0.0372051
SEC62	TC0300009458.hg.1	5.80134	6.27964	6.6887	7.55744	7.21843	7.34497	1.11705	0.0354947
NAA15	TC0400012846.hg.1	9.04608	8.31342	8.92051	9.75543	9.85803	10.0085	1.11398	0.0292505
VCPIP1	TC0800012422.hg.1	6.30021	5.28568	6.0881	7.44571	6.88093	6.68684	1.11317	0.0488089
NBPF19	TC0100018285.hg.1	5.26063	5.35438	5.68844	6.12576	7.11834	6.39737	1.11267	0.0472901
ZNF808	TC1900011793.hg.1	8.24349	7.56227	8.06391	8.80972	9.30053	9.09736	1.11265	0.014202
SMARCAD1	TC0400008170.hg.1	6.34168	6.83702	6.12801	7.29883	7.70364	7.63718	1.11098	0.016611
SOGA3	TC0600013119.hg.1	4.848	5.32957	5.26489	6.58277	6.06765	6.12479	1.11092	0.00760228
ATP8B1	TC1800008781.hg.1	5.14699	4.9702	5.29909	5.9714	6.34238	6.43287	1.11012	0.00446753
LMAN1	TC1800008824.hg.1	11.0127	10.7227	11.1594	12.2441	12.0924	11.888	1.1099	0.00296003
NUP107	TC1200008113.hg.1	5.86433	6.84742	6.27363	7.12069	7.62323	7.55889	1.10581	0.0401986
YME1L1	TC1000010115.hg.1	10.0875	10.1105	10.2784	11.0487	11.4848	11.2601	1.10575	0.00491511
EEA1	TC1200011519.hg.1	5.04741	5.31786	4.36467	5.92737	5.95294	6.16624	1.10553	0.0517173
TIPARP	TC0300012900.hg.1	4.82348	2.98409	3.86537	4.11819	6.53049	4.33727	1.10434	0.310822
CDKL5	TC0X00006723.hg.1	4.85459	3.87291	5.0681	5.98018	5.22822	5.89963	1.10415	0.0758796
PPP4R3A	TC1400009982.hg.1	9.03089	9.33793	9.55952	10.4906	10.8417	9.90573	1.10323	0.0359587
ZNF146	TC1900007917.hg.1	7.58694	8.03621	7.38672	8.96273	8.66686	8.68981	1.10318	0.0151201
DDIAS	TC1100013075.hg.1	5.41266	6.08695	5.59887	6.84635	6.70381	6.85003	1.10057	0.0264179
CCNT2	TC0200009428.hg.1	9.40269	9.32856	9.16283	10.0846	10.6534	10.4483	1.09743	0.0120267
PHF6	TC0X00008470.hg.1	9.94985	9.32696	9.79871	10.7978	10.9159	10.6502	1.09612	0.0169121
NCOA1	TC0200006969.hg.1	6.90489	6.85424	6.22969	7.89526	7.40555	7.9757	1.0959	0.0188017
AIM1	TC0600008981.hg.1	8.61226	8.36105	8.62042	9.72953	9.49732	9.6508	1.09464	0.000698437
STAG2	TC0X00008332.hg.1	8.97935	8.8978	10.5433	10.5943	10.3248	10.7837	1.09412	0.171668
SLC12A2	TC0500008568.hg.1	7.25717	7.32392	7.95759	8.85712	8.54695	8.41279	1.09273	0.0208774
BTBD7	TC1400010022.hg.1	6.13174	6.69384	6.55219	7.72603	7.33987	7.58874	1.09229	0.00842284
VEZT	TC1200008508.hg.1	6.10024	6.15336	6.72044	7.59692	7.50082	7.15125	1.09165	0.013942
RPS6KA5	TC1400009973.hg.1	4.2005	6.58966	5.42762	6.1655	6.47765	6.84656	1.09064	0.250743
CAPN7	TC0300006702.hg.1	5.99791	6.10051	6.59079	7.29177	6.9613	7.70412	1.08933	0.0190178
LCOR	TC1000008556.hg.1	7.58745	7.82801	7.498	8.50727	8.75316	8.91387	1.08695	0.00238894
SGOL2	TC0200010419.hg.1	5.64165	5.9502	5.67592	7.25824	6.2344	7.03574	1.08687	0.0618918
SPDL1	TC0500009377.hg.1	7.5824	7.4042	7.88052	8.63942	8.82626	8.65974	1.0861	0.00777936
BBS2	TC1600010409.hg.1	5.83514	5.537	5.85111	7.09665	6.78794	6.59605	1.0858	0.00519798
LRRC37A	TC1700008095.hg.1	10.5494	10.4811	11.006	11.5541	11.9234	11.8116	1.0842	0.00802775
IQCF3	TC0300013837.hg.1	5.69952	5.07474	5.12788	6.00257	6.76145	6.38952	1.0838	0.0220141
THAP5	TC0700013606.hg.1	7.64113	7.91871	7.18212	8.29578	8.62385	9.07369	1.08378	0.0254402
CHD6	TC2000009134.hg.1	7.06338	7.09023	6.86489	7.97817	8.10647	8.18511	1.08375	0.000361297
ELF1	TC1300008702.hg.1	11.0964	11.1526	11.4446	12.3911	12.3183	12.2355	1.08374	0.00417163
ATP8A1	TC0400010558.hg.1	2.7349	2.43479	2.38245	3.27801	3.3157	4.20942	1.08366	0.0571709
SPICE1	TC0300012023.hg.1	6.64466	6.78067	6.1614	7.69348	7.50415	7.63709	1.08266	0.021511
EIF2S2	TC2000008910.hg.1	4.44298	3.7155	3.78756	4.93799	5.51695	4.73808	1.08233	0.0301659
NRBP2	TC0800012168.hg.1	4.95521	5.09212	5.1268	6.0748	6.22849	6.11435	1.08117	0.000112651
UBR5	TC0800011314.hg.1	4.87012	6.31846	5.41326	5.95848	6.79785	7.08852	1.081	0.119929
CCDC93	TC0200014004.hg.1	8.87461	8.50052	8.53296	9.96844	9.69583	9.48452	1.08023	0.00455146
TMEM154	TC0400012150.hg.1	7.72063	7.38931	7.89888	8.90904	8.36646	8.97328	1.07999	0.0130276
ZBED6	TC0100011272.hg.1	10.6361	10.2956	10.7188	11.5792	11.6116	11.6968	1.07905	0.0100005
GRAMD1C	TC0300008371.hg.1	4.08237	3.92137	4.07654	5.74368	4.64674	4.92224	1.07746	0.0786323
BIRC3	TC1100013087.hg.1	4.84112	3.82553	4.30139	5.32923	5.774	5.092	1.07573	0.0456421
KIAA1524	TC0300011943.hg.1	7.67499	7.86936	7.87197	8.69044	8.91767	9.03535	1.07571	0.00174079
TAF1B	TC0200006665.hg.1	5.50584	5.01274	6.5859	7.40438	6.08204	6.84464	1.07552	0.151237
TNKS2	TC1000008447.hg.1	9.34604	8.96711	9.2391	10.4719	10.3729	9.93046	1.07433	0.00843943
KIF20A	TC0500008777.hg.1	8.50355	7.86095	8.87669	9.02515	9.7167	9.72219	1.07428	0.0493788
PPP2R5E	TC1400009388.hg.1	8.61003	8.48986	9.0299	9.91194	9.64595	9.78327	1.07045	0.0112208
ATRX	TC0X00010126.hg.1	4.42793	5.06243	5.15576	5.74123	5.88473	6.22993	1.06992	0.0231045
DDX10	TC1100008991.hg.1	4.7633	5.37333	5.73513	6.16704	6.41807	6.49478	1.06938	0.0510646
SMC2	TC0900008286.hg.1	5.60622	5.41188	6.03242	6.4657	6.98664	6.80576	1.06919	0.0118017
ZNF728	TC1900011922.hg.1	5.10987	5.64588	5.94228	6.1525	6.46078	7.28741	1.06755	0.0689614
PECAM1	TC1700011442.hg.1	9.42408	9.40929	9.59674	10.4125	10.849	10.3702	1.06718	0.0112953
ITPR1	TC0300006477.hg.1	4.36854	4.20053	4.17408	4.87732	5.64141	5.42299	1.06619	0.0351559
ARNTL2	TC1200007147.hg.1	5.39975	5.91431	6.35862	6.82475	7.00652	7.03843	1.06567	0.0544862
SF3B1	TC0200015348.hg.1	7.41279	7.30141	7.50694	8.32796	8.90017	8.18685	1.06461	0.0321458
SLC38A1	TC1200010516.hg.1	12.752	12.4231	12.9343	13.8514	13.2336	14.2101	1.06189	0.045318
ANKRD20A4	TC0900012135.hg.1	6.38103	6.20323	6.45206	7.58287	7.48094	7.1572	1.06156	0.0045106
ANKRD36	TC0200008536.hg.1	8.35227	7.92872	8.32426	9.48302	9.10711	9.19657	1.06048	0.00440046
SON	TC2100006974.hg.1	8.1412	8.43876	8.55619	9.4502	9.59164	9.27502	1.06024	0.00310584
ZKSCAN1	TC0700008517.hg.1	8.77088	9.01484	9.2131	9.94562	9.90846	10.3246	1.05994	0.00456762
DPP8	TC1500009797.hg.1	8.29562	8.95925	8.75589	9.69322	9.8122	9.68426	1.05964	0.0283125
TBC1D15	TC1200008184.hg.1	7.14195	6.32578	6.46808	7.80638	7.71709	7.58992	1.05919	0.0450417
MICU1	TC1000010995.hg.1	4.34661	3.99464	4.31046	5.67622	4.71125	5.44177	1.05918	0.053151
CHD1	TC0500011554.hg.1	8.31673	7.09843	7.10791	8.59115	8.68858	8.41752	1.05806	0.115362
PIK3CA	TC0300009597.hg.1	7.19909	7.08096	7.84678	8.49346	8.75372	8.05115	1.05716	0.0291329
HSPA13	TC2100007597.hg.1	6.67734	6.36656	6.93826	7.497	7.92616	7.72452	1.05517	0.00847971
PIK3CG	TC0700008743.hg.1	7.06676	7.58496	7.82777	8.62523	8.63328	8.38517	1.05473	0.0307544
HACE1	TC0600012702.hg.1	6.05401	5.4026	5.76358	7.08182	6.84017	6.46071	1.05417	0.0156917
ARHGAP11B	TC1500010709.hg.1	6.42201	5.93733	5.98755	7.19999	6.98936	7.31523	1.05257	0.00747859
MED23	TC0600013177.hg.1	7.8129	7.74497	7.44976	8.61037	8.96156	8.59337	1.05256	0.00307033
ANKRD18A	TC0900010056.hg.1	6.79009	6.39913	5.66067	6.88312	7.70882	7.41274	1.05159	0.0679552
AGGF1	TC0500007841.hg.1	7.78054	8.26489	8.07635	9.29331	9.06776	8.9144	1.05123	0.0049966
KAT6A	TC0800010258.hg.1	8.06574	7.72473	8.16033	9.02352	9.13891	8.93774	1.04979	0.00718728
EIF2AK3	TC0200013376.hg.1	5.92342	6.72154	6.10226	7.18438	7.66561	7.04583	1.04953	0.029194
PRRC2C	TC0100010592.hg.1	9.49655	9.75796	8.98874	10.6102	10.5055	10.2738	1.04873	0.0283976
NAIP	TC0500011049.hg.1	6.89674	6.56151	7.08674	8.16325	7.53868	7.98398	1.04697	0.0131618
CDC40	TC0600009112.hg.1	9.85574	10.1453	10.0168	11.152	10.9998	11.0048	1.04625	0.00118158
CEP63	TC0300008888.hg.1	8.4261	8.33037	8.63072	9.45091	9.46483	9.60761	1.04539	0.00156482
USP9X	TC0X00007026.hg.1	7.89043	7.46763	7.57775	8.59045	8.74338	8.73655	1.04486	0.00739979
AIMP1	TC0400008335.hg.1	7.04037	6.93121	7.53602	8.37528	8.40065	7.86567	1.04467	0.015013
TRIM24	TC0700009317.hg.1	8.53422	7.49866	7.95422	9.05745	9.1424	8.919	1.04392	0.067392
NCOA3	TC2000007572.hg.1	8.75077	8.86196	8.96932	9.88899	9.96143	9.86154	1.04331	0.000853721
KLHL32	TC0600008883.hg.1	3.64395	3.57428	3.91524	4.57981	4.80885	4.87401	1.04307	0.0017519
ANKRD22	TC1000011368.hg.1	4.23178	3.49138	4.01616	4.47914	4.9058	5.4815	1.04237	0.0498724
ZBTB26	TC0900011454.hg.1	5.76828	4.98922	4.78366	6.07652	6.10939	6.47952	1.04142	0.0569899
MTRNR2L6	TC0700009462.hg.1	4.14539	4.31625	4.32271	5.25759	5.13764	5.51272	1.0412	0.00350988
DICER1	TC1400010068.hg.1	4.83774	4.64313	4.29874	5.32212	5.42626	6.15322	1.04066	0.0367261
ZNHIT6	TC0100014788.hg.1	6.90341	7.54634	7.99471	8.54506	8.73324	8.28708	1.04031	0.0655301
HIVEP2	TC0600013409.hg.1	6.67283	5.52651	7.41043	7.94915	7.37917	7.40177	1.04011	0.190205
ZNF507	TC1900007743.hg.1	7.31269	7.5867	6.90332	8.45549	8.19351	8.2733	1.03987	0.0228599
SLC7A11	TC0400011920.hg.1	7.04332	7.58526	7.24374	8.2351	8.38332	8.37272	1.0396	0.015928
EXT1	TC0800011595.hg.1	3.62228	3.91434	3.93316	4.89518	4.84638	4.845	1.03892	0.00794068
CDC25C	TC0500012166.hg.1	8.71268	9.06257	9.26582	9.94078	10.2236	9.9906	1.03796	0.010254
IARS	TC0900010789.hg.1	10.1518	9.6425	10.352	11.0157	11.1415	11.1027	1.03789	0.035582
2011-09-01	TC0400007913.hg.1	8.80036	8.2922	8.76511	9.61079	9.51528	9.8419	1.03677	0.0098573
SP4	TC0700006864.hg.1	6.86576	6.61903	6.72564	7.68282	7.66477	7.96884	1.03533	0.00155656
PBRM1	TC0300011175.hg.1	6.31509	6.57757	6.3758	7.57526	7.6116	7.18747	1.03529	0.00568084
PCMTD1	TC0800010417.hg.1	8.81698	8.3075	9.01274	9.70496	10.0228	9.5098	1.03345	0.019596
ZNF546	TSUnmapped00000089.hg.1	2.98612	2.68049	3.3782	3.83473	5.20854	3.09975	1.03273	0.231317
ATP13A3	TC0300014090.hg.1	9.80417	8.95079	9.64013	10.4673	10.4784	10.547	1.03255	0.0573168
RSL1D1	TC1600009420.hg.1	11.3961	11.4063	11.9969	12.3752	13.0678	12.4534	1.03236	0.0254573
ARFIP1	TC0400009024.hg.1	5.58729	6.08911	6.95487	7.49553	7.19754	7.03422	1.03201	0.110934
LRP6	TSUnmapped00000106.hg.1	5.65453	5.0335	5.70218	6.63396	5.93898	6.9114	1.03137	0.0504085
MDM2	TC1200008116.hg.1	8.70896	8.2843	8.54881	9.52096	9.61873	9.49353	1.03038	0.00917878
USP32	TC1700011313.hg.1	6.50282	6.78901	7.02961	7.85836	7.59214	7.95912	1.02939	0.00707477
INO80D	TC0200015506.hg.1	8.96519	8.94352	8.55977	9.75943	9.7087	10.0859	1.02852	0.00451736
SCAP	TC0300007296.hg.1	8.68949	8.85858	7.71819	9.39269	9.63705	9.31565	1.02637	0.0928692
USP34	TC0200012734.hg.1	7.82932	6.83775	7.30608	8.66811	8.22116	8.16283	1.02631	0.0490836
INO80	TC1500009138.hg.1	6.57058	6.09582	6.43397	6.96817	7.81216	7.39436	1.02477	0.0320084
ARL6IP1	TC1600011494.hg.1	9.53793	9.74906	10.1998	10.5594	11.1625	10.8386	1.02458	0.0177332
EML4	TC0200007353.hg.1	8.80668	8.64346	9.21086	9.8208	9.73954	10.1702	1.0232	0.0100929
ZNF10	TC1200012736.hg.1	3.18667	3.2559	3.8384	4.65055	3.69747	5.00121	1.02275	0.101889
PAK1IP1	TC0600006926.hg.1	7.24821	7.56528	7.67774	8.81756	8.72002	8.02083	1.02239	0.0364282
FASTKD2	TC0200010582.hg.1	4.8705	4.99282	5.02851	6.09759	6.14156	5.71585	1.02106	0.0102278
CCDC112	TC0500011748.hg.1	8.01564	6.3627	7.02292	8.25138	8.37756	7.83381	1.0205	0.157693
NCAPG2	TC0700013290.hg.1	9.93262	10.2186	10.3047	11.0283	11.2656	11.2223	1.02007	0.00290421
SLC26A2	TC0500009076.hg.1	5.43767	4.87192	6.22981	6.65735	6.24154	6.69968	1.01972	0.108994
CEP120	TC0500011881.hg.1	7.66498	7.75579	7.65792	8.84612	8.72861	8.55864	1.01823	0.00291034
PPIP5K2	TC0500008232.hg.1	7.15278	7.33845	6.77352	7.99506	8.31172	8.0091	1.01704	0.010518
ZNF638	TC0200007998.hg.1	5.67078	5.39328	6.10715	6.9337	6.37968	6.90826	1.01681	0.0216704
EPB41L5	TC0200009078.hg.1	7.99245	8.00385	8.45612	9.17468	9.14358	9.18342	1.01642	0.0212747
EIF3J	TC1500007093.hg.1	9.43566	9.81717	10.1822	10.6934	11.0865	10.7031	1.01596	0.0230573
HIPK3	TC1100007227.hg.1	5.75474	7.25506	7.78018	7.9509	7.78058	8.10075	1.01409	0.234839
HRASLS5	TC1100011122.hg.1	3.77474	3.77701	3.80632	5.28583	4.37602	4.73811	1.01396	0.0615809
TNPO1	TC0500007754.hg.1	8.71359	9.47861	9.32596	10.185	10.2194	10.1499	1.01206	0.0484821
KIF15	TSUnmapped00000242.hg.1	4.45728	3.91826	4.91252	5.76069	5.44591	5.11498	1.01117	0.0507208
RAD51AP1	TC1200006561.hg.1	7.34684	7.77945	7.37572	8.50168	8.3796	8.65234	1.01053	0.00691634
CD2AP	TC0600008183.hg.1	7.9023	8.04994	8.20245	9.29401	8.83545	9.05126	1.00868	0.00508169
ERCC5	TC1300009994.hg.1	9.64198	9.34181	9.56922	10.7259	10.2473	10.6055	1.00855	0.00682457
MELK	TC0900007129.hg.1	10.155	9.78317	10.2912	11.1741	11.1245	10.954	1.0077	0.0115202
SNX16	TC0800010949.hg.1	5.94355	5.26032	6.53546	6.89606	6.97083	6.89389	1.00715	0.11113
DDX46	TC0500013228.hg.1	6.72804	7.36628	7.36716	8.4771	7.74609	8.25418	1.00529	0.0296022
CEP44	TC0400009352.hg.1	6.0351	6.40257	6.47347	7.48034	7.10718	7.33537	1.00392	0.0051673
DDX1	TC0200006788.hg.1	6.02601	6.73398	6.29509	7.46927	7.1978	7.39853	1.00351	0.0271125
SPTBN1	TC0200007609.hg.1	12.669	12.8285	12.6479	13.6451	13.7368	13.7733	1.00324	0.000294381
RASA1	TC0500008014.hg.1	5.4305	5.08163	6.04066	6.64594	6.25753	6.65894	1.00321	0.0516539
MAP3K4	TC0600010095.hg.1	6.14702	4.83409	5.71612	6.53534	6.53414	6.63379	1.00201	0.121033
MUT	TC0600011996.hg.1	6.68771	5.69962	6.36641	7.26777	7.07291	7.41907	1.002	0.0622457
CUL3	TC0200015887.hg.1	7.95702	7.96066	8.21967	9.19742	8.92821	9.01087	0.999712	0.00109676
STAM2	TC0200014623.hg.1	8.53577	8.57573	7.96877	9.38711	9.62733	9.06288	0.999014	0.018417
ICA1L	TC0200015460.hg.1	6.9407	7.49592	6.8451	8.14569	8.37544	7.75406	0.997824	0.0219269
ANKRD20A1	TC0900007472.hg.1	6.626	6.64625	6.9378	7.27066	8.08909	7.84158	0.997089	0.039116
GNAQ	TC0900010485.hg.1	10.4855	10.3722	10.5958	11.6519	11.3032	11.4851	0.995567	0.00222508
RNF6	TC1300010025.hg.1	7.63833	8.24344	8.28721	8.7774	9.44815	8.929	0.995188	0.0270224
IMPA1	TC0800010944.hg.1	6.94422	7.82081	7.69321	8.36892	8.85252	8.22185	0.995016	0.0467651
TPH1	TC1100013150.hg.1	3.34564	3.22838	3.37145	4.10446	4.1625	4.66166	0.994384	0.0246166
RAB8B	TC1500007518.hg.1	9.60307	9.53556	9.68043	10.5032	10.8791	10.4195	0.994228	0.0138171
H2BFM	TC0X00008026.hg.1	5.27575	5.31954	5.82162	6.17833	6.7935	6.4263	0.993738	0.0165251
RPAP3	TC1200010550.hg.1	5.85244	6.30923	7.20839	8.11684	7.0572	7.17724	0.993737	0.130933
AP3B1	TC0500011219.hg.1	5.94043	6.83055	6.46415	7.42012	7.11814	7.67667	0.993265	0.0400869
RBM45	TC0200010112.hg.1	6.87458	4.80537	5.8055	6.75731	6.66915	7.03723	0.99274	0.235926
ZFYVE16	TC0500007912.hg.1	5.3155	5.56367	5.97178	6.56148	6.61357	6.65299	0.992363	0.0331288
AKAP11	TC1300006989.hg.1	7.41899	6.70093	6.92926	8.15678	7.57074	8.29712	0.991821	0.0321184
MBNL3	TC0X00010837.hg.1	8.18736	8.35539	9.01417	9.64553	9.65522	9.22941	0.991079	0.0388464
DIAPH3	TC1300009088.hg.1	10.2073	9.87947	10.2928	11.0844	11.04	11.2268	0.990571	0.00723215
POLI	TC1800007354.hg.1	6.05904	6.26412	6.09638	7.51866	6.92328	6.94733	0.989909	0.0272268
HCFC2	TC1200008671.hg.1	5.31285	5.26879	6.05641	6.46134	6.41047	6.73245	0.988739	0.0462314
RALGPS2	TC0100010755.hg.1	5.93835	6.73145	6.66157	7.29611	7.64604	7.35417	0.988316	0.0438488
PREPL	TC0200012433.hg.1	7.79853	7.50085	7.51221	8.62835	8.61617	8.53068	0.987866	0.00565068
R3HCC1L	TC1000008595.hg.1	4.41833	4.03828	4.264	5.31306	5.02145	5.34896	0.987621	0.00289276
USP47	TC1100006860.hg.1	6.70925	6.37396	6.0457	7.0621	7.62838	7.39839	0.986651	0.0181875
ZNF770	TC1500009005.hg.1	7.04272	7.00809	6.85546	7.73703	8.32478	7.80283	0.986119	0.0253961
WBP4	TC1300006965.hg.1	7.49984	7.8971	7.83875	8.81053	8.56483	8.81639	0.985352	0.00431917
CKAP5	TC1100010713.hg.1	7.83018	8.26425	8.02985	9.14642	8.97772	8.95568	0.98518	0.00664964
USO1	TC0400007879.hg.1	9.26645	9.18028	9.59896	10.4187	10.2855	10.2953	0.984592	0.0101855
SLMAP	TC0300013842.hg.1	4.44826	4.88892	4.99472	5.59755	6.04419	5.64388	0.984572	0.0115975
CWF19L2	TC1100012208.hg.1	5.02428	3.97808	4.9411	5.02968	5.73647	6.12557	0.982753	0.101885
CCDC15	TC1100009407.hg.1	5.56534	6.15006	6.17196	6.83324	7.15308	6.84921	0.982721	0.0216936
INTS6	TC1300008983.hg.1	7.8308	7.57918	7.70385	8.73471	8.7007	8.62602	0.98253	0.00171098
ZNF197	TSUnmapped00000358.hg.1	3.79324	4.11543	4.15213	5.02201	5.09398	4.88745	0.980877	0.00449188
ZNF354B	TC0500009669.hg.1	5.19735	5.6635	4.31298	5.92105	6.48079	5.71167	0.979892	0.11593
CEP295	TC1100008786.hg.1	5.16288	4.79145	4.10997	5.49184	5.32208	6.18911	0.979574	0.0751072
UBA5	TC0300008849.hg.1	7.68428	7.95501	8.62386	9.07485	9.20064	8.92633	0.979558	0.0630561
QSER1	TC1100007217.hg.1	7.69471	8.31112	8.21565	8.97069	8.94485	9.24235	0.978802	0.0206032
TCERG1	TC0500009010.hg.1	3.60706	3.86491	3.26209	4.3683	4.55241	4.74962	0.978753	0.0135899
DDX52	TC1700010501.hg.1	9.02116	9.77074	9.59426	10.5218	10.5907	10.2096	0.978659	0.0311075
CEP350	TC0100010793.hg.1	5.35709	3.49093	4.4844	5.31025	5.05265	5.9054	0.978627	0.203907
CEACAM19	TC1900011757.hg.1	3.67859	3.56475	3.55288	3.78923	5.16137	4.77536	0.976573	0.138041
VPS8	TC0300009724.hg.1	4.73382	5.91394	6.38812	6.94484	6.71761	6.30295	0.976504	0.175797
CDC5L	TC0600008132.hg.1	6.96307	6.71721	7.28015	7.85554	8.13227	7.9012	0.976196	0.0127955
NIN	TC1400009141.hg.1	6.15172	6.51673	6.41179	7.5063	7.17911	7.32164	0.975602	0.00264465
LRRC58	TC0300012143.hg.1	8.70988	8.10932	8.35616	9.3133	9.36457	9.42022	0.974242	0.0274521
NR3C1	TC0500012340.hg.1	8.40793	8.83022	8.33192	9.54233	9.53671	9.41372	0.974226	0.018663
POGZ	TC0100015797.hg.1	6.21221	4.47378	4.9554	5.91755	5.83195	6.81355	0.973883	0.19822
CENPC	TC0400010884.hg.1	7.3189	7.07311	6.17689	7.56049	7.92701	8.00099	0.973199	0.0922451
LRRTM4	TC0200016694.hg.1	4.42888	4.27667	4.54623	5.19761	5.27609	5.69673	0.972885	0.01169
ATP11C	TC0X00010966.hg.1	7.43833	7.30234	7.22091	8.05931	8.2302	8.5907	0.972878	0.0146689
SRSF12	TC0600012536.hg.1	3.30341	4.79193	4.00248	5.04484	5.22027	4.75062	0.972635	0.142243
HIST1H2BI	TC0600007293.hg.1	11.5595	11.6593	11.9792	12.4413	13.0741	12.5996	0.97236	0.0175402
UBR2	TC0600008050.hg.1	8.51525	8.62869	8.34716	9.44169	9.39802	9.56767	0.972097	0.00127831
BRCA2	TC1300006802.hg.1	6.8447	6.85769	6.71434	7.5012	7.99052	7.84006	0.971684	0.0147109
ZFP14	TC1900010521.hg.1	3.93622	4.22392	4.4605	5.21523	4.8175	5.50161	0.971233	0.0200551
ADAL	TC1500007056.hg.1	7.52618	7.54039	8.24943	8.4914	8.8265	8.899	0.966971	0.0366156
MBTD1	TC1700011131.hg.1	7.89834	8.13224	8.58604	9.72911	8.94852	8.83938	0.9668	0.0544403
TAX1BP1	TC0700007024.hg.1	6.0454	7.14893	7.15624	7.65004	7.90051	7.70025	0.966741	0.114543
PDE5A	TC0400011712.hg.1	4.55949	4.94851	5.22509	5.94472	5.72757	5.95993	0.966373	0.0255295
NUP50	TC2200007607.hg.1	11.5879	11.6331	11.4757	12.5502	12.6586	12.3866	0.96625	0.00128401
DOCK10	TC0200015893.hg.1	6.06471	6.02352	6.65489	7.39615	6.97223	7.27078	0.965348	0.0225557
WDR3	TC0100009580.hg.1	6.98982	7.05489	7.50644	7.8151	8.3963	8.23448	0.964913	0.0154287
NPAT	TC1100012225.hg.1	5.79643	6.46089	6.25469	7.01719	7.08731	7.29997	0.964151	0.0250068
GORAB	TC0100010565.hg.1	5.43731	5.38572	5.61681	6.50984	6.60776	6.21402	0.963929	0.00457959
RASGRP1	TC1500009056.hg.1	9.95804	10.0919	10.2199	10.8117	11.2988	11.051	0.963877	0.00855079
ATF7IP	TC1200006935.hg.1	8.03199	8.5972	8.15711	9.08845	9.2458	9.34339	0.963776	0.0178143
GK	TC0X00006891.hg.1	5.87788	6.38646	6.24492	6.84594	7.09245	7.45895	0.962691	0.0154267
ROCK2	TC0200011745.hg.1	4.34314	5.24008	3.71679	4.49584	5.65147	6.03718	0.961495	0.207687
TCEB3CL	TC1800009279.hg.1	4.35065	5.1472	4.97178	5.92077	5.76778	5.66286	0.960593	0.0475073
TRIP12	TC0200015963.hg.1	8.36398	8.46702	8.32163	9.20448	9.53064	9.2966	0.959697	0.00395144
HELZ	TC1700011519.hg.1	8.21553	7.9134	8.13555	8.77946	9.29666	9.06729	0.959644	0.0093095
KIAA1324L	TC0700011692.hg.1	6.41817	6.33305	6.61681	7.30345	7.42971	7.51343	0.959518	0.00116501
CNST	TC0100012272.hg.1	5.50007	5.52549	6.3077	6.39342	6.90887	6.90911	0.95938	0.0470847
MIER1	TC0100008641.hg.1	7.81161	7.43257	8.34285	8.9584	8.73565	8.76966	0.958895	0.059897
DIS3	TC1300009232.hg.1	7.90315	8.46676	8.14165	9.05003	9.17314	9.16461	0.958743	0.0226733
ACADM	TC0100018236.hg.1	9.01039	8.62303	9.2683	9.97655	10.0838	9.71485	0.957841	0.018594
FAR2P1	TC0200014244.hg.1	5.44876	5.28276	5.08001	6.46601	5.86135	6.35683	0.957551	0.018402
CDC27	TC1700010927.hg.1	9.89607	9.98329	9.70124	10.5286	10.7657	11.1589	0.957535	0.0208942
SMC1A	TC0X00009760.hg.1	10.0533	9.55092	9.97416	10.8912	10.8971	10.6619	0.957259	0.0126007
UPF3B	TC0X00010652.hg.1	6.83883	7.49084	6.93674	7.9274	8.22108	7.98697	0.956347	0.02736
OSBPL8	TC1200011321.hg.1	8.15857	7.75704	7.85225	8.85689	8.91043	8.86772	0.955728	0.0144002
BLM	TC1500008328.hg.1	6.53262	7.54249	7.04386	8.39537	7.68251	7.9077	0.955536	0.0623878
C14orf177	TC1400008155.hg.1	4.87419	5.21439	5.37447	6.22624	6.07007	6.03012	0.954459	0.0132281
SPAG9	TC1700011128.hg.1	7.80212	7.63684	7.75567	8.63208	8.64472	8.77927	0.953813	0.000152762
RAB3GAP1	TC0200009431.hg.1	6.10126	6.31784	6.6293	6.98393	7.78426	7.13853	0.952775	0.0389371
HIST1H2BL	TC0600011224.hg.1	9.71238	10.093	10.5811	11.1129	11.1037	11.0262	0.952118	0.061568
TSC1	TC0900011820.hg.1	3.72072	3.51999	3.63999	5.02332	4.74643	3.96687	0.951973	0.0903234
KIF20B	TC1000008406.hg.1	7.13394	6.31037	6.45061	7.51523	7.74313	7.48783	0.95042	0.0536997
NHLRC2	TC1000008961.hg.1	7.86116	7.98871	7.56576	8.7391	8.7833	8.74441	0.950397	0.0159977
TCAF1	TC0700012898.hg.1	4.54553	4.85349	4.70453	6.08845	5.41036	5.45572	0.950329	0.034859
PELI2	TC1400007259.hg.1	8.79688	8.68194	9.59292	10.125	9.98732	9.80845	0.949687	0.0686513
SLC30A9	TC0400007361.hg.1	9.40847	9.65482	9.82682	10.2655	10.6633	10.8078	0.94884	0.0113082
CDC73	TC0100011027.hg.1	7.88985	7.5795	7.65977	8.46804	9.00189	8.50248	0.947763	0.0159564
CSDE1	TC0100015353.hg.1	10.2864	10.308	10.5665	11.164	11.1392	11.7004	0.94756	0.0200664
ZBTB11	TC0300011859.hg.1	5.7122	5.43763	6.23628	6.08432	6.96141	7.18288	0.947501	0.089317
KIDINS220	TC0200016624.hg.1	6.79712	7.40772	7.28971	8.02165	8.3537	7.96075	0.947183	0.0181481
ZNF423	TC1600010244.hg.1	3.18697	3.19231	3.47446	4.24371	3.86266	4.58848	0.947036	0.0298956
CEP57L1	TC0600009080.hg.1	6.5192	5.7624	7.03172	7.25492	7.34638	7.55034	0.946107	0.117314
PRPF40A	TC0200014631.hg.1	8.93176	8.62928	8.64552	9.57251	9.81917	9.65222	0.94578	0.00208413
SMCHD1	TC1800006487.hg.1	6.40741	6.10453	6.28307	7.24347	6.89741	7.48961	0.945161	0.0165324
DNAJC3	TC1300007755.hg.1	7.23516	7.65906	7.69106	8.43876	8.6876	8.29174	0.944274	0.0083235
ZMYND10	TC0300011107.hg.1	5.14206	5.54104	5.48106	5.93875	6.23242	6.82343	0.943481	0.0498169
NUP160	TC1100010762.hg.1	8.99169	9.42206	9.27727	10.0874	10.4924	9.93883	0.942529	0.0123595
C10orf12	TC1000008558.hg.1	5.89216	5.65516	6.60825	6.81209	6.97	7.20049	0.942336	0.0660215
DYNC1H1	TC1400008341.hg.1	10.5876	11.0433	10.8709	11.9274	11.6356	11.7659	0.942333	0.0065395
BBS9	TC0700007137.hg.1	7.14745	6.719	7.33646	8.45544	7.77958	7.79448	0.942196	0.0325449
ZAK	TC0200009986.hg.1	7.89566	7.13862	7.46396	8.55337	8.30633	8.46105	0.940839	0.0394407
EID3	TC1200008678.hg.1	6.8399	6.93261	6.73822	7.38749	8.04221	7.90228	0.940414	0.0340242
SLC17A9	TC2000008037.hg.1	5.53099	5.40841	5.06896	6.20918	6.62363	5.99648	0.940311	0.0175031
WDR17	TC0400009376.hg.1	4.85621	5.28343	4.76574	6.25146	5.52653	5.94813	0.940246	0.026427
ANP32E	TC0100015725.hg.1	9.39788	9.66367	9.6079	10.3023	10.8305	10.3566	0.93998	0.0164944
HIST1H3H	TC0600007375.hg.1	9.9257	9.42137	10.1146	10.8393	10.9713	10.4706	0.939873	0.0249432
ARID4B	TC0100018568.hg.1	6.56473	4.86379	6.43992	7.23758	6.44374	7.00278	0.938556	0.222587
RBMS1	TC0200014735.hg.1	5.02901	5.40043	4.9966	6.25145	5.8348	6.15514	0.938448	0.00655673
CDKL2	TC0400011043.hg.1	3.7801	4.17317	4.42627	5.26268	4.66496	5.26721	0.938439	0.0269662
SP100	TC0200011023.hg.1	5.46273	5.6515	5.96579	6.56304	6.6905	6.63796	0.93716	0.0186359
EPC2	TC0200009612.hg.1	5.90152	5.38983	6.04685	6.83539	6.82821	6.48602	0.937141	0.0235781
ZFY	TC0Y00006487.hg.1	4.80829	4.46992	4.36841	5.50084	5.53603	5.41613	0.93546	0.014664
POU2F1	TC0100010499.hg.1	11.3453	11.3523	10.9989	12.2083	12.3701	11.9241	0.935353	0.0061019
CRYM	TC1600009677.hg.1	4.20387	4.51177	4.39234	5.11537	5.57313	5.22202	0.934178	0.0075063
CHEK1	TC1100013111.hg.1	11.196	10.975	11.1899	11.8911	12.3474	11.9201	0.93262	0.0117105
MYCBP2	TC1300009293.hg.1	5.72215	5.20992	4.80669	6.39575	5.78081	6.35869	0.932159	0.0524707
IGF2BP1	TC1700008186.hg.1	4.54075	4.83342	5.32965	5.73095	5.92309	5.84545	0.931892	0.0490986
PSMD12	TC1700011523.hg.1	7.80392	7.77801	8.18295	8.70786	8.8825	8.96926	0.931582	0.0069704
CEP97	TC0300008182.hg.1	6.53399	5.97365	6.27057	7.09864	7.27951	7.19314	0.931025	0.0206854
OSBPL1A	TC1800008301.hg.1	8.08187	8.00879	8.21322	8.87863	9.52038	8.69453	0.929886	0.0584466
DOPEY1	TC0600008663.hg.1	5.7259	5.40776	3.57041	5.9699	5.89484	5.62599	0.928891	0.299911
SPATA5	TC0400008620.hg.1	7.52156	6.76844	7.99494	8.52553	8.37546	8.16688	0.927644	0.112107
PRF1	TC1000010925.hg.1	6.2823	6.49404	6.60669	7.38279	7.73486	7.04702	0.927216	0.0266571
TBL1XR1	TC0300013215.hg.1	6.86034	6.41346	6.50675	7.54291	7.30361	7.71546	0.927145	0.00720001
AP4E1	TC1500007217.hg.1	6.15847	6.49886	6.65564	7.31782	7.22544	7.5508	0.927028	0.0091684
TBK1	TC1200008003.hg.1	5.27189	5.91987	5.84719	6.70263	6.45641	6.66065	0.926914	0.0331987
EIF2S2	TC2000008909.hg.1	11.3792	11.8361	11.9369	12.5508	12.6822	12.6995	0.926767	0.0258338
TTC33	TC0500010579.hg.1	5.82562	6.53226	5.5247	6.87405	6.80862	6.97741	0.925832	0.0864551
CPSF2	TC1400008007.hg.1	10.2056	10.3645	10.3938	11.3146	11.3442	11.0825	0.92579	0.00128666
FOXN2	TC0200007533.hg.1	7.34414	7.99126	7.8061	8.7921	8.4986	8.6281	0.925767	0.025982
CNTROB	TC1700006782.hg.1	4.53317	5.35284	4.69736	6.06012	5.94553	5.35473	0.925669	0.0505753
IWS1	TC0200016727.hg.1	8.37282	8.48531	8.6849	9.4891	9.24939	9.58117	0.925543	0.00239613
TPR	TC0100016709.hg.1	5.43956	5.89576	5.85745	6.73838	6.75451	6.47602	0.925378	0.00950195
MYH10	TC1700009694.hg.1	10.8443	10.6843	10.7856	11.5518	11.9883	11.5455	0.92378	0.0169272
DDX18	TC0200009041.hg.1	8.48376	8.89678	8.73218	9.67145	9.81445	9.39482	0.922668	0.00583904
RWDD2A	TC0600008665.hg.1	6.58711	5.21228	6.64409	6.72304	7.27745	7.20897	0.921994	0.178307
SLC35A3	TC0100009195.hg.1	8.8366	7.96561	8.83084	9.4144	9.74683	9.23776	0.921986	0.0662609
FAM72D	TC0100009723.hg.1	12.7622	12.4063	12.5335	13.4538	13.3401	13.6738	0.92192	0.00301365
AZI2	TC0300010581.hg.1	5.84427	5.49913	5.6861	6.84648	6.35014	6.59768	0.921599	0.00842849
MAP3K7	TC0600012566.hg.1	8.78446	8.75324	8.98827	9.69637	9.80527	9.78886	0.921505	0.00196798
C15orf40	TC1500010255.hg.1	7.075	7.38564	7.3835	7.99579	8.52778	8.08003	0.919823	0.0139
RFESD	TC0500013200.hg.1	5.89873	6.00603	5.85323	7.07293	6.83705	6.60544	0.919146	0.0136503
TAF2	TC0800011625.hg.1	8.85942	8.55851	8.39607	9.91285	9.29959	9.35863	0.919025	0.0223969
LOC100133315	TC1100011535.hg.1	5.25885	5.93828	6.23611	7.34393	6.4681	6.37633	0.918373	0.0958426
LINC01359	TC0100014459.hg.1	3.64662	4.63577	4.21566	4.39148	5.90743	4.95371	0.918187	0.168381
GPR174	TC0X00007721.hg.1	6.4894	6.08517	5.91681	7.13178	6.7354	7.3775	0.917769	0.0224721
SGK3	TC0800012312.hg.1	5.49785	6.04007	7.02538	7.07561	6.96335	7.27716	0.917603	0.172106
STK38L	TC1200007146.hg.1	5.76807	7.4924	6.41701	7.08683	8.00542	7.338	0.917595	0.204721
PMAIP1	TC1800007471.hg.1	6.61144	5.78406	6.71306	6.81745	7.90299	7.14065	0.917512	0.103704
DEK	TC0600010962.hg.1	11.8896	11.9092	12.0922	12.7992	13.016	12.8269	0.917047	0.000623121
ARHGAP15	TC0200009539.hg.1	8.90387	9.43701	9.343	10.1575	10.3927	9.88429	0.916885	0.0145114
AP3M1	TC1000011050.hg.1	11.9043	11.6061	11.6203	12.5714	12.7519	12.5568	0.916473	0.00256649
RSAD2	TC0200016402.hg.1	5.7169	6.47263	6.2361	6.9212	7.67915	6.57284	0.915855	0.0902513
PDCD4	TC1000008904.hg.1	8.75427	8.69345	8.99134	9.68325	9.62803	9.87138	0.91453	0.00171406
TMEM26	TC1000010744.hg.1	7.83843	8.26811	6.89016	8.65222	8.31866	8.76892	0.914364	0.143503
FXR1	TC0300013908.hg.1	9.6908	8.8229	9.10645	10.0413	10.0274	10.2934	0.913997	0.057742
WDR75	TC0200010246.hg.1	9.25439	9.09379	8.73089	9.92918	10.0612	9.82836	0.913214	0.015724
ELF2	TC0400011932.hg.1	8.30769	7.6615	8.65134	9.02617	9.46428	8.86848	0.9128	0.0672629
USP37	TC0200015729.hg.1	8.74362	7.2501	8.04433	9.13492	8.69523	8.93981	0.910639	0.161109
INSIG2	TC0200009049.hg.1	7.15246	6.17352	7.23847	8.09123	7.40202	7.80238	0.910393	0.0987675
HIVEP1	TC0600014074.hg.1	5.59781	7.14473	6.57554	7.21148	7.12628	7.7101	0.909924	0.171197
DDX6	TC1100012495.hg.1	9.78758	9.50152	9.6403	10.3146	10.9374	10.4059	0.909508	0.0283742
ZNF468	TC1900012026.hg.1	7.06004	6.80332	6.66069	7.61987	7.86678	7.76388	0.908823	0.00507158
TRIM47	TC1700011774.hg.1	3.66118	4.14499	4.37086	5.10367	4.6896	5.1101	0.90878	0.028436
TAF1	TC0X00007571.hg.1	4.41596	4.30688	4.58536	5.96234	5.07885	4.99304	0.908677	0.0908066
LEO1	TC1500009446.hg.1	7.64423	6.56467	6.62688	7.81072	7.88373	7.86711	0.908593	0.121252
ZNF791	TC1900007085.hg.1	6.32189	5.45572	5.6628	6.68555	7.1359	6.34464	0.90856	0.0601092
ASPM	TC0100016831.hg.1	6.11505	6.20511	5.9722	6.57462	7.26448	7.1769	0.907879	0.042399
GOLGA5	TC1400008019.hg.1	6.30141	5.93158	5.8188	6.88111	7.24547	6.64829	0.907695	0.0170774
KNTC1	TC1200009209.hg.1	7.89577	7.22738	7.2588	8.10267	8.61	8.39072	0.907147	0.0319776
NBR1	TC1700007942.hg.1	7.31118	7.12821	7.63534	8.1359	8.39792	8.26023	0.906437	0.0124242
EXO1	TC0100012172.hg.1	9.23872	9.27427	9.43628	10.2677	10.6187	9.77988	0.905669	0.0576225
ZNF585B	TC1900011934.hg.1	8.06476	8.23744	8.69421	9.06001	9.37726	9.27558	0.905479	0.0239495
POLK	TC0500007808.hg.1	8.76671	7.13182	7.7823	8.96391	8.79586	8.63705	0.905329	0.193282
HAUS6	TC0900009645.hg.1	8.40293	7.99842	8.69173	9.07457	9.48456	9.2495	0.905183	0.0263951
CENPJ	TC1300008371.hg.1	6.25339	5.66632	6.05349	6.74868	6.95283	6.98631	0.904875	0.0212365
MYEF2	TC1500009336.hg.1	5.47992	4.05895	2.8285	4.85852	5.12391	5.09871	0.904593	0.358906
TOP1	TC2000007380.hg.1	9.55545	10.1436	9.40843	10.6595	10.7985	10.3624	0.904304	0.0360976
GPX7	TC0100008321.hg.1	5.02174	5.27575	5.23324	6.5681	5.58796	6.08605	0.903793	0.0763216
ANKRD6	TC0600008764.hg.1	4.53813	3.32026	3.62493	4.52259	5.10908	4.56246	0.903601	0.11592
SENP1	TC1200010566.hg.1	10.8985	11.0976	11.0806	11.636	12.1044	12.0468	0.903507	0.0143708
UBE3A	TC1500008751.hg.1	8.60984	7.82241	8.15801	9.07234	9.04789	9.17719	0.902388	0.0545295
VAMP4	TC0100016406.hg.1	6.83307	6.40655	7.19832	7.78078	7.73013	7.63401	0.902328	0.0542388
ZNF780B	TC1900011951.hg.1	4.78097	3.70096	5.19622	5.42437	4.94921	6.00978	0.901739	0.179896
RTF1	TC1500007004.hg.1	10.6553	10.6288	10.7132	11.7851	11.3891	11.5241	0.900327	0.0132124
CCDC88A	TC0200012643.hg.1	7.85624	7.76987	7.27789	8.31893	8.46053	8.82514	0.900199	0.0196631
HAVCR1	TC0500012588.hg.1	4.39204	5.41175	5.1415	5.72805	5.80817	6.10724	0.899389	0.0838831
ZNF555	TC1900006602.hg.1	6.76105	7.03159	7.34125	8.07882	7.62336	8.12839	0.898891	0.0180398
RGPD3	TC0200013772.hg.1	3.83142	4.08847	4.59928	4.67646	5.16989	5.36841	0.898531	0.0427241
MYEF2	TC1500009335.hg.1	8.96083	8.86809	9.67037	10.198	9.92014	10.0693	0.896041	0.0602954
PRKCI	TC0300009468.hg.1	9.72481	9.05875	9.56509	10.1834	10.3454	10.5079	0.89604	0.0303167
BCHE	TC0300013025.hg.1	3.09727	6.42359	4.4782	5.45031	5.37601	5.85977	0.895675	0.451961
C18orf54	TC1800007355.hg.1	5.21945	4.55387	5.06573	5.77644	6.01284	5.73601	0.895414	0.0319533
SLC25A36	TC0300008989.hg.1	8.18266	8.16252	8.2577	8.80926	9.32259	9.15623	0.895066	0.0240055
VPS13B	TC0800008352.hg.1	9.64013	9.60812	9.7296	10.6802	10.3373	10.6424	0.894003	0.00873815
POU5F1	TC0600011406.hg.1	3.28862	3.54971	3.531	4.74118	4.17263	4.13603	0.893506	0.0301076
RRM1	TC1100006644.hg.1	12.3824	12.4509	12.7552	13.4866	13.4355	13.3466	0.893427	0.00939721
SCN8A	TC1200007641.hg.1	4.79524	5.21743	4.8644	5.83669	6.07648	5.64223	0.89278	0.00793496
CNOT1	TC1600010490.hg.1	11.7141	12.2117	11.9598	12.7796	12.9429	12.8396	0.892167	0.0170442
ARPP21	TC0300007014.hg.1	6.90087	5.54735	6.19625	7.18335	7.35853	6.77803	0.891813	0.136297
NSF	TC1700008104.hg.1	6.63078	7.66066	7.63376	7.98286	8.46973	8.14803	0.891807	0.103662
ZFC3H1	TC1200011255.hg.1	8.4541	7.22439	7.58403	8.39625	8.83845	8.7007	0.890958	0.122509
TRANK1	TC0300010714.hg.1	6.86451	6.13767	6.97335	7.55315	7.57393	7.51987	0.890473	0.0763776
PTPRN	TC0200015773.hg.1	3.88007	4.1219	3.83544	5.17743	4.70242	4.62712	0.889853	0.0194838
HOMER1	TC0500011240.hg.1	7.46707	7.68607	7.56407	8.44818	8.59411	8.34245	0.889175	0.000848574
ECT2	TC0300009524.hg.1	7.18879	7.62957	7.56635	7.78961	8.69551	8.56543	0.888616	0.0691917
ANKRD20A5P	TC1800009218.hg.1	6.69056	6.60674	6.64208	7.63019	7.2319	7.74297	0.888557	0.0267066
LRRC40	TC0100014562.hg.1	6.242	6.78094	6.40899	7.54652	7.63347	6.91626	0.888109	0.0378716
CENPU	TC0400012620.hg.1	6.89565	7.45447	7.49549	7.84075	8.56686	8.09868	0.886893	0.0371487
ZNF652	TC1700011038.hg.1	9.02967	9.68569	9.46794	10.257	10.3013	10.2838	0.88626	0.0437025
GABRB3	TC1500008772.hg.1	7.05557	6.82976	7.30255	8.09361	7.96907	7.7829	0.885904	0.00841245
PAXBP1	TC2100007967.hg.1	7.86034	8.31591	8.59329	8.92123	9.05966	9.44612	0.885823	0.0327883
HIST1H2BJ	TC0600011184.hg.1	12.2803	12.9718	12.9954	13.4563	13.8995	13.5482	0.885497	0.0426665
ITGA6	TC0200009973.hg.1	7.13495	6.62552	7.15523	7.93678	8.13344	7.50186	0.885459	0.0256414
PIK3CB	TC0300014053.hg.1	6.15246	6.63288	6.55814	7.29601	7.18968	7.51244	0.884885	0.0114008
CCDC47	TC1700012446.hg.1	10.7386	10.4143	10.9141	11.1682	11.9566	11.5965	0.88476	0.0389763
TAS2R30	TC1200012763.hg.1	4.28161	3.46272	3.97317	4.47554	5.4862	4.40902	0.884415	0.113438
RRM2B	TC0800011312.hg.1	5.74754	5.96757	6.217	7.08896	7.01533	6.48088	0.884353	0.0237281
USP44	TC1200011588.hg.1	9.04119	9.26771	9.17098	9.88773	10.2102	10.0342	0.884075	0.00228845
NOP58	TC0200010480.hg.1	9.40118	9.73783	9.82403	10.6526	10.337	10.6227	0.883115	0.00670949
RHOBTB1	TC1000010737.hg.1	4.94482	5.15508	5.20015	5.75834	6.10316	6.08655	0.882664	0.00433612
TMEM132D	TC1200012424.hg.1	3.59719	3.56658	4.2472	4.37543	5.05605	4.62565	0.882056	0.04216
YTHDC1	TC0400010904.hg.1	8.34604	7.73904	8.267	8.95106	9.15456	8.89211	0.881879	0.0295268
DBT	TC0100015061.hg.1	6.56894	5.92974	6.32637	7.17634	7.2596	7.03352	0.881471	0.0306488
GOLGA8N	TC1500010712.hg.1	3.79148	3.83588	3.72369	4.60318	4.36851	5.02285	0.881164	0.0407032
ZSCAN26	TC0600014088.hg.1	6.53874	5.61891	6.35772	6.79672	7.1022	7.25992	0.881159	0.0698078
KIF5B	TC1000010249.hg.1	8.30644	8.4171	8.22537	9.45511	8.98534	9.14979	0.880446	0.013666
HPGD	TC0400012458.hg.1	4.02909	3.89175	4.54701	5.27221	5.42213	4.41437	0.880287	0.0888333
MACF1	TC0100007898.hg.1	8.98418	8.80661	8.59712	9.78759	9.31015	9.92885	0.879555	0.0233103
IQGAP2	TC0500007826.hg.1	5.9508	6.18531	6.26935	6.83345	6.98687	7.22308	0.87931	0.00441696
LRRC8C	TC0100018246.hg.1	8.53663	8.58451	8.34349	9.57262	9.63996	8.88523	0.877724	0.0573783
CUL4B	TC0X00010675.hg.1	9.06969	7.88905	8.53938	9.26295	9.45703	9.41018	0.877344	0.120023
YWHAEP7	TC1700010507.hg.1	5.62492	6.97094	7.05262	7.31473	7.29146	7.67062	0.87611	0.193053
BROX	TC0100011695.hg.1	7.84324	8.42568	7.87336	8.93638	8.9734	8.86056	0.876021	0.0401209
PPWD1	TC0500007604.hg.1	8.472	8.54152	8.81358	9.42597	9.49042	9.53814	0.875808	0.0088617
BOD1L1	TC0400010085.hg.1	5.46512	4.67485	5.48837	6.24055	5.64954	6.36513	0.875625	0.0671891
NR2C2	TC0300006696.hg.1	4.87749	4.13146	5.82014	5.33122	5.83258	6.292	0.87557	0.212266
MMS22L	TC0600012631.hg.1	10.3174	10.3336	10.3978	11.0767	11.2889	11.3098	0.87557	0.00380206
FASTKD1	TC0200014857.hg.1	7.89099	7.62415	7.40807	8.34281	8.55822	8.64741	0.875074	0.00951344
ADD3	TC1000008875.hg.1	5.68635	6.15346	4.84098	6.56253	6.65535	6.08784	0.87498	0.136447
PSIP1	TC0900009592.hg.1	8.55446	8.33302	8.32853	8.98167	9.39716	9.46136	0.874727	0.0145812
HIST1H1C	TC0600011127.hg.1	11.4762	11.6545	12.3065	12.4968	12.9003	12.6637	0.87455	0.0559399
PDZD8	TC1000011948.hg.1	8.1231	7.8703	7.89988	8.53773	9.02431	8.95165	0.873468	0.0142294
CENPF	TC0100011581.hg.1	5.71454	5.85794	6.34588	6.82531	7.00116	6.71138	0.873158	0.0295121
SLC4A7	TC0300010561.hg.1	10.2205	10.1958	10.4225	11.2197	11.1767	11.0611	0.87291	0.00107117
POLD1	TC1900011787.hg.1	3.76702	5.0994	5.54692	5.95979	5.66297	5.40621	0.871875	0.239891
DIAPH2	TC0X00007889.hg.1	6.09282	5.37491	6.20914	7.10255	6.48201	6.70717	0.871618	0.0586839
SOS1	TC0200012307.hg.1	8.65245	7.82373	8.2988	9.58091	8.65523	9.15226	0.87114	0.0732034
C5orf22	TC0500007048.hg.1	8.29876	8.32161	8.44594	9.01914	9.50292	9.15643	0.870725	0.0186221
BAZ1A	TC1400008921.hg.1	7.11901	6.56725	7.39874	7.98019	7.94884	7.76814	0.870723	0.0617633
CEP57	TC1100008847.hg.1	9.43113	9.0964	9.69834	9.86	10.7204	10.257	0.870499	0.0519525
COPS2	TC1500009363.hg.1	7.50321	6.88379	7.05281	7.74131	7.90329	8.40665	0.870483	0.0334063
CTDSPL2	TC1500007091.hg.1	9.25262	9.55262	9.68011	10.3093	10.4365	10.3496	0.870015	0.0145874
ARHGEF12	TC1100009287.hg.1	5.2235	5.36016	5.34239	6.16453	5.90296	6.4682	0.869878	0.0270619
TAOK3	TC1200012111.hg.1	8.1387	9.0981	8.93688	9.58754	9.78163	9.41365	0.869712	0.0858126
BRD7	TC1600010262.hg.1	10.3608	10.3351	10.5162	11.3654	11.4098	11.0456	0.869547	0.00709876
LSAMP	TC0300012073.hg.1	8.30104	8.38736	8.13517	9.0869	9.11435	9.22862	0.868768	0.00148289
C9	TC0500013300.hg.1	6.67817	5.4792	6.38284	7.0185	7.04502	7.08189	0.868402	0.137368
SASS6	TC0100015058.hg.1	7.99406	8.02888	7.10442	8.21819	8.63634	8.87738	0.868184	0.0841646
MATR3	TC0500008810.hg.1	11.7748	11.3924	11.2504	12.1796	12.4023	12.4381	0.867457	0.0161277
ARAP2	TC0400012917.hg.1	4.24522	2.69203	3.12189	4.3216	3.66363	4.67475	0.866947	0.202133
TFAP2C	TC2000007830.hg.1	6.16553	5.75703	5.64868	6.65713	6.71176	6.80282	0.866827	0.0248945
ZNF888	TC1900011318.hg.1	4.94124	4.89936	5.2205	5.42679	6.06295	6.17163	0.866755	0.0482405
SMG1	TC1600009620.hg.1	12.5291	13.024	13.0337	13.6375	13.9051	13.6441	0.86664	0.0188076
ZNF611	TC1900011312.hg.1	9.69816	8.79112	9.42478	10.0529	10.288	10.1722	0.866337	0.0762311
SLC40A1	TC0200015211.hg.1	8.57306	8.58329	8.93463	9.45179	9.87088	9.36486	0.865513	0.0135233
SCAI	TC0900012276.hg.1	8.95634	8.3276	8.89347	9.57254	9.6957	9.50508	0.86531	0.0411063
ARRB1	TC1100011643.hg.1	4.08292	4.06004	3.79286	5.01091	4.84916	4.67097	0.865077	0.00310153
RBM3	TC0X00007195.hg.1	12.0269	11.784	12.0023	12.638	13.2063	12.5638	0.864927	0.0375763
MSH3	TC0500007919.hg.1	5.93168	6.24285	6.84969	7.00471	7.30134	7.31244	0.864753	0.0706098
TCERG1	TC0500009009.hg.1	10.6489	9.78856	10.3909	10.9461	11.1589	11.3172	0.86462	0.0604858
SHTN1	TC1000011938.hg.1	9.40492	9.25313	9.23907	10.1855	9.87699	10.425	0.863456	0.0229591
RASA3	TSUnmapped00000531.hg.1	5.57291	5.47595	5.99059	6.6745	6.61662	6.33775	0.863141	0.0143729
CCDC82	TC1100012052.hg.1	6.30792	7.32651	7.44359	8.23419	7.89992	7.52937	0.861816	0.124336
AASDH	TC0400010768.hg.1	4.98865	5.22554	5.19651	5.32517	5.84709	6.82279	0.861445	0.185648
PGGT1B	TC0500013348.hg.1	5.61367	4.71984	5.90682	6.45874	6.10308	6.25939	0.860294	0.128494
ZNF397	TC1800007071.hg.1	6.13302	6.08231	6.93641	7.15304	7.20597	7.37193	0.859733	0.0825744
ST8SIA4	TC0500011579.hg.1	9.7911	9.35194	9.93658	10.605	10.5034	10.5487	0.859161	0.0362645
TOPBP1	TC0300012475.hg.1	8.81281	8.40577	9.0772	9.53774	9.24486	10.0905	0.859122	0.0560277
SPDYE5	TC0700008063.hg.1	4.48351	3.64152	4.31944	4.6514	5.02782	5.34178	0.858843	0.0616103
ZNF431	TC1900007512.hg.1	8.21054	7.6462	8.00501	8.92991	8.8616	8.64616	0.858641	0.0190185
KPNA2	TC1700008719.hg.1	12.5365	12.7345	12.5216	13.4917	13.589	13.2874	0.858477	0.0020133
UTRN	TC0600009712.hg.1	5.34983	4.78024	5.78504	6.36541	6.19434	5.93019	0.858273	0.0813679
EDEM1	TC0300006491.hg.1	11.8021	11.6022	12.2323	12.5531	12.9057	12.7512	0.85784	0.0254861
RAD17	TC0500007673.hg.1	8.65287	8.6478	9.15389	9.58404	9.96551	9.47753	0.857509	0.0191501
TUBB4B	TC0900009274.hg.1	12.5975	12.6471	12.6526	13.5367	13.7209	13.2106	0.85701	0.0276093
PPP3CA	TC0400011440.hg.1	8.89439	8.54092	9.03839	9.68918	9.42199	9.9328	0.856754	0.0148154
CENPQ	TC0600008209.hg.1	5.05589	4.6053	4.64759	5.16998	5.54499	6.16296	0.856388	0.0789783
FAM217B	TC2000007942.hg.1	8.90883	8.84396	8.56223	9.57166	9.9576	9.35439	0.856212	0.0211734
MYO1B	TC0200010284.hg.1	7.4561	6.96994	7.78704	7.839	8.83496	8.1073	0.856062	0.0910135
PRPF38B	TC0100009328.hg.1	7.01751	6.61815	7.156	7.50974	7.93559	7.91399	0.855886	0.0164971
FAM72C	TC0100015550.hg.1	13.0755	12.7258	12.6938	13.605	13.7529	13.7046	0.85577	0.0122113
EIF1AY	TC0Y00006730.hg.1	4.55205	5.66437	5.49722	5.7739	6.65098	5.85495	0.855397	0.130215
PARN	TC1600009482.hg.1	9.24228	9.53787	9.70963	10.5406	10.2875	10.2267	0.855028	0.00914062
C15orf48	TC1500010733.hg.1	3.54279	3.06737	3.55682	4.83441	3.65208	4.24378	0.854431	0.113233
GTDC1	TC0200014509.hg.1	6.38703	6.51001	6.60255	7.70446	7.12785	7.22923	0.853983	0.0297283
ALG11	TC1300007237.hg.1	5.29694	5.27961	4.89045	6.25195	5.94131	5.83147	0.85258	0.00964849
GOLGA8B	TC1500008995.hg.1	7.11106	6.72528	7.37983	8.00276	8.16473	7.60493	0.852083	0.028669
CD164	TC0600012814.hg.1	10.8761	10.3111	11.0592	11.1733	11.9339	11.6938	0.85156	0.0553187
HSDL2	TC0900008463.hg.1	6.76505	7.07963	7.64402	8.53703	7.82807	7.67794	0.851446	0.0824233
DDHD1	TC1400009198.hg.1	5.70929	5.46902	5.91114	6.69027	6.61389	6.33911	0.851272	0.00751956
NF1	TC1700007478.hg.1	9.43086	9.43101	9.11404	10.2217	10.2006	10.1072	0.851181	0.00925204
MASTL	TC1000007092.hg.1	6.54377	6.77257	7.29783	7.69112	7.79486	7.6809	0.850904	0.0589654
FBXO15	TC1800009026.hg.1	2.76325	3.77168	4.34605	4.28698	4.67081	4.47424	0.85035	0.202642
ARMC2	TC0600009076.hg.1	4.90195	5.12787	6.04882	6.20751	6.29637	6.12532	0.850186	0.133645
ATXN3	TC1400010780.hg.1	6.75425	7.94418	7.67862	8.40886	8.39624	8.12144	0.849828	0.134972
ZNF274	TC1900009031.hg.1	3.6141	3.45914	3.21275	3.90516	4.4518	4.47683	0.849267	0.0250785
GEN1	TC0200006833.hg.1	6.16575	5.31822	6.52375	7.15574	6.54461	6.85412	0.848918	0.125522
RSF1	TC1100011723.hg.1	6.06188	6.25537	6.5275	7.60424	6.63819	7.14718	0.848285	0.0746104
FAM206A	TC0900008380.hg.1	7.74332	7.53244	8.07123	8.30782	8.92848	8.65504	0.848117	0.0243547
XYLB	TC0300013807.hg.1	8.06113	8.38176	7.96406	8.95168	9.279	8.71804	0.84726	0.0165792
ZBTB10	TC0800008062.hg.1	7.93786	8.52507	8.04791	9.03203	9.10581	8.91294	0.846642	0.0330726
ZNF266	TC1900009583.hg.1	7.5309	7.73342	7.72583	8.35199	8.37097	8.80706	0.84663	0.0168482
MDM1	TC1200011181.hg.1	5.22516	5.38621	5.41177	6.02385	6.35088	6.18705	0.846212	0.00320284
GFPT1	TC0200012956.hg.1	10.5496	9.96958	10.6661	11.4149	11.031	11.2776	0.846082	0.0397069
YTHDF3	TC0800007809.hg.1	12.3361	12.205	12.4679	13.0574	13.2938	13.1959	0.84606	0.00121917
ZNF184	TC0600011197.hg.1	7.17782	7.89183	7.69083	8.3306	8.46767	8.50021	0.846002	0.0506894
NCOA7	TC0600009365.hg.1	4.85524	5.15187	4.82073	5.90154	5.53142	5.92616	0.843763	0.00767807
CUL2	TC1000010310.hg.1	6.54969	6.88879	6.96746	7.83659	7.54918	7.55124	0.843685	0.00766917
ASB18	TC0200016161.hg.1	3.93123	3.8733	3.75298	4.45856	4.42015	5.20947	0.843551	0.0760927
TRMT10C	TC0300008171.hg.1	6.42314	5.08346	6.56673	6.80354	6.42654	7.37092	0.842558	0.214728
FAM118A	TC2200007614.hg.1	9.37176	9.06649	9.34947	9.87745	10.3351	10.1027	0.842514	0.00852483
RAB23	TC0600012132.hg.1	6.72282	4.84122	6.30939	6.35197	7.28566	6.76277	0.842326	0.278801
SLC35F5	TC0200013943.hg.1	7.19858	7.28071	7.76156	8.66206	8.14316	7.96218	0.84218	0.0385024
WDR36	TC0500008308.hg.1	8.45162	8.41857	8.41403	8.99219	9.54058	9.27794	0.842162	0.032967
SFN	TC0100007486.hg.1	6.12505	6.50781	6.75116	7.12473	7.1894	7.59583	0.841982	0.0246321
CDCA3	TC1200009759.hg.1	7.44046	7.33187	7.26928	8.36873	8.1774	8.01831	0.840943	0.00550153
IGF2BP3	TC0700010463.hg.1	7.59208	7.60178	8.37128	8.42272	8.30503	9.35961	0.84074	0.121487
KIAA1586	TC0600008346.hg.1	8.67383	8.67348	8.39744	9.32361	9.67072	9.26968	0.839749	0.00731394
AQR	TC1500009004.hg.1	7.23734	6.48101	7.13654	7.86478	7.73221	7.77449	0.838864	0.0677862
GOLGA8O	TC1500008933.hg.1	4.57982	4.05167	4.24969	4.90233	4.96067	5.53349	0.838432	0.0328222
BUB1B	TC1500010715.hg.1	9.64753	9.40947	9.96323	10.4482	10.8153	10.2707	0.83802	0.0209257
SLCO4C1	TC0500011596.hg.1	8.50473	8.41979	8.33482	9.33477	9.14947	9.28868	0.837856	0.00038246
CAPRIN1	TC1100007247.hg.1	14.5069	14.5099	14.4465	15.0927	15.5392	15.3429	0.837183	0.0207845
NUFIP1	TC1300008809.hg.1	7.91963	8.13158	7.97221	9.13366	8.68188	8.71804	0.836718	0.0164732
MTF2	TC0100009054.hg.1	9.29495	8.94144	9.53351	10.1113	9.97591	10.1919	0.836398	0.0282715
ZKSCAN8	TC0600007402.hg.1	9.03379	9.17352	8.75594	9.70091	9.70555	10.0656	0.836273	0.00830606
CEP78	TC0900007663.hg.1	8.0442	7.75217	7.93961	8.72368	8.86246	8.65853	0.836234	0.00205231
FYTTD1	TC0300010066.hg.1	9.97921	9.80328	9.933	10.6376	11.0735	10.5102	0.835268	0.0303159
SPG11	TC1500009261.hg.1	6.00516	5.78312	6.66522	6.539	7.60941	6.81062	0.835175	0.117906
PRKD3	TC0200012261.hg.1	5.77822	5.7246	6.46783	6.19316	7.3455	6.93708	0.835032	0.121274
EIF3E	TC0800012451.hg.1	13.0412	12.6828	12.8792	13.6813	13.7881	13.6383	0.83486	0.00711843
SH2D1A	TC0X00008344.hg.1	11.4241	11.0721	11.3619	11.875	12.2983	12.189	0.834697	0.00796694
UBE4A	TC1100009203.hg.1	10.5476	10.1731	10.4383	11.2369	11.1677	11.2552	0.833597	0.0134991
ITGA4	TC0200010157.hg.1	9.3251	9.04865	8.86909	9.62399	10.2009	9.91784	0.8333	0.0190283
HIST1H4I	TC0600014084.hg.1	10.9742	11.2324	11.8051	12.1824	12.1831	12.1456	0.833137	0.0765774
MTM1	TC0X00008716.hg.1	3.98396	4.91039	4.23547	5.24319	4.90599	5.47894	0.832765	0.0747431
PRKCQ	TC1000009714.hg.1	10.5739	10.7061	11.0264	11.5192	11.6413	11.6432	0.832463	0.0180498
CRKL	TC2200008062.hg.1	5.15037	4.28976	5.62094	6.12698	5.80088	5.63015	0.832313	0.155312
SMC1B	TC2200008974.hg.1	5.95452	5.85248	6.57632	6.4453	7.25537	7.17907	0.83214	0.0735624
TRAPPC11	TC0400009467.hg.1	7.9524	7.77858	7.84286	8.49736	8.91113	8.66175	0.832132	0.0107664
KMT2E	TC0700008690.hg.1	8.54856	9.02622	8.9384	9.66417	9.70705	9.6369	0.831644	0.0278258
TRIM33	TC0100015346.hg.1	8.42531	8.2346	8.21386	9.17771	8.90743	9.28343	0.8316	0.00597394
PRKAR1A	TC1700012297.hg.1	8.05121	8.57542	8.15712	9.09979	9.43794	8.73847	0.830819	0.0345836
GPR155	TC0200014991.hg.1	4.01912	4.53974	3.67282	4.57597	5.36084	4.78729	0.830808	0.0735703
EDEM3	TC0100016676.hg.1	7.59099	7.13486	7.51973	8.40437	8.36916	7.96247	0.830136	0.0143579
POTEJ	TC0200009312.hg.1	6.48192	6.57858	6.35507	6.76348	7.58296	7.55741	0.829427	0.0836999
CAB39	TC0200011034.hg.1	9.06137	9.02574	8.83476	9.88914	9.93082	9.58939	0.829159	0.00488264
TRIM59	TC0300014075.hg.1	9.12746	7.98349	7.95815	9.3333	8.98445	9.23868	0.82911	0.15719
ZNF212	TC0700009608.hg.1	4.89473	5.80927	5.67643	6.37826	5.94687	6.54092	0.828541	0.081593
STT3B	TC0300006942.hg.1	13.9958	13.3039	13.4949	14.3895	14.5454	14.3448	0.82839	0.0472828
RGPD5	TC0200013902.hg.1	8.62861	7.73505	8.36162	9.05418	9.21082	8.94478	0.828163	0.0787837
TTC37	TC0500011490.hg.1	4.54953	4.91269	4.81456	5.5734	5.48282	5.70451	0.827979	0.00557211
NOC3L	TC1000011469.hg.1	4.86573	4.32226	5.46502	5.52609	5.85482	5.75479	0.827563	0.119362
IBTK	TC0600012413.hg.1	8.18331	8.23828	7.92909	9.16161	8.77128	8.89951	0.827241	0.00571362
PGM2L1	TC1100011611.hg.1	4.4494	3.80866	4.77487	5.02945	5.29792	5.18691	0.827124	0.0912428
FRYL	TC0400010626.hg.1	4.52191	3.61767	5.06963	5.04166	5.16717	5.4809	0.826842	0.182423
BAZ1B	TC0700011493.hg.1	10.3286	10.3156	10.1303	11.0592	10.9618	11.2317	0.826017	0.00148628
MTRF1	TC1300008720.hg.1	8.8256	9.05503	8.96677	9.80575	9.79769	9.72171	0.825914	0.00257402
ZCWPW1	TC0700011998.hg.1	3.30846	3.16758	3.22333	4.0573	4.33566	3.78068	0.82476	0.0293863
PPIAL4F	TC0100009715.hg.1	9.5554	9.96669	10.4419	10.8398	10.4832	11.1152	0.824723	0.0651014
CASC5	TC1500006963.hg.1	6.81428	6.21497	6.0452	6.89594	7.48686	7.1652	0.824518	0.0513155
BTAF1	TC1000008452.hg.1	8.50683	8.5791	8.61297	9.61509	9.18285	9.37343	0.824152	0.0174796
HIST2H3A	TC0100009877.hg.1	13.5219	14.0995	14.2107	14.6954	15.191	14.4164	0.823563	0.0574235
MANEA	TC0600008863.hg.1	7.20069	8.20273	7.95378	8.23889	8.79038	8.79157	0.821209	0.0942597
TMX4	TC2000008345.hg.1	8.11869	7.91028	7.9386	8.79936	8.89804	8.73368	0.821172	0.000816996
ATF2	TC0200015009.hg.1	11.1308	10.8632	10.9269	11.786	11.859	11.7382	0.820783	0.00377947
RSC1A1	TC0100006991.hg.1	7.54928	8.14166	8.29044	8.64093	8.93929	8.86268	0.820507	0.0533114
GLMN	TC0100014921.hg.1	4.36726	4.03918	4.59462	4.60526	5.5949	5.26238	0.820491	0.0868749
TLK1	TC0200014893.hg.1	8.52231	7.95792	6.41824	8.45544	8.55851	8.34558	0.820351	0.321599
RNGTT	TC0600012529.hg.1	8.64264	8.84758	9.36915	9.67982	9.77267	9.86147	0.818197	0.0561982
ALKBH8	TC1100012209.hg.1	5.53015	5.23583	5.35154	6.33504	5.83553	6.39992	0.817653	0.0278682
VPS13D	TC0100006884.hg.1	4.12622	4.68452	4.8421	5.26858	5.22552	5.60956	0.816944	0.0433685
KIAA0430	TC1600009530.hg.1	7.64942	7.83042	7.99706	8.93104	8.37661	8.61955	0.816766	0.0181677
CSE1L	TC2000007627.hg.1	9.70417	9.92722	9.83796	10.5705	10.8092	10.5397	0.816702	0.00207757
DEPTOR	TC0800008674.hg.1	3.10958	3.73008	2.78798	3.62736	4.3077	4.14233	0.816585	0.0820645
KIAA0196	TC0800011731.hg.1	8.95058	8.56666	9.41254	9.79175	9.75125	9.83504	0.816087	0.0778608
PDS5A	TC0400010484.hg.1	9.70933	9.15088	9.37811	10.1275	10.0865	10.4724	0.816026	0.0183429
AKAP7	TC0600009446.hg.1	3.84454	3.90653	3.89268	4.55993	4.63004	4.89982	0.815343	0.0135385
HSPA4	TC0500008664.hg.1	9.87286	10.0841	10.2233	10.7867	10.9216	10.9141	0.814043	0.00727111
TATDN1	TC0800011710.hg.1	7.4433	8.252	7.6739	8.69709	8.74397	8.36399	0.811947	0.0583309
PIK3CB	TC0300014054.hg.1	5.47748	4.74898	4.53303	5.67481	5.05414	6.4662	0.811888	0.187091
LHX4-AS1	TC0100018539.hg.1	5.56138	4.89929	5.55245	5.71544	5.94851	6.78458	0.811802	0.116598
CHST11	TC1200008685.hg.1	6.21439	5.43496	6.32487	7.04946	7.05232	6.30783	0.811798	0.0966828
NSD1	TC0500009610.hg.1	7.27774	7.61193	8.25188	8.32835	8.63612	8.61178	0.811567	0.0921214
ARHGAP27	TC1700010888.hg.1	4.42507	4.63068	4.39818	5.01079	5.33897	5.53884	0.811557	0.0195324
UGGT1	TC0200009239.hg.1	11.0824	10.7645	10.6158	11.6753	11.6566	11.5653	0.811523	0.0223043
SHOC2	TC1000008908.hg.1	7.4856	8.6962	7.9258	8.99679	8.97824	8.56505	0.810825	0.136149
TRAPPC6B	TC1400009006.hg.1	8.92621	8.69076	8.84227	9.55336	9.86397	9.47094	0.809677	0.00827929
ARMC1	TC0800010663.hg.1	10.1385	9.57904	10.222	10.8132	10.9949	10.5576	0.808733	0.0358315
RFX7	TC1500009514.hg.1	9.3589	9.83423	9.43175	10.4283	10.2122	10.4102	0.808603	0.0179942
ADAM22	TC0700008265.hg.1	8.41871	7.78908	8.84941	9.00911	9.36807	9.10466	0.808217	0.107159
RHOBTB3	TC0500008125.hg.1	3.93485	4.13669	4.21391	4.70438	5.02298	4.98059	0.807501	0.00380031
CIT	TC1200012143.hg.1	6.92405	7.14063	7.05927	7.64409	7.73536	8.16579	0.807096	0.0252335
INTS2	TC1700011366.hg.1	7.20617	6.54697	7.61733	7.73926	7.99756	8.053	0.806449	0.112019
RPS27A	TC0200007628.hg.1	14.1734	14.2567	14.6943	15.0723	15.2632	15.2075	0.80623	0.02727
PNPT1	TC0200012652.hg.1	8.62718	8.67854	8.73964	9.19736	9.71076	9.55509	0.805949	0.0292234
GOPC	TC0600014337.hg.1	10.034	9.42905	9.38551	10.5224	10.3444	10.3989	0.805718	0.0538164
KIF2C	TC0100008101.hg.1	9.72758	9.48084	9.57904	10.1156	10.4886	10.5994	0.805378	0.0170883
IFI27	TC1400008056.hg.1	3.80271	4.27418	3.85969	4.37304	5.23364	4.74586	0.805322	0.0629478
DZIP3	TC0300008289.hg.1	7.02121	7.37856	7.78523	8.74692	7.60041	8.25295	0.805098	0.124061
USP48	TC0100013226.hg.1	8.47985	8.68629	8.68565	9.73771	9.77217	8.75698	0.805023	0.13146
SPEN	TC0100007006.hg.1	9.25568	9.30337	9.02422	10.1323	9.93771	9.92337	0.80337	0.00227796
KCNA3	TC0100015246.hg.1	8.87514	8.85792	9.12902	9.69075	9.73211	9.84926	0.803348	0.00361917
ZNF714	TC1900007511.hg.1	7.47637	7.58838	7.81301	7.8655	8.47405	8.94772	0.803171	0.113575
KIR2DS5	TC1900008879.hg.1	3.94918	3.81037	3.37955	4.83633	3.74297	4.96752	0.802572	0.163195
MACC1	TC0700013524.hg.1	4.02402	4.35054	5.14041	5.18629	5.75868	4.97771	0.80257	0.126803
ZNF780A	TSUnmapped00000038.hg.1	4.96286	3.96759	3.9673	5.20363	5.505	4.59562	0.80217	0.136146
RIOK1	TC0600006864.hg.1	8.91925	8.78246	9.04534	9.37686	9.77133	10.004	0.801715	0.0337978
SHCBP1	TC1600010168.hg.1	8.46608	8.88082	9.20464	9.64568	9.85023	9.45979	0.801385	0.0444614
C18orf21	TC1800007089.hg.1	5.27539	6.06149	6.08064	6.24185	6.7716	6.80794	0.801291	0.0756548
RNF170	TC0800010299.hg.1	6.75877	6.7425	7.60197	7.99789	7.34911	8.15997	0.801244	0.101822
ZNF12	TC0700010216.hg.1	4.53474	4.37211	5.1276	4.98691	5.64352	5.80742	0.801138	0.0784377
ZNF235	TC1900010886.hg.1	6.36372	6.4998	7.34092	7.3702	7.7779	7.45909	0.800916	0.105106
RORA	TC1500009641.hg.1	6.7078	6.60725	7.27794	7.90358	7.6066	7.48239	0.79986	0.0407699
CCSAP	TC0100017661.hg.1	6.33019	5.66295	6.05081	6.92373	6.57867	6.94023	0.799558	0.0331024
TRAPPC8	TC1800008405.hg.1	6.35257	6.60291	6.44337	7.6656	7.55138	6.57933	0.799155	0.140897
VPS41	TC0700010796.hg.1	8.74149	8.35461	8.56885	9.60866	8.88818	9.56456	0.798815	0.0568828
STAG1	TC0300012534.hg.1	7.14118	6.94477	8.0428	7.85361	8.28647	8.38419	0.798508	0.126974
TSHR	TC1400007804.hg.1	9.78086	10.4106	9.96275	10.6659	11.1197	10.7624	0.797916	0.0302152
MAN1A2	TC0100009568.hg.1	9.34394	8.89461	8.99879	9.87688	9.80708	9.94424	0.796955	0.0209054
OXCT1	TC0500010600.hg.1	3.25601	3.58515	3.53712	3.62419	5.41975	3.72493	0.796865	0.303578
PPP1R12B	TC0100011219.hg.1	4.27874	4.2848	6.06328	5.54015	6.28614	5.18935	0.79627	0.321632
HINT3	TC0600009368.hg.1	7.40784	7.77487	7.56485	8.10093	8.87472	8.15546	0.794517	0.0692108
PRKRIR	TC1100011684.hg.1	8.98615	9.29125	9.61713	9.98502	10.3554	9.93434	0.793425	0.0283145
ZNF345	TC1900007955.hg.1	5.07206	5.7454	5.0461	6.16074	5.6961	6.38668	0.793316	0.0614341
OR3A1	TC1700009476.hg.1	4.77133	3.94855	4.68955	5.11584	5.26498	5.40634	0.792574	0.0823252
TTBK2	TC1500009200.hg.1	6.69295	6.2157	6.39887	7.3683	7.27844	7.03789	0.792368	0.0123508
ZNF626	TC1900011916.hg.1	8.36187	8.78832	8.0127	9.00995	9.16031	9.36945	0.792275	0.0534708
POGZ	TC0100015793.hg.1	4.31981	4.80854	4.13183	5.84145	5.62434	4.1708	0.792138	0.267147
KRBOX4	TC0X00007107.hg.1	7.52038	7.46049	7.08116	8.17798	8.11009	8.14934	0.791798	0.0268437
IFIT5	TC1000008401.hg.1	5.42947	5.07177	4.91296	5.57256	5.93457	6.28243	0.791787	0.0403409
SMC4	TC0300009337.hg.1	12.2359	11.5653	12.0121	12.7723	12.8372	12.579	0.791773	0.042381
OSBPL11	TC0300012255.hg.1	7.6441	6.58537	6.72919	7.58179	7.95915	7.79278	0.791689	0.128762
C11orf57	TC1100009049.hg.1	7.89164	7.83122	8.31188	8.74765	8.80781	8.85253	0.791082	0.0305045
SNIP1	TC0100013747.hg.1	7.26809	6.95972	7.45476	7.75763	8.34107	7.95692	0.791017	0.0253313
ZNF160	TC1900011328.hg.1	14.3412	14.1837	14.4088	15.056	14.9236	15.3251	0.79033	0.00872445
STIL	TC0100018440.hg.1	9.22842	9.13568	9.30331	10.1787	9.77487	10.0832	0.789795	0.0134014
WDR35	TC0200011886.hg.1	4.1717	3.47799	4.1821	4.81153	5.06165	4.32496	0.788783	0.0684673
NUDT21	TC1600010407.hg.1	12.4472	12.3236	12.4052	12.8544	13.4991	13.1887	0.788737	0.0468826
ITCH	TC2000007184.hg.1	8.30595	8.32338	8.15264	9.20873	8.90729	9.03171	0.788584	0.00313361
UBXN4	TC0200009447.hg.1	10.8097	10.8827	10.6411	11.625	11.5515	11.5208	0.78791	0.00309537
SMARCA2	TC0900006473.hg.1	5.70337	5.95966	5.45022	6.34589	6.47803	6.65257	0.787746	0.0159177
NKX3-1	TC0800009885.hg.1	7.39266	7.94446	7.83925	8.25554	8.92988	8.35378	0.787609	0.0457723
KIF15	TSUnmapped00000127.hg.1	5.70216	5.43842	5.89419	6.24748	6.6146	6.53293	0.786745	0.0110925
EFCAB7	TC0100008588.hg.1	4.02872	3.5224	3.31198	3.85381	4.55325	4.81508	0.786349	0.0982077
XXbac-BPG154L12.4	TC0600007644.hg.1	2.41445	2.84149	3.08729	3.7262	3.51783	3.45806	0.786287	0.0418734
DUSP11	TC0200013079.hg.1	11.061	10.8219	10.9048	11.6168	11.9074	11.6221	0.786243	0.00368102
NGF	TC0100015368.hg.1	3.94342	3.90323	3.69178	4.65156	4.96831	4.27691	0.786119	0.0445625
ZNF81	TC0X00007158.hg.1	4.4672	5.32965	4.48455	5.24367	5.83056	5.55831	0.783716	0.0919573
TPMT	TC0600010960.hg.1	10.7995	10.3319	11.0457	11.3517	11.7921	11.383	0.783227	0.0431818
SDCBP2	TC2000009964.hg.1	3.15027	3.5196	3.5362	4.08939	3.89005	4.5758	0.783059	0.0401505
ZNF780A	TSUnmapped00000670.hg.1	5.21468	4.2729	5.33774	5.40567	5.96934	5.79903	0.782909	0.130566
KCNH8	TC0300006781.hg.1	4.5533	4.22319	4.79274	6.16524	5.22384	4.52839	0.782748	0.235407
ZNF138	TC0700013371.hg.1	7.4171	7.53468	6.80173	7.97857	7.89278	8.22582	0.781216	0.0579716
USP7	TC1600009326.hg.1	11.618	11.7101	12.0645	12.4619	12.8504	12.4238	0.781183	0.0154036
SFR1	TC1000008798.hg.1	10.2494	9.90444	10.4724	11.0008	11.1458	10.8226	0.780982	0.0235009
SLC25A46	TC0500008304.hg.1	10.9738	10.2205	11.2255	11.7708	11.5797	11.4121	0.780947	0.110476
FAM171B	TC0200010219.hg.1	3.51417	4.61643	4.63775	5.20466	4.77363	5.13264	0.780859	0.159715
PAPOLG	TC0200007702.hg.1	10.3255	9.63561	9.99615	10.8244	10.7144	10.7602	0.780572	0.0560848
PARP15	TC0300008559.hg.1	5.71017	5.6437	5.87442	6.88351	6.18818	6.49806	0.780493	0.0483932
NCAPH	TC0200008502.hg.1	10.7694	11.2597	11.2402	11.937	11.8043	11.8681	0.78005	0.0337983
TBC1D16	TC1700011956.hg.1	4.13161	4.28714	3.88865	4.6152	5.36558	4.66643	0.779936	0.0655664
KAT6B	TSUnmapped00000398.hg.1	6.95817	5.60147	6.3998	7.32069	6.98558	6.99266	0.779833	0.179234
DCP2	TC0500008342.hg.1	9.61966	9.12433	9.2241	9.91178	10.3374	10.0583	0.779765	0.0176253
HNRNPA2B1	TC0700010538.hg.1	13.2059	12.6255	13.2491	13.6171	13.8701	13.9316	0.779447	0.0424043
SIPA1L1	TC1400007595.hg.1	6.13218	5.91514	6.5086	6.9116	7.13623	6.84523	0.779047	0.0284612
HBS1L	TC0600013251.hg.1	9.51077	8.58651	9.03822	9.73427	10.0449	9.69285	0.778841	0.083975
TMEM27	TC0X00009129.hg.1	3.12083	3.1021	3.09656	4.71911	3.52845	3.40827	0.778777	0.203695
DUSP16	TSUnmapped00000481.hg.1	5.22773	4.75675	4.98907	5.93179	6.0619	5.31579	0.778648	0.0561905
VPS36	TC1300009013.hg.1	8.77609	8.83488	9.05512	9.80012	9.61013	9.59111	0.778424	0.00241362
RINL	TC1900010631.hg.1	5.53906	5.73867	5.86351	6.54559	6.43554	6.49465	0.77818	0.00870282
ESF1	TC2000008439.hg.1	5.94738	5.77137	5.49556	6.57807	6.56712	6.40317	0.778016	0.0157497
STRBP	TC0900011461.hg.1	6.76489	6.08926	6.79725	7.48851	7.40559	7.09114	0.777947	0.0578041
ZNF365	TC1000007776.hg.1	4.15551	3.85577	3.68834	4.35318	5.41745	4.26236	0.777793	0.160393
KDM1B	TC0600007103.hg.1	10.5786	10.2349	10.6293	11.2383	11.3166	11.2212	0.77773	0.0198456
RAB33B	TC0400008803.hg.1	8.60709	8.38304	8.84178	9.39292	9.58883	9.18278	0.777539	0.0121169
ZNF277	TC0700008818.hg.1	6.42641	6.54635	6.51754	7.26286	7.30881	7.24842	0.776599	0.000340341
NUP155	TC0500010515.hg.1	10.414	10.2929	10.2787	10.97	11.2848	11.0605	0.776587	0.00605685
QRSL1	TC0600008989.hg.1	7.58948	8.28931	8.28772	8.79186	8.84227	8.86169	0.776433	0.0783335
LRP6	TSUnmapped00000012.hg.1	4.04604	4.68182	4.03087	5.20358	4.77145	5.11287	0.776389	0.0471529
MAP3K8	TC1000007176.hg.1	5.16237	3.94883	3.89235	5.28875	5.11159	4.92961	0.775466	0.196806
LACTB2	TC0800010766.hg.1	7.07416	6.40628	8.538	8.12847	7.8221	8.39316	0.775097	0.343093
EPS15	TC0100014175.hg.1	8.86797	8.9656	8.77853	9.47568	9.63451	9.82703	0.775043	0.00635547
DPY19L3	TC1900007744.hg.1	6.43088	6.30656	6.89699	7.05674	7.39518	7.5066	0.774697	0.0294383
XRCC5	TC0200010728.hg.1	12.1271	11.8234	12.1034	12.8447	12.7986	12.7324	0.77395	0.0095595
TAF5	TC1000008769.hg.1	7.97696	8.43734	7.84137	8.94223	9.29968	8.33427	0.773506	0.0934353
MYO5A	TC1500009457.hg.1	5.21211	4.89924	5.3458	5.82245	6.03983	5.90968	0.771603	0.0149806
ACVR2B	TC0300007077.hg.1	5.12662	4.88379	5.11804	5.50906	5.88329	6.05037	0.771424	0.0240008
AGO4	TC0100007784.hg.1	6.28824	6.90446	6.88481	7.50548	7.60262	7.2833	0.771295	0.044507
DHX57	TC0200012299.hg.1	5.68614	5.95582	6.04776	6.59434	7.04646	6.36043	0.770501	0.0419541
PJA2	TC0500011672.hg.1	7.22951	6.69899	7.54659	8.10807	8.00183	7.6741	0.769633	0.0696819
DENND4A	TC1500009804.hg.1	7.6109	7.16527	6.72939	8.01971	8.07453	7.71777	0.768813	0.0772929
RAPGEF5	TC0700010437.hg.1	7.0153	6.63477	7.18124	7.80901	7.89111	7.43722	0.768681	0.0236449
ANO6	TC1200007418.hg.1	12.0645	11.6731	11.7611	12.5458	12.5348	12.7236	0.76849	0.0104469
FCHO2	TC0500007758.hg.1	4.47133	5.28989	5.3284	6.29799	5.48905	5.60739	0.768266	0.1116
ANK2	TC0400008455.hg.1	3.93334	3.7334	2.8993	4.25043	4.32401	4.2963	0.768236	0.135435
MYNN	TC0300009451.hg.1	6.14485	6.46423	6.71883	6.91019	7.39635	7.32537	0.768001	0.0272364
ANKRD17	TC0400010995.hg.1	8.75654	8.30562	7.91788	8.9845	9.08618	9.21337	0.768	0.0777328
TMX3	TC1800008965.hg.1	8.35761	7.52781	8.01364	8.76417	8.41653	9.02223	0.767959	0.0671422
H2AFY2	TC1000007913.hg.1	5.05988	5.74148	5.74908	5.98832	6.388	6.47658	0.767489	0.0573022
LMO7	TC1300009980.hg.1	4.54066	4.15797	4.68904	5.5016	4.74423	5.44398	0.767379	0.0672228
HIST1H3G	TC0600011142.hg.1	13.5329	14.038	13.6546	14.4263	14.8217	14.2794	0.767303	0.0261511
TBC1D32	TC0600013033.hg.1	4.5256	5.269	5.10415	5.60596	5.81396	5.78064	0.767273	0.0668621
ORC3	TC0600008735.hg.1	7.33602	6.49265	6.82657	7.6321	7.35858	7.96461	0.766686	0.0701734
VBP1	TC0X00008866.hg.1	7.30478	8.00914	7.25245	8.45519	8.24264	8.16839	0.766618	0.0748376
EXOC2	TC0600010375.hg.1	7.55916	7.97926	8.01505	8.85066	8.40894	8.59277	0.766298	0.0175427
TCEB3C	TC1800008609.hg.1	4.27052	4.51179	4.53161	5.43118	5.21039	4.9704	0.766013	0.0125306
CHMP7	TC0800007016.hg.1	7.91192	8.57776	8.53241	9.27457	9.03562	9.00838	0.765494	0.055421
ZNF492	TC1900007570.hg.1	6.7733	6.52524	7.15729	7.38023	7.91334	7.4585	0.765416	0.0371321
FCGR2A	TC0100018308.hg.1	3.37785	3.34908	3.40769	4.24017	4.12254	4.06683	0.764974	0.00211489
CROT	TC0700008252.hg.1	7.1829	5.97532	6.93292	7.25414	7.76829	7.36316	0.764816	0.161868
PUM3	TC0900009404.hg.1	6.92078	6.37746	6.44959	7.2462	7.32192	7.47409	0.764794	0.0327801
ACAP2	TC0300013635.hg.1	6.71886	7.42896	7.49323	8.31356	7.87388	7.74496	0.763787	0.0722927
C12orf60	TC1200006948.hg.1	4.62085	4.69057	3.84953	4.6066	5.17479	5.67064	0.763692	0.136342
ZNF182	TC0X00011363.hg.1	5.57296	5.0751	6.35684	6.55674	6.34511	6.39208	0.76301	0.174227
AKAP13	TC1500008187.hg.1	8.03769	7.94568	7.77208	8.78684	8.78178	8.47432	0.762493	0.00520421
ZBTB21	TC2100008233.hg.1	8.90015	8.70034	8.77581	9.40454	9.54283	9.71529	0.762121	0.00362276
OGN	TC0900010794.hg.1	3.74063	3.47452	3.25401	3.95415	4.43318	4.36632	0.761498	0.020874
METTL4	TC1800007895.hg.1	7.77859	7.37131	7.44958	8.17915	8.3078	8.3969	0.761454	0.0125711
VPS45	TC0100009889.hg.1	9.26596	9.72982	9.34475	10.6343	10.0578	9.93214	0.761242	0.0506992
TDP2	TC0600011067.hg.1	8.3768	8.16614	8.39629	8.98049	9.10974	9.1323	0.761101	0.0019228
HJURP	TC0200016099.hg.1	12.8052	12.9242	13.2107	13.672	13.7422	13.8044	0.759523	0.016895
WSB1	TC1700007319.hg.1	9.81482	9.89216	10.2807	10.5138	11.0627	10.6889	0.759237	0.0253799
RPS6KB1	TC1700012287.hg.1	9.15716	8.96848	9.1165	9.69908	9.95733	9.86325	0.759171	0.00175429
IK	TC0500008863.hg.1	9.99762	9.31079	10.069	10.5324	10.6618	10.4598	0.758874	0.0806981
TMEM161B	TC0500011408.hg.1	8.72118	8.90726	8.58754	9.38461	9.34293	9.76409	0.758555	0.0126896
STK3	TC0800011216.hg.1	8.04737	7.32878	8.13562	8.36405	8.50901	8.91379	0.758364	0.0778181
WNK1	TC1200006454.hg.1	6.3766	5.80371	5.83328	6.62167	7.00625	6.65887	0.757732	0.0342031
CEACAM4	TC1900010761.hg.1	3.74694	4.50419	3.96141	5.05036	4.55711	4.87726	0.757398	0.0570942
TNFAIP8	TC0500008437.hg.1	9.82647	9.62722	10.1681	10.7644	10.6825	10.4465	0.757223	0.0219298
DYNLT3	TC0X00009384.hg.1	4.95249	4.95661	5.26594	5.43388	6.38277	5.62995	0.757185	0.107236
LARS	TC0500012372.hg.1	9.95772	10.0942	10.4045	10.7304	11.0331	10.9626	0.756551	0.0122688
MTR	TC0100012101.hg.1	7.40774	8.05908	7.89847	8.57058	8.69782	8.3661	0.756404	0.042324
SLU7	TC0500012663.hg.1	6.95607	6.70597	7.16545	7.77647	7.87102	7.44731	0.755771	0.0149979
MRE11A	TC1100012002.hg.1	9.22459	8.96516	9.23058	9.62452	10.3388	9.7242	0.755716	0.0621851
D2HGDH	TC0200011423.hg.1	5.59594	6.37812	6.45187	6.60378	7.22327	6.86573	0.755619	0.0927565
UCN	TC0200012071.hg.1	3.81854	4.11903	4.0298	4.56676	4.90793	4.7588	0.755372	0.00489524
DTWD1	TC1500010740.hg.1	7.92509	7.03391	7.65015	7.97486	8.29777	8.60185	0.755111	0.0858523
KRCC1	TC0200013357.hg.1	6.20441	6.73193	6.67139	6.8201	7.70716	7.34541	0.754979	0.0802173
E2F6	TC0200011753.hg.1	6.83599	5.39402	5.59377	6.42415	6.85793	6.80438	0.754227	0.231433
ABAT	TC1600006826.hg.1	3.06089	2.97398	2.95342	3.47331	3.78167	3.99242	0.753038	0.0328411
SERINC5	TC0500011263.hg.1	5.88841	6.28882	5.91315	6.80959	7.0612	6.47851	0.752972	0.026721
EIF4B	TC1200007687.hg.1	14.9255	14.6804	14.9986	15.5379	15.8073	15.5166	0.752457	0.00498262
SWAP70	TC1100006820.hg.1	7.11458	7.2182	7.25884	7.8052	8.11065	7.93138	0.751873	0.00530739
GPR180	TC1300007731.hg.1	6.62748	7.1817	6.77298	7.80631	7.21597	7.8144	0.751507	0.0454082
MLLT4	TC0600010235.hg.1	5.21838	5.8866	5.0044	5.876	6.1677	6.3201	0.751474	0.0873188
MESP2	TC1500008276.hg.1	2.4235	3.30534	2.93218	4.02789	3.41942	3.46751	0.751269	0.0842719
ABCC12	TC1600010215.hg.1	5.92797	4.80519	5.32868	5.964	6.20203	6.14731	0.750498	0.141002
RNF169	TC1100008435.hg.1	8.74484	9.28956	9.22193	9.86331	9.98949	9.65315	0.749873	0.0289068
ATE1	TC1000012056.hg.1	7.86867	7.56948	7.81427	8.67961	8.42801	8.39297	0.749388	0.00436235
KIFC1	TC0600007700.hg.1	9.86332	10.0519	10.3138	10.6865	11.1992	10.5914	0.749357	0.036705
AGAP4	TC1000010509.hg.1	9.25539	9.44101	9.63731	10.2928	10.1293	10.1568	0.748398	0.0104063
P2RX7	TC1200009157.hg.1	6.44407	5.29272	5.20922	6.17118	6.69519	6.32439	0.748244	0.192613
MMP17	TC1200009452.hg.1	2.86164	3.53067	3.5436	4.03615	4.03985	4.10409	0.748057	0.0785446
BRCA1	TC1700010763.hg.1	6.88561	7.12191	7.43906	7.69093	8.11876	7.87984	0.747653	0.0234135
PDLIM1	TC1000011485.hg.1	3.32441	2.52708	3.3285	3.27001	4.13018	4.02256	0.747589	0.120377
ASUN	TC1200010198.hg.1	9.29977	9.29263	9.31527	9.90007	10.2081	10.0422	0.747544	0.0134935
DEPDC4	TC1200012831.hg.1	3.72878	3.80214	3.58587	4.11573	4.80178	4.44149	0.747404	0.0524951
KLHL23	TC0200016561.hg.1	7.53793	7.21667	7.27851	8.00319	7.95219	8.31858	0.74695	0.00825162
ZNF354A	TC0500013025.hg.1	4.94924	5.653	5.52947	5.98582	6.12734	6.25808	0.74651	0.0614095
CLCN5	TC0X00007240.hg.1	4.95622	4.72593	5.3634	5.89735	5.44438	5.94315	0.746443	0.0394215
METAP1	TC0400008228.hg.1	7.35123	7.63096	7.32089	7.69602	8.07574	8.77061	0.746433	0.130957
GTSCR1	TC1800008988.hg.1	3.41462	3.65564	3.03222	4.30806	4.01941	4.01386	0.74628	0.0349753
KIAA1683	TC1900007371.hg.1	3.34086	4.52735	3.21547	4.50754	4.51267	4.30058	0.745703	0.213843
ENOX2	TC0X00010813.hg.1	6.70397	6.05458	6.36665	7.12838	7.33707	6.89672	0.745656	0.0364756
PARG	TC1000012549.hg.1	7.12889	6.09626	6.39097	7.42362	7.0822	7.34503	0.744909	0.124854
ANKRD26	TC1000010113.hg.1	6.24411	6.82833	6.51728	7.62827	7.06873	7.12454	0.743936	0.0387911
CEP95	TC1700008603.hg.1	8.92218	8.82277	9.53666	9.86659	9.90797	9.73768	0.74354	0.0728074
ESCO1	TC1800008231.hg.1	5.96384	5.05528	5.55069	6.14793	6.54422	6.10808	0.743471	0.0864634
CIR1	TC0200014990.hg.1	7.63196	7.29304	7.46439	8.13411	8.3935	8.09213	0.74345	0.00544641
CDV3	TC0300008863.hg.1	13.525	13.3998	13.8489	14.3686	14.3531	14.2821	0.743397	0.0270663
FANCD2	TC0300006575.hg.1	8.62034	9.2002	8.98235	9.83402	9.63413	9.56225	0.742505	0.0310853
SECISBP2	TC0900007865.hg.1	9.22339	9.26553	9.43937	9.93495	10.0977	10.123	0.742453	0.00117141
SENP7	TC0300011853.hg.1	4.854	4.8146	5.64736	5.821	5.20072	6.52091	0.742221	0.195462
WFDC1	TC1600008643.hg.1	2.9008	3.82102	3.49263	4.08047	4.58498	3.77407	0.741692	0.108398
BRWD1	TC2100008165.hg.1	7.1786	7.29895	7.15024	8.20819	7.61331	8.03057	0.741422	0.0446663
HIST2H3A	TC0100015701.hg.1	13.6994	14.1509	14.1861	14.7338	15.125	14.4012	0.741207	0.051402
THOC1	TC1800007849.hg.1	5.97783	6.48113	4.91904	5.84026	6.96056	6.79885	0.740556	0.273974
PIAS1	TC1500007659.hg.1	11.0488	11.1936	11.5055	12.0219	11.8852	12.0617	0.7403	0.0201448
TMEM87A	TC1500009185.hg.1	7.8895	7.5862	8.16907	8.61506	8.73512	8.51538	0.740262	0.0350925
ALOX5AP	TC1300006770.hg.1	12.9065	12.7315	12.6264	13.2333	13.7966	13.4552	0.740253	0.0283415
DHX36	TC0300012857.hg.1	7.94443	8.02795	7.85583	8.8025	8.64691	8.59791	0.739704	0.000901068
ZNF644	TC0100014895.hg.1	6.25759	6.54825	5.98131	6.7074	7.26986	7.02867	0.739589	0.0328226
CALU	TC0700009061.hg.1	11.5613	11.6081	11.8566	12.2408	12.4578	12.5446	0.739097	0.00455512
ACVRL1	TC1200010719.hg.1	5.38178	4.98647	4.41073	5.61878	6.13725	5.24017	0.739071	0.126704
SETD3	TC1400010170.hg.1	3.19992	2.8673	3.34562	3.80118	3.97573	3.85258	0.738885	0.0240004
ZNF24	TC1800008458.hg.1	7.48012	7.04206	7.24965	7.65686	8.14157	8.19002	0.738871	0.0287323
GGNBP2	TC1700007638.hg.1	9.9132	9.72232	9.9866	10.8313	10.7637	10.2432	0.738676	0.0420195
GCSAM	TC0300011988.hg.1	5.53331	5.31305	5.51839	5.92422	6.35493	6.3003	0.738231	0.0166252
DDX60	TC0400012366.hg.1	4.60149	4.79794	4.43005	5.48692	5.02313	5.53062	0.737061	0.0250495
OR2T5	TC0100012360.hg.1	6.48557	6.28389	5.38811	6.86956	6.95017	6.5478	0.736657	0.149564
TCERG1	TC0500009012.hg.1	3.83147	4.74224	4.77743	5.12829	4.45406	5.97519	0.735469	0.250981
WAC	TC1000007127.hg.1	13.3367	13.4704	13.4006	14.0285	14.2811	14.1031	0.73503	0.00320292
HTATSF1	TC0X00008533.hg.1	9.86401	9.9476	10.3961	10.8228	10.6596	10.93	0.734929	0.0302381
PPP1CB	TC0200016422.hg.1	10.3588	10.0647	10.4684	10.7421	11.0729	11.2806	0.734597	0.023037
FAM72B	TC0100015509.hg.1	13.0689	12.5068	12.5601	13.5938	13.4329	13.3121	0.73433	0.0378347
PHF14	TC0700006715.hg.1	8.37173	8.59181	8.5973	9.2308	9.37301	9.15979	0.734252	0.00183855
BARD1	TC0200015643.hg.1	8.21656	8.11367	8.53705	9.08093	9.31985	8.66909	0.734197	0.039513
VNN2	TC0600013205.hg.1	3.18377	3.08507	3.19191	3.921	3.92009	3.82197	0.734102	0.000103835
CCNT1	TC1200010591.hg.1	10.2951	10.2405	10.5169	10.902	11.4188	10.9339	0.734093	0.0302982
RBM7	TC1100013096.hg.1	6.80655	7.73132	7.48136	8.36385	7.9641	7.89317	0.733965	0.0992913
BIVM-ERCC5	TC1300009992.hg.1	5.65922	5.79213	5.35952	6.29164	6.25186	6.46901	0.73388	0.0145297
TIA1	TC0200016684.hg.1	10.114	9.61799	10.25	10.6049	10.7571	10.8214	0.73385	0.0503717
PECR	TC0200016768.hg.1	7.75543	6.93344	8.05547	8.28087	8.29069	8.37231	0.733176	0.159422
MAP4K5	TC1400009131.hg.1	10.9368	10.9021	10.9148	11.6209	11.5837	11.7485	0.73312	0.00344527
GIGYF2	TC0200016601.hg.1	8.14877	8.2109	7.69338	8.76288	8.62145	8.86805	0.733113	0.0308677
DIXDC1	TC1100009043.hg.1	5.16714	5.48215	5.07251	5.93119	5.97687	6.01299	0.733087	0.0240083
USP33	TC0100014653.hg.1	8.64694	8.25559	8.09769	8.92159	9.29927	8.97834	0.732992	0.0258141
FAM231D	TC0100018280.hg.1	7.00081	7.17564	6.80471	7.39806	7.62238	8.15954	0.732942	0.0647186
LMBR1	TC0700013224.hg.1	4.28889	3.69531	4.18126	5.09773	4.81327	4.45329	0.732941	0.0484134
MTMR2	TC1100012033.hg.1	9.49622	9.42449	9.58866	10.3403	10.1982	10.1693	0.7328	0.000529108
GTPBP10	TC0700013395.hg.1	8.27557	6.97909	8.58771	8.73975	8.84735	8.45314	0.732621	0.272731
GCC1	TC0700013616.hg.1	6.16537	6.4083	6.63342	7.01998	7.14491	7.23943	0.732408	0.0183795
FAM102B	TC0100009324.hg.1	8.5592	8.2824	8.41269	9.21626	9.24496	8.98929	0.732077	0.00299646
APC	TC0500013211.hg.1	5.44269	5.59699	5.46307	6.58625	5.8705	6.23982	0.731271	0.0645517
EXOC5	TC1400009295.hg.1	8.33952	7.3672	7.85915	8.73695	8.46824	8.55421	0.731175	0.111977
USP28	TC1100012358.hg.1	6.39618	5.91177	5.95005	6.90863	6.88141	6.66141	0.731148	0.025414
MFSD8	TC0400011815.hg.1	7.52506	7.30057	7.45297	8.47267	8.43529	7.56393	0.731094	0.126758
KIAA0430	TC1600009531.hg.1	6.45868	4.73137	5.77148	6.07413	6.647	6.43218	0.730592	0.280337
GVQW2	TC0600013341.hg.1	6.16248	6.12117	6.48872	7.03191	6.74224	7.18741	0.72973	0.0143427
IKZF2	TC0200015631.hg.1	6.61265	7.84495	7.99887	8.38475	8.06893	8.19126	0.72949	0.235132
SLTM	TC1500009585.hg.1	8.88626	8.68179	8.53483	9.28929	9.70569	9.29592	0.729339	0.01557
GPR75-ASB3	TC0200016667.hg.1	9.41795	9.81135	9.71369	10.2826	10.389	10.459	0.729195	0.0140912
ZNF528	TC1900008699.hg.1	6.58121	6.1822	6.2208	7.27623	7.05628	6.83803	0.728777	0.0152892
RBL1	TC2000009026.hg.1	11.7236	11.3361	11.4897	11.9782	12.4358	12.3205	0.728407	0.0160413
MCM6	TC0200014404.hg.1	8.80936	8.21627	9.06353	9.53628	9.52722	9.21071	0.728353	0.0846224
C12orf4	TC1200009672.hg.1	6.45821	7.08202	7.62162	7.80515	7.68327	7.85822	0.728264	0.15977
MTDH	TC0800008314.hg.1	12.7251	12.7691	12.696	13.2968	13.625	13.453	0.7282	0.0131917
MTMR6	TC1300008388.hg.1	6.83724	7.9567	6.80476	7.91032	7.81444	8.0582	0.728083	0.190979
HIST1H2AE	TC0600007285.hg.1	15.1645	15.0398	15.6028	15.9405	16.0163	16.0341	0.727957	0.0473773
CDK17	TC1200011608.hg.1	10.5259	10.5877	10.8167	11.2086	11.5603	11.3449	0.727807	0.00612461
COQ3	TC0600012654.hg.1	6.40046	6.62352	7.23244	7.64429	7.65128	7.14364	0.727598	0.0812972
POTEA	TC0800007466.hg.1	4.60217	4.99443	5.44459	5.40321	5.94161	5.87776	0.727127	0.0779881
TRAT1	TC0300008290.hg.1	8.16918	8.07823	7.46856	8.32282	8.99816	8.5731	0.726033	0.0705798
HDAC4	TC0200016274.hg.1	5.22009	4.44323	4.87082	5.80375	5.7523	5.15458	0.725491	0.0773602
CROCC	TC0100007091.hg.1	6.81992	6.6083	6.42705	6.33688	7.45611	8.23722	0.724985	0.318108
TAF4B	TC1800006937.hg.1	6.82413	7.63891	7.31447	7.61201	8.0339	8.30646	0.724954	0.0819745
CLTC	TC1700008465.hg.1	9.5007	9.05975	9.38259	10.0938	9.89751	10.1264	0.724902	0.0158343
ABHD18	TC0400008666.hg.1	9.19982	9.00508	9.28951	9.76611	10.1624	9.73978	0.724639	0.0162672
ZNF709	TC1900011885.hg.1	4.4691	4.99293	4.72848	5.60484	5.82638	4.93246	0.724388	0.0962257
FAM175B	TC1000009217.hg.1	7.73726	7.97721	8.3126	8.74758	8.76799	8.68453	0.724339	0.0463888
PIGA	TC0X00009124.hg.1	8.18226	7.14984	7.39717	8.14574	8.72367	8.03052	0.723558	0.137069
GPATCH2L	TC1400010632.hg.1	8.28964	8.65112	8.96106	9.14887	9.4394	9.48164	0.722696	0.0449027
TOMM70A	TC0300011842.hg.1	10.0662	9.92117	10.256	10.7273	10.9232	10.759	0.72203	0.00568472
USP14	TC1800006437.hg.1	10.5302	10.4686	10.9809	11.521	11.4553	11.169	0.721847	0.0261258
ROBO1	TC0300011628.hg.1	8.21423	8.48561	7.91971	8.82144	8.95932	9.00393	0.721713	0.0366702
TLR5	TC0100017445.hg.1	3.06324	4.58398	3.83317	4.58276	4.97056	4.09191	0.721613	0.244492
ARL6	TC0300008086.hg.1	4.7778	5.67753	5.10652	5.65938	5.99081	6.07637	0.721567	0.0932763
ZMYND11	TC1000006434.hg.1	6.28851	6.26947	6.09343	7.00113	7.28795	6.52668	0.721451	0.0736509
SSR1	TC0600014233.hg.1	11.6548	11.611	11.8218	12.3701	12.502	12.3794	0.72132	0.0013902
SAMD11	TC0100006476.hg.1	4.40541	4.37629	4.92877	5.04976	5.53147	5.2912	0.720651	0.0367175
PPAT	TC0400010770.hg.1	10.2275	9.98923	10.2843	10.8147	11.0989	10.7492	0.720597	0.00735187
ZFP69B	TC0100007958.hg.1	5.24138	4.96222	4.55938	5.43002	5.75552	5.7389	0.720493	0.0476903
DGKI	TC0700012731.hg.1	3.07698	3.80482	4.02822	3.82456	5.22588	4.02016	0.720194	0.251713
E2F3	TC0600007138.hg.1	6.79976	6.82267	6.78625	7.49371	7.44001	7.6355	0.72018	0.00525623
APOOL	TC0X00007777.hg.1	8.58324	8.64419	8.36618	9.14607	9.2232	9.3846	0.720086	0.00312667
THUMPD3	TC0300006542.hg.1	9.31725	9.08618	9.60857	10.1384	10.1075	9.92541	0.719778	0.0267052
ZNF75D	TC0X00010895.hg.1	3.64085	3.46793	3.76493	4.6388	4.30116	4.09202	0.719425	0.0271994
ZFP90	TC1600008199.hg.1	7.69993	8.60039	8.68978	9.20386	8.87251	9.06999	0.718754	0.141564
ASXL2	TC0200016645.hg.1	9.50502	9.31966	8.80709	9.97724	9.79048	10.0187	0.718227	0.0627564
TPX2	TC2000007089.hg.1	11.3583	11.2581	11.2416	12.0161	11.7375	12.2581	0.71792	0.0350332
ANXA3	TC0400007933.hg.1	7.92125	7.82335	7.53714	8.26293	8.30652	8.86599	0.717898	0.0447818
FAM83D	TC2000007341.hg.1	9.7358	9.40821	9.97137	10.3952	10.5598	10.3139	0.717835	0.0323604
ZNF449	TC0X00008509.hg.1	5.11739	6.47198	5.54345	6.52359	6.30579	6.45692	0.717827	0.212139
HIST2H4B	TC0100009870.hg.1	13.1129	13.1684	13.463	14.0836	13.9658	13.8477	0.71759	0.00825274
BDH2	TC0400012952.hg.1	7.20447	6.98664	8.09247	8.38081	8.26969	7.78474	0.71722	0.15666
RAD54B	TC0800011137.hg.1	6.97424	7.25221	7.27097	8.10289	7.75576	7.78853	0.716587	0.00850391
GCFC2	TC0200013137.hg.1	5.40551	5.3853	4.69892	5.33543	5.97513	6.32871	0.716514	0.12988
ZRANB3	TC0200014390.hg.1	3.83244	4.05313	4.07822	4.68034	4.59437	4.83801	0.71631	0.00255351
SKA1	TC1800007316.hg.1	9.08412	8.45336	9.2699	9.37638	9.58823	9.99005	0.715757	0.0854138
FMR1	TC0X00008668.hg.1	8.94159	8.80998	9.25962	9.7204	9.94147	9.49543	0.715364	0.0182319
TRIP12	TC0200015965.hg.1	6.93185	7.30696	8.14667	7.69921	8.68256	8.14901	0.715103	0.197156
RAB6C	TC0200009270.hg.1	5.83018	5.83961	6.22376	6.39224	6.55559	7.09039	0.714896	0.0557801
ASTE1	TC0300012435.hg.1	6.5338	7.08209	7.24466	7.49888	8.03546	7.46949	0.714427	0.0665168
TRMT6	TC2000008310.hg.1	10.6328	10.4367	11.1407	11.2922	11.5987	11.4619	0.714213	0.0599343
TFRC	TC0300013684.hg.1	10.103	9.90367	9.70852	10.7259	10.5344	10.596	0.7137	0.011921
CLASP2	TC0300010682.hg.1	3.70215	3.33938	3.10795	4.34882	3.90345	4.03807	0.71362	0.033649
TMEM67	TC0800008241.hg.1	6.13731	5.72823	6.78564	7.26296	6.52757	7.00096	0.71344	0.138685
HIST3H3	TC0100017614.hg.1	4.37188	4.14862	4.27637	4.86189	5.35011	4.72407	0.713069	0.0519845
IARS2	TC0100011648.hg.1	11.2209	11.0227	11.1778	11.8442	11.8677	11.8477	0.712727	0.0064321
TTC34	TC0100018394.hg.1	6.72953	6.1421	6.66075	7.24582	7.45886	6.96518	0.712491	0.0415512
RHOT1	TC1700007504.hg.1	8.64854	8.71821	9.07242	9.15924	9.32787	10.0892	0.712381	0.114674
CPSF3	TC0200006647.hg.1	8.89877	9.58989	9.3447	10.0413	10.1174	9.81163	0.712337	0.0542726
CCDC186	TC1000011892.hg.1	4.20388	4.62685	4.87568	5.20181	5.34556	5.29476	0.711907	0.0623581
CNOT10	TC0300006978.hg.1	8.86506	8.85501	9.09241	9.59726	9.94072	9.41018	0.711888	0.0273212
RGPD4	TC0200008790.hg.1	4.48392	3.61937	3.6467	4.83581	4.32597	4.72343	0.711743	0.112238
CCAR1	TC1000007866.hg.1	8.59962	8.18666	8.80114	9.00125	9.63916	9.0802	0.71106	0.0587414
API5L1	TC0X00010591.hg.1	3.21483	3.44684	3.46985	3.75443	4.12915	4.37945	0.710503	0.0426041
ZBED1	TC0X00008914.hg.1	7.71261	8.11137	8.64889	9.18363	8.77548	8.64463	0.710291	0.10292
PAX6	TC1100010456.hg.1	7.83923	7.6668	8.11058	8.52188	8.38247	8.8426	0.710112	0.0194889
MRGPRD	TC1100011398.hg.1	4.52767	4.1658	4.16748	5.18776	4.9117	4.89164	0.71005	0.011116
PPP6R3	TC1100008187.hg.1	10.323	9.44446	9.87192	10.7187	10.5437	10.5065	0.709842	0.099318
FAM46A	TC0600014318.hg.1	5.3531	5.16983	5.82201	6.06827	6.28297	6.12233	0.709545	0.0555349
HDLBP	TC0200016354.hg.1	6.45437	4.77757	5.25206	6.04514	6.30957	6.25762	0.709445	0.289832
INTS4	TC1100011735.hg.1	8.70805	7.81999	8.64513	8.89813	9.43428	8.96831	0.709181	0.115649
DYNC1I2	TC0200009959.hg.1	8.52657	8.15185	8.81212	9.17452	9.37805	9.06432	0.708783	0.0471546
MDN1	TC0600012551.hg.1	7.79653	7.36648	7.88261	8.25804	8.5516	8.36229	0.708765	0.0285331
NAA16	TC1300006974.hg.1	7.41653	7.19009	8.05703	8.58174	8.19123	8.01503	0.708116	0.0949319
KIAA1143	TSUnmapped00000180.hg.1	7.64619	7.41498	7.10988	7.75878	8.23094	8.3041	0.707592	0.0379542
TTF2	TC0100009561.hg.1	7.6485	7.40714	8.41965	8.26397	8.74182	8.59215	0.707549	0.132007
ZNF558	TC1900009558.hg.1	4.31308	5.89846	5.60951	5.73701	6.05	6.15616	0.707372	0.281458
RAD18	TC0300010186.hg.1	8.19979	8.09055	8.25618	8.89284	8.81331	8.96176	0.707131	0.000435507
FNDC3A	TC1300007152.hg.1	6.15509	6.55024	6.5436	7.15688	7.10623	7.10626	0.706815	0.0307362
SOCS4	TC1400007221.hg.1	7.49058	7.39933	7.7769	8.07103	8.3046	8.41021	0.706343	0.00996167
PYROXD1	TC1200007051.hg.1	7.61777	5.79311	6.71552	8.02707	7.04254	7.1754	0.706205	0.325698
GYPC	TC0200014154.hg.1	4.16939	4.25404	4.055	4.17063	5.69987	4.72511	0.705726	0.253942
BLVRA	TC0700007352.hg.1	6.98667	7.11977	6.43242	7.40123	7.55589	7.69837	0.705543	0.0627188
THSD1	TC1300009012.hg.1	5.23686	4.79544	5.14125	5.47725	6.18145	5.63051	0.705217	0.059839
FEM1B	TC1500007671.hg.1	10.3686	9.99598	10.1215	10.7494	10.9696	10.8802	0.704422	0.00947659
ANKUB1	TC0300014063.hg.1	3.80546	3.36398	3.7408	4.35727	4.74767	3.91706	0.703922	0.0794088
PPIL4	TC0600013523.hg.1	6.76069	6.88251	7.70015	7.45319	7.91507	8.08667	0.70386	0.127144
HMGB2	TC0400012432.hg.1	12.8901	13.2445	13.5076	13.7186	14.0811	13.9534	0.703633	0.0380581
JMY	TC0500007881.hg.1	6.45119	6.22708	5.93155	7.25065	6.80654	6.6634	0.70359	0.0400459
GLOD4	TC1700012322.hg.1	5.13703	5.80185	6.13709	6.29321	7.01005	5.88285	0.70338	0.187192
ZNF280C	TC0X00010804.hg.1	8.20231	7.54428	8.23172	8.51662	8.88689	8.68384	0.703017	0.0699598
FAM76B	TC1100012029.hg.1	8.13121	9.41301	8.52408	9.51498	9.57198	9.0887	0.702448	0.196809
PDSS2	TC0600012752.hg.1	4.81399	5.46472	5.87553	6.06479	6.69882	5.49767	0.702346	0.206066
FANCG	TC0900009930.hg.1	5.4415	5.20446	6.6505	6.38122	6.58871	6.43228	0.701918	0.256178
LRRC37A2	TC1700008102.hg.1	10.2561	8.97798	9.65528	10.1836	10.2249	10.5856	0.701581	0.189638
NLN	TC0500007607.hg.1	7.90318	6.74032	7.50363	8.07507	8.02386	8.15265	0.701483	0.174619
CDK12	TC1700007749.hg.1	5.85489	6.11287	6.6569	6.60641	6.96223	7.1597	0.701223	0.0789254
L2HGDH	TC1400009124.hg.1	6.32244	5.96843	6.60288	7.21884	6.609	7.16942	0.701169	0.0593972
SNAP25	TC2000006688.hg.1	5.54609	5.62435	6.43357	6.23117	6.57023	6.90483	0.70074	0.120354
CLDN24	TC0400012565.hg.1	3.14372	3.02838	3.40606	4.49145	3.42881	3.75949	0.700532	0.144304
ZNF484	TC0900010814.hg.1	3.55948	4.1671	4.06739	4.43228	4.81104	4.65088	0.700077	0.0441763
CLDND2	TC1900012017.hg.1	5.69107	5.9931	5.45096	6.40626	6.6331	6.19503	0.699756	0.0273787
TANK	TC0200009806.hg.1	5.98756	6.63409	7.15774	7.58115	7.43417	6.8632	0.699712	0.169501
WDSUB1	TC0200014717.hg.1	6.36591	7.31991	7.18395	7.56231	7.6973	7.70915	0.699659	0.14016
PIK3C3	TC1800007155.hg.1	6.98867	5.48991	6.17904	7.24319	7.1933	6.31998	0.699617	0.262884
PRC1	TC1500010463.hg.1	11.0151	11.2993	11.3384	11.8421	11.9616	11.9463	0.699087	0.0124484
C10orf88	TC1000012088.hg.1	8.47105	8.50349	8.65938	9.09588	9.56313	9.07182	0.698971	0.0362335
ZNF711	TC0X00007781.hg.1	7.85178	7.74732	7.66455	8.80053	8.40418	8.15173	0.697594	0.0566158
KDM5A	TC1200009550.hg.1	7.28966	7.71753	7.47026	8.20598	8.29226	8.06879	0.696527	0.0153302
STX17	TC0900008222.hg.1	6.59778	7.25035	7.15444	7.73275	7.64252	7.71577	0.696157	0.0732433
OFD1	TC0X00006658.hg.1	4.34313	5.03939	4.86503	4.58906	5.88905	5.85528	0.69528	0.243254
ZBTB33	TC0X00008273.hg.1	8.99722	8.63298	8.40515	9.29979	9.42642	9.39099	0.693948	0.0507787
GAPVD1	TC0900008750.hg.1	7.04517	7.17815	6.7335	8.00051	7.37064	7.66681	0.693711	0.0414888
PPP1R21	TC0200007535.hg.1	6.16019	4.80224	5.67155	6.28221	6.14722	6.28538	0.693609	0.221611
POLD3	TC1100013071.hg.1	9.75679	9.70654	9.75794	10.2332	10.7602	10.3085	0.693528	0.0505723
TTC39B	TC0900009588.hg.1	2.96951	3.3181	2.50077	4.02964	2.93599	3.90319	0.693475	0.182266
LOC643802	TC1600010334.hg.1	4.71562	4.00029	4.54428	5.28148	5.50232	4.55443	0.692684	0.130876
USP15	TC1200007954.hg.1	7.89364	6.79581	7.81844	7.89257	8.21156	8.48071	0.692315	0.180124
ZNF639	TC0300009600.hg.1	9.57294	9.50283	9.8925	10.5923	10.3344	10.118	0.692125	0.0197282
OSBPL3	TC0700010504.hg.1	7.09424	6.78498	7.38957	7.61102	7.80377	7.92944	0.691812	0.0385664
SPIRE1	TC1800008121.hg.1	4.99929	4.52287	4.39102	5.01675	5.53805	5.43329	0.691635	0.048254
RBPJ	TC0400007120.hg.1	6.69351	6.64893	6.73365	7.07906	7.58125	7.48899	0.69107	0.0434189
ACSL3	TC0200010907.hg.1	7.3082	7.87268	7.97774	8.33967	8.42207	8.46913	0.690751	0.0754324
STXBP3	TC0100009331.hg.1	6.89732	7.14772	7.07973	7.38193	8.12716	7.68681	0.690377	0.0728147
LOC100506142	TC0200012488.hg.1	2.25403	2.50085	2.42843	2.71358	3.38915	3.15018	0.689869	0.0592514
NASP	TC0100008127.hg.1	11.8395	11.8557	12.1305	12.5692	12.8971	12.4269	0.689147	0.0192747
FAM208A	TC0300011256.hg.1	7.17817	7.7981	7.58251	8.41837	7.83562	8.37106	0.688753	0.0574746
EIF5B	TC0200008587.hg.1	7.34941	7.45051	7.90414	8.18868	8.11481	8.46617	0.688536	0.0351232
FGD6	TC1200011574.hg.1	4.73586	5.15602	5.18382	5.75756	5.27618	6.10698	0.688343	0.0844757
CD1B	TC0100016065.hg.1	3.72585	4.24817	4.13457	4.62239	4.82861	4.72198	0.688128	0.0362978
SBNO1	TC1200012267.hg.1	8.00441	7.21516	6.79224	8.11775	8.38208	7.57505	0.687692	0.193073
ZNF41	TC0X00009569.hg.1	6.50688	6.54135	5.95085	6.82108	6.80168	7.4356	0.686427	0.0726006
EYA2	TC2000007545.hg.1	4.68893	5.27254	5.01418	5.24485	5.79661	5.99332	0.686377	0.0755013
LMBR1	TC0700013219.hg.1	10.3375	10.3616	9.79963	10.9082	11.1629	10.4855	0.685929	0.0640278
DOCK2	TC0500009378.hg.1	10.3427	9.9812	10.5447	10.7268	11.0759	11.1234	0.685848	0.0327747
NUP58	TC1300006641.hg.1	11.2441	11.1727	11.3175	11.6715	12.2867	11.833	0.68563	0.0587946
STAT1	TC0200015242.hg.1	11.4763	11.4988	11.1903	12.0482	12.1292	12.0431	0.685057	0.0149017
ZNF22	TC1000007462.hg.1	7.65676	7.92453	8.27975	8.66822	8.56417	8.68028	0.683876	0.057833
IZUMO2	TC1900011190.hg.1	3.10361	3.13848	3.24882	3.58011	4.27156	3.68937	0.683376	0.0805767
EMSY	TC1100008505.hg.1	10.5716	10.4048	10.3714	11.0527	11.2576	11.0875	0.68332	0.00152012
NEDD1	TC1200008544.hg.1	7.36181	7.50442	7.61174	7.99011	8.44474	8.09281	0.68323	0.0214463
HIST2H3D	TC0100015698.hg.1	9.9346	9.53775	9.96648	10.4673	10.6069	10.4139	0.683074	0.0250565
IMMP1L	TC1100010451.hg.1	7.31844	5.57223	5.99351	6.9327	6.82274	7.17638	0.682546	0.323092
TSNAX	TC0100018359.hg.1	9.28546	9.27232	9.1204	9.83576	10.1164	9.7735	0.68249	0.0107833
HIST2H4A	TC0100015707.hg.1	13.0781	13.2537	13.4269	13.989	13.9954	13.8212	0.682293	0.00838286
HNRNPCL1	TSUnmapped00000528.hg.1	3.0238	3.06726	3.75383	3.45173	4.33774	4.10225	0.682273	0.127995
FAM169A	TC0500013328.hg.1	7.84916	7.9207	7.83778	8.28538	8.55709	8.81129	0.682041	0.0427053
GDAP1	TC0800007985.hg.1	5.49631	6.09703	6.44117	6.78659	6.44408	6.84959	0.681913	0.116628
ZNF33A	TC1000007333.hg.1	7.01954	5.36066	4.91261	6.26995	6.65535	6.41175	0.681415	0.399375
NMRK1	TC0900010445.hg.1	6.29181	8.37684	7.61189	8.55383	7.64679	8.12344	0.681172	0.386848
SLAMF6	TC0100010303.hg.1	2.41246	2.77752	3.32201	2.85039	4.26284	3.44204	0.681093	0.2461
ZNF75A	TC1600006685.hg.1	6.35065	6.45065	6.23932	7.36366	6.95606	6.76392	0.681004	0.0489749
TBCK	TC0400011524.hg.1	7.7834	8.95796	7.77047	8.93468	8.63345	8.98665	0.680987	0.220689
TAS2R14	TC1200012758.hg.1	4.72268	4.40624	4.38545	5.33071	5.44166	4.7846	0.680865	0.0582568
PHF10	TC0600014374.hg.1	10.6749	10.4689	10.8661	11.3136	11.5773	11.1613	0.680757	0.0152708
PHYHIP	TC0800009833.hg.1	3.86197	3.7191	3.56624	4.42694	4.39063	4.37188	0.680712	0.0130043
MORC4	TC0X00010459.hg.1	4.35284	4.83802	4.61998	5.64748	5.15786	5.0472	0.680569	0.0462919
ACTG2	TC0200008062.hg.1	5.60411	5.27364	5.69746	6.05759	6.01347	6.54347	0.679771	0.036651
KIF1A	TC0200016332.hg.1	5.64	5.17072	6.08295	6.37571	6.45923	6.09578	0.679016	0.108145
GZF1	TC2000006957.hg.1	7.3015	7.09125	8.24066	7.6665	8.6231	8.37987	0.678685	0.213172
CTR9	TC1100006840.hg.1	7.41337	6.92678	6.92549	7.64768	7.9369	7.71663	0.678524	0.0335119
DENND4C	TC0900006758.hg.1	4.86585	5.83419	5.13418	5.80055	6.28492	5.78297	0.678076	0.128869
HIST1H1D	TC0600011138.hg.1	12.184	12.13	12.3573	12.6234	13.2645	12.816	0.67753	0.0569244
FAM72A	TC0100017094.hg.1	12.9682	12.6008	12.5834	13.565	13.3257	13.292	0.67676	0.0148042
ARPP21	TC0300007016.hg.1	4.36138	5.81116	3.78321	6.09238	5.57728	4.31577	0.676561	0.446886
RPS6KC1	TC0100011554.hg.1	2.85713	3.09784	3.46629	4.21889	3.68194	3.55008	0.676548	0.0680048
STK17B	TC0200015314.hg.1	10.3838	10.3369	11.012	11.0614	11.3974	11.3031	0.676393	0.0717796
BCAT1	TC1200010145.hg.1	10.8278	10.7954	10.6028	11.4065	11.5902	11.2575	0.676087	0.00619268
XPO7	TC0800006963.hg.1	11.4861	10.9987	11.1824	11.7862	12.2987	11.6107	0.676077	0.0616414
PHF20	TC2000007231.hg.1	9.45135	10.0964	10.1834	10.4834	10.9809	10.2942	0.675823	0.0946679
SCAF11	TC1200007430.hg.1	5.8188	4.66023	4.81576	5.52374	6.47904	5.31859	0.675529	0.255601
SORL1	TC1100009309.hg.1	4.68784	4.13424	4.34653	4.98708	4.65395	5.55349	0.675306	0.107398
HIST1H3I	TC0600011233.hg.1	15.7435	15.7474	15.9195	16.4106	16.6001	16.4247	0.675057	0.00132383
ZBED1	TC0Y00006890.hg.1	6.2356	6.59319	7.20945	7.65203	7.2857	7.12459	0.674691	0.125982
CA13	TC0800012322.hg.1	3.42728	4.3917	4.19729	4.81902	5.01312	4.20763	0.6745	0.154477
SLC16A7	TC1200007931.hg.1	6.50431	5.82796	6.54373	6.89654	6.89441	7.108	0.674314	0.0903048
SLC16A1	TSUnmapped00000134.hg.1	8.33265	8.30867	8.39398	8.8154	9.0652	9.17743	0.674246	0.0196714
SNX10	TC0700006984.hg.1	7.20545	7.42611	7.63423	8.22888	7.90761	8.15175	0.67415	0.0143962
SMTN	TC2200009259.hg.1	8.83719	8.96739	9.20061	9.62779	9.68291	9.71608	0.673864	0.0192689
C5orf51	TC0500007249.hg.1	8.77356	9.58071	9.4131	9.7703	10.1749	9.84212	0.673305	0.0933663
ZNF175	TC1900008655.hg.1	4.73397	4.84896	5.54118	5.68701	5.74624	5.70934	0.672831	0.115711
NOL10	TC0200011726.hg.1	9.1787	9.30847	8.86206	9.88984	9.73179	9.74529	0.672562	0.0250197
EDRF1	TC1000009240.hg.1	6.65059	6.61581	6.58337	7.19835	7.11029	7.55801	0.672293	0.0367964
HIF1A	TC1400010619.hg.1	10.4228	10.3614	10.336	11.1615	10.986	10.989	0.67211	0.00258212
WDR44	TC0X00008223.hg.1	7.92387	7.35671	7.3561	8.20757	8.30763	8.13717	0.671895	0.0626716
ZNF846	TC1900011858.hg.1	5.29848	4.82821	5.64468	5.75932	5.83599	6.19123	0.671722	0.0856609
ATL2	TC0200012282.hg.1	10.0103	9.46048	10.3886	10.5916	10.6706	10.6113	0.671387	0.12923
CDH4	TC2000007973.hg.1	7.80917	7.9161	8.05382	8.28646	8.62288	8.88371	0.671322	0.0450093
MBD4	TC0300012393.hg.1	8.63523	7.95315	9.03764	9.47328	9.09746	9.0687	0.671145	0.156406
TXNRD1	TC1200008675.hg.1	11.2004	11.0914	11.6202	11.6824	12.2075	12.0355	0.671127	0.0398328
ZNF880	TC1900008696.hg.1	7.71757	7.25459	8.02914	8.19782	8.54429	8.27133	0.670715	0.078431
EIF2S3	TC0X00006803.hg.1	13.8104	13.8243	14.1851	14.6178	14.8218	14.3921	0.67067	0.0184022
VPS13A	TC0900007646.hg.1	4.61788	4.29157	4.63898	5.0283	5.15518	5.37677	0.670608	0.011761
ZNF780B	TSUnmapped00000054.hg.1	4.40247	4.81408	5.72277	5.93214	5.57707	5.43942	0.669768	0.2218
ZNF780B	TSUnmapped00000177.hg.1	4.40247	4.81408	5.72277	5.93214	5.57707	5.43942	0.669768	0.2218
USF3	TC0300012027.hg.1	6.08179	6.5601	6.8938	7.12382	7.39851	7.02235	0.669663	0.0867638
MALT1	TC1800007431.hg.1	7.70778	7.85383	8.06229	8.58021	8.36356	8.6875	0.669124	0.00895309
RDH11	TC1400010765.hg.1	9.01324	9.36599	9.51647	9.93339	10.0867	9.88261	0.668991	0.0320733
MGME1	TC2000006813.hg.1	10.6855	10.2137	10.6724	11.2297	11.1254	11.2231	0.66889	0.0443064
CAPZA1	TC0100009444.hg.1	10.9112	10.6785	10.9446	11.46	11.6128	11.4671	0.668557	0.00482773
ZNF331	TC1900008755.hg.1	6.23671	6.81865	6.42558	6.85243	7.19665	7.43685	0.668327	0.0502507
TYW3	TC0100008752.hg.1	7.86629	6.87442	7.50111	7.69765	8.2576	8.29154	0.668324	0.137625
MAPK15	TC0800009212.hg.1	4.21888	4.62025	4.65507	4.93113	5.51003	5.05776	0.668237	0.043546
HIST1H2BF	TC0600007282.hg.1	12.3401	13.0406	12.9588	13.3405	13.6861	13.317	0.668043	0.0744821
GOLGA8K	TC1500010846.hg.1	6.87842	5.30308	6.12081	6.76479	6.19614	7.34518	0.667934	0.306741
SRPK1	TC0600011644.hg.1	6.6405	7.71784	7.00602	7.49873	8.34333	7.52534	0.667683	0.188808
PTPRC	TC0100011105.hg.1	10.8659	10.6721	10.9904	11.3867	11.6368	11.5066	0.667213	0.00562951
SYNJ1	TC2100007964.hg.1	6.11576	5.8869	5.87452	6.85528	6.35832	6.66485	0.667095	0.0257448
SNRNP48	TC0600006870.hg.1	8.25582	8.31598	8.54679	8.99166	9.16645	8.96068	0.666734	0.00495238
SCYL2	TC1200008592.hg.1	8.78435	7.5658	8.42559	8.66193	8.95261	9.15982	0.666206	0.198551
CSTA	TC0300008550.hg.1	7.30006	6.33457	6.93537	7.38403	7.77152	7.41296	0.666174	0.12708
NOL8	TC0900010792.hg.1	7.39641	7.06936	6.83568	7.70417	7.85095	7.74475	0.666141	0.0466106
RAD51B	TC1400007511.hg.1	8.73261	8.6235	9.5718	9.84612	9.45969	9.62023	0.666041	0.144625
DHFRL1	TC0300011760.hg.1	8.64849	8.24162	8.28627	9.05626	8.95015	9.16779	0.665937	0.0202446
CNOT6L	TC0400011108.hg.1	8.72146	8.59783	8.81266	9.10787	9.57462	9.44624	0.66559	0.0261761
ZNF98	TC1900011920.hg.1	6.82221	8.49717	8.30094	8.57761	8.57232	8.46597	0.665198	0.335149
SUPT20H	TC1300008633.hg.1	12.1917	12.2736	12.1161	12.7988	12.9794	12.7988	0.665197	0.00126214
EXOC6B	TC0200013046.hg.1	6.7862	5.17475	5.68525	6.72129	6.21559	6.70428	0.664985	0.295318
FILIP1L	TC0300011834.hg.1	2.89578	2.48359	2.68349	3.4914	3.70978	2.8565	0.664942	0.105103
ANKRD37	TC0400009525.hg.1	6.36044	6.44226	6.55642	7.00486	7.4933	6.85576	0.664934	0.0644696
ZFR	TC0500010427.hg.1	8.33126	9.28198	8.30051	9.48256	9.07549	9.35036	0.664886	0.164815
HIST1H2BO	TC0600007384.hg.1	7.99085	8.17372	8.24114	8.95675	8.84469	8.59893	0.664884	0.00899899
ZNF724P	TC1900010209.hg.1	7.99692	8.69276	8.17791	8.67786	9.24053	8.94344	0.664749	0.0693853
ANKMY2	TC0700010352.hg.1	8.15764	7.60505	8.09972	8.43401	8.66042	8.76095	0.664325	0.0427397
SLC30A1	TC0100017212.hg.1	6.14157	6.38411	6.76861	7.25431	6.79787	7.23437	0.664083	0.0501204
PSMC1	TC1400007947.hg.1	11.0181	10.7195	10.8094	11.3979	11.8151	11.3259	0.663997	0.0291276
NEK7	TC0100011096.hg.1	9.72073	9.17315	9.47611	10.369	10.1674	9.82516	0.663828	0.0415283
CYB5R4	TC0600014148.hg.1	7.73752	7.77357	7.69448	7.89863	8.58592	8.71191	0.663631	0.118408
LRRC20	TC1000010918.hg.1	4.1594	5.20529	5.60177	5.92191	5.70826	5.3269	0.663537	0.259812
HIST1H2AG	TC0600014083.hg.1	15.8446	16.2451	16.2306	16.7238	16.9306	16.6559	0.663357	0.0184578
PIGK	TC0100014638.hg.1	8.01568	7.94382	8.48875	8.92768	8.56401	8.94523	0.66289	0.0395957
KIAA1143	TC0300010903.hg.1	10.1456	10.4745	10.3273	10.8176	11.3053	10.813	0.662823	0.0351841
MYB	TC0600009534.hg.1	15.1499	15.1762	15.1224	15.8183	15.8682	15.7496	0.662563	0.000619649
RAB27B	TC1800007360.hg.1	3.811	5.24643	5.21434	5.73511	5.28966	5.23187	0.661623	0.295264
PRELP	TC0100011262.hg.1	3.3407	4.16651	3.88516	4.14705	4.64438	4.58494	0.661333	0.0949299
TMF1	TC0300011450.hg.1	5.92135	5.08573	5.65168	6.0492	6.28719	6.30462	0.660749	0.103392
CLGN	TC0400011973.hg.1	6.04949	6.54295	6.33519	6.65739	7.29685	6.95535	0.660654	0.0509238
NDUFAF6	TC0800012331.hg.1	8.30741	7.80189	9.29871	9.10959	9.2121	9.06706	0.660249	0.271359
SETDB2	TC1300007164.hg.1	8.15906	7.19629	7.11515	8.15766	7.88315	8.41025	0.660189	0.177713
C18orf42	TC1800007955.hg.1	4.08419	2.9365	3.61031	4.54933	4.22967	3.83252	0.660174	0.181392
PER2	TC0200016224.hg.1	5.93006	6.51878	6.47323	6.61911	7.1975	7.08579	0.660114	0.0637279
ZNF638	TC0200007999.hg.1	4.6964	4.19974	3.94373	4.71776	5.31009	4.7921	0.660023	0.0863295
FAM98B	TC1500006902.hg.1	9.67597	8.98258	9.69024	10.2659	9.773	10.2897	0.659947	0.0902826
ZNF788	TC1900007063.hg.1	4.22472	4.67393	4.97306	5.21876	5.16185	5.47055	0.659817	0.0765754
COPB1	TC1100013145.hg.1	7.87877	8.04826	7.74487	8.56126	8.6069	8.48251	0.65959	0.00889144
SMIM8	TC0600014151.hg.1	3.89197	3.64931	3.58663	4.66094	4.43444	4.01052	0.659327	0.0553462
ICK	TC0600012061.hg.1	8.83852	8.79962	8.73875	9.15359	9.43626	9.76257	0.658508	0.0609753
POGZ	TC0100015789.hg.1	3.42217	3.63678	5.35027	4.63587	5.0785	4.67011	0.658418	0.394162
ZMYM4	TC0100007765.hg.1	7.77106	7.58786	7.44416	8.38425	8.35219	8.04159	0.65832	0.0108814
UBXN2A	TC0200006951.hg.1	7.32438	7.34097	8.14249	8.172	8.43019	8.17854	0.657633	0.124839
GIMAP1-GIMAP5	TC0700013491.hg.1	6.47171	6.87177	6.51168	7.2116	7.75164	6.86446	0.657517	0.108945
ZNF525	TC1900008745.hg.1	4.92051	5.22675	5.31177	5.72973	5.64784	6.05335	0.657291	0.0186664
DLAT	TC1100009048.hg.1	6.38826	5.5748	7.28384	6.87142	7.43591	6.91141	0.657281	0.314461
BCAS2	TC0100018465.hg.1	9.82336	9.41976	9.32555	10.2476	10.2261	10.0654	0.656809	0.0369551
TGDS	TC1300009492.hg.1	9.83025	9.48326	9.63475	10.522	10.3167	10.0798	0.656731	0.0173651
NEDD4L	TC1800007411.hg.1	12.0603	11.6751	12.4514	12.6291	12.6441	12.8839	0.65672	0.0854222
ZNF799	TC1900011883.hg.1	7.39685	6.47004	6.70499	7.44725	7.08528	8.00947	0.656707	0.164923
ITSN2	TC0200011980.hg.1	8.12923	7.72187	7.40016	8.44303	8.29547	8.4816	0.65628	0.0808041
FAM175A	TC0400011208.hg.1	8.32529	8.7199	8.62139	8.82274	9.65195	9.16005	0.656053	0.0945724
CFDP1	TC1600011565.hg.1	6.81326	6.33693	6.34283	6.77785	7.32052	7.36231	0.655888	0.0575804
ZNF283	TC1900008240.hg.1	8.8048	8.8263	9.14648	9.82678	9.41826	9.50006	0.65584	0.0175173
LXN	TC0300012943.hg.1	5.69571	5.84391	5.37321	6.84008	6.05094	5.98925	0.655815	0.123453
USP45	TC0600012656.hg.1	5.94904	5.75272	6.28691	6.41857	6.67843	6.85886	0.65573	0.0331059
KIAA1107	TC0100009035.hg.1	4.22262	3.70287	4.10956	4.95766	4.02499	5.01924	0.655611	0.167516
HIST1H3F	TC0600011140.hg.1	13.9513	14.0396	14.3804	14.8021	14.8553	14.68	0.655423	0.0251731
EEPD1	TC0700007191.hg.1	4.29362	4.79768	4.79194	5.38152	4.99364	5.4741	0.655339	0.0430786
RPGR	TC0X00009387.hg.1	8.95232	7.85558	8.62908	9.22973	8.84264	9.33021	0.6552	0.170938
C2orf69	TC0200016589.hg.1	6.12394	6.39773	5.83255	7.18614	6.88732	6.24615	0.655131	0.127827
THRAP3	TC0100007798.hg.1	9.89468	9.79033	9.99601	10.4219	10.5974	10.6268	0.655038	0.00172321
IL31RA	TC0500007432.hg.1	3.01317	3.00836	3.49422	4.26594	3.75355	3.46046	0.654731	0.0920462
ZNF281	TC0100016887.hg.1	6.59775	7.0659	7.13031	7.58082	7.33245	7.84473	0.654682	0.0437883
KANSL1L	TC0200015601.hg.1	4.848	5.31676	5.43148	6.10696	6.00295	5.45027	0.654649	0.0741379
KLHL1	TC1300009204.hg.1	3.18371	3.37546	3.5146	3.31745	4.42851	4.2916	0.654598	0.196159
MED1	TC1700010571.hg.1	10.2445	10.1614	10.1501	11.0735	10.7905	10.6544	0.654147	0.0282216
ZEB1	TC1000007199.hg.1	8.37456	7.64574	8.01602	8.66146	8.63719	8.69907	0.653798	0.0887675
ZNF700	TC1900011667.hg.1	6.71314	8.18558	7.892	8.15044	8.55992	8.04115	0.653592	0.281122
CCK	TC0300010840.hg.1	5.06485	5.3975	5.57928	6.0049	6.04075	5.95674	0.653583	0.0460355
ADAD2	TC1600008640.hg.1	5.19571	4.89976	5.64408	6.41353	5.93681	5.34884	0.653214	0.165786
C10orf105	TC1000010955.hg.1	2.46083	2.77399	2.77206	3.13429	3.08905	3.7431	0.653188	0.0712909
PBK	TC0800009970.hg.1	7.65357	7.4907	7.14214	7.71136	8.59416	7.93827	0.652459	0.116671
IFT88	TC1300006503.hg.1	4.94356	3.96336	4.02657	5.50562	4.45112	4.93268	0.651976	0.212258
ZCCHC7	TC0900007143.hg.1	8.01996	8.39836	7.82719	8.29293	9.05652	8.8502	0.651382	0.0887329
USP8	TC1500007202.hg.1	7.21441	7.02671	7.67038	7.76154	7.8611	8.2416	0.650916	0.0577932
ESRRB	TC1400007725.hg.1	4.74104	4.66707	4.38864	5.37581	5.52931	4.84338	0.650584	0.0690282
MOB1A	TC0200013096.hg.1	12.7544	12.0605	12.4299	12.976	13.41	12.81	0.65042	0.0735004
EMC2	TC0800008531.hg.1	7.65307	7.73993	8.70905	8.75494	8.98433	8.31284	0.650019	0.189398
PNPLA7	TC0900012069.hg.1	3.02407	3.17232	2.94219	3.82155	3.54312	3.72361	0.649902	0.00398698
CREB1	TC0200010607.hg.1	9.52075	10.0648	9.78854	10.368	10.8091	10.145	0.649323	0.0632771
U2AF1	TC2100008286.hg.1	11.1727	11.2732	10.9011	11.6583	12.0111	11.6247	0.64903	0.0178488
FKBP3	TC1400009065.hg.1	6.34475	7.16411	7.29837	7.55907	7.59528	7.59897	0.648695	0.161215
FAM126B	TC0200015402.hg.1	8.48059	7.76049	7.56111	8.26364	8.71491	8.76935	0.648572	0.131984
ZNF717	TC0300011597.hg.1	5.3006	5.52474	5.41341	6.00006	6.46894	5.71483	0.648355	0.0881306
CCDC77	TC1200006444.hg.1	7.73567	6.97529	7.57013	8.14334	8.00534	8.0769	0.648164	0.102866
AQP2	TC1200007590.hg.1	4.39616	4.76605	5.12869	5.31571	5.7824	5.13628	0.64783	0.0867776
PRIMPOL	TC0400009503.hg.1	5.78733	5.04216	6.72187	6.5637	6.66332	6.26765	0.647773	0.312774
PIGU	TC2000008940.hg.1	4.75372	6.48632	5.73856	6.17501	6.13607	6.61066	0.647715	0.325248
TDO2	TC0400009090.hg.1	4.36716	3.63628	3.20899	4.07979	4.52474	4.55084	0.647645	0.186319
TGOLN2	TC0200013257.hg.1	8.74957	8.81425	9.08506	9.63951	9.83011	9.12192	0.647552	0.0734615
ZNF382	TC1900007947.hg.1	9.07408	8.22863	8.24961	9.3427	9.06632	9.0856	0.647435	0.135405
AR	TC0X00007493.hg.1	3.19336	3.70192	3.02147	3.5863	4.62927	3.64341	0.647409	0.192134
KIFAP3	TC0100016366.hg.1	8.26357	8.10234	8.00378	8.91131	8.76034	8.64023	0.647394	0.00404691
RFC3	TC1300006848.hg.1	5.49289	5.32321	5.29888	6.13538	6.36352	5.55745	0.647124	0.106427
DAB2	TC0500013301.hg.1	10.9236	10.5583	10.7065	11.364	11.2303	11.5353	0.647083	0.0101502
SNX2	TC0500008479.hg.1	11.0524	11.0529	10.8803	11.2604	11.6207	12.0457	0.64706	0.0962058
FAM109A	TC1200011931.hg.1	3.77302	3.28673	3.57236	4.1065	4.15719	4.30934	0.646977	0.0296124
JADE1	TC0400008680.hg.1	7.6581	7.35749	7.47127	8.07456	8.30118	8.05067	0.646515	0.00562904
CAST	TC0500013205.hg.1	6.03027	5.85931	6.20631	6.66239	6.70498	6.66774	0.646409	0.0215987
C2orf83	TC0200015929.hg.1	3.43123	4.08713	3.43417	4.00162	4.29448	4.59562	0.646392	0.0839517
KLHL23	TC0200016563.hg.1	8.74489	8.37639	8.87598	9.20447	9.17122	9.5607	0.646381	0.0308174
MIS12	TC1700006684.hg.1	8.11027	8.75292	8.69295	8.93609	9.43616	9.12287	0.646326	0.0685767
C5orf34	TC0500010641.hg.1	4.67311	5.20058	5.66285	6.19568	5.68231	5.59533	0.645593	0.143245
CNOT6	TC0500009725.hg.1	9.43623	9.09636	8.93468	9.74645	9.7302	9.92653	0.645305	0.033599
MBIP	TC1400008963.hg.1	9.8566	9.69113	10.4994	10.5537	10.7992	10.6295	0.645076	0.11045
ARHGAP28	TC1800006571.hg.1	4.17312	3.66383	3.99371	4.48548	4.7211	4.55926	0.645061	0.0327824
ALMS1	TC0200008047.hg.1	6.94525	6.29167	5.17766	6.97766	6.55037	6.82171	0.645055	0.337133
WTAP	TC0600010056.hg.1	11.7556	11.5419	12.0402	12.4334	12.4854	12.3534	0.644857	0.0390555
POLR2B	TC0400007617.hg.1	10.5391	10.5521	10.4315	11.2203	11.2408	10.9955	0.644667	0.00579895
RSBN1	TC0100015332.hg.1	9.5558	8.97091	9.4118	9.96056	9.93155	9.98031	0.644638	0.0661809
SBF2	TC1100010077.hg.1	8.56865	8.38658	8.41248	9.14614	9.03935	9.11584	0.644538	0.00181137
RTP1	TC0300009795.hg.1	2.86129	3.35425	3.03334	3.5135	3.79858	3.86983	0.644346	0.0265877
ABHD5	TC0300007194.hg.1	5.39672	4.9177	5.69144	6.09157	5.98815	5.85802	0.643959	0.0934401
ZNF136	TC1900007067.hg.1	5.4508	5.5927	5.48384	5.04916	6.91112	6.49737	0.643435	0.372402
CAMKV	TC0300011084.hg.1	3.27501	3.19998	3.5011	4.45789	3.48938	3.95834	0.643178	0.137936
ATP4A	TC1900010482.hg.1	4.00719	4.8941	4.18381	4.7569	5.05696	5.20045	0.643069	0.12586
TRPM6	TC0900010439.hg.1	3.342	3.64448	3.66826	4.00658	4.34708	4.22877	0.642563	0.0114422
JAK1	TC0100014457.hg.1	8.69701	8.51548	8.32596	8.8439	9.24848	9.37345	0.64246	0.0353662
ZUFSP	TC0600012971.hg.1	6.33863	5.94762	6.46331	6.87311	7.03614	6.76754	0.642412	0.0353796
AMD1	TC0600009127.hg.1	10.7337	10.1845	10.5627	11.2012	11.0301	11.1767	0.642397	0.0469423
GALNT7	TC0400009322.hg.1	6.6435	5.99172	6.64476	7.20124	7.0001	7.00563	0.642331	0.0873597
DNAJC28	TC2100007999.hg.1	4.39975	5.22479	4.87949	5.28409	5.54779	5.59867	0.642176	0.100103
ACTA1	TC0100017663.hg.1	8.56976	8.64508	9.04319	9.40661	9.39167	9.38608	0.642114	0.0483174
FOXJ1	TC1700011786.hg.1	3.72852	3.53541	4.06841	4.31928	4.40764	4.52976	0.641446	0.0401276
NCF1	TC0700008011.hg.1	3.68059	3.0257	3.55218	3.6027	4.57344	4.00636	0.641342	0.144679
CFAP97	TC0400012634.hg.1	8.65668	8.52131	8.11552	8.98374	8.99699	9.23614	0.641119	0.0398224
TAF15	TC1700007606.hg.1	5.30558	6.64374	6.54535	6.71753	6.75561	6.94484	0.641102	0.273481
RBM26	TC1300009330.hg.1	9.22401	9.46381	9.30411	9.87828	9.69091	10.3453	0.640839	0.0673659
ACTR2	TC0200007835.hg.1	12.8673	12.7289	13.0702	13.4956	13.5874	13.5052	0.640643	0.0167939
N4BP2	TC0400007306.hg.1	6.68299	6.57389	6.54463	6.94881	7.4338	7.34025	0.640451	0.0412329
DPYD	TC0100015023.hg.1	7.6227	6.83616	7.34237	7.54761	8.0965	8.07652	0.639798	0.0975811
WDFY1	TC0200015870.hg.1	6.2476	6.52055	6.46749	7.13063	6.94536	7.07851	0.639626	0.00495697
GPATCH4	TC0100016006.hg.1	9.62558	9.53888	9.88536	10.1343	10.4345	10.3991	0.639348	0.0106894
EIF2AK4	TC1500006930.hg.1	6.68495	6.2887	7.04782	7.25622	7.18938	7.49371	0.63928	0.0839285
TTC8	TC1400007915.hg.1	4.10494	4.9441	4.55405	5.77989	4.87756	4.8626	0.638989	0.178628
U2AF1	TC2100007492.hg.1	12.0587	12.403	11.8978	12.7314	12.8525	12.6922	0.638833	0.0397642
FSCN3	TC0700013457.hg.1	4.07188	3.84824	3.0399	4.27367	4.16131	4.44101	0.638661	0.17206
BIRC5	TC1700009043.hg.1	8.34368	9.47878	9.28339	9.81914	9.77081	9.43131	0.638471	0.202648
GTF2A1	TC1400009834.hg.1	9.99318	9.56229	9.89382	10.5077	10.4911	10.3654	0.638284	0.0287092
CPLX2	TC0500009566.hg.1	5.16671	5.21943	5.32321	5.41305	6.38451	5.8254	0.63787	0.148372
USP41	TC2200008036.hg.1	7.68036	7.29527	7.83826	7.99348	8.24368	8.48973	0.637667	0.042431
KCTD3	TC0100011592.hg.1	3.70627	4.74781	4.35637	4.88602	4.53148	5.30529	0.637445	0.172565
ULBP1	TC0600009821.hg.1	8.95698	9.57505	9.12265	9.86028	9.7863	9.91953	0.637142	0.0691
INPP5D	TSUnmapped00000290.hg.1	4.74143	3.71268	4.84962	4.68896	4.89258	5.63353	0.637114	0.243634
CNOT2	TC1200008162.hg.1	10.8918	10.7793	10.9584	11.4619	11.7808	11.2964	0.63652	0.0341261
COMMD1	TC0200007739.hg.1	5.35759	5.84301	6.49998	6.46434	6.67897	6.46662	0.63645	0.190062
ATG12	TC0500011759.hg.1	8.98014	8.65464	9.7656	9.59502	9.90676	9.8075	0.636299	0.186888
RAB39B	TC0X00011236.hg.1	2.30344	2.48244	2.82074	3.65538	3.27844	2.58163	0.63628	0.169689
TCF4	TC1800008750.hg.1	6.28842	6.68749	5.76796	6.81848	6.65151	7.1824	0.636175	0.124867
ZNF224	TC1900008252.hg.1	5.54962	6.08448	6.37129	6.5939	6.6328	6.68437	0.635222	0.116975
EPS8L2	TC1100006484.hg.1	4.96654	4.30614	4.91582	5.25495	5.16214	5.67701	0.6352	0.0796556
MRPS31	TC1300008696.hg.1	5.68541	6.61768	6.69928	6.96868	7.02612	6.91235	0.634931	0.18901
PLA2G16	TC1100011126.hg.1	5.84296	5.74048	5.77786	6.58556	6.34067	6.33967	0.634867	0.00928469
ZNF565	TC1900010517.hg.1	3.29893	4.50685	5.03177	5.06316	5.27939	4.39946	0.634822	0.351946
MAN2A1	TC0500008296.hg.1	6.06608	6.43153	7.03793	6.72382	6.60481	8.11096	0.634685	0.334413
MFAP1	TC1500009236.hg.1	6.09805	6.77753	6.03626	6.77893	7.02681	7.01009	0.634663	0.104089
FBXL5	TC0400012900.hg.1	6.19719	6.28001	6.55669	6.61251	7.21321	7.11175	0.634532	0.0548469
INCENP	TC1100007833.hg.1	10.1078	10.4437	10.6455	11.0145	11.1483	10.9376	0.63444	0.0417341
TXLNB	TC0600014350.hg.1	5.51922	5.62993	4.78714	5.68575	5.95175	6.20204	0.634416	0.123309
PAPD5	TC1600007811.hg.1	9.86459	9.4582	9.79181	10.1058	10.4688	10.4413	0.633753	0.0209358
NR2C1	TC1200011573.hg.1	9.06578	9.08911	9.07751	9.77103	9.83297	9.52898	0.633527	0.02031
SCAMP1	TC0500007868.hg.1	7.08214	7.9791	7.52572	8.17921	8.17726	8.13051	0.633341	0.133762
CALCA	TC1100010187.hg.1	6.14849	5.36101	5.28995	7.22399	5.5106	5.96468	0.63327	0.35441
PLEKHA5	TC1200007010.hg.1	6.50075	5.78153	6.43417	7.23396	7.01315	6.36886	0.633169	0.142656
NXN	TC1700009333.hg.1	8.63584	8.92032	8.7229	9.5383	9.21631	9.42342	0.632991	0.0076821
HSPD1	TC0200015349.hg.1	11.2808	11.7102	11.5199	12.0065	12.4921	11.9112	0.63296	0.0510945
DTX3L	TC0300008558.hg.1	8.02376	7.87679	7.94107	8.49107	8.76607	8.48216	0.632562	0.010444
RANBP9	TC0600010864.hg.1	12.1741	12.2598	12.3926	13.0365	12.8476	12.8387	0.632113	0.00221791
HIST1H4D	TC0600011134.hg.1	13.7778	13.4054	13.8253	14.3796	14.3077	14.2172	0.631997	0.0302519
LNPEP	TC0500008157.hg.1	9.79296	9.55039	9.5635	10.3641	10.1202	10.3179	0.63179	0.00438741
STK26	TC0X00008437.hg.1	10.062	9.74091	9.40874	10.3288	10.3432	10.4333	0.631224	0.0747866
ABCC4	TC1300009505.hg.1	7.40019	7.56015	7.78028	8.04774	8.49558	8.09044	0.631051	0.0275249
CCDC152	TC0500007267.hg.1	8.08456	7.8609	8.79184	8.52761	8.79879	9.30328	0.630793	0.158634
SCGB1C1	TC1100006436.hg.1	5.13454	6.84733	6.06202	6.1989	7.05506	6.68213	0.630734	0.338718
ZNF567	TC1900007950.hg.1	6.7047	5.49119	5.12619	6.21171	6.29393	6.70746	0.63034	0.316618
TLR7	TC0X00006625.hg.1	4.11341	3.66466	4.4136	4.78477	4.41153	4.88621	0.630282	0.0829692
POLQ	TC0300012164.hg.1	7.13478	6.72287	6.16183	7.59695	7.32463	6.98859	0.630232	0.144456
GPBP1	TC0500007465.hg.1	7.27562	7.44024	7.36649	8.12418	7.78211	8.06371	0.629218	0.0147706
SHQ1	TC0300011540.hg.1	9.83678	9.9244	10.1253	10.6814	10.7579	10.3342	0.629026	0.0209532
PHAX	TC0500008540.hg.1	9.72438	9.07024	9.81053	9.99264	10.1706	10.3279	0.628664	0.0994545
AGL	TC0100009191.hg.1	6.53542	6.45381	6.32329	6.72145	7.24717	7.22937	0.628489	0.0544087
CDC23	TC0500012163.hg.1	8.88063	9.08304	9.16171	9.46305	9.87097	9.67583	0.628155	0.0152394
VAPA	TC1800006656.hg.1	10.9849	10.6465	11.3886	11.632	11.7925	11.4792	0.62787	0.0832505
SLFN5	TC1700007585.hg.1	7.61082	8.1612	7.85669	8.36631	8.28595	8.8586	0.627385	0.0596662
EZH2	TC0700012960.hg.1	6.59858	5.9343	4.10424	6.02496	6.65482	5.8391	0.627255	0.495117
DNAL1	TC1400007653.hg.1	5.21528	5.79716	5.56228	6.25887	6.34317	5.85324	0.626851	0.051333
NSMCE2	TC0800008786.hg.1	9.04091	8.73645	9.0912	9.55477	9.56095	9.63287	0.626676	0.0251555
PSMD5	TC0900011385.hg.1	10.2506	9.73098	10.5817	10.8384	11.1388	10.465	0.626321	0.121636
CHORDC1	TC1100011930.hg.1	10.3323	9.90871	10.4363	10.797	10.8425	10.9157	0.625967	0.0548059
TERF1	TC0800007949.hg.1	11.3554	10.548	11.2668	11.692	11.5279	11.828	0.62592	0.122567
C3orf38	TC0300008018.hg.1	8.36875	8.15961	8.12071	8.57904	9.06821	8.87897	0.625719	0.0292648
GARNL3	TC0900012173.hg.1	5.45557	6.24371	5.57563	6.45653	6.49622	6.19856	0.62547	0.111768
TROVE2	TC0100011026.hg.1	7.01168	7.21724	6.96773	7.88557	7.52579	7.66165	0.625455	0.0106403
LANCL1	TC0200015608.hg.1	9.00171	9.1426	9.42265	9.59154	9.99822	9.85324	0.62534	0.0219623
GFOD1	TC0600010853.hg.1	4.48563	5.70508	5.79636	5.88892	5.97551	5.99846	0.625272	0.276656
WDR48	TC0300007083.hg.1	7.8758	8.33004	7.8543	8.57118	8.60246	8.7622	0.625231	0.0426085
METTL14	TC0400008547.hg.1	7.74268	6.63812	7.25482	7.94316	7.93057	7.63704	0.625048	0.18189
REV3L	TC0600012863.hg.1	4.90528	4.0975	5.45024	5.43687	5.57567	5.31561	0.625046	0.250303
ZNF257	TC1900007543.hg.1	7.59111	7.73113	7.60785	8.22409	8.20073	8.37888	0.624533	0.00117841
NPM1	TC0500009422.hg.1	13.3048	13.3057	13.7488	13.8881	14.1688	14.176	0.624503	0.0308713
SPATA6	TC0100014127.hg.1	4.80007	5.60917	5.34466	6.00034	5.60954	6.01705	0.624343	0.102247
ADNP	TC2000009440.hg.1	12.0686	11.8777	11.727	12.4975	12.4279	12.6207	0.624307	0.0102303
BBS7	TC0400011749.hg.1	7.81966	7.4633	7.51359	8.2045	8.26643	8.19849	0.62429	0.0267074
PNRC2	TC0100007344.hg.1	11.0646	10.9664	11.1443	11.7744	11.7335	11.5401	0.624213	0.00311876
MTPAP	TC1000012538.hg.1	9.31996	9.45612	9.53328	10.0273	10.3019	9.8523	0.624062	0.0253293
PCNXL4	TC1400010612.hg.1	9.73962	9.36933	9.21875	9.87266	9.94987	10.3771	0.623964	0.0472704
ADCY5	TC0300012206.hg.1	2.73117	3.48359	3.65161	4.01865	3.919	3.79983	0.623703	0.152794
ABCG4	TC1100009242.hg.1	4.24021	5.08608	4.69968	5.14437	5.67858	5.07378	0.62359	0.118891
PPTC7	TC1200011911.hg.1	7.52945	8.46275	8.41553	8.65704	8.96381	8.65761	0.623574	0.167095
CHUK	TC1000012585.hg.1	5.00217	4.97764	5.20914	5.64146	5.92792	5.49002	0.623483	0.0216965
ZNF79	TC0900008804.hg.1	6.03498	5.07918	5.23581	5.89201	6.21335	6.11495	0.623448	0.160694
LRRC20	TC1000010917.hg.1	6.45775	7.19621	7.08387	7.4552	7.39776	7.75521	0.623446	0.0956126
KPNA4	TC0300012970.hg.1	8.90179	9.27527	9.18281	9.72405	9.866	9.63976	0.623316	0.0145877
RNFT1	TC1700012440.hg.1	7.05117	7.6956	8.1817	8.26589	8.23548	8.29659	0.623163	0.197013
ZNF280B	TC2200008134.hg.1	7.74991	8.28196	8.16998	8.46783	8.74062	8.8609	0.6225	0.0404666
PIK3C2A	TC1100013148.hg.1	6.76539	5.97772	6.53404	6.729	7.11466	7.29882	0.621781	0.103802
DCAF13	TC0800008484.hg.1	10.1888	9.79275	9.95841	10.409	10.722	10.674	0.621645	0.0153136
MLNR	TC1300007158.hg.1	2.78877	2.9673	3.40518	3.59147	3.50472	3.92888	0.621274	0.0566141
IDE	TC1000011427.hg.1	6.01328	5.63498	5.9404	6.41024	6.09512	6.94553	0.620745	0.113554
ADAR	TC0100015921.hg.1	8.39826	8.49468	8.76968	9.09972	9.45051	8.97326	0.620293	0.0291431
SERPINB13	TC1800007547.hg.1	3.5392	4.34617	3.70045	4.37166	5.00738	4.06654	0.619919	0.170956
MIB1	TC1800006841.hg.1	5.09418	4.13132	5.03046	5.48058	5.48799	5.14661	0.619739	0.17501
SIGLEC14	TC1900011266.hg.1	2.98644	3.46198	3.72336	3.75353	4.45755	3.81984	0.619716	0.117455
SUV39H2	TC1000006859.hg.1	6.6483	6.73161	6.2484	7.28291	7.01443	7.18994	0.619653	0.034236
CXorf57	TC0X00008052.hg.1	8.271	8.15381	8.41429	8.8536	9.03743	8.80698	0.619638	0.00391142
LCE3B	TC0100009996.hg.1	5.08766	6.02718	6.04882	6.51948	6.21268	6.29035	0.619618	0.182613
FAM120B	TC0600010331.hg.1	4.37276	5.5465	5.41839	5.69278	5.86826	5.63514	0.619509	0.23491
CDK5RAP3	TC1700012277.hg.1	10.8385	10.8799	10.9896	11.5282	11.6849	11.3532	0.619437	0.011528
ALDH2	TC1200012707.hg.1	7.63197	7.71805	7.36645	7.91533	8.91544	7.74374	0.619343	0.22708
PLEKHH2	TC0200007399.hg.1	5.42839	6.11416	6.3962	6.21821	6.26143	7.31709	0.619329	0.252677
GAN	TC1600008580.hg.1	8.34734	7.84132	8.03017	8.41939	8.74289	8.91295	0.618802	0.0402431
HIST1H2AB	TC0600011125.hg.1	11.6523	11.9198	12.3382	12.6781	12.8783	12.2097	0.618617	0.0926941
MSH6	TC0200016445.hg.1	7.53204	7.10311	6.55747	7.90905	7.26064	7.87848	0.618517	0.159674
ZNF100	TC1900010158.hg.1	10.5013	10.3832	10.6486	11.1185	11.1581	11.1118	0.61845	0.0127507
ATF1	TC1200007622.hg.1	9.82651	9.74547	10.1845	10.6067	10.4076	10.5962	0.618024	0.0279431
AFF4	TC0500012032.hg.1	8.78972	8.61848	8.60898	9.50422	9.28659	9.07941	0.61768	0.0219432
KMT2A	TC1100009207.hg.1	8.79308	8.40788	8.24605	8.99931	9.00581	9.29477	0.617628	0.0414088
NEDD9	TC0600010810.hg.1	3.68125	3.26275	3.95193	4.08204	4.36202	4.3042	0.617446	0.0745429
SLF1	TC0500008107.hg.1	5.20513	5.9774	5.60808	6.03288	6.52182	6.08743	0.617176	0.0935234
DHX29	TC0500010760.hg.1	6.89478	6.69895	6.72098	7.15642	7.73077	7.27851	0.616998	0.0584774
XPOT	TC1200008002.hg.1	12.6388	12.6848	12.7229	13.1989	13.3664	13.3315	0.61677	0.00202364
CCNB2	TC1500007392.hg.1	11.5032	11.0003	11.4927	12.1188	12.0072	11.72	0.616607	0.0444111
C2CD5	TC1200010119.hg.1	7.86383	7.94977	7.76386	8.56573	8.22598	8.63553	0.616595	0.0257733
GABPB1	TC1500009386.hg.1	9.84258	9.64631	9.75391	10.3956	10.5112	10.1852	0.616403	0.00922901
CD244	TC0100016145.hg.1	4.43503	4.50733	3.90544	5.39906	4.75057	4.54669	0.616173	0.132102
CXorf66	TC0X00010970.hg.1	2.75065	3.06277	2.47537	3.46419	3.23689	3.43597	0.616088	0.0519048
CCDC66	TC0300007557.hg.1	4.42326	5.21202	5.86038	5.27132	6.43261	5.63795	0.615408	0.319108
TCHP	TC1200012705.hg.1	3.48521	3.66296	3.90857	3.98986	4.80551	4.10713	0.615256	0.12137
ZNF766	TC1900008691.hg.1	7.48202	7.44367	7.73118	8.10186	7.94481	8.45459	0.614796	0.0344609
SMARCE1	TC1700012401.hg.1	11.1485	11.4076	11.1538	11.6729	12.2547	11.6257	0.614487	0.076881
ANXA5	TC0400011744.hg.1	6.26945	6.74613	6.78758	7.2584	7.49131	6.89413	0.613561	0.0633339
FYB	TC0500010553.hg.1	14.1047	13.7497	13.7196	14.1988	14.6014	14.6135	0.61324	0.0294413
CDK19	TC0600012839.hg.1	7.91902	8.21338	7.7783	8.67879	8.66642	8.40518	0.613225	0.021302
TAB2	TC0600009789.hg.1	8.36576	8.80954	9.10389	9.29155	9.35775	9.46924	0.613121	0.0963677
SLC37A2	TC1100009408.hg.1	3.59768	4.00408	3.83773	4.44046	4.0687	4.76928	0.61298	0.0736673
PKN2	TC0100008955.hg.1	9.02785	9.04277	9.10256	9.78019	9.83488	9.39655	0.612811	0.0438116
SH2D4A	TC0800006916.hg.1	3.49727	2.85865	3.49383	3.61873	4.61859	3.45062	0.612732	0.236422
FAM135A	TC0600008468.hg.1	5.63615	7.17232	6.27922	6.80174	7.21477	6.90784	0.612216	0.301321
ATXN1	TC0600010936.hg.1	4.84756	5.39596	5.24607	5.29899	6.02128	6.00565	0.612109	0.110431
PAM	TC0500008229.hg.1	4.60607	4.91734	5.69042	5.74109	5.53041	5.77837	0.612014	0.192947
DHFR	TC1800008333.hg.1	12.1671	12.0255	12.1152	12.5664	12.8586	12.7183	0.611833	0.00808356
C1QTNF3	TC0500013298.hg.1	4.59572	5.40496	4.90068	5.40508	5.59806	5.73347	0.61175	0.107432
ZMAT1	TC0X00010375.hg.1	6.30336	7.03456	6.44346	7.22547	7.06296	7.32817	0.611739	0.099541
TYW5	TC0200015377.hg.1	5.79411	5.64265	6.48113	6.37095	6.657	6.72501	0.61169	0.127161
MCPH1	TC0800006557.hg.1	7.74058	8.29159	8.13991	8.6939	8.72587	8.58656	0.611413	0.0573895
EIF4G3	TC0100013194.hg.1	11.1761	10.626	10.9857	11.7259	11.0449	11.8511	0.611333	0.121362
SRR	TC1700006546.hg.1	12.1482	11.0534	11.6539	12.1353	12.5311	12.0227	0.61121	0.184151
PCSK5	TC0900007618.hg.1	3.78888	3.50503	4.31588	4.75086	3.74994	4.94195	0.610987	0.248171
PABPC1	TC0800012444.hg.1	14.495	14.4982	14.5912	15.0294	15.1883	15.1988	0.610687	0.00180569
CSPP1	TC0800007870.hg.1	5.52316	5.3469	6.6309	6.57353	6.56057	6.19816	0.610432	0.264689
LINC01272	TC2000007686.hg.1	4.03557	3.81159	3.91722	4.24631	4.50909	4.83997	0.61033	0.0566018
FLOT1	TC0600011385.hg.1	3.2919	2.89386	3.69385	3.9518	4.12391	3.63479	0.610294	0.101293
ADAM17	TC0200011688.hg.1	7.53809	7.97176	8.3405	8.41165	8.92817	8.34103	0.610163	0.112305
LPGAT1	TC0100017223.hg.1	6.06985	6.03277	6.7771	6.63469	7.27522	6.79902	0.60974	0.12346
MLKL	TC1600010859.hg.1	6.31046	7.38746	7.26146	7.74679	7.32851	7.71222	0.60938	0.207495
PRR34	TC2200009000.hg.1	4.38744	4.8215	4.55632	5.10876	5.05178	5.43254	0.609271	0.0246853
ATP11B	TC0300009651.hg.1	5.76648	5.40572	5.34552	6.05485	5.71819	6.57245	0.609257	0.117587
ZNF564	TC1900011886.hg.1	6.55296	6.9465	6.87314	7.42333	7.44026	7.33636	0.609116	0.0302637
MED12L	TC0300009179.hg.1	8.01816	7.66208	8.79891	8.78152	8.80294	8.72169	0.608995	0.21082
RPAP2	TC0100009040.hg.1	5.81403	6.81193	6.76688	6.81279	7.20804	7.19873	0.608902	0.19365
ZNF451	TC0600008348.hg.1	10.0226	9.73209	9.4823	10.2606	10.4969	10.3056	0.608705	0.042335
KCNH6	TC1700008561.hg.1	3.29766	3.48319	3.0704	4.34638	3.62054	3.70996	0.608545	0.0988994
NKAIN2	TC0600009343.hg.1	5.37974	5.2828	4.86538	5.51146	5.94444	5.89707	0.608349	0.0447081
GOLGA8A	TC1500008988.hg.1	7.16553	7.31587	7.32597	8.0437	7.92441	7.66322	0.607987	0.0187047
SPIN3	TC0X00009836.hg.1	5.26125	5.39874	4.89821	5.40095	5.65355	6.32603	0.607442	0.146049
ATAD5	TC1700007469.hg.1	6.59007	7.82876	7.1788	7.97234	7.49325	7.9536	0.607183	0.226225
APOL4	TC2200008589.hg.1	2.39763	3.24939	2.92359	3.49049	3.37987	3.52176	0.607172	0.130322
MBNL2	TC1300007774.hg.1	7.13846	8.25863	7.21377	8.04207	8.38966	7.99976	0.60688	0.229617
ACBD5	TC1000010117.hg.1	7.03564	6.48574	7.29796	7.54013	7.57922	7.51918	0.606398	0.126034
PUM2	TC0200011901.hg.1	10.5517	10.5656	10.849	11.4048	11.2783	11.1023	0.60638	0.00996072
PPP2R5C	TC1400008333.hg.1	12.5751	12.2921	12.4572	12.969	13.0712	13.1033	0.606363	0.00762052
METTL8	TC0200014899.hg.1	8.85637	8.91121	9.14339	9.48443	9.45011	9.79426	0.605944	0.013781
DMXL1	TC0500008431.hg.1	7.41822	7.40107	7.60937	8.00995	8.27957	7.95641	0.605759	0.010396
FAM45A	TC1000009063.hg.1	9.07916	8.57925	9.0589	9.32041	9.92398	9.2902	0.605758	0.0863187
EXOC4	TC0700009211.hg.1	10.0944	10.4478	10.546	10.871	11.1151	10.9194	0.605733	0.028762
BHMG1	TC1900008345.hg.1	3.19703	3.719	3.55447	4.02231	4.20953	4.05522	0.605524	0.0454241
RAD21	TC0800011565.hg.1	12.5115	12.461	12.4531	13.0596	12.8691	13.3135	0.605507	0.0399839
AGAP6	TC1000007598.hg.1	9.94977	10.0629	9.74959	10.6417	10.3341	10.6022	0.605288	0.0105177
NAPEPLD	TC0700012115.hg.1	6.82365	6.6719	6.73462	7.4593	7.16263	7.42302	0.604925	0.0114714
RBL2	TC1600007887.hg.1	10.0325	9.74597	10.0063	10.5121	10.6121	10.4752	0.60491	0.0114145
JADE3	TC0X00007119.hg.1	8.91611	8.61554	8.80719	9.40266	9.49384	9.25652	0.604723	0.00659087
HP1BP3	TC0100013193.hg.1	10.7597	10.703	10.9139	11.3043	11.6152	11.2708	0.60456	0.0150896
KIRREL3	TC1100012750.hg.1	3.26449	4.3353	4.68783	4.5983	4.53082	4.97174	0.604414	0.291348
CASD1	TC0700008360.hg.1	9.67708	9.93839	9.8804	10.1762	10.6429	10.4895	0.604248	0.0283565
EPC1	TC1000010256.hg.1	5.60313	6.01379	6.00256	5.90578	6.81687	6.70943	0.604196	0.158379
PPCDC	TC1500007866.hg.1	8.79878	8.74074	9.35314	9.3749	9.8803	9.44946	0.604	0.0765583
ADAMDEC1	TC0800007042.hg.1	3.11994	3.505	4.23226	4.28968	3.79327	4.5854	0.603714	0.21305
RAD21	TC0800011566.hg.1	7.88929	7.8296	8.01174	8.60816	8.04785	8.88547	0.603615	0.128113
NCKAP1	TC0200016757.hg.1	5.92425	6.03877	6.3533	7.03551	6.77353	6.31735	0.60336	0.0833878
USP16	TC2100006852.hg.1	7.67226	7.26496	7.52785	7.85959	8.10975	8.30512	0.603129	0.0266828
APOL6	TC2200007214.hg.1	7.1865	6.75202	7.17174	7.54586	7.86327	7.50945	0.602776	0.0317218
ANKHD1	TC0500008854.hg.1	9.20587	9.11506	9.0135	9.71382	9.76985	9.65841	0.602548	0.00194644
METTL18	TC0100016363.hg.1	4.34898	4.56895	3.97329	4.7292	5.18872	4.78082	0.602505	0.0583345
KIF27	TC0900010582.hg.1	4.108	4.75231	4.48476	5.38899	4.75903	5.00393	0.602298	0.0829131
ZNF20	TC1900011875.hg.1	3.96986	5.14804	5.15505	5.03936	5.53784	5.50244	0.602226	0.263096
ZNF845	TC1900008746.hg.1	6.20323	6.92154	6.65006	7.10283	7.35209	7.12616	0.602088	0.0882538
ACER3	TC1100008518.hg.1	6.39322	5.84478	7.03631	7.0159	6.53386	7.53064	0.602032	0.252917
PRKAA1	TC0500010580.hg.1	11.5532	11.302	11.0985	11.9148	12.0976	11.7474	0.602023	0.0247417
LEP	TC0700009036.hg.1	2.94521	3.21548	2.54838	3.43081	3.36457	3.71951	0.601944	0.0694739
UTP20	TC1200008606.hg.1	5.80273	4.27969	5.62902	5.83832	5.82233	5.85627	0.601832	0.33763
VDAC3	TC0800007440.hg.1	10.6578	10.9484	11.3381	11.3259	11.6405	11.7834	0.601823	0.0735376
ZNF253	TC1900007456.hg.1	8.87387	9.16652	8.61356	9.39039	9.55737	9.51053	0.601446	0.0531649
DNAJC27	TC0200011992.hg.1	6.6566	5.44251	6.4812	6.57599	7.27157	6.53658	0.601276	0.262598
STYX	TC1400007172.hg.1	10.9635	10.8434	11.1623	11.7119	11.5447	11.5161	0.60118	0.00854459
HEY2	TC0600009362.hg.1	6.61046	6.55695	6.2074	7.63241	6.96582	6.5789	0.600774	0.180399
PTPRG	TC0300007645.hg.1	5.656	5.35516	5.75496	5.99566	6.23217	6.34036	0.600693	0.0198392
KBTBD2	TC0700010687.hg.1	8.48864	7.77377	8.50028	8.65918	9.14955	8.75599	0.600682	0.114501
ABCG2	TC0400011279.hg.1	2.87169	4.17209	4.46823	5.00205	4.02753	4.2838	0.600457	0.364303
SRSF11	TC0100008692.hg.1	9.41931	9.48678	9.9529	9.95245	10.1705	10.537	0.600294	0.0661149
RP11-484D2.4	TC1100007367.hg.1	8.74925	8.51972	8.69393	9.0739	9.26352	9.42613	0.600218	0.0112262
ZNF780A	TSUnmapped00000222.hg.1	5.84856	4.03279	5.43251	5.33288	5.85192	5.92922	0.60005	0.391911
ASB10	TC0700013063.hg.1	4.78761	5.38279	4.96758	5.39932	5.95295	5.58581	0.600033	0.0670096
RCHY1	TC0400011040.hg.1	6.20666	5.66345	6.33824	6.4926	6.52484	6.99052	0.599866	0.0876944
MED13L	TC1200012043.hg.1	11.3661	11.456	11.3238	11.9333	12.0456	11.9665	0.599833	0.000349474
CLEC4D	TC1200006721.hg.1	2.44057	2.71063	2.3323	3.26028	3.49051	2.53082	0.599372	0.163318
TBC1D4	TC1300009271.hg.1	7.93956	7.74209	8.51531	8.32788	9.04	8.62508	0.598663	0.127092
AADACL3	TC0100006903.hg.1	3.98304	3.12278	3.05714	3.53192	4.23209	4.19482	0.59862	0.190691
ZNF862	TC0700009647.hg.1	5.39253	5.74561	5.52595	6.09216	6.36112	6.00664	0.598612	0.0157024
PIK3R4	TC0300012426.hg.1	8.31993	7.37154	7.09639	8.22718	8.31813	8.03838	0.598607	0.244519
KDM6A	TC0X00007075.hg.1	6.76412	7.5949	6.91453	7.98886	7.60116	7.4793	0.598587	0.130523
BRWD3	TC0X00010169.hg.1	5.03945	5.28844	4.61231	5.43279	5.55215	5.75046	0.598399	0.0755739
TRMT10A	TC0400011414.hg.1	5.5095	6.03117	5.53025	6.2379	6.26884	6.35913	0.59832	0.0666742
STXBP5	TC0600009753.hg.1	4.2534	4.8778	4.22922	5.01105	5.06999	5.07339	0.598005	0.104988
ZNF800	TC0700013615.hg.1	8.89962	8.5838	8.43584	8.89397	9.40458	9.41356	0.597617	0.0557427
BUB3	TC1000009172.hg.1	13.6107	13.7155	13.9564	14.4607	14.3674	14.2464	0.59726	0.0123233
TESPA1	TC1200010850.hg.1	10.0997	10.1391	9.68258	10.4402	10.5588	10.7134	0.59702	0.0353488
BIRC6	TC0200007188.hg.1	4.26348	4.89344	6.0634	5.83892	5.47815	5.69368	0.59681	0.375288
FARSB	TC0200015838.hg.1	12.2783	12.4413	12.7314	13.2303	13.0287	12.9819	0.596653	0.0266643
NUBPL	TC1400010592.hg.1	6.21775	6.45598	6.66848	6.86815	7.19728	7.06594	0.596384	0.0243787
FAM133B	TC0700011782.hg.1	6.28953	6.4229	5.58793	6.96448	6.75645	6.36592	0.5955	0.139422
FAT4	TC0400008641.hg.1	3.77068	3.70896	4.53163	4.78477	4.43088	4.58201	0.595467	0.141035
SPEF2	TC0500007136.hg.1	4.81223	4.06421	4.1381	5.10382	4.69453	5.00212	0.595307	0.11289
ANKRD28	TC0300010413.hg.1	8.80973	8.61618	8.60886	9.18093	9.11222	9.52721	0.595195	0.0261368
GDF10	TC1000007543.hg.1	3.67716	3.85228	3.33767	4.67893	4.0017	3.97167	0.595067	0.108232
GUF1	TC0400007399.hg.1	9.08336	8.86971	9.08573	9.74506	9.26441	9.81272	0.594461	0.0587632
RFC3	TC1300006847.hg.1	11.5994	11.1275	11.5968	11.8164	12.1678	12.1228	0.594457	0.0419286
ZNF844	TC1900007061.hg.1	5.91687	5.79865	6.20195	6.24208	6.69777	6.75942	0.593932	0.0473702
TCEB3CL2	TC1800008607.hg.1	4.2917	4.9294	4.57483	5.4061	5.27638	4.89475	0.593764	0.0707007
KIAA0513	TC1600008675.hg.1	5.4163	4.88155	4.7695	5.64921	5.81617	5.38215	0.593391	0.077307
ECD	TC1000011012.hg.1	11.8099	11.4641	11.5313	12.3967	12.0819	12.1066	0.593297	0.0154977
DNM2	TC1900006999.hg.1	10.4278	10.2816	10.8907	10.885	11.1697	11.3245	0.59303	0.0641927
C6orf62	TC0600011071.hg.1	11.0063	10.8865	11.1006	11.6536	11.5844	11.5345	0.593003	0.00303507
2007-09-01	TC0700007178.hg.1	9.28934	8.95686	8.99282	9.62854	9.52445	9.86392	0.592628	0.0152676
FAM21A	TC1000007603.hg.1	10.2374	9.89749	10.212	10.77	10.755	10.5983	0.592123	0.017512
HIST1H1C	TC0600007266.hg.1	9.00308	8.57239	7.94629	8.81761	9.94505	8.5348	0.5919	0.331867
POC5	TC0500011173.hg.1	8.53648	8.52215	8.15311	9.35832	8.4253	9.20274	0.591537	0.165761
HNRNPU	TC0100018569.hg.1	15.3074	15.0472	15.4305	15.6714	15.9383	15.9489	0.591193	0.0165597
CLASP2	TC0300010680.hg.1	4.30036	3.64868	4.92089	5.30839	4.76822	4.56689	0.591189	0.254464
NGLY1	TC0300010544.hg.1	8.79042	8.21796	8.79776	9.08363	9.42117	9.07475	0.591133	0.0708905
C1orf61	TC0100018511.hg.1	3.24922	2.90828	2.80707	3.53116	3.7664	3.44011	0.591032	0.0271015
UBA3	TC0300011452.hg.1	11.5222	11.4572	11.4278	11.8938	12.294	11.992	0.590837	0.0335314
GATAD2A	TC1900007438.hg.1	2.90243	3.89064	3.29124	3.67824	3.84507	4.3333	0.590773	0.174331
SPAG5	TC1700012380.hg.1	5.91025	5.78729	6.125	6.46947	6.441	6.68343	0.590452	0.0105474
FANCI	TC1500008252.hg.1	7.94851	7.57183	7.87005	8.27492	8.35469	8.53131	0.590179	0.0172765
POGZ	TC0100015792.hg.1	5.89429	5.55922	6.168	5.69595	6.82306	6.87254	0.590013	0.262971
ZNF19	TC1600011562.hg.1	10.9584	11.1778	11.0581	11.6303	11.4228	11.9109	0.589897	0.0365443
ZNF506	TC1900011914.hg.1	7.41784	7.93429	8.00014	8.12983	8.45315	8.53864	0.589782	0.0649968
PEF1	TC0100013574.hg.1	3.32929	3.78314	4.13549	4.56043	4.34617	4.11031	0.589667	0.110579
UCHL3	TC1300009979.hg.1	9.98601	9.82885	10.0985	10.7031	10.6162	10.362	0.589311	0.011936
C16orf87	TC1600010175.hg.1	8.26472	7.1361	7.46338	8.29442	8.40996	7.92758	0.589255	0.214196
ZNF485	TC1000007427.hg.1	6.33827	6.77017	6.83177	7.41368	7.19569	7.09762	0.588928	0.0417865
GDAP2	TC0100015434.hg.1	9.23015	8.79695	8.96508	9.70026	9.33461	9.72324	0.588645	0.0298301
BHLHA9	TC1700006499.hg.1	3.78885	3.3036	3.80736	3.98691	4.53545	4.14269	0.588415	0.0642573
SAV1	TC1400009139.hg.1	4.30943	3.97816	3.49816	4.64652	4.88687	4.01743	0.588357	0.168915
MEGF11	TC1500009813.hg.1	4.56864	4.31459	5.67891	5.14436	5.53925	5.64333	0.588271	0.29399
PTGER1	TC1900009822.hg.1	5.63105	6.18365	5.94234	6.0054	6.56896	6.94671	0.588011	0.15403
INPP5D	TSUnmapped00000524.hg.1	4.30966	4.60098	4.33196	5.07657	5.00827	4.92176	0.587997	0.0122556
RCAN3	TC0100007370.hg.1	6.75537	6.92613	6.77285	7.35796	7.28587	7.57449	0.587996	0.00763103
KLRAP1	TC1200009910.hg.1	2.32951	4.35522	3.66009	4.17145	4.01982	3.91722	0.587886	0.427099
PEX5L	TC0300013275.hg.1	6.70357	5.78478	5.88117	6.73184	6.56855	6.83258	0.587816	0.174807
CECR1	TC2200007894.hg.1	6.16524	5.77108	5.88092	6.77611	6.22429	6.58008	0.587748	0.047279
SYCN	TC1900010644.hg.1	3.46605	3.45456	3.22358	4.00451	4.00798	3.89481	0.587707	0.00789905
CMSS1	TC0300008133.hg.1	6.10651	6.71472	7.20647	7.37326	6.71626	7.70098	0.587603	0.244268
ZC3H14	TC1400007906.hg.1	9.35861	8.87538	9.5603	10.0063	9.65604	9.89381	0.587279	0.0829185
APOL3	TC2200008588.hg.1	4.31752	4.77643	4.62791	5.47489	5.22511	4.78204	0.586731	0.0830945
RNF168	TC0300013703.hg.1	10.1188	9.87076	10.1005	10.2404	10.8147	10.7942	0.58638	0.0726896
NBPF9	TC0100015680.hg.1	5.72929	5.69677	5.79684	6.3297	5.99427	6.65795	0.586341	0.0889513
PRODH	TC2200007953.hg.1	4.61152	4.50649	4.68785	5.01369	4.89728	5.65264	0.585918	0.123847
OPA1	TC0300009897.hg.1	7.34044	6.92213	7.10019	7.31857	7.85773	7.94351	0.585681	0.0758479
ZNF254	TC1900007622.hg.1	9.73438	9.62383	9.88037	10.1359	10.4224	10.4369	0.585545	0.0105693
GPCPD1	TC2000008299.hg.1	4.92927	4.7075	5.31094	5.23903	5.55098	5.91398	0.585429	0.0905743
MFSD6	TC0200010264.hg.1	9.87123	9.57237	9.79505	10.3363	10.3777	10.2805	0.585286	0.0157718
RNF19A	TC0800011249.hg.1	3.78164	3.05004	3.71598	3.99596	4.82409	3.48325	0.585218	0.282067
XRCC5	TC0200010729.hg.1	7.73182	7.56619	7.98315	8.37863	8.36769	8.29037	0.585177	0.0347782
ZNF107	TC0700013370.hg.1	9.25148	9.25015	8.84392	9.46517	9.96553	9.66992	0.58502	0.0424651
FRMD6	TC1400007145.hg.1	4.26893	4.02501	4.39536	4.13593	5.4545	4.85389	0.585009	0.261139
HIST1H3B	TC0600011124.hg.1	14.813	15.22	15.0846	15.4554	15.879	15.5376	0.584793	0.0298354
GPC6	TC1300007718.hg.1	5.83724	6.2913	5.79061	6.47608	6.49461	6.70176	0.58444	0.0496647
BCAS3	TC1700008499.hg.1	7.09538	6.40399	6.54355	6.96137	7.31768	7.51582	0.583988	0.097807
LNP1	TC0300008147.hg.1	3.7497	3.69889	3.30773	4.22122	3.81137	4.47565	0.583974	0.0769536
ACAP2	TC0300013636.hg.1	4.16234	4.9638	5.61634	5.4998	5.09448	5.90003	0.583946	0.308168
RBM11	TC2100006585.hg.1	5.3647	5.16304	5.94369	5.68001	6.05506	6.48818	0.58394	0.152042
S100A5	TC0100015865.hg.1	3.90568	4.12986	4.29567	4.92416	4.65374	4.50434	0.583679	0.0252535
GTF3C6	TC0600009140.hg.1	8.942	9.34726	9.72432	10.198	9.78739	9.77923	0.583675	0.106253
C19orf67	TC1900009804.hg.1	3.41608	2.99232	3.40348	3.57986	4.11759	3.86519	0.583587	0.0495753
PMS1	TC0200010255.hg.1	7.00082	7.06679	7.53046	7.73651	7.80475	7.80724	0.583475	0.0701222
C20orf196	TC2000006622.hg.1	7.67057	8.10783	8.3984	9.02947	8.36613	8.53156	0.583452	0.115393
FAM208B	TC1000006633.hg.1	4.52875	3.45399	5.30925	4.46734	6.01977	4.55502	0.58338	0.472931
LSG1	TC0300013609.hg.1	10.6937	10.379	10.8604	11.1654	11.3582	11.1596	0.58335	0.03681
NBPF12	TC0100009770.hg.1	9.13366	8.949	8.85333	9.56042	9.34289	9.78234	0.583221	0.0241862
UNC13C	TC1500007294.hg.1	4.27376	3.82047	3.61268	3.96654	5.02852	4.46133	0.583158	0.196603
RNF130	TC0500013429.hg.1	8.56663	8.53688	8.25294	9.25507	8.76815	9.08151	0.58276	0.0337852
ARG2	TC1400007500.hg.1	9.75364	9.63987	9.81839	10.4487	10.1342	10.3767	0.582573	0.0115791
ANKRD7	TC0700008898.hg.1	4.54099	4.2825	4.69965	5.70701	4.532	5.03161	0.582492	0.223122
TUBB4A	TC1900009433.hg.1	8.9497	8.98847	8.98489	9.22223	9.44624	10.0019	0.582424	0.128106
MSANTD4	TC1100012186.hg.1	7.30572	7.61324	8.18698	8.2764	8.26384	8.31221	0.582174	0.152466
DOCK1	TC1000009276.hg.1	3.0307	3.16429	3.38025	3.89288	3.98686	3.44203	0.582173	0.052933
CCDC24	TC0100008084.hg.1	3.57684	4.23383	4.35965	4.55481	4.49687	4.86513	0.582165	0.123311
STC1	TC0800009891.hg.1	6.69805	5.13843	6.22125	6.42322	6.60966	6.77061	0.581922	0.333729
PLA1A	TC0300008484.hg.1	3.38271	3.03929	4.11909	4.37697	3.73604	4.17368	0.581871	0.207207
KLHDC8A	TC0100017066.hg.1	2.91433	2.67809	3.215	3.64092	3.63948	3.27157	0.581519	0.0453715
HSP90AA1	TC1400010257.hg.1	9.82934	10.2321	9.65546	10.0626	10.5248	10.8738	0.58145	0.12255
RB1CC1	TC0800010427.hg.1	5.71623	4.67696	4.8699	5.872	5.53157	5.60336	0.581279	0.20326
SMARCA5	TC0400008882.hg.1	8.61425	8.65078	8.86627	9.21159	9.33055	9.33276	0.5812	0.0073333
NUTM1	TC1500006822.hg.1	4.22587	5.17023	4.73818	5.71098	5.45885	4.70751	0.581021	0.22689
TMEM99	TC1700007811.hg.1	7.73524	8.04874	7.78498	8.60337	8.41074	8.29724	0.580795	0.0119061
ZNF615	TC1900011281.hg.1	6.01747	5.37447	5.24548	6.11003	5.93081	6.33835	0.580589	0.119738
PSMC3IP	TC1700010731.hg.1	7.15664	7.92997	8.3748	8.4159	8.15982	8.62499	0.579769	0.239898
ATP10D	TC0400007422.hg.1	3.73917	4.07616	4.28832	4.56079	4.23395	5.04802	0.579703	0.121849
NIPBL	TC0500007163.hg.1	7.3555	7.41992	7.46052	8.05826	7.6467	8.26975	0.57959	0.0830012
COL4A3BP	TC0500011163.hg.1	8.54847	7.83785	8.05149	8.84008	8.71376	8.62264	0.579554	0.100205
SPPL2C	TC1700008080.hg.1	3.0044	3.03227	2.54049	3.40237	3.33735	3.57519	0.579251	0.0508762
FTSJ3	TC1700011423.hg.1	6.00013	5.86206	6.18678	6.33572	6.85917	6.5906	0.578837	0.0405343
NUP205	TC0700009253.hg.1	6.68232	6.41559	6.17489	7.20993	6.88506	6.91418	0.578793	0.0373769
ZNF43	TC1900010163.hg.1	9.41713	9.09599	9.18531	9.64539	9.86267	9.92666	0.57876	0.0110057
MMAA	TC0400008912.hg.1	7.41737	7.71413	7.20073	7.96662	8.1213	7.97977	0.578488	0.0486275
ZNF426	TC1900009586.hg.1	7.34707	6.95785	7.26321	7.96336	7.64018	7.70004	0.578484	0.0210983
EIF5	TC1400008395.hg.1	14.4074	14.566	14.5181	15.2042	15.2208	14.8013	0.578267	0.0403149
SUGT1	TC1300007251.hg.1	7.46809	7.46125	7.63309	8.04091	8.22235	8.03079	0.577205	0.00242303
DNAJC24	TC1100007184.hg.1	6.6017	5.90137	6.96997	7.07257	7.30112	6.83057	0.577074	0.198799
TMED5	TC0100014947.hg.1	10.2553	10.1022	10.3198	10.7517	11.0326	10.6232	0.576723	0.0236544
CASP8AP2	TC0600008780.hg.1	8.32755	7.72022	7.86667	8.99892	8.3239	8.32165	0.576678	0.120909
SLC25A24	TC0100015160.hg.1	7.39385	7.61331	8.1234	8.23699	8.33516	8.28717	0.576252	0.114168
SNAPC3	TC0900006708.hg.1	9.34121	9.33459	10.0819	10.235	10.0634	10.1877	0.576155	0.14072
LRMP	TC1200012606.hg.1	7.18271	6.91896	7.09224	7.6911	7.60652	7.6237	0.575802	0.0111449
PLGLB1	TC0200013332.hg.1	5.53696	5.74815	6.9406	6.48627	6.38214	7.08459	0.575765	0.325133
ZNF28	TC1900012025.hg.1	6.12676	5.1219	6.32163	6.39834	6.37673	6.52246	0.575747	0.26051
KLHL31	TC0600012084.hg.1	2.58553	2.51234	2.47977	3.03923	3.16902	3.09599	0.575536	0.000356511
GALK2	TC1500007180.hg.1	7.68676	7.96047	8.59655	8.64776	8.70295	8.61962	0.575519	0.165214
LRP6	TSUnmapped00000284.hg.1	4.03324	4.3411	4.77447	4.43479	5.20748	5.23194	0.575137	0.167431
TRAF5	TC0100011487.hg.1	6.28565	6.19286	6.65619	7.02013	6.78813	7.0515	0.575014	0.0349979
LRRC37A3	TC1700011465.hg.1	7.57022	7.57318	7.43519	7.8578	7.99963	8.44586	0.574905	0.0751113
TTC39B	TC0900012209.hg.1	6.52769	6.09223	6.11443	6.44709	7.01247	6.99894	0.574714	0.0744761
SCAPER	TC1500010097.hg.1	4.02798	5.19076	4.62287	5.37512	5.16789	5.02232	0.574574	0.223639
TM4SF5	TC1700006642.hg.1	4.14469	3.97035	3.47056	4.50663	4.69663	4.10575	0.574474	0.0990541
FOXB2	TC0900007640.hg.1	2.83759	3.47301	3.17493	3.77564	3.48265	3.94875	0.573838	0.0711891
SIKE1	TC0100015355.hg.1	9.89081	10.1887	9.89235	10.5003	10.8368	10.3559	0.573706	0.0352781
POLR3B	TC1200008729.hg.1	8.05007	7.16663	8.02823	8.43514	8.54222	7.98783	0.573423	0.180933
KIAA1033	TC1200008706.hg.1	5.92363	6.69095	5.80472	7.36026	6.3776	6.40158	0.573379	0.251483
ECHDC1	TC0600013115.hg.1	9.3631	8.90075	8.94313	9.53407	9.70403	9.68899	0.57337	0.0469043
MTRNR2L8	TC1100010087.hg.1	17.1671	17.2825	17.6479	17.7461	17.9259	18.1455	0.573293	0.0388841
TXNDC9	TC0200013607.hg.1	7.10444	7.25853	6.2825	7.27904	7.56256	7.52173	0.572615	0.19264
BNIP3L	TC0800007080.hg.1	14.0918	13.5883	13.8074	14.2407	14.6923	14.2722	0.572577	0.049852
ATL3	TC1100011128.hg.1	8.17969	7.54093	7.9884	8.16274	8.60944	8.65436	0.57251	0.0826321
NHSL1	TC0600014348.hg.1	4.60738	4.47527	4.54989	4.95714	5.21284	5.1797	0.572382	0.00874683
TMEM140	TC0700009243.hg.1	3.6808	3.49666	3.73401	4.74281	3.77521	4.11059	0.57238	0.174986
HHAT	TSUnmapped00000052.hg.1	3.67594	3.4964	4.03593	4.24162	4.24496	4.4387	0.572333	0.0531414
TRA2A	TC0700010472.hg.1	10.3302	9.47856	9.96707	10.6574	10.5188	10.3165	0.57231	0.133084
MYCBPAP	TC1700008259.hg.1	4.58842	4.95748	3.3554	4.76552	4.98947	4.86278	0.572158	0.358742
BIRC6	TC0200007194.hg.1	3.05265	4.43979	5.17069	3.67611	5.43138	5.27198	0.572109	0.531993
DHRSX	TC0Y00006898.hg.1	3.35511	4.19099	4.43899	4.0032	4.50182	5.19592	0.571947	0.296472
TMEM87B	TC0200008900.hg.1	9.16224	9.35469	9.60293	10.1001	9.834	9.9011	0.571775	0.0262185
LOC101927550	TC0700013412.hg.1	5.27006	5.60346	5.30244	5.92631	5.94949	6.01548	0.571773	0.0268559
TLX2	TC0200008089.hg.1	2.51232	2.95878	3.11609	3.6305	3.31451	3.35427	0.570693	0.0671112
VPS13C	TC1500009669.hg.1	7.1401	6.9677	6.59196	7.57915	7.18623	7.64628	0.570632	0.0585172
RPL6	TC1200011971.hg.1	14.482	14.3843	14.5317	14.7834	15.2705	15.0558	0.57057	0.0458368
GLS	TC0200010275.hg.1	10.1384	9.35725	10.1622	10.361	10.4786	10.5297	0.570505	0.159582
STRA13	TC1700012087.hg.1	4.93971	5.63651	6.18945	6.1686	6.60235	5.70598	0.570421	0.275446
CHRNB4	TC1500010898.hg.1	3.43376	4.38335	4.13908	4.95815	4.51032	4.19864	0.570307	0.19278
ARL13B	TC0300008046.hg.1	8.6513	7.91282	8.45071	8.72218	9.10693	8.89663	0.570302	0.105379
RASA2	TC0300009004.hg.1	5.79173	6.67581	6.35054	7.15509	6.60031	6.77315	0.570158	0.148516
TPD52	TC0800012433.hg.1	13.6126	13.6095	13.8577	14.3809	14.3361	14.0731	0.570087	0.011332
HSP90B1	TC1200008666.hg.1	9.76861	9.94664	9.7754	10.4586	10.4964	10.2443	0.569506	0.00553107
ZNF829	TC1900010543.hg.1	3.18806	2.93186	2.87499	3.5575	3.63173	3.51181	0.568709	0.0180401
ASF1A	TC0600009279.hg.1	10.7199	10.9466	10.8758	11.3669	11.5724	11.3091	0.568683	0.00597892
CXCL10	TC0400011053.hg.1	3.17004	3.02469	4.07757	5.36486	2.94011	3.67231	0.568326	0.527137
UCHL5	TC0100016786.hg.1	11.5255	11.6068	11.8238	12.228	12.3253	12.1078	0.56831	0.00859764
HIST2H2AB	TC0100015711.hg.1	13.4689	13.6221	13.7849	14.0813	14.2768	14.2223	0.568157	0.00978239
FBXL3	TC1300010048.hg.1	6.99487	6.66804	6.61057	7.6588	7.18638	7.1318	0.567835	0.0567717
C2orf15andLIPT1andMRPL30	TC0200016500.hg.1	4.96394	4.37404	4.28519	4.79534	5.8505	4.68066	0.567778	0.272653
HSDL1	TC1600011047.hg.1	9.35468	8.86755	9.39516	9.67436	9.91888	9.72733	0.567725	0.0615357
QRFP	TC0900011754.hg.1	7.34199	7.85972	7.61862	7.89668	8.05155	8.57495	0.567619	0.095387
NMS	TC0200008614.hg.1	3.444	3.7539	3.57373	3.43334	4.7338	4.307	0.567503	0.273924
ZC3H6	TC0200008911.hg.1	5.45369	5.96146	5.80821	6.38392	5.72977	6.81196	0.567432	0.206343
ARPC3	TC1200012843.hg.1	12.1789	11.5883	12.3587	12.8768	12.3851	12.5657	0.56728	0.120604
PYHIN1	TC0100010243.hg.1	4.21977	5.83063	4.53711	5.26768	5.64692	5.37454	0.567212	0.368839
SPATA7	TC1400007899.hg.1	5.32055	5.82122	6.126	6.61004	6.28375	6.07536	0.56713	0.124982
DIS3L	TC1500007612.hg.1	6.57443	7.01468	7.24175	7.33686	7.74112	7.45424	0.56712	0.0820899
TNRC6B	TC2200007419.hg.1	9.26452	8.80742	9.35786	9.45581	9.67882	9.99528	0.566704	0.0707352
RNF185	TC2200007087.hg.1	4.79479	4.81418	3.49793	4.70662	5.63479	4.46539	0.566634	0.373072
ZNF140	TC1200009528.hg.1	6.18335	6.41202	6.40257	6.85915	7.10518	6.73241	0.566262	0.0168242
RALGAPB	TC2000007320.hg.1	10.3786	10.6719	10.6852	11.216	11.0449	11.1728	0.565993	0.0152953
MPZ	TC0100016171.hg.1	4.31545	3.59466	4.74298	4.40102	5.05424	4.89514	0.565772	0.235079
SNW1	TC1400009793.hg.1	8.23694	8.73315	9.1146	8.9718	9.53949	9.26963	0.565413	0.146888
CCT8	TC2100007854.hg.1	11.0301	10.8258	11.4609	11.5699	11.7518	11.6907	0.56521	0.0846641
NEK2	TC0100017216.hg.1	9.31509	9.03779	9.0343	9.84007	9.50613	9.73563	0.564882	0.0141697
ZC3H15	TC0200010214.hg.1	9.23175	8.38936	8.99237	9.77148	9.37217	9.16444	0.56487	0.147751
SYNRG	TC1700010497.hg.1	11.6938	11.4294	11.5558	12.0065	12.1333	12.2305	0.563753	0.00529534
ASL	TC0700013380.hg.1	6.7358	6.51344	7.48886	7.05189	7.42287	7.95364	0.563431	0.227337
USP25	TC2100006618.hg.1	9.1678	9.41854	9.35217	9.72308	10.0047	9.90011	0.563141	0.00733743
DDX58	TC0900009825.hg.1	5.75714	4.45086	5.20862	5.91476	5.05902	6.13172	0.562965	0.324931
PRAC1	TC1700011002.hg.1	5.47869	5.82721	6.27254	6.41409	6.21998	6.63168	0.562436	0.117987
URI1	TC1900007695.hg.1	11.0292	10.7869	10.543	11.396	11.428	11.2213	0.562087	0.0399461
RNF150	TC0400012972.hg.1	6.83105	7.68299	7.58724	7.65586	8.40816	7.72319	0.561976	0.195488
FAM111B	TC1100007727.hg.1	6.24684	5.87244	5.73826	6.7155	5.88529	6.9425	0.561919	0.216689
LTV1	TC0600014189.hg.1	7.00575	6.73989	6.99328	7.23528	7.46436	7.72502	0.561917	0.0368448
FBXO34	TC1400007232.hg.1	7.64843	7.59157	8.1732	8.22952	8.77357	8.0957	0.561866	0.11417
DEPDC5	TC2200007109.hg.1	7.39837	6.9902	6.88239	7.51717	7.89602	7.54247	0.561567	0.0511553
PRM3	TC1600009397.hg.1	4.84206	5.14368	4.98688	5.33671	5.58388	5.73644	0.561469	0.0209313
METTL5	TC0200014870.hg.1	11.8221	11.4562	11.5305	12.2727	12.3111	11.9091	0.5614	0.0306449
OR7A10	TC1900009843.hg.1	3.35321	2.86732	3.50066	3.8699	4.2264	3.30742	0.560842	0.170756
FBXO5	TC0600013602.hg.1	8.37009	8.66595	8.81588	8.96669	8.99635	9.57102	0.560715	0.0862333
ZNF260	TC1900010528.hg.1	6.84815	6.33162	6.49314	6.59696	7.14584	7.61132	0.560402	0.188219
NCAPD3	TC1100012917.hg.1	10.5984	10.59	10.768	10.9889	11.4884	11.1602	0.56037	0.0472765
CCL16	TC1700010454.hg.1	3.66889	3.39037	3.91808	4.34448	4.23377	4.08016	0.560358	0.0473856
THBS3	TC0100015947.hg.1	14.3014	14.4265	14.5927	14.8854	14.67	15.4462	0.560347	0.12402
KIAA0753	TC1700009590.hg.1	5.72591	6.26713	6.28193	6.48061	6.94709	6.52817	0.560304	0.0787741
DPYSL4	TC1000009397.hg.1	3.01772	3.51411	3.06032	3.64764	4.08361	3.54141	0.56017	0.0714032
ORC5	TC0700012131.hg.1	10.5545	10.4102	10.4758	11.1057	10.999	11.0162	0.560167	0.000597954
FAR1	TC1100006906.hg.1	8.76007	8.10298	7.8395	8.77498	8.96211	8.64553	0.560021	0.168275
TMEM169	TC0200010726.hg.1	5.04765	4.45305	5.48879	5.95341	5.36734	5.34848	0.559913	0.205312
ADRBK2	TC2200006935.hg.1	13.6831	13.6127	13.6815	14.1382	14.5084	14.0099	0.55971	0.0612734
ZNF675	TC1900011928.hg.1	10.1584	10.1686	10.3884	10.7238	10.7828	10.8877	0.55965	0.00554411
ARHGAP42	TC1100008881.hg.1	5.04499	3.84308	4.90279	5.44301	4.76314	5.26269	0.559324	0.282793
NCK1	TC0300013878.hg.1	9.37332	8.88728	9.22798	9.96088	9.69922	9.50625	0.559261	0.0461215
NFYA	TC0600014123.hg.1	8.91444	8.62401	8.69156	9.14501	9.60839	9.15369	0.559024	0.0464854
COL6A2	TC2100007452.hg.1	3.21584	4.44381	3.92832	3.85012	4.87165	4.54321	0.559002	0.298411
ACAD11	TC0300014049.hg.1	4.74909	5.82717	5.3031	5.63163	5.80317	6.12135	0.558932	0.207395
ARPIN	TC1500010925.hg.1	5.40249	5.54474	5.38183	5.83134	6.48273	5.69138	0.558799	0.143785
OAS1	TC1200012708.hg.1	3.54112	3.83258	3.72254	4.80539	3.59411	4.37277	0.558675	0.252448
GPATCH8	TC1700010831.hg.1	11.6244	11.9088	11.6966	12.2165	12.3969	12.292	0.558523	0.00865809
NEU3	TC1100013072.hg.1	5.43225	5.38835	5.56709	5.86545	6.60525	5.59022	0.557739	0.204152
LRRC8B	TC0100008978.hg.1	6.97129	7.31697	7.14053	7.28789	7.95004	7.86305	0.557394	0.0979831
DLEU2	TC1300008938.hg.1	11.061	10.601	10.5285	11.1906	11.5204	11.1515	0.557317	0.0587668
ZSCAN32	TC1600009193.hg.1	6.22479	6.75119	5.74552	6.60405	7.05064	6.73875	0.557313	0.185736
KPNB1	TC1700008133.hg.1	10.9778	11.5151	11.1552	11.685	11.5733	12.0615	0.55727	0.0618331
DSN1	TC2000009016.hg.1	10.5882	11.0882	10.7718	11.521	11.2307	11.3674	0.556977	0.0415737
UFSP2	TC0400012638.hg.1	6.57039	6.04784	6.76992	6.62014	7.02197	7.41659	0.556851	0.152119
CYCS	TC0700010509.hg.1	12.2238	12.0124	12.1539	12.4416	13.0559	12.5629	0.556773	0.0853549
EZH2	TC0700012959.hg.1	10.9614	11.0875	10.9849	11.5687	11.6308	11.5037	0.556433	0.000483714
VPS26A	TC1000007888.hg.1	8.93288	8.55082	8.57447	8.95087	9.56976	9.20647	0.556309	0.0709959
ORAOV1	TC1100013201.hg.1	3.07394	3.74777	4.22045	4.22889	4.24948	4.2316	0.555937	0.236615
RIOK3	TC1800006889.hg.1	8.18764	6.89456	7.93838	8.32283	8.39968	7.96544	0.555794	0.293907
2011-03-01	TC0500013292.hg.1	3.90781	4.26456	4.54109	4.51454	4.56358	5.30255	0.555739	0.158637
PBX1	TC0100010430.hg.1	9.04376	8.92547	9.03076	9.42249	9.78684	9.45768	0.555677	0.0312146
WWC3	TC0X00006590.hg.1	3.98477	4.54572	4.24483	4.67245	4.80037	4.96836	0.555289	0.0554777
NUCKS1	TC0100017075.hg.1	12.2795	12.1383	12.1906	12.7063	12.8769	12.6905	0.555077	0.0024897
WWP1	TC0800008145.hg.1	7.96307	7.33883	7.01373	8.02772	8.39739	7.55558	0.555022	0.209262
HLA-DQA1	TC0600007657.hg.1	3.08529	2.76378	2.63912	3.17435	3.68087	3.29726	0.554758	0.0528661
KDM5B	TC0100016963.hg.1	10.8215	10.871	11.6864	11.5306	11.8494	11.6623	0.554463	0.178219
CD44	TC1100007273.hg.1	4.68783	4.84429	4.98141	5.26768	5.42582	5.48323	0.554397	0.00783862
TM4SF1	TC0300012773.hg.1	3.06699	3.2513	2.75097	3.62484	3.55794	3.54953	0.554347	0.0594831
PIGF	TC0200012489.hg.1	8.47771	7.9503	9.01495	9.24385	9.0529	8.80877	0.554188	0.205547
JAK2	TC0900006539.hg.1	3.67828	3.36777	3.75119	4.23492	3.73259	4.49182	0.554032	0.114422
XRCC5	TC0200010733.hg.1	6.35313	5.96593	7.56106	8.06094	7.34683	6.13389	0.553844	0.496582
ARPP21	TC0300007018.hg.1	3.83894	4.16425	3.92873	4.14025	3.7727	5.68046	0.553827	0.444066
RTN4	TC0200016673.hg.1	5.36333	6.46853	6.00681	6.48068	6.22397	6.79495	0.553641	0.222427
PNISR	TC0600012655.hg.1	7.64109	8.31907	8.14535	8.55069	8.72684	8.48888	0.553631	0.099766
RARS2	TC0600012512.hg.1	8.64609	8.00239	8.25361	8.75567	9.04884	8.75779	0.553404	0.0786993
GAR1	TC0400008388.hg.1	8.83421	9.3387	9.27224	9.57786	9.78809	9.73922	0.553338	0.0574418
ATMIN	TC1600008568.hg.1	10.5554	9.7477	10.2878	10.7425	10.7986	10.7085	0.552916	0.143752
APPL2	TC1200011773.hg.1	6.33558	5.91626	6.18344	6.39607	6.82006	6.87739	0.552747	0.0496305
CLASP2	TC0300010676.hg.1	9.11521	9.0293	8.58534	9.40778	9.46998	9.50976	0.552555	0.0737124
EVI2A	TC1700010314.hg.1	2.85377	2.541	2.82275	3.33075	3.28988	3.25439	0.552503	0.0262861
CADM1	TC1100012389.hg.1	6.73524	5.24458	5.94658	6.57737	6.78873	6.21734	0.552343	0.329667
LRIF1	TC0100015254.hg.1	6.87948	4.83196	6.20151	6.64053	6.22211	6.70655	0.552079	0.458589
GABRG2	TC0500009304.hg.1	5.7096	6.62464	6.13486	6.39591	6.95015	6.77869	0.551886	0.164688
CDCA8	TC0100007841.hg.1	10.2625	10.3707	10.6708	11.113	10.9156	10.931	0.551873	0.027732
PPIG	TC0200009911.hg.1	7.59416	7.67172	8.01636	8.1951	8.3088	8.43394	0.551867	0.0321226
PCM1	TC0800006880.hg.1	7.89445	8.33803	7.91014	8.97686	8.45062	8.36946	0.551443	0.0873199
TAOK1	TC1700007419.hg.1	9.30396	9.19521	8.49667	9.51373	9.64329	9.49094	0.550706	0.157296
MYH7	TC1400008718.hg.1	4.32752	4.44087	4.96643	5.25928	5.13445	4.99314	0.550687	0.0927503
BCL7C	TC1600009992.hg.1	5.99247	6.25641	6.62323	7.05401	6.89299	6.57672	0.550537	0.0795982
ICAM1	TC1900006977.hg.1	6.44254	7.16316	7.31405	7.84604	7.45124	7.2735	0.550339	0.171532
BLVRB	TC1900010708.hg.1	8.22843	7.84549	8.64329	9.00489	8.91561	8.44769	0.550328	0.134149
MFSD14C	TC0900012258.hg.1	9.58199	9.68756	9.92595	10.1853	10.5693	10.0903	0.549806	0.0428894
HSF4	TC1600008146.hg.1	7.36777	7.3979	7.82592	8.28143	7.88464	8.0747	0.549726	0.0457945
RMND1	TC0600013574.hg.1	8.07782	7.90851	8.20207	8.78804	8.52588	8.52325	0.549589	0.0108927
PTPN11	TC1200008916.hg.1	10.7812	10.9831	10.6857	11.5782	11.3119	11.2085	0.54953	0.0191882
FSTL1	TC0300012145.hg.1	3.25895	3.03913	3.4144	3.3921	4.18337	3.78522	0.549402	0.122577
PPP1R14A	TC1900010595.hg.1	5.22805	5.45464	4.38963	5.71573	5.72329	5.28146	0.549386	0.226741
NBPF15	TC0100015561.hg.1	6.72041	7.233	7.54871	7.83674	7.51251	7.80063	0.549253	0.137271
CSGALNACT2	TC1000007404.hg.1	7.37457	7.93164	7.8806	7.94238	8.06439	8.82707	0.54901	0.182691
CENPI	TC0X00007936.hg.1	6.22787	7.18696	6.96312	7.43658	7.47134	7.11681	0.548928	0.189826
FHIT	TC0300011324.hg.1	8.23575	7.94642	8.50818	8.9329	8.68923	8.71473	0.548834	0.0586546
SNAP47	TC0100018352.hg.1	4.12911	3.03111	4.39662	3.81102	4.59391	4.7984	0.548828	0.352056
USP12	TC1300008424.hg.1	8.37499	8.07497	7.8666	8.79768	8.45643	8.70859	0.548714	0.0440315
C22orf31	TC2200008383.hg.1	2.91283	3.193	2.77184	3.4978	3.72287	3.30302	0.548676	0.0340077
KBTBD8	TC0300007720.hg.1	5.34319	4.58389	5.81959	5.2112	5.74445	6.43426	0.547748	0.338909
LGALS8	TC0100012097.hg.1	7.98202	7.73439	7.69867	8.22556	8.53691	8.29501	0.547469	0.0135879
ZNF585A	TC1900011933.hg.1	8.62174	8.00157	8.47189	8.82148	9.04099	8.87419	0.547154	0.086232
ARPC5L	TC0900008742.hg.1	6.07422	6.96265	7.58382	7.36085	7.72757	7.17351	0.547081	0.339709
R3HDM1	TC0200009443.hg.1	5.96051	6.72548	5.28306	6.10713	7.03287	6.47016	0.547039	0.3416
SLC39A6	TC1800008474.hg.1	8.86188	9.1832	9.16731	9.67537	9.731	9.44686	0.546948	0.0168956
ZNF878	TC1900011874.hg.1	5.71257	5.23462	4.95424	5.92925	5.78548	5.82719	0.54683	0.127443
ZBTB44	TC1100012831.hg.1	9.11536	9.43382	9.62737	9.88669	10.0154	9.91384	0.546447	0.0589628
MLLT10	TC1000006975.hg.1	8.99286	8.57034	8.89376	9.30482	9.39467	9.39656	0.546366	0.0440181
C8orf44	TC0800012310.hg.1	6.68253	5.91051	5.78228	6.25588	7.19071	6.56778	0.54635	0.237008
TMEFF2	TC0200015266.hg.1	2.82124	3.23148	3.35561	3.24403	4.10733	3.69595	0.546326	0.151577
ZNF337	TC2000008755.hg.1	6.57825	6.50033	6.67182	7.03465	7.33524	7.01755	0.545681	0.019267
ZNF318	TC0600014294.hg.1	7.93302	8.52884	8.17427	9.02285	8.66655	8.58132	0.54486	0.0717923
INHBE	TC1200007881.hg.1	3.83079	4.18813	4.17761	4.60298	4.6464	4.58077	0.544544	0.040337
CD1E	TC0100010231.hg.1	6.56213	6.69549	6.81933	7.27934	7.49012	6.94064	0.544379	0.0584104
RAD54L	TC0100008151.hg.1	6.15032	6.17043	6.87033	7.15162	6.74572	6.92616	0.544139	0.133833
MDM4	TC0100018339.hg.1	11.8042	11.3585	11.4497	12.1633	11.9015	12.1798	0.544057	0.0358153
CRISPLD1	TC0800007995.hg.1	6.795	5.769	6.62571	7.40425	6.54514	6.87184	0.543843	0.253447
HMGN3	TC0600012363.hg.1	6.38022	7.28715	7.30937	7.66391	7.60178	7.34255	0.543834	0.211183
TYW1	TC0700007859.hg.1	7.67796	8.29244	7.58366	8.05733	8.51058	8.61746	0.543771	0.129409
SACM1L	TC0300007242.hg.1	9.89448	9.80931	9.71127	10.3042	10.5679	10.1737	0.543618	0.0271457
SYNCRIP	TC0600014322.hg.1	10.6854	10.8387	10.944	11.3437	11.5754	11.1798	0.543573	0.0221347
MKL2	TC1600006979.hg.1	8.36137	8.6247	7.7788	8.74049	8.74792	8.90557	0.543035	0.156718
IL7R	TC0500007138.hg.1	4.97977	4.48195	4.72863	5.47805	4.82789	5.51248	0.542691	0.121796
OR52D1	TC1100006696.hg.1	3.17131	3.56539	3.75692	3.98199	3.90519	4.23434	0.542635	0.0672322
HIST1H3A	TC0600007262.hg.1	10.161	11.0284	11.0659	11.0487	11.8383	10.996	0.54257	0.248852
ZNF227	TC1900008257.hg.1	6.86397	6.88547	6.63971	7.08184	7.78155	7.15266	0.5423	0.122887
RAB39B	TC0X00011237.hg.1	6.70528	7.05711	7.87178	7.89972	7.98958	7.37136	0.542166	0.260439
CLEC2D	TC1200006771.hg.1	3.16396	3.37623	2.87765	3.65254	3.74787	3.64388	0.542146	0.0576916
ADNP2	TC1800007835.hg.1	9.57818	9.75747	9.74633	10.0261	10.1988	10.4835	0.542141	0.0394194
PAFAH2	TC0100013371.hg.1	7.02308	6.60609	7.20636	7.67082	6.93989	7.85116	0.542116	0.188717
ZCCHC6	TC0900010624.hg.1	6.54986	6.49836	6.61242	6.66949	7.39835	7.21675	0.54132	0.129075
BORA	TC1300007483.hg.1	6.77248	6.47496	6.70744	7.46782	7.09365	7.01699	0.541199	0.0388646
EFHB	TC0300013951.hg.1	4.48585	3.88351	4.25309	4.879	4.97042	4.3964	0.541127	0.0963479
THADA	TC0200012405.hg.1	7.61685	7.51584	6.83718	7.58484	7.84444	8.16374	0.541048	0.15151
EML6	TC0200007618.hg.1	4.20347	3.15487	4.97902	4.62059	4.30331	5.03609	0.540876	0.421197
CDHR5	TC1100009686.hg.1	3.84274	3.10389	3.9071	3.64038	3.87827	4.95737	0.540766	0.33346
KIAA1841	TC0200016454.hg.1	5.8165	5.46591	5.4447	6.19919	5.96742	6.18272	0.540741	0.0262502
OXER1	TC0200012382.hg.1	4.73205	5.18455	4.8207	5.32156	5.47291	5.56467	0.540608	0.040576
DGCR6	TC22_KI270734v1_random00006434.hg.1	4.79477	5.89389	5.60913	6.03753	5.99698	5.88492	0.540547	0.240943
ACTR3	TC0200008996.hg.1	13.0559	12.7501	13.1768	13.3513	13.3878	13.8649	0.54039	0.0646775
CD46	TC0100011419.hg.1	9.01673	9.04768	8.9891	9.31527	9.62977	9.72955	0.540358	0.0471543
DIP2B	TC1200007615.hg.1	11.6644	11.8601	11.8059	12.3446	12.2887	12.3181	0.540297	0.00777594
C21orf59	TC2100008559.hg.1	9.1828	9.25339	9.45113	9.86036	9.81497	9.83237	0.540127	0.0191601
TMOD3	TC1500007240.hg.1	10.3208	10.0275	10.0656	10.7617	10.5043	10.7681	0.540077	0.013086
FGFR1OP2	TC1200007137.hg.1	8.73449	8.47464	8.54093	9.46833	8.94729	8.9535	0.539684	0.0711892
FIGNL1	TC0700011050.hg.1	7.33212	8.00327	7.68736	8.20709	8.35494	8.07955	0.539609	0.0928959
PEX16	TC1100010686.hg.1	7.22144	7.61991	7.54751	8.25666	7.86864	7.88218	0.539541	0.037897
ZNF780A	TSUnmapped00000311.hg.1	5.41443	4.27173	5.43349	5.65606	5.50421	5.57732	0.539311	0.294827
SMARCC1	TC0300010990.hg.1	12.3995	12.0038	12.4808	12.6968	12.8792	12.9239	0.538613	0.0490854
COX7A1	TC1900010513.hg.1	4.39427	4.36404	4.08729	4.89206	4.81227	4.75601	0.538243	0.0197428
MRPL44	TC0200010927.hg.1	10.0833	9.55941	10.462	10.3422	10.8672	10.5093	0.537968	0.167947
ZBTB6	TC0900011453.hg.1	3.93008	3.7667	3.84598	4.54829	4.17636	4.43201	0.537967	0.0253007
FAM185A	TC0700008650.hg.1	6.70843	6.07711	7.50175	7.67175	7.21363	7.01552	0.537866	0.326987
HKR1	TC1900010566.hg.1	3.83432	3.13484	3.6869	4.1704	3.88044	4.2185	0.537759	0.110809
PTPRK	TC0600013126.hg.1	8.3129	8.10943	7.98096	8.82589	8.28483	8.90486	0.537431	0.092084
MEF2A	TC1500008521.hg.1	10.3439	10.3437	10.3867	10.835	11.0168	10.8344	0.537307	0.0095119
EPB41L2	TC0600013165.hg.1	9.1508	10.1026	9.68068	10.1558	10.4407	9.94825	0.536919	0.181761
GTF2I	TC0700008010.hg.1	11.4418	11.2715	11.461	11.828	11.9164	12.0407	0.536917	0.00339503
TNRC6A	TC1600007262.hg.1	8.58669	8.3369	8.53276	8.7469	9.23067	9.08915	0.536787	0.0447752
FBXO11	TC0200012522.hg.1	8.61432	8.49961	8.71736	9.55228	8.75548	9.1338	0.536756	0.13677
GTF2H2	TC0500013320.hg.1	4.71418	4.2433	4.8496	4.79709	5.52451	5.09537	0.536628	0.129011
TIMM21	TC1800007667.hg.1	9.22744	9.24458	9.90937	9.9003	10.0724	10.0164	0.535886	0.133597
OXCT2P1	TC0100007910.hg.1	5.11007	5.34603	4.89265	5.2664	5.80254	5.88738	0.53586	0.0935853
ANKRD20A3	TC0900012126.hg.1	6.82077	7.28541	7.3818	7.56959	7.58866	7.93665	0.535635	0.0713287
ZKSCAN5	TC0700008498.hg.1	7.31938	6.82387	7.11511	7.70701	7.74406	7.41409	0.535599	0.0442988
RBM43	TC0200014609.hg.1	5.07376	4.66101	5.1172	5.24483	5.71094	5.50296	0.535589	0.0543387
GPHA2	TC1100011195.hg.1	3.20386	2.98934	3.59476	3.92882	3.62151	3.84437	0.535577	0.0748171
YWHAZ	TC0800012446.hg.1	15.0351	14.7588	15.0433	15.5232	15.4758	15.4449	0.53554	0.0238563
RBM25	TC1400007625.hg.1	6.4814	6.05872	6.41375	6.88291	7.04024	6.63709	0.535457	0.038866
KLK11	TC1900011234.hg.1	3.31869	3.47826	3.27655	3.73489	3.86591	4.07895	0.535418	0.0159321
ZC3H13	TC1300008837.hg.1	10.1475	10.1626	10.1317	10.5317	10.9791	10.5368	0.535273	0.0683956
ARFGEF2	TC2000007620.hg.1	8.65736	8.16685	8.17816	9.12869	8.40425	9.07416	0.53491	0.140947
PGAP1	TC0200015332.hg.1	7.16968	7.43419	7.38252	7.50744	7.84277	8.24063	0.534816	0.114064
KMT2C	TC0700013102.hg.1	8.18024	7.71286	7.79483	8.43199	8.20724	8.65268	0.534657	0.0511327
FEM1C	TC0500011752.hg.1	3.29524	3.96702	4.02362	3.92125	4.57158	4.397	0.534649	0.155974
FBN3	TC1900009517.hg.1	2.71629	2.82633	2.98745	2.94173	3.55897	3.63181	0.534143	0.12249
NBN	TC0800011061.hg.1	6.12903	6.39804	6.70958	7.1823	6.90035	6.7562	0.53407	0.0681447
ITIH6	TC0X00009786.hg.1	2.81294	3.41911	2.64247	3.55985	3.50008	3.41623	0.533885	0.147915
TAF9	TC0500010999.hg.1	11.2605	10.9746	11.2882	11.653	11.8996	11.5717	0.533687	0.0191788
PPP6R1	TC1900008900.hg.1	8.91291	8.75223	9.07664	9.58467	9.72035	9.03744	0.533562	0.109056
GOLGA2P5	TC1200011675.hg.1	4.40552	4.43842	4.07951	4.80228	4.73498	4.98675	0.53352	0.0232252
KRT38	TC1700010670.hg.1	2.86907	2.9357	3.31823	3.64731	3.1089	3.96703	0.533415	0.155819
MOB3C	TC0100018438.hg.1	4.54073	5.66526	5.85675	6.34397	5.74639	5.57212	0.533244	0.337001
USP18	TC2200006540.hg.1	6.55183	7.22332	7.24999	7.72069	7.4452	7.45662	0.532453	0.132062
FSTL5	TC0400012288.hg.1	2.59894	3.50379	3.0367	3.6656	3.41497	3.65571	0.532283	0.170148
PPFIBP2	TC1100006760.hg.1	3.13053	3.24877	3.51511	3.97533	3.87243	3.64267	0.532011	0.0248788
BICD1	TC1200007262.hg.1	7.90407	8.19201	7.68157	8.56233	8.53734	8.27308	0.531699	0.0478146
ARHGAP19	TC1000012580.hg.1	12.1603	12.1186	12.1612	12.6167	12.949	12.469	0.531537	0.0631321
ANKRD10	TC1300009810.hg.1	9.6135	9.76211	9.81376	10.3036	10.2919	10.1883	0.531447	0.00339111
ANK2	TC0400008450.hg.1	5.55161	5.56184	5.63165	6.12367	6.04083	6.1738	0.531068	0.000738688
IPO8	TC1200010264.hg.1	8.05365	7.72253	8.37512	8.73629	8.29283	8.71498	0.530932	0.0934814
HSPA9	TC0500012182.hg.1	13.3626	13.7221	13.6497	14.059	14.3232	13.9435	0.530437	0.0278932
PYROXD2	TC1000011577.hg.1	3.76993	3.37191	3.60361	4.09475	4.65187	3.58987	0.530347	0.219456
MMEL1	TC0100012544.hg.1	2.53338	3.07005	3.20808	3.53617	3.28466	3.58046	0.529926	0.10748
PRPF38A	TC0100008315.hg.1	10.8833	10.5092	11.0175	11.2736	11.427	11.299	0.5299	0.0624135
ABL2	TC0100016548.hg.1	7.84113	8.13681	8.0642	8.58663	8.64825	8.39434	0.529031	0.0113085
PGC	TC0600011800.hg.1	3.50335	4.63831	4.83505	4.89074	4.67153	5.00128	0.528947	0.329736
RSPO2	TC0800011452.hg.1	3.34123	3.26782	3.34066	3.95248	3.26394	4.31961	0.528771	0.229033
CCDC146	TC0700013394.hg.1	2.73813	3.62986	4.32106	3.80268	4.20318	4.26803	0.528278	0.369734
EPB41	TC0100007574.hg.1	12.0426	12.0787	11.7614	12.4728	12.588	12.4058	0.527963	0.0181667
RPL11	TC0100007326.hg.1	15.4704	15.5701	15.8945	16.2226	16.3408	15.9552	0.527873	0.0376454
[truncated: 19,449 more rows]

## Sheet: Sheet2
GeneSymbol	Probe Set ID	Neg1	Neg2	Neg3	High1	High2	High3	LogFC	p-value
CCL1	TC1700010393.hg.1	5.70266	5.28094	5.28283	7.36848	7.67341	7.28938	2.02161	0.000448816
PNPLA8	TC0700013605.hg.1	4.81597	5.01019	4.68985	6.75913	6.61197	6.75643	1.8705	0.000376268
MGAT4A	TC0200013595.hg.1	10.0694	10.5376	10.4871	12.0361	12.2582	12.4119	1.87068	0.000806386
CKAP2L	TC0200013912.hg.1	6.03657	6.29651	6.58575	8.35629	8.64218	7.93034	2.00333	0.00199789
SRP72	TC0400007593.hg.1	9.3562	9.13041	9.07365	10.681	10.813	10.6148	1.51619	0.000290249
KRIT1	TC0700011770.hg.1	7.11342	6.82248	7.35103	9.15569	8.9283	9.10518	1.96741	0.00188454
RTTN	TC1800008978.hg.1	5.86572	5.90855	5.69983	7.21535	7.32545	7.28688	1.45119	0.000280687
DLGAP5	TC1400009248.hg.1	6.48848	7.42751	7.48724	9.83083	9.47509	9.43241	2.44503	0.00929902
ANKRD36C	TC0200016710.hg.1	10.9865	11.113	10.9952	12.3135	12.1354	12.2359	1.19671	7.74152e-05
TOP2B	TC0300010540.hg.1	7.81328	7.73327	7.67706	9.07333	9.11249	9.30884	1.42368	0.00036594
TOP2A	TC1700010618.hg.1	8.58757	8.51365	9.03514	10.6711	10.6454	10.4324	1.87086	0.00244737
TCF12	TC1500007333.hg.1	11.9904	12.0227	12.1475	13.1915	13.1888	13.3469	1.18881	7.81322e-05
ARHGEF6	TC0X00010933.hg.1	9.7774	9.86475	9.57118	10.9543	11.0961	11.2	1.3457	0.000346918
MBNL1	TC0300009202.hg.1	11.0315	11.2202	11.0718	12.5922	12.627	12.6355	1.51043	0.000880171
PLK4	TC0400008664.hg.1	6.03686	6.31012	6.4356	7.85542	7.64371	7.85548	1.52401	0.00104046
NDC80	TC1800006484.hg.1	8.41507	8.66554	8.82536	10.1191	9.91221	10.2697	1.46499	0.000827171
HELLS	TC1000012477.hg.1	9.67856	9.47548	9.65835	10.7762	10.9175	10.7853	1.2222	0.000202181
IQGAP1	TC1500008312.hg.1	9.06795	8.8176	8.85496	10.1821	10.48	10.1812	1.36757	0.000552394
RLIM	TC0X00010097.hg.1	6.67891	7.08388	7.21216	9.01054	8.80006	8.34457	1.72674	0.00280546
ZNF559-ZNF177	TC1900006932.hg.1	7.90412	7.89822	8.01594	9.15871	8.97185	9.06814	1.12681	0.000140955
FRMD4A	TC1000009851.hg.1	4.64127	4.35144	3.87452	6.41315	6.35568	6.17942	2.02701	0.00736683
CEP128	TC1400009829.hg.1	7.00361	7.2066	7.29767	8.56254	8.54973	8.40145	1.33528	0.000611715
NRBP2	TC0800012168.hg.1	4.95521	5.09212	5.1268	6.0748	6.22849	6.11435	1.08117	0.000112651
ALCAM	TC0300008242.hg.1	4.46225	4.1676	4.66099	6.33014	6.26254	6.29825	1.8667	0.00516735
SP3	TC0200014971.hg.1	11.4046	11.4568	11.2975	12.4794	12.6996	12.5309	1.18367	0.000253144
ARID5B	TC1000007761.hg.1	11.6945	11.381	11.6146	12.7842	13.239	13.0589	1.46399	0.00132522
REST	TC0400007609.hg.1	7.81833	8.04064	8.05048	9.39861	9.22749	9.08434	1.267	0.000508134
CHRDL1	TC0X00010512.hg.1	4.91041	4.8008	5.15321	6.45745	6.82239	7.25972	1.89172	0.0065289
BUB1	TC0200013878.hg.1	10.314	10.0478	10.1884	11.3555	11.6995	11.4274	1.3107	0.000831145
CDK6	TC0700011785.hg.1	8.8692	8.51024	8.64681	10.1439	10.1681	10.0181	1.43461	0.00162809
STAU2	TC0800012427.hg.1	10.3217	10.5443	10.5538	11.6831	11.7279	11.5575	1.18286	0.000442072
MTMR6	TC1300008386.hg.1	8.71505	8.44931	8.95436	9.92199	10.1948	10.3338	1.44394	0.00182135
AFTPH	TC0200007805.hg.1	9.0313	8.88788	9.07493	10.227	9.98873	10.1636	1.12841	0.000324201
STRN	TC0200012252.hg.1	8.92196	9.03771	9.12959	10.3135	10.1944	10.0476	1.15542	0.000399549
KIF4A	TC0X00007537.hg.1	6.72071	6.37386	7.01423	7.94539	8.58426	8.41625	1.61237	0.0037582
CLINT1	TC0500012611.hg.1	9.34562	9.35842	9.52043	10.6368	10.6832	10.4257	1.17375	0.000477609
LUC7L3	TC1700012283.hg.1	9.42454	10.0986	9.75533	11.1027	11.6645	11.2762	1.58834	0.00371119
GPCPD1	TC2000008295.hg.1	3.19463	3.62546	3.99957	5.01882	5.26409	5.88941	1.78422	0.00708492
CCSER2	TC1000008276.hg.1	7.88793	8.35631	8.07006	9.79612	9.26427	9.62061	1.45557	0.00233106
EPRS	TC0100017365.hg.1	6.59354	6.97259	6.62417	8.40791	8.27559	9.12273	1.87198	0.00909914
LATS1	TC0600013528.hg.1	10.3129	10.4358	10.5433	11.5005	11.5355	11.7713	1.17178	0.000549368
CD96	TC0300008320.hg.1	8.87305	9.08817	9.58168	10.6809	11.0636	10.8676	1.68973	0.00549779
PRKDC	TC0800010360.hg.1	10.3536	10.1094	10.3053	11.5795	12.0031	11.5865	1.46698	0.0025011
RB1	TC1300007137.hg.1	11.5199	11.5029	11.7193	12.7836	13.0554	12.7135	1.2701	0.00104663
CHD6	TC2000009134.hg.1	7.06338	7.09023	6.86489	7.97817	8.10647	8.18511	1.08375	0.000361297
RAD50	TC0500008641.hg.1	6.60218	6.65566	7.27138	8.98552	8.31091	8.27393	1.68038	0.00607951
ARHGAP11B	TC1500006785.hg.1	9.71221	9.21758	9.65628	11.1851	11.0211	10.9322	1.51743	0.00377828
SPAG9	TC1700011128.hg.1	7.80212	7.63684	7.75567	8.63208	8.64472	8.77927	0.953813	0.000152762
NCAPG	TC0400006994.hg.1	8.43184	8.46795	8.65037	9.77931	9.80823	9.84236	1.29324	0.00153682
CKAP2	TC1300007248.hg.1	6.13168	6.32168	6.78002	7.76299	8.5048	7.8672	1.63387	0.00616846
PPP4R3B	TC0200012648.hg.1	7.5507	7.89513	7.88578	8.94788	8.96768	9.35939	1.31444	0.00189096
AGPS	TC0200010100.hg.1	8.93671	9.21851	8.9314	10.0573	10.3185	10.1898	1.15963	0.00084381
SPTBN1	TC0200007609.hg.1	12.669	12.8285	12.6479	13.6451	13.7368	13.7733	1.00324	0.000294381
DEPDC1	TC0100014543.hg.1	6.81397	6.47776	6.1814	7.65451	8.07623	8.3406	1.53273	0.00491473
ADTRP	TC0600010825.hg.1	4.37271	4.8164	3.90708	6.47246	5.69204	6.04222	1.70351	0.00839046
RSBN1L	TC0700008147.hg.1	9.18736	9.09211	8.86184	10.3459	10.0495	10.2293	1.16113	0.000907813
CD28	TC0200010523.hg.1	8.42002	8.2768	8.21706	10.2264	9.75656	10.6623	1.91045	0.0145303
CCDC14	TC0300012216.hg.1	9.16017	9.05093	9.43954	10.6205	10.33	10.3998	1.23325	0.00143175
AHR	TC0700006795.hg.1	6.15978	5.42816	5.97338	7.80015	7.17761	7.29198	1.56947	0.0060391
EXOC1	TC0400007572.hg.1	6.8372	7.15655	6.95784	8.24954	8.33905	7.97157	1.20286	0.00129125
KDM7A	TC0700012798.hg.1	6.16851	6.32018	6.4828	7.27895	7.55622	7.54213	1.13527	0.000890728
AIM1	TC0600008981.hg.1	8.61226	8.36105	8.62042	9.72953	9.49732	9.6508	1.09464	0.000698437
GTF3C3	TC0200015329.hg.1	6.69419	6.52672	6.97296	7.95179	8.26997	7.82885	1.28558	0.00225218
LNPEP	TC0500011523.hg.1	3.56964	3.86876	3.06739	4.84735	5.49378	4.89825	1.57786	0.00751698
LAX1	TC0100011270.hg.1	8.41893	8.22827	8.35483	9.58761	9.54261	9.95042	1.35953	0.00346135
MYOM2	TC0800006496.hg.1	3.46639	3.88246	3.63394	5.05032	4.8442	4.97173	1.29449	0.00264661
FAM160B1	TC1000008984.hg.1	8.80671	8.90287	8.84625	9.89627	10.0671	10.156	1.18783	0.0016488
KIF11	TC1000008471.hg.1	7.59626	6.54417	7.2021	8.49046	9.29773	8.76119	1.73562	0.0126871
HLTF	TC0300012764.hg.1	6.34632	6.27851	6.3768	7.95259	7.53466	7.84293	1.44285	0.00537978
SHPRH	TC0600013464.hg.1	4.53591	5.5144	5.40627	7.36319	6.48828	6.82889	1.74126	0.0132487
GPR19	TC1200009972.hg.1	8.01847	7.85139	8.173	9.21658	9.15934	9.03593	1.123	0.00140863
NCOA3	TC2000007572.hg.1	8.75077	8.86196	8.96932	9.88899	9.96143	9.86154	1.04331	0.000853721
KIF14	TC0100016891.hg.1	5.77054	4.92234	5.34335	7.43873	6.6694	6.72905	1.60032	0.0100304
GNPTAB	TC1200011711.hg.1	6.9779	7.47457	7.56117	8.80702	8.93633	8.40975	1.37982	0.00487768
NKTR	TC0300007165.hg.1	8.8458	8.26336	8.82932	10.2677	10.2882	10.3457	1.65436	0.0121777
ANLN	TC0700007198.hg.1	8.3032	7.43616	7.92115	9.26958	9.70142	9.49886	1.60311	0.0112756
NUCB2	TC1100012976.hg.1	13.5207	13.3094	13.6564	14.4458	14.8707	14.6556	1.16188	0.00213889
MTIF2	TC0200012642.hg.1	7.1928	7.05935	7.45053	8.56579	8.62195	8.17431	1.21979	0.0029489
IFI16	TC0100010244.hg.1	8.90887	8.61029	8.92267	9.81353	9.98427	10.0057	1.12056	0.00176752
CDC40	TC0600009112.hg.1	9.85574	10.1453	10.0168	11.152	10.9998	11.0048	1.04625	0.00118158
KIAA0586	TC1400007310.hg.1	6.66585	6.98912	7.32884	8.49891	8.4061	8.62377	1.51499	0.00973744
PRKACB	TC0100008874.hg.1	7.83187	7.34658	7.473	8.71806	9.12403	8.61731	1.26932	0.00399012
ERAP2	TC0500008156.hg.1	8.10829	8.02135	8.10392	9.31702	9.21032	9.56899	1.28759	0.00438169
CLSPN	TC0100013700.hg.1	6.01391	5.42145	6.47757	7.64147	7.95333	7.55378	1.74522	0.0183429
TGS1	TC0800007681.hg.1	8.36146	8.38809	7.95843	9.37524	9.2631	9.7095	1.21329	0.00329226
DDX21	TC1000007876.hg.1	8.54557	9.26775	9.00998	10.4701	10.3159	10.6	1.52091	0.0105567
DDX26B	TC0X00008514.hg.1	6.00755	5.33834	5.40305	7.07411	7.28046	7.07803	1.56122	0.0119436
KIAA1524	TC0300011943.hg.1	7.67499	7.86936	7.87197	8.69044	8.91767	9.03535	1.07571	0.00174079
CUL3	TC0200015887.hg.1	7.95702	7.96066	8.21967	9.19742	8.92821	9.01087	0.999712	0.00109676
SREK1	TC0500007617.hg.1	5.75161	6.31349	6.16143	7.14234	7.54281	7.37653	1.27839	0.00485351
PIBF1	TC1300007484.hg.1	4.40013	4.15709	4.61925	6.12658	5.72276	5.43701	1.36996	0.00704236
DEK	TC0600010962.hg.1	11.8896	11.9092	12.0922	12.7992	13.016	12.8269	0.917047	0.000623121
HEATR1	TC0100017860.hg.1	8.72546	8.09992	8.48277	9.95628	9.65293	9.82776	1.37627	0.00734162
DCLRE1A	TC1000011885.hg.1	5.39238	5.70824	6.00496	7.23144	7.17756	7.26776	1.52373	0.0118293
ANKRD20A1	TC0900010284.hg.1	7.05597	6.57082	7.58167	8.71576	8.95018	8.42558	1.62769	0.0157501
CEP63	TC0300008888.hg.1	8.4261	8.33037	8.63072	9.45091	9.46483	9.60761	1.04539	0.00156482
SSFA2	TC0200010164.hg.1	4.1581	4.53405	4.61022	5.40777	5.64966	5.78007	1.17838	0.00325092
VNN2	TC0600013205.hg.1	3.18377	3.08507	3.19191	3.921	3.92009	3.82197	0.734102	0.000103835
LIMA1	TC1200010655.hg.1	8.26339	8.18097	8.57828	9.4687	9.70219	9.27472	1.14099	0.00274167
SP4	TC0700006864.hg.1	6.86576	6.61903	6.72564	7.68282	7.66477	7.96884	1.03533	0.00155656
GIMAP4	TC0700009677.hg.1	4.64928	4.27897	3.90825	5.88309	5.83983	5.30053	1.39565	0.00835908
ESCO2	TC0800007119.hg.1	7.56464	6.69148	7.22181	8.46299	8.93051	8.65043	1.522	0.0125974
LRPPRC	TC0200012418.hg.1	8.81361	9.02274	8.62521	10.2359	10.1861	9.73489	1.23176	0.00451439
USP1	TC0100008554.hg.1	9.23587	8.7541	9.3681	10.2209	10.7429	10.3227	1.3095	0.00636498
KLHL32	TC0600008883.hg.1	3.64395	3.57428	3.91524	4.57981	4.80885	4.87401	1.04307	0.0017519
SLCO4C1	TC0500011596.hg.1	8.50473	8.41979	8.33482	9.33477	9.14947	9.28868	0.837856	0.00038246
GNL2	TC0100013748.hg.1	6.8663	6.11011	6.74413	7.85206	7.97915	8.28032	1.46366	0.0110778
SLC38A2	TC1200010518.hg.1	11.9983	11.6523	12.1615	12.8732	13.3028	13.2285	1.19749	0.00412583
LCOR	TC1000008556.hg.1	7.58745	7.82801	7.498	8.50727	8.75316	8.91387	1.08695	0.00238894
MCM10	TC1000006819.hg.1	4.92579	4.72419	4.47619	5.87263	6.04551	5.88802	1.22666	0.00477447
DOCK11	TC0X00008228.hg.1	6.71988	7.05061	6.41005	8.12003	7.81086	8.18048	1.31028	0.00671855
USPL1	TC1300006767.hg.1	4.6673	5.35885	5.01327	6.62004	6.47533	6.47881	1.51159	0.0132333
DBF4	TC0700008263.hg.1	7.10687	7.03943	7.03224	8.86483	8.59666	8.23779	1.50692	0.0130768
FBXO43	TC0800011243.hg.1	5.60603	5.77581	4.67398	6.97099	7.19381	7.29303	1.80067	0.0271959
MCM8	TC2000006628.hg.1	11.1873	10.4476	10.4347	12.1549	12.3941	12.3182	1.59921	0.0173355
KIAA1324L	TC0700011692.hg.1	6.41817	6.33305	6.61681	7.30345	7.42971	7.51343	0.959518	0.00116501
UBR2	TC0600008050.hg.1	8.51525	8.62869	8.34716	9.44169	9.39802	9.56767	0.972097	0.00127831
LMAN1	TC1800008824.hg.1	11.0127	10.7227	11.1594	12.2441	12.0924	11.888	1.1099	0.00296003
NUP50	TC2200007607.hg.1	11.5879	11.6331	11.4757	12.5502	12.6586	12.3866	0.96625	0.00128401
SCRN3	TC0200010009.hg.1	7.89727	7.49531	7.76777	8.98142	8.81154	8.80727	1.14663	0.00367789
PAPOLA	TC1400008119.hg.1	11.8123	11.7562	11.8051	12.9148	13.3332	13.0615	1.31194	0.00763287
RMI1	TC0900007740.hg.1	7.36328	7.13963	6.90312	8.34987	8.44057	8.01914	1.13452	0.0035655
SMC3	TC1000008896.hg.1	7.39221	6.92738	8.03486	8.88234	9.29372	9.2313	1.6843	0.0224577
UBR1	TC1500009204.hg.1	10.2761	10.7047	10.4439	11.385	11.9795	11.9093	1.28305	0.00708732
BMS1	TC1000007396.hg.1	5.8712	6.60996	6.39469	7.94122	7.4568	7.56704	1.36307	0.00959054
HOMER1	TC0500011240.hg.1	7.46707	7.68607	7.56407	8.44818	8.59411	8.34245	0.889175	0.000848574
SEL1L	TC1400009842.hg.1	8.7591	9.29928	9.37654	10.5088	10.6369	10.3045	1.33842	0.00913895
INTS6	TC1300008983.hg.1	7.8308	7.57918	7.70385	8.73471	8.7007	8.62602	0.98253	0.00171098
KIF15	TSUnmapped00000255.hg.1	4.98467	4.63353	5.24327	6.56216	6.03197	6.04732	1.26	0.00709601
ZNF92	TC0700007807.hg.1	8.21713	7.76054	8.2616	9.09503	9.48481	9.20695	1.1825	0.00525597
ZNF277	TC0700008818.hg.1	6.42641	6.54635	6.51754	7.26286	7.30881	7.24842	0.776599	0.000340341
KLHL36	TC1600008656.hg.1	5.01631	5.39222	5.58975	6.8549	6.74654	6.23139	1.27818	0.00782856
SAMD9	TC0700011796.hg.1	3.99685	3.86771	4.36673	5.46012	5.21329	5.01227	1.15146	0.00461716
CPSF2	TC1400008007.hg.1	10.2056	10.3645	10.3938	11.3146	11.3442	11.0825	0.92579	0.00128666
KIAA1429	TC0800011139.hg.1	6.28463	6.43903	7.04729	7.95765	7.8511	8.22786	1.42188	0.0131313
ANKRD36	TC0200008534.hg.1	10.3168	9.69583	9.86803	11.1599	11.4435	11.0631	1.26192	0.00759202
NCOR1	TC1700009881.hg.1	10.0161	9.98442	10.0217	11.003	11.2811	11.1313	1.1311	0.00433808
DOCK9	TC1300009583.hg.1	5.25804	5.70933	5.47691	6.53081	6.9322	6.43836	1.15237	0.00480814
SECISBP2L	TC1500009358.hg.1	6.62599	7.04075	7.56652	8.92658	8.39545	8.29012	1.45963	0.0149501
SON	TC2100006974.hg.1	8.1412	8.43876	8.55619	9.4502	9.59164	9.27502	1.06024	0.00310584
ZDHHC3	TSUnmapped00000491.hg.1	3.80535	3.54283	4.11259	5.03055	5.1652	5.21009	1.31502	0.00957715
PSME4	TC0200012608.hg.1	7.13038	7.46404	7.13251	8.43366	8.30263	8.40868	1.13935	0.00471744
HMMR	TC0500009320.hg.1	5.63925	5.76303	5.81321	7.01884	6.6364	6.97265	1.13747	0.00470776
MED23	TC0600013177.hg.1	7.8129	7.74497	7.44976	8.61037	8.96156	8.59337	1.05256	0.00307033
XAF1	TC1700006709.hg.1	6.77684	6.96973	7.41407	8.00174	8.69761	8.36308	1.3006	0.00926904
GNAQ	TC0900010485.hg.1	10.4855	10.3722	10.5958	11.6519	11.3032	11.4851	0.995567	0.00222508
PARP14	TC0300008561.hg.1	6.74859	6.83846	6.4092	7.97461	7.94933	7.98664	1.30478	0.00950033
ABCE1	TC0400008902.hg.1	9.3205	8.43195	8.92812	9.87819	10.8425	10.4443	1.49481	0.0172773
TPP2	TC1300007884.hg.1	8.52421	8.84797	8.7616	10.2483	9.91739	9.65037	1.22741	0.00739771
ATP8B1	TC1800008781.hg.1	5.14699	4.9702	5.29909	5.9714	6.34238	6.43287	1.11012	0.00446753
CDCA2	TC0800007065.hg.1	6.76688	6.46931	5.95401	7.66118	7.92323	7.94719	1.44713	0.0159872
EXOC6	TC1000008475.hg.1	3.85157	4.13869	4.68365	5.74466	5.33803	5.76803	1.39227	0.0137219
SLC4A7	TC0300010561.hg.1	10.2205	10.1958	10.4225	11.2197	11.1767	11.0611	0.87291	0.00107117
NCAPG2	TC0700013290.hg.1	9.93262	10.2186	10.3047	11.0283	11.2656	11.2223	1.02007	0.00290421
LMBRD2	TC0500010493.hg.1	5.65875	5.26747	5.62342	6.99099	6.58833	7.59075	1.54014	0.0209306
CEP120	TC0500011881.hg.1	7.66498	7.75579	7.65792	8.84612	8.72861	8.55864	1.01823	0.00291034
HMGN5	TC0X00010172.hg.1	5.31571	5.62718	5.37866	6.66764	7.55182	6.76232	1.55341	0.0218632
ELF1	TC1300008702.hg.1	11.0964	11.1526	11.4446	12.3911	12.3183	12.2355	1.08374	0.00417163
SENP6	TC0600008562.hg.1	8.46985	8.61429	9.07426	9.93356	10.1958	9.6581	1.20967	0.00770574
ZBTB41	TC0100016833.hg.1	4.23853	3.77329	4.35283	5.08265	5.61359	5.26559	1.19906	0.00738408
MTRNR2L6	TC0700009462.hg.1	4.14539	4.31625	4.32271	5.25759	5.13764	5.51272	1.0412	0.00350988
YME1L1	TC1000010115.hg.1	10.0875	10.1105	10.2784	11.0487	11.4848	11.2601	1.10575	0.00491511
PRPF40A	TC0200014631.hg.1	8.93176	8.62928	8.64552	9.57251	9.81917	9.65222	0.94578	0.00208413
TMX4	TC2000008345.hg.1	8.11869	7.91028	7.9386	8.79936	8.89804	8.73368	0.821172	0.000816996
VPS35	TC1600010171.hg.1	7.82702	7.2949	7.40588	8.3802	8.94565	8.7317	1.17658	0.00703782
MIA3	TC0100011692.hg.1	7.26666	7.61301	6.9725	8.6129	8.17476	8.71272	1.21606	0.00830175
CCDC93	TC0200014004.hg.1	8.87461	8.50052	8.53296	9.96844	9.69583	9.48452	1.08023	0.00455146
PDCD4	TC1000008904.hg.1	8.75427	8.69345	8.99134	9.68325	9.62803	9.87138	0.91453	0.00171406
TRIM38	TC0600007257.hg.1	7.19755	6.71305	7.42837	8.63189	8.18974	8.36892	1.28386	0.010809
KIF23	TC1500007699.hg.1	9.03775	8.4293	8.38739	10.1354	9.81043	9.86419	1.31852	0.0122939
TTC30B	TC0200015071.hg.1	5.42462	4.79635	5.13748	7.04387	6.28187	6.22298	1.39676	0.0157627
NIN	TC1400009141.hg.1	6.15172	6.51673	6.41179	7.5063	7.17911	7.32164	0.975602	0.00264465
R3HCC1L	TC1000008595.hg.1	4.41833	4.03828	4.264	5.31306	5.02145	5.34896	0.987621	0.00289276
ANKRD36B	TC0200013567.hg.1	9.61494	9.32199	9.90094	10.9266	10.8364	10.9844	1.30319	0.0119347
ANKRD36	TC0200008536.hg.1	8.35227	7.92872	8.32426	9.48302	9.10711	9.19657	1.06048	0.00440046
MAP3K7	TC0600012566.hg.1	8.78446	8.75324	8.98827	9.69637	9.80527	9.78886	0.921505	0.00196798
ANKRD20A4	TC0900012135.hg.1	6.38103	6.20323	6.45206	7.58287	7.48094	7.1572	1.06156	0.0045106
RASA3	TC1300009933.hg.1	8.77111	9.38048	9.27699	10.3059	10.6298	10.0988	1.202	0.00863019
ZKSCAN1	TC0700008517.hg.1	8.77088	9.01484	9.2131	9.94562	9.90846	10.3246	1.05994	0.00456762
BBS2	TC1600010409.hg.1	5.83514	5.537	5.85111	7.09665	6.78794	6.59605	1.0858	0.00519798
YTHDF3	TC0800007809.hg.1	12.3361	12.205	12.4679	13.0574	13.2938	13.1959	0.84606	0.00121917
GCC2	TC0200013805.hg.1	3.76229	3.95354	3.7407	5.50542	4.8197	5.11997	1.32952	0.0140291
EIF2AK2	TC0200012257.hg.1	8.26842	8.19465	8.78131	9.6004	9.34398	9.85394	1.18465	0.00837824
LSAMP	TC0300012073.hg.1	8.30104	8.38736	8.13517	9.0869	9.11435	9.22862	0.868768	0.00148289
ZBTB24	TC0600014332.hg.1	7.94198	7.47745	7.68455	8.71599	8.8568	8.9055	1.12477	0.00656491
SEC63	TC0600012764.hg.1	8.55666	8.58237	9.12529	10.1638	9.88267	9.82278	1.20164	0.0095419
IWS1	TC0200016727.hg.1	8.37282	8.48531	8.6849	9.4891	9.24939	9.58117	0.925543	0.00239613
AGGF1	TC0500007841.hg.1	7.78054	8.26489	8.07635	9.29331	9.06776	8.9144	1.05123	0.0049966
POTEI	TC0200014269.hg.1	6.63197	5.79912	6.14582	7.4162	7.27876	7.82358	1.31388	0.0144589
INO80D	TC0200015506.hg.1	8.96519	8.94352	8.55977	9.75943	9.7087	10.0859	1.02852	0.00451736
MTMR2	TC1100012033.hg.1	9.49622	9.42449	9.58866	10.3403	10.1982	10.1693	0.7328	0.000529108
CEP85L	TC0600013001.hg.1	5.99805	5.21808	5.57341	6.51426	7.55832	7.01458	1.43254	0.0218858
RAD18	TC0300010186.hg.1	8.19979	8.09055	8.25618	8.89284	8.81331	8.96176	0.707131	0.000435507
AP3M1	TC1000011050.hg.1	11.9043	11.6061	11.6203	12.5714	12.7519	12.5568	0.916473	0.00256649
ZNF326	TC0100008996.hg.1	6.78538	7.87549	7.80584	8.74299	9.05622	9.34325	1.55859	0.0301375
CEP55	TC1000008482.hg.1	4.84813	5.46992	6.34732	7.20049	7.27645	7.54501	1.78552	0.0477943
SOGA3	TC0600013119.hg.1	4.848	5.32957	5.26489	6.58277	6.06765	6.12479	1.11092	0.00760228
LRRCC1	TC0800008120.hg.1	5.22122	4.56371	5.05412	5.8297	6.82889	6.36688	1.39547	0.0206854
MKI67	TC1000012235.hg.1	9.65699	9.00469	9.30195	10.5401	10.4809	10.7086	1.25534	0.0135914
RALGAPA1	TC1400008945.hg.1	6.95595	7.22078	7.80873	8.32647	8.57627	9.04002	1.3191	0.0168334
BAZ1B	TC0700011493.hg.1	10.3286	10.3156	10.1303	11.0592	10.9618	11.2317	0.826017	0.00148628
TWISTNB	TC0700010396.hg.1	5.49952	5.0167	5.56083	6.6825	6.52975	6.62838	1.25453	0.013771
USP44	TC1200011588.hg.1	9.04119	9.26771	9.17098	9.88773	10.2102	10.0342	0.884075	0.00228845
WBP4	TC1300006965.hg.1	7.49984	7.8971	7.83875	8.81053	8.56483	8.81639	0.985352	0.00431917
PIK3R1	TC0500007641.hg.1	4.79836	6.22666	5.9042	7.00904	7.65078	7.37211	1.7009	0.0428512
PBRM1	TC0300011175.hg.1	6.31509	6.57757	6.3758	7.57526	7.6116	7.18747	1.03529	0.00568084
FAM72D	TC0100009723.hg.1	12.7622	12.4063	12.5335	13.4538	13.3401	13.6738	0.92192	0.00301365
KPNA2	TC1700008719.hg.1	12.5365	12.7345	12.5216	13.4917	13.589	13.2874	0.858477	0.0020133
CD2AP	TC0600008183.hg.1	7.9023	8.04994	8.20245	9.29401	8.83545	9.05126	1.00868	0.00508169
PARP4	TC1300008359.hg.1	7.70988	7.43845	7.98015	8.85463	8.94949	8.97456	1.21673	0.0126087
TRIP12	TC0200015963.hg.1	8.36398	8.46702	8.32163	9.20448	9.53064	9.2966	0.959697	0.00395144
ZFX	TC0X00006809.hg.1	6.83369	6.60022	6.49682	7.87131	8.13364	7.48124	1.18515	0.0113515
MCM9	TC0600013004.hg.1	7.82597	8.1783	8.2828	9.31482	9.24663	9.18745	1.15394	0.0100632
ZNF197	TSUnmapped00000358.hg.1	3.79324	4.11543	4.15213	5.02201	5.09398	4.88745	0.980877	0.00449188
CEP44	TC0400009352.hg.1	6.0351	6.40257	6.47347	7.48034	7.10718	7.33537	1.00392	0.0051673
ZGRF1	TC0400011620.hg.1	5.32786	4.29581	5.32155	6.06287	6.75643	6.59644	1.49017	0.0288086
SPDL1	TC0500009377.hg.1	7.5824	7.4042	7.88052	8.63942	8.82626	8.65974	1.0861	0.00777936
SLF2	TC1000008661.hg.1	4.60893	4.91387	5.41718	5.89125	6.56646	6.27064	1.26279	0.0155927
LRRC37A	TC1700008095.hg.1	10.5494	10.4811	11.006	11.5541	11.9234	11.8116	1.0842	0.00802775
NUSAP1	TC1500006999.hg.1	10.826	10.9965	11.0257	12.1805	12.3216	11.7883	1.14739	0.0105289
BTBD7	TC1400010022.hg.1	6.13174	6.69384	6.55219	7.72603	7.33987	7.58874	1.09229	0.00842284
KIF15	TC0300007223.hg.1	6.18978	6.11788	6.57953	7.38132	7.51521	7.3543	1.12121	0.00958736
GORAB	TC0100010565.hg.1	5.43731	5.38572	5.61681	6.50984	6.60776	6.21402	0.963929	0.00457959
DHX36	TC0300012857.hg.1	7.94443	8.02795	7.85583	8.8025	8.64691	8.59791	0.739704	0.000901068
KAT6A	TC0800010258.hg.1	8.06574	7.72473	8.16033	9.02352	9.13891	8.93774	1.04979	0.00718728
CEP78	TC0900007663.hg.1	8.0442	7.75217	7.93961	8.72368	8.86246	8.65853	0.836234	0.00205231
ARHGAP11B	TC1500010709.hg.1	6.42201	5.93733	5.98755	7.19999	6.98936	7.31523	1.05257	0.00747859
TNFSF8	TC0900011302.hg.1	5.23525	4.58215	5.45019	6.65938	5.916	7.0552	1.45433	0.0289769
KPNA3	TC1300008926.hg.1	5.80358	4.87435	5.51095	7.07645	6.60021	6.49675	1.32817	0.0207675
TNKS2	TC1000008447.hg.1	9.34604	8.96711	9.2391	10.4719	10.3729	9.93046	1.07433	0.00843943
KIF16B	TC2000008473.hg.1	4.74101	5.51199	5.34234	6.45618	6.68064	6.41869	1.32006	0.020578
USP9X	TC0X00007026.hg.1	7.89043	7.46763	7.57775	8.59045	8.74338	8.73655	1.04486	0.00739979
MTRNR2L3	TC2000009588.hg.1	5.33733	5.11366	5.7336	6.19283	7.02734	6.7398	1.25846	0.0170958
HSPH1	TC1300008533.hg.1	8.61961	8.19329	8.92906	9.87332	9.90005	9.99036	1.34059	0.021948
DSG2	TC1800007014.hg.1	6.07807	6.51525	6.88166	7.28519	8.12176	8.01615	1.31604	0.0204925
PREPL	TC0200012433.hg.1	7.79853	7.50085	7.51221	8.62835	8.61617	8.53068	0.987866	0.00565068
TRMT5	TC1400009355.hg.1	6.61695	6.82257	6.68285	8.01192	8.14028	7.55391	1.19458	0.0139689
USP32	TC1700011313.hg.1	6.50282	6.78901	7.02961	7.85836	7.59214	7.95912	1.02939	0.00707477
CEP70	TC0300012572.hg.1	8.47188	7.98836	8.48464	9.5323	9.30881	9.47777	1.12467	0.0111569
CSE1L	TC2000007627.hg.1	9.70417	9.92722	9.83796	10.5705	10.8092	10.5397	0.816702	0.00207757
PHIP	TC0600012358.hg.1	6.34621	6.40244	6.07807	7.11246	7.35388	7.74142	1.12701	0.0114755
HSPA13	TC2100007597.hg.1	6.67734	6.36656	6.93826	7.497	7.92616	7.72452	1.05517	0.00847971
KIF15	TSUnmapped00000627.hg.1	8.27518	7.2357	8.03567	9.41157	9.42727	8.97629	1.42286	0.0291253
ERCC5	TC1300009994.hg.1	9.64198	9.34181	9.56922	10.7259	10.2473	10.6055	1.00855	0.00682457
RAD51AP1	TC1200006561.hg.1	7.34684	7.77945	7.37572	8.50168	8.3796	8.65234	1.01053	0.00691634
EXT1	TC0800011595.hg.1	3.62228	3.91434	3.93316	4.89518	4.84638	4.845	1.03892	0.00794068
SECISBP2	TC0900007865.hg.1	9.22339	9.26553	9.43937	9.93495	10.0977	10.123	0.742453	0.00117141
EIF3A	TC1000011988.hg.1	9.68236	10.3332	9.76404	10.7078	11.3173	11.3096	1.18507	0.0145956
ARRB1	TC1100011643.hg.1	4.08292	4.06004	3.79286	5.01091	4.84916	4.67097	0.865077	0.00310153
ZBED6	TC0100011272.hg.1	10.6361	10.2956	10.7188	11.5792	11.6116	11.6968	1.07905	0.0100005
ARHGAP5	TC1400006851.hg.1	4.96393	5.48928	5.90504	6.49152	7.21509	6.57445	1.3076	0.0223692
XRN1	TC0300012665.hg.1	6.22797	5.51848	6.48569	7.46261	7.68029	7.10904	1.33994	0.0246339
FAM111A	TC1100007728.hg.1	11.1362	10.6719	10.5459	12.0051	12.076	11.9437	1.22358	0.0173446
FAM63B	TC1500007379.hg.1	5.65961	5.74623	6.33101	7.24227	6.87553	7.16484	1.18193	0.015307
CKAP5	TC1100010713.hg.1	7.83018	8.26425	8.02985	9.14642	8.97772	8.95568	0.98518	0.00664964
MTRF1	TC1300008720.hg.1	8.8256	9.05503	8.96677	9.80575	9.79769	9.72171	0.825914	0.00257402
USP34	TC0200007722.hg.1	3.25376	3.61114	2.65142	4.30712	4.23669	4.89101	1.30617	0.0231176
MYB	TC0600009534.hg.1	15.1499	15.1762	15.1224	15.8183	15.8682	15.7496	0.662563	0.000619649
SPEN	TC0100007006.hg.1	9.25568	9.30337	9.02422	10.1323	9.93771	9.92337	0.80337	0.00227796
DIAPH3	TC1300009088.hg.1	10.2073	9.87947	10.2928	11.0844	11.04	11.2268	0.990571	0.00723215
MMS22L	TC0600012631.hg.1	10.3174	10.3336	10.3978	11.0767	11.2889	11.3098	0.87557	0.00380206
LIN9	TC0100017523.hg.1	6.29274	6.81351	7.10637	8.12325	8.13395	7.58449	1.20969	0.0178065
MDM1	TC1200011181.hg.1	5.22516	5.38621	5.41177	6.02385	6.35088	6.18705	0.846212	0.00320284
CCNT2	TC0200009428.hg.1	9.40269	9.32856	9.16283	10.0846	10.6534	10.4483	1.09743	0.0120267
MDM2	TC1200008116.hg.1	8.70896	8.2843	8.54881	9.52096	9.61873	9.49353	1.03038	0.00917878
JMJD1C	TC1000012561.hg.1	5.38709	5.60856	4.9177	6.54811	6.63418	6.11024	1.12639	0.0137773
RPS6KB1	TC1700012287.hg.1	9.15716	8.96848	9.1165	9.69908	9.95733	9.86325	0.759171	0.00175429
PPP2R5E	TC1400009388.hg.1	8.61003	8.48986	9.0299	9.91194	9.64595	9.78327	1.07045	0.0112208
CDK5RAP2	TC0900011378.hg.1	4.39762	4.6795	5.19622	6.22626	5.83506	5.82682	1.20493	0.0185262
RHOBTB1	TC1000010737.hg.1	4.94482	5.15508	5.20015	5.75834	6.10316	6.08655	0.882664	0.00433612
ZNF468	TC1900012026.hg.1	7.06004	6.80332	6.66069	7.61987	7.86678	7.76388	0.908823	0.00507158
SIRPG	TC2000009971.hg.1	10.2515	10.2952	10.2624	11.3996	11.1532	11.6305	1.12472	0.0140487
LRRFIP1	TC0200016603.hg.1	7.08991	7.46063	7.61442	8.70329	8.78373	8.10644	1.14283	0.0150718
ZNF121	TC1900009588.hg.1	9.11921	8.77366	9.40818	10.3544	10.3499	10.2958	1.23298	0.0205054
2011-09-01	TC0400007913.hg.1	8.80036	8.2922	8.76511	9.61079	9.51528	9.8419	1.03677	0.0098573
PECAM1	TC1700011442.hg.1	9.42408	9.40929	9.59674	10.4125	10.849	10.3702	1.06718	0.0112953
BLOC1S5	TC0600014238.hg.1	7.65127	7.46563	8.15328	8.6613	9.68086	8.93047	1.33415	0.027815
MED13L	TC1200012043.hg.1	11.3661	11.456	11.3238	11.9333	12.0456	11.9665	0.599833	0.000349474
POU2F1	TC0100010499.hg.1	11.3453	11.3523	10.9989	12.2083	12.3701	11.9241	0.935353	0.0061019
IQGAP2	TC0500007826.hg.1	5.9508	6.18531	6.26935	6.83345	6.98687	7.22308	0.87931	0.00441696
TDP2	TC0600011067.hg.1	8.3768	8.16614	8.39629	8.98049	9.10974	9.1323	0.761101	0.0019228
CDC25C	TC0500012166.hg.1	8.71268	9.06257	9.26582	9.94078	10.2236	9.9906	1.03796	0.010254
SMC2	TC0900008286.hg.1	5.60622	5.41188	6.03242	6.4657	6.98664	6.80576	1.06919	0.0118017
DDX18	TC0200009041.hg.1	8.48376	8.89678	8.73218	9.67145	9.81445	9.39482	0.922668	0.00583904
SSR1	TC0600014233.hg.1	11.6548	11.611	11.8218	12.3701	12.502	12.3794	0.72132	0.0013902
BCLAF1	TC0600013272.hg.1	6.79405	5.89597	6.00154	7.5455	7.55887	7.75891	1.39058	0.0330391
DYNC1H1	TC1400008341.hg.1	10.5876	11.0433	10.8709	11.9274	11.6356	11.7659	0.942333	0.0065395
CCP110	TC1600007112.hg.1	5.173	5.078	5.68432	6.97761	6.06603	6.63748	1.24861	0.022546
ZNF808	TC1900011793.hg.1	8.24349	7.56227	8.06391	8.80972	9.30053	9.09736	1.11265	0.014202
CENPE	TC0400011477.hg.1	6.52386	6.08312	5.96397	6.9261	7.78718	7.54062	1.22765	0.0212709
RBMS1	TC0200014735.hg.1	5.02901	5.40043	4.9966	6.25145	5.8348	6.15514	0.938448	0.00655673
FCGR2A	TC0100018308.hg.1	3.37785	3.34908	3.40769	4.24017	4.12254	4.06683	0.764974	0.00211489
AHI1	TC0600013258.hg.1	4.58645	3.79674	4.37303	5.73976	5.24085	5.32354	1.18265	0.0186924
EML4	TC0200007353.hg.1	8.80668	8.64346	9.21086	9.8208	9.73954	10.1702	1.0232	0.0100929
SSB	TC0200009920.hg.1	11.1529	12.1029	11.5685	13.0219	13.0425	12.99	1.41004	0.0356267
VPS36	TC1300009013.hg.1	8.77609	8.83488	9.05512	9.80012	9.61013	9.59111	0.778424	0.00241362
TMEM154	TC0400012150.hg.1	7.72063	7.38931	7.89888	8.90904	8.36646	8.97328	1.07999	0.0130276
FASTKD2	TC0200010582.hg.1	4.8705	4.99282	5.02851	6.09759	6.14156	5.71585	1.02106	0.0102278
ERCC6L2	TC0900008091.hg.1	4.14547	4.19556	4.18214	5.02951	5.50688	5.63236	1.2152	0.021491
VEZT	TC1200008508.hg.1	6.10024	6.15336	6.72044	7.59692	7.50082	7.15125	1.09165	0.013942
IPO11	TC0500013175.hg.1	8.98694	8.41934	9.09517	10.1692	9.96225	9.73535	1.12178	0.0160447
WRN	TC0800007209.hg.1	5.63931	4.84834	5.96478	6.78052	7.16852	6.68278	1.39313	0.0359166
PPIP5K2	TC0500008232.hg.1	7.15278	7.33845	6.77352	7.99506	8.31172	8.0091	1.01704	0.010518
DOCK2	TC0500012781.hg.1	6.14149	5.30443	6.04619	7.40238	7.2522	6.60968	1.25739	0.0251955
PSMD12	TC1700011523.hg.1	7.80392	7.77801	8.18295	8.70786	8.8825	8.96926	0.931582	0.0069704
PHF14	TC0700006715.hg.1	8.37173	8.59181	8.5973	9.2308	9.37301	9.15979	0.734252	0.00183855
ZNF146	TC1900007917.hg.1	7.58694	8.03621	7.38672	8.96273	8.66686	8.68981	1.10318	0.0151201
SLC39A10	TC0200010328.hg.1	6.36807	6.50847	6.97737	7.82378	7.81805	7.84826	1.21206	0.0220983
KIAA2026	TC0900012202.hg.1	4.02467	4.74892	4.16128	5.54201	5.52518	5.6592	1.26384	0.0260989
RASGRP1	TC1500009056.hg.1	9.95804	10.0919	10.2199	10.8117	11.2988	11.051	0.963877	0.00855079
ATF2	TC0200015009.hg.1	11.1308	10.8632	10.9269	11.786	11.859	11.7382	0.820783	0.00377947
TBL1XR1	TC0300013215.hg.1	6.86034	6.41346	6.50675	7.54291	7.30361	7.71546	0.927145	0.00720001
CRYM	TC1600009677.hg.1	4.20387	4.51177	4.39234	5.11537	5.57313	5.22202	0.934178	0.0075063
KLHL31	TC0600012084.hg.1	2.58553	2.51234	2.47977	3.03923	3.16902	3.09599	0.575536	0.000356511
SMARCAD1	TC0400008170.hg.1	6.34168	6.83702	6.12801	7.29883	7.70364	7.63718	1.11098	0.016611
UBXN4	TC0200009447.hg.1	10.8097	10.8827	10.6411	11.625	11.5515	11.5208	0.78791	0.00309537
ITCH	TC2000007184.hg.1	8.30595	8.32338	8.15264	9.20873	8.90729	9.03171	0.788584	0.00313361
WWP1	TC0800008146.hg.1	3.81347	4.30067	4.294	4.94686	5.1666	5.71105	1.13879	0.0184577
NAIP	TC0500011049.hg.1	6.89674	6.56151	7.08674	8.16325	7.53868	7.98398	1.04697	0.0131618
DNAJC3	TC1300007755.hg.1	7.23516	7.65906	7.69106	8.43876	8.6876	8.29174	0.944274	0.0083235
ATAD2B	TC0200011965.hg.1	5.30901	4.56234	4.99685	5.97043	6.16448	6.25275	1.17315	0.0212608
USO1	TC0400007879.hg.1	9.26645	9.18028	9.59896	10.4187	10.2855	10.2953	0.984592	0.0101855
KCNA3	TC0100015246.hg.1	8.87514	8.85792	9.12902	9.69075	9.73211	9.84926	0.803348	0.00361917
RHOBTB3	TC0500008125.hg.1	3.93485	4.13669	4.21391	4.70438	5.02298	4.98059	0.807501	0.00380031
MELK	TC0900007129.hg.1	10.155	9.78317	10.2912	11.1741	11.1245	10.954	1.0077	0.0115202
HELZ	TC1700011519.hg.1	8.21553	7.9134	8.13555	8.77946	9.29666	9.06729	0.959644	0.0093095
DST	TC0600012123.hg.1	3.69866	4.43239	4.23895	5.88275	5.01878	5.14562	1.22572	0.0259331
HIST1H3I	TC0600011233.hg.1	15.7435	15.7474	15.9195	16.4106	16.6001	16.4247	0.675057	0.00132383
PHF6	TC0X00008470.hg.1	9.94985	9.32696	9.79871	10.7978	10.9159	10.6502	1.09612	0.0169121
2007-03-01	TC0200009789.hg.1	9.38904	8.31237	9.0338	10.2156	10.3286	10.4272	1.41204	0.0424723
SUPT20H	TC1300008633.hg.1	12.1917	12.2736	12.1161	12.7988	12.9794	12.7988	0.665197	0.00126214
RUFY3	TC0400007789.hg.1	5.82974	6.61158	6.61317	7.25733	7.66955	7.73643	1.20294	0.0249923
CEBPZ	TC0200012260.hg.1	5.16123	5.47952	5.93989	6.73516	7.24499	6.29521	1.23157	0.0272481
EMSY	TC1100008505.hg.1	10.5716	10.4048	10.3714	11.0527	11.2576	11.0875	0.68332	0.00152012
CCDC144A	TC1700012200.hg.1	3.79752	3.40641	4.49012	5.84912	4.68134	5.31027	1.38223	0.0406958
NOP58	TC0200010480.hg.1	9.40118	9.73783	9.82403	10.6526	10.337	10.6227	0.883115	0.00670949
SGOL1	TC0300010476.hg.1	8.74955	8.66915	8.7339	9.53844	10.2686	10.0498	1.23475	0.0280428
CAB39	TC0200011034.hg.1	9.06137	9.02574	8.83476	9.88914	9.93082	9.58939	0.829159	0.00488264
DUSP11	TC0200013079.hg.1	11.061	10.8219	10.9048	11.6168	11.9074	11.6221	0.786243	0.00368102
AZI2	TC0300010581.hg.1	5.84427	5.49913	5.6861	6.84648	6.35014	6.59768	0.921599	0.00842849
SLMAP	TC0300013842.hg.1	4.44826	4.88892	4.99472	5.59755	6.04419	5.64388	0.984572	0.0115975
AIMP1	TC0400008335.hg.1	7.04037	6.93121	7.53602	8.37528	8.40065	7.86567	1.04467	0.015013
HACE1	TC0600012702.hg.1	6.05401	5.4026	5.76358	7.08182	6.84017	6.46071	1.05417	0.0156917
POTEF	TC0200014246.hg.1	7.70865	6.93324	7.52656	8.79711	8.46338	8.31209	1.13471	0.0211324
CDCA3	TC1200009759.hg.1	7.44046	7.33187	7.26928	8.36873	8.1774	8.01831	0.840943	0.00550153
SMARCA1	TC0X00010785.hg.1	5.22359	5.68963	4.75261	6.11581	6.66196	6.50969	1.20721	0.0268662
CWC27	TC0500007591.hg.1	7.73887	7.28739	7.92547	8.76829	8.87412	8.71368	1.13479	0.0215097
DCUN1D1	TC0300013330.hg.1	6.12001	6.6631	6.86851	7.60361	7.89139	7.59082	1.14473	0.0222398
NCOA1	TC0200006969.hg.1	6.90489	6.85424	6.22969	7.89526	7.40555	7.9757	1.0959	0.0188017
AP4E1	TC1500007217.hg.1	6.15847	6.49886	6.65564	7.31782	7.22544	7.5508	0.927028	0.0091684
RFC1	TC0400010459.hg.1	6.32766	6.39462	7.23748	7.68941	8.6043	7.63194	1.32196	0.0374039
LRRTM4	TC0200016694.hg.1	4.42888	4.27667	4.54623	5.19761	5.27609	5.69673	0.972885	0.01169
SCN8A	TC1200007641.hg.1	4.79524	5.21743	4.8644	5.83669	6.07648	5.64223	0.89278	0.00793496
CAPN7	TC0300006702.hg.1	5.99791	6.10051	6.59079	7.29177	6.9613	7.70412	1.08933	0.0190178
TPR	TC0100016709.hg.1	5.43956	5.89576	5.85745	6.73838	6.75451	6.47602	0.925378	0.00950195
SLC7A11	TC0400011920.hg.1	7.04332	7.58526	7.24374	8.2351	8.38332	8.37272	1.0396	0.015928
BRD7	TC1600010262.hg.1	10.3608	10.3351	10.5162	11.3654	11.4098	11.0456	0.869547	0.00709876
GPR21	TC0900008684.hg.1	7.06319	7.11601	7.92078	8.42412	8.78751	8.65552	1.25572	0.0326301
TTC37	TC0500011490.hg.1	4.54953	4.91269	4.81456	5.5734	5.48282	5.70451	0.827979	0.00557211
RANBP2	TC0200008807.hg.1	5.79615	6.42926	6.88077	7.74057	7.86691	7.4642	1.32184	0.0389165
DAAM1	TC1400007328.hg.1	4.71916	3.91505	5.10125	5.88482	5.82009	6.20524	1.39156	0.0458134
ZBTB21	TC2100008233.hg.1	8.90015	8.70034	8.77581	9.40454	9.54283	9.71529	0.762121	0.00362276
ZRANB3	TC0200014390.hg.1	3.83244	4.05313	4.07822	4.68034	4.59437	4.83801	0.71631	0.00255351
IBTK	TC0600012413.hg.1	8.18331	8.23828	7.92909	9.16161	8.77128	8.89951	0.827241	0.00571362
CDC7	TC0100009020.hg.1	7.19611	7.30195	7.9788	8.45803	8.58106	8.89609	1.15277	0.0246305
MNS1	TC1500009522.hg.1	6.60161	6.52004	5.74358	7.13909	7.48592	8.41947	1.39308	0.0468908
TRIM33	TC0100015346.hg.1	8.42531	8.2346	8.21386	9.17771	8.90743	9.28343	0.8316	0.00597394
RAB8B	TC1500007518.hg.1	9.60307	9.53556	9.68043	10.5032	10.8791	10.4195	0.994228	0.0138171
CDC5L	TC0600008132.hg.1	6.96307	6.71721	7.28015	7.85554	8.13227	7.9012	0.976196	0.0127955
FAM102B	TC0100009324.hg.1	8.5592	8.2824	8.41269	9.21626	9.24496	8.98929	0.732077	0.00299646
SLC30A9	TC0400007361.hg.1	9.40847	9.65482	9.82682	10.2655	10.6633	10.8078	0.94884	0.0113082
EZH2	TC0700012959.hg.1	10.9614	11.0875	10.9849	11.5687	11.6308	11.5037	0.556433	0.000483714
VPS13B	TC0800008352.hg.1	9.64013	9.60812	9.7296	10.6802	10.3373	10.6424	0.894003	0.00873815
GABRB3	TC1500008772.hg.1	7.05557	6.82976	7.30255	8.09361	7.96907	7.7829	0.885904	0.00841245
SLC12A2	TC0500008568.hg.1	7.25717	7.32392	7.95759	8.85712	8.54695	8.41279	1.09273	0.0208774
WAC	TC1000007127.hg.1	13.3367	13.4704	13.4006	14.0285	14.2811	14.1031	0.73503	0.00320292
KIF18A	TC1100010418.hg.1	5.40257	5.04562	5.49482	7.28569	6.09494	6.62388	1.35384	0.0443273
THUMPD1	TC1600009666.hg.1	6.34477	7.26287	7.09858	8.15728	8.36322	7.81897	1.21108	0.0308015
NUF2	TC0100010397.hg.1	6.87684	6.99971	7.71063	8.50528	8.38843	8.51323	1.27325	0.0365159
ZNF257	TC1900007543.hg.1	7.59111	7.73113	7.60785	8.22409	8.20073	8.37888	0.624533	0.00117841
TCERG1	TC0500009010.hg.1	3.60706	3.86491	3.26209	4.3683	4.55241	4.74962	0.978753	0.0135899
SMC1A	TC0X00009760.hg.1	10.0533	9.55092	9.97416	10.8912	10.8971	10.6619	0.957259	0.0126007
RRM1	TC1100006644.hg.1	12.3824	12.4509	12.7552	13.4866	13.4355	13.3466	0.893427	0.00939721
THRAP3	TC0100007798.hg.1	9.89468	9.79033	9.99601	10.4219	10.5974	10.6268	0.655038	0.00172321
DDHD1	TC1400009198.hg.1	5.70929	5.46902	5.91114	6.69027	6.61389	6.33911	0.851272	0.00751956
ORC5	TC0700012131.hg.1	10.5545	10.4102	10.4758	11.1057	10.999	11.0162	0.560167	0.000597954
MAP4K5	TC1400009131.hg.1	10.9368	10.9021	10.9148	11.6209	11.5837	11.7485	0.73312	0.00344527
SPICE1	TC0300012023.hg.1	6.64466	6.78067	6.1614	7.69348	7.50415	7.63709	1.08266	0.021511
APOOL	TC0X00007777.hg.1	8.58324	8.64419	8.36618	9.14607	9.2232	9.3846	0.720086	0.00312667
UFL1	TC0600008873.hg.1	6.34063	5.88066	6.54696	7.06008	8.02187	7.29985	1.20452	0.0319554
CHEK1	TC1100013111.hg.1	11.196	10.975	11.1899	11.8911	12.3474	11.9201	0.93262	0.0117105
NUP160	TC1100010762.hg.1	8.99169	9.42206	9.27727	10.0874	10.4924	9.93883	0.942529	0.0123595
PPWD1	TC0500007604.hg.1	8.472	8.54152	8.81358	9.42597	9.49042	9.53814	0.875808	0.0088617
GPSM2	TC0100009333.hg.1	4.95525	5.97815	5.74605	7.00413	6.84927	6.85721	1.34372	0.0459856
IQCF3	TC0300013837.hg.1	5.69952	5.07474	5.12788	6.00257	6.76145	6.38952	1.0838	0.0220141
ARL6IP1	TC1600011494.hg.1	9.53793	9.74906	10.1998	10.5594	11.1625	10.8386	1.02458	0.0177332
KIAA1586	TC0600008346.hg.1	8.67383	8.67348	8.39744	9.32361	9.67072	9.26968	0.839749	0.00731394
EIF3E	TC0800012451.hg.1	13.0412	12.6828	12.8792	13.6813	13.7881	13.6383	0.83486	0.00711843
C14orf177	TC1400008155.hg.1	4.87419	5.21439	5.37447	6.22624	6.07007	6.03012	0.954459	0.0132281
TTK	TC0600008630.hg.1	9.18769	8.51065	8.90161	9.60379	10.6229	10.0135	1.21339	0.0335035
CUL2	TC1000010310.hg.1	6.54969	6.88879	6.96746	7.83659	7.54918	7.55124	0.843685	0.00766917
NCOA7	TC0600009365.hg.1	4.85524	5.15187	4.82073	5.90154	5.53142	5.92616	0.843763	0.00767807
ATP11C	TC0X00010966.hg.1	7.43833	7.30234	7.22091	8.05931	8.2302	8.5907	0.972878	0.0146689
HS2ST1	TC0100018242.hg.1	7.98203	8.65986	9.10306	9.44257	10.2108	9.8887	1.26569	0.0390104
BRCA2	TC1300006802.hg.1	6.8447	6.85769	6.71434	7.5012	7.99052	7.84006	0.971684	0.0147109
H2BFM	TC0X00008026.hg.1	5.27575	5.31954	5.82162	6.17833	6.7935	6.4263	0.993738	0.0165251
FASTKD1	TC0200014857.hg.1	7.89099	7.62415	7.40807	8.34281	8.55822	8.64741	0.875074	0.00951344
ATE1	TC1000012056.hg.1	7.86867	7.56948	7.81427	8.67961	8.42801	8.39297	0.749388	0.00436235
WAPL	TC1000011299.hg.1	7.34925	7.23143	7.30643	8.53312	8.79948	8.05469	1.16672	0.0305498
SBF2	TC1100010077.hg.1	8.56865	8.38658	8.41248	9.14614	9.03935	9.11584	0.644538	0.00181137
ZNF91	TC1900011926.hg.1	6.86711	5.66036	6.668	7.38675	8.07826	7.76995	1.3465	0.0488227
MIOS	TC0700006669.hg.1	5.32668	6.2059	6.21186	7.12388	7.386	6.89519	1.22021	0.0357579
PCMTD1	TC0800010417.hg.1	8.81698	8.3075	9.01274	9.70496	10.0228	9.5098	1.03345	0.019596
ZNF708	TC1900011919.hg.1	7.88754	6.97673	7.58032	8.27096	9.02466	8.62563	1.15889	0.0301112
USP24	TC0100014284.hg.1	6.03585	5.63146	6.792	7.80063	6.8193	7.87642	1.34568	0.048994
OSBPL8	TC1200011321.hg.1	8.15857	7.75704	7.85225	8.85689	8.91043	8.86772	0.955728	0.0144002
LYSMD3	TC0500011435.hg.1	7.76226	7.341	7.92234	8.29664	9.31758	9.12001	1.23621	0.0382203
SH2D1A	TC0X00008344.hg.1	11.4241	11.0721	11.3619	11.875	12.2983	12.189	0.834697	0.00796694
ATRX	TC0X00010126.hg.1	4.42793	5.06243	5.15576	5.74123	5.88473	6.22993	1.06992	0.0231045
SGK3	TC0800012313.hg.1	4.76117	4.39737	5.14969	5.52779	5.79296	6.38921	1.13391	0.0286727
WDR3	TC0100009580.hg.1	6.98982	7.05489	7.50644	7.8151	8.3963	8.23448	0.964913	0.0154287
UCN	TC0200012071.hg.1	3.81854	4.11903	4.0298	4.56676	4.90793	4.7588	0.755372	0.00489524
GK	TC0X00006891.hg.1	5.87788	6.38646	6.24492	6.84594	7.09245	7.45895	0.962691	0.0154267
FAM118A	TC2200007614.hg.1	9.37176	9.06649	9.34947	9.87745	10.3351	10.1027	0.842514	0.00852483
PARN	TC1600009482.hg.1	9.24228	9.53787	9.70963	10.5406	10.2875	10.2267	0.855028	0.00914062
AKAP13	TC1500008187.hg.1	8.03769	7.94568	7.77208	8.78684	8.78178	8.47432	0.762493	0.00520421
HSPA4	TC0500008664.hg.1	9.87286	10.0841	10.2233	10.7867	10.9216	10.9141	0.814043	0.00727111
ZKSCAN8	TC0600007402.hg.1	9.03379	9.17352	8.75594	9.70091	9.70555	10.0656	0.836273	0.00830606
HIF1A	TC1400010619.hg.1	10.4228	10.3614	10.336	11.1615	10.986	10.989	0.67211	0.00258212
PSMD1	TC0200011051.hg.1	7.51697	7.63087	8.30079	9.15368	8.8939	8.76844	1.12246	0.0283438
DDIAS	TC1100013075.hg.1	5.41266	6.08695	5.59887	6.84635	6.70381	6.85003	1.10057	0.0264179
STAM2	TC0200014623.hg.1	8.53577	8.57573	7.96877	9.38711	9.62733	9.06288	0.999014	0.018417
EIF4B	TC1200007687.hg.1	14.9255	14.6804	14.9986	15.5379	15.8073	15.5166	0.752457	0.00498262
CRNKL1	TC2000008573.hg.1	5.61736	4.41872	5.29102	5.92134	6.74898	6.56294	1.30206	0.0468146
NF1	TC1700007478.hg.1	9.43086	9.43101	9.11404	10.2217	10.2006	10.1072	0.851181	0.00925204
CALU	TC0700009061.hg.1	11.5613	11.6081	11.8566	12.2408	12.4578	12.5446	0.739097	0.00455512
THAP5	TC0700013606.hg.1	7.64113	7.91871	7.18212	8.29578	8.62385	9.07369	1.08378	0.0254402
NBR1	TC1700007942.hg.1	7.31118	7.12821	7.63534	8.1359	8.39792	8.26023	0.906437	0.0124242
MAP3K2	TC0200014170.hg.1	8.19029	7.12114	7.7871	8.98251	8.63587	9.17289	1.23091	0.0396893
NUP155	TC0500010515.hg.1	10.414	10.2929	10.2787	10.97	11.2848	11.0605	0.776587	0.00605685
ARHGAP11B	TC1500010707.hg.1	10.224	9.50641	9.40431	11.0036	10.7185	10.9374	1.17492	0.0343327
PIK3CB	TC0300014053.hg.1	6.15246	6.63288	6.55814	7.29601	7.18968	7.51244	0.884885	0.0114008
ALG11	TC1300007237.hg.1	5.29694	5.27961	4.89045	6.25195	5.94131	5.83147	0.85258	0.00964849
USP47	TC1100006860.hg.1	6.70925	6.37396	6.0457	7.0621	7.62838	7.39839	0.986651	0.0181875
ZFY	TC0Y00006487.hg.1	4.80829	4.46992	4.36841	5.50084	5.53603	5.41613	0.93546	0.014664
GPR52	TC0100010674.hg.1	3.74507	4.71621	4.08783	5.10872	5.16718	5.77477	1.16719	0.0339523
RFESD	TC0500013200.hg.1	5.89873	6.00603	5.85323	7.07293	6.83705	6.60544	0.919146	0.0136503
SWAP70	TC1100006820.hg.1	7.11458	7.2182	7.25884	7.8052	8.11065	7.93138	0.751873	0.00530739
NAA15	TC0400012846.hg.1	9.04608	8.31342	8.92051	9.75543	9.85803	10.0085	1.11398	0.0292505
C15orf40	TC1500010255.hg.1	7.075	7.38564	7.3835	7.99579	8.52778	8.08003	0.919823	0.0139
HIST1H2BI	TC0600007293.hg.1	11.5595	11.6593	11.9792	12.4413	13.0741	12.5996	0.97236	0.0175402
EXTL2	TC0100015079.hg.1	5.56535	4.74888	5.82763	6.2704	6.91817	6.66375	1.23682	0.0416601
NHLRC2	TC1000008961.hg.1	7.86116	7.98871	7.56576	8.7391	8.7833	8.74441	0.950397	0.0159977
ZNF507	TC1900007743.hg.1	7.31269	7.5867	6.90332	8.45549	8.19351	8.2733	1.03987	0.0228599
CDC73	TC0100011027.hg.1	7.88985	7.5795	7.65977	8.46804	9.00189	8.50248	0.947763	0.0159564
EPS15	TC0100014175.hg.1	8.86797	8.9656	8.77853	9.47568	9.63451	9.82703	0.775043	0.00635547
EPB41L5	TC0200009078.hg.1	7.99245	8.00385	8.45612	9.17468	9.14358	9.18342	1.01642	0.0212747
TGFBR1	TC0900008202.hg.1	4.30134	5.19497	4.56228	6.15654	5.61211	5.656	1.12202	0.0306688
ZNF638	TC0200007998.hg.1	5.67078	5.39328	6.10715	6.9337	6.37968	6.90826	1.01681	0.0216704
MFN1	TC0300009602.hg.1	7.3061	6.34972	7.07065	8.16701	8.32546	7.72102	1.16234	0.0350226
RTF1	TC1500007004.hg.1	10.6553	10.6288	10.7132	11.7851	11.3891	11.5241	0.900327	0.0132124
TMPO	TC1200008568.hg.1	12.267	12.019	12.7998	13.4635	13.4564	13.6017	1.14527	0.0336765
ATF7IP	TC1200006935.hg.1	8.03199	8.5972	8.15711	9.08845	9.2458	9.34339	0.963776	0.0178143
TRAPPC6B	TC1400009006.hg.1	8.92621	8.69076	8.84227	9.55336	9.86397	9.47094	0.809677	0.00827929
ARHGAP15	TC0200009539.hg.1	8.90387	9.43701	9.343	10.1575	10.3927	9.88429	0.916885	0.0145114
NR3C1	TC0500012340.hg.1	8.40793	8.83022	8.33192	9.54233	9.53671	9.41372	0.974226	0.018663
SMCHD1	TC1800006487.hg.1	6.40741	6.10453	6.28307	7.24347	6.89741	7.48961	0.945161	0.0165324
CIR1	TC0200014990.hg.1	7.63196	7.29304	7.46439	8.13411	8.3935	8.09213	0.74345	0.00544641
TAB3	TC0X00009339.hg.1	8.72204	7.77558	8.38091	9.63078	9.42675	9.49082	1.22328	0.042152
MOSPD2	TC0X00006671.hg.1	5.64915	5.31902	4.67924	5.97207	6.81911	6.36939	1.17105	0.0366418
RANBP9	TC0600010864.hg.1	12.1741	12.2598	12.3926	13.0365	12.8476	12.8387	0.632113	0.00221791
ANP32E	TC0100015725.hg.1	9.39788	9.66367	9.6079	10.3023	10.8305	10.3566	0.93998	0.0164944
PABPC1	TC0800012444.hg.1	14.495	14.4982	14.5912	15.0294	15.1883	15.1988	0.610687	0.00180569
SENP1	TC1200010566.hg.1	10.8985	11.0976	11.0806	11.636	12.1044	12.0468	0.903507	0.0143708
EIF3J	TC1500007093.hg.1	9.43566	9.81717	10.1822	10.6934	11.0865	10.7031	1.01596	0.0230573
ANK2	TC0400008450.hg.1	5.55161	5.56184	5.63165	6.12367	6.04083	6.1738	0.531068	0.000738688
XPOT	TC1200008002.hg.1	12.6388	12.6848	12.7229	13.1989	13.3664	13.3315	0.61677	0.00202364
FAR2P1	TC0200014244.hg.1	5.44876	5.28276	5.08001	6.46601	5.86135	6.35683	0.957551	0.018402
ACADM	TC0100018236.hg.1	9.01039	8.62303	9.2683	9.97655	10.0838	9.71485	0.957841	0.018594
ICA1L	TC0200015460.hg.1	6.9407	7.49592	6.8451	8.14569	8.37544	7.75406	0.997824	0.0219269
SLC17A9	TC2000008037.hg.1	5.53099	5.40841	5.06896	6.20918	6.62363	5.99648	0.940311	0.0175031
QSER1	TC1100007217.hg.1	7.69471	8.31112	8.21565	8.97069	8.94485	9.24235	0.978802	0.0206032
KIDINS220	TC0200016624.hg.1	6.79712	7.40772	7.28971	8.02165	8.3537	7.96075	0.947183	0.0181481
ZFP14	TC1900010521.hg.1	3.93622	4.22392	4.4605	5.21523	4.8175	5.50161	0.971233	0.0200551
INTS7	TC0100017229.hg.1	6.35694	6.07637	7.25448	8.29527	7.67514	7.50703	1.26322	0.0495281
WDR75	TC0200010246.hg.1	9.25439	9.09379	8.73089	9.92918	10.0612	9.82836	0.913214	0.015724
RSL1D1	TC1600009420.hg.1	11.3961	11.4063	11.9969	12.3752	13.0678	12.4534	1.03236	0.0254573
EIF2S2	TC2000008910.hg.1	4.44298	3.7155	3.78756	4.93799	5.51695	4.73808	1.08233	0.0301659
E2F3	TC0600007138.hg.1	6.79976	6.82267	6.78625	7.49371	7.44001	7.6355	0.72018	0.00525623
KIF5B	TC1000010249.hg.1	8.30644	8.4171	8.22537	9.45511	8.98534	9.14979	0.880446	0.013666
DPP8	TC1500009797.hg.1	8.29562	8.95925	8.75589	9.69322	9.8122	9.68426	1.05964	0.0283125
TRAPPC11	TC0400009467.hg.1	7.9524	7.77858	7.84286	8.49736	8.91113	8.66175	0.832132	0.0107664
FAM72C	TC0100015550.hg.1	13.0755	12.7258	12.6938	13.605	13.7529	13.7046	0.85577	0.0122113
MYH10	TC1700009694.hg.1	10.8443	10.6843	10.7856	11.5518	11.9883	11.5455	0.92378	0.0169272
CCDC15	TC1100009407.hg.1	5.56534	6.15006	6.17196	6.83324	7.15308	6.84921	0.982721	0.0216936
ANKHD1	TC0500008854.hg.1	9.20587	9.11506	9.0135	9.71382	9.76985	9.65841	0.602548	0.00194644
ZNF160	TC1900011328.hg.1	14.3412	14.1837	14.4088	15.056	14.9236	15.3251	0.79033	0.00872445
PIK3CA	TC0300009597.hg.1	7.19909	7.08096	7.84678	8.49346	8.75372	8.05115	1.05716	0.0291329
PRRC2C	TC0100010592.hg.1	9.49655	9.75796	8.98874	10.6102	10.5055	10.2738	1.04873	0.0283976
TOMM70A	TC0300011842.hg.1	10.0662	9.92117	10.256	10.7273	10.9232	10.759	0.72203	0.00568472
SP100	TC0200011023.hg.1	5.46273	5.6515	5.96579	6.56304	6.6905	6.63796	0.93716	0.0186359
ARID2	TC1200007425.hg.1	8.14214	8.96881	8.28308	9.51648	9.49917	9.76379	1.12847	0.0366815
SEC62	TC0300009458.hg.1	5.80134	6.27964	6.6887	7.55744	7.21843	7.34497	1.11705	0.0354947
SLC40A1	TC0200015211.hg.1	8.57306	8.58329	8.93463	9.45179	9.87088	9.36486	0.865513	0.0135233
PDZD8	TC1000011948.hg.1	8.1231	7.8703	7.89988	8.53773	9.02431	8.95165	0.873468	0.0142294
EIF2AK3	TC0200013376.hg.1	5.92342	6.72154	6.10226	7.18438	7.66561	7.04583	1.04953	0.029194
CDK17	TC1200011608.hg.1	10.5259	10.5877	10.8167	11.2086	11.5603	11.3449	0.727807	0.00612461
CDC27	TC1700010927.hg.1	9.89607	9.98329	9.70124	10.5286	10.7657	11.1589	0.957535	0.0208942
CSDE1	TC0100015353.hg.1	10.2864	10.308	10.5665	11.164	11.1392	11.7004	0.94756	0.0200664
PSIP1	TC0900009592.hg.1	8.55446	8.33302	8.32853	8.98167	9.39716	9.46136	0.874727	0.0145812
GOLGA5	TC1400008019.hg.1	6.30141	5.93158	5.8188	6.88111	7.24547	6.64829	0.907695	0.0170774
RINL	TC1900010631.hg.1	5.53906	5.73867	5.86351	6.54559	6.43554	6.49465	0.77818	0.00870282
TPH1	TC1100013150.hg.1	3.34564	3.22838	3.37145	4.10446	4.1625	4.66166	0.994384	0.0246166
ICE2	TC1500009639.hg.1	6.58839	6.01984	6.91895	8.01828	7.70725	7.15715	1.1185	0.0372051
CTDSPL2	TC1500007091.hg.1	9.25262	9.55262	9.68011	10.3093	10.4365	10.3496	0.870015	0.0145874
PIK3CG	TC0700008743.hg.1	7.06676	7.58496	7.82777	8.62523	8.63328	8.38517	1.05473	0.0307544
PPP4R3A	TC1400009982.hg.1	9.03089	9.33793	9.55952	10.4906	10.8417	9.90573	1.10323	0.0359587
RASA3	TSUnmapped00000531.hg.1	5.57291	5.47595	5.99059	6.6745	6.61662	6.33775	0.863141	0.0143729
DOCK10	TC0200015893.hg.1	6.06471	6.02352	6.65489	7.39615	6.97223	7.27078	0.965348	0.0225557
SF3B1	TC0200015348.hg.1	7.41279	7.30141	7.50694	8.32796	8.90017	8.18685	1.06461	0.0321458
CNOT1	TC1600010490.hg.1	11.7141	12.2117	11.9598	12.7796	12.9429	12.8396	0.892167	0.0170442
DIS3	TC1300009232.hg.1	7.90315	8.46676	8.14165	9.05003	9.17314	9.16461	0.958743	0.0226733
ZNF770	TC1500009005.hg.1	7.04272	7.00809	6.85546	7.73703	8.32478	7.80283	0.986119	0.0253961
DDX1	TC0200006788.hg.1	6.02601	6.73398	6.29509	7.46927	7.1978	7.39853	1.00351	0.0271125
CEP97	TC0300008182.hg.1	6.53399	5.97365	6.27057	7.09864	7.27951	7.19314	0.931025	0.0206854
ZNF555	TC1900006602.hg.1	6.76105	7.03159	7.34125	8.07882	7.62336	8.12839	0.898891	0.0180398
PPP3CA	TC0400011440.hg.1	8.89439	8.54092	9.03839	9.68918	9.42199	9.9328	0.856754	0.0148154
PNRC2	TC0100007344.hg.1	11.0646	10.9664	11.1443	11.7744	11.7335	11.5401	0.624213	0.00311876
XRCC5	TC0200010728.hg.1	12.1271	11.8234	12.1034	12.8447	12.7986	12.7324	0.77395	0.0095595
IARS2	TC0100011648.hg.1	11.2209	11.0227	11.1778	11.8442	11.8677	11.8477	0.712727	0.0064321
RNF6	TC1300010025.hg.1	7.63833	8.24344	8.28721	8.7774	9.44815	8.929	0.995188	0.0270224
PNPLA7	TC0900012069.hg.1	3.02407	3.17232	2.94219	3.82155	3.54312	3.72361	0.649902	0.00398698
UBE4A	TC1100009203.hg.1	10.5476	10.1731	10.4383	11.2369	11.1677	11.2552	0.833597	0.0134991
KLHL23	TC0200016561.hg.1	7.53793	7.21667	7.27851	8.00319	7.95219	8.31858	0.74695	0.00825162
MATR3	TC0500008810.hg.1	11.7748	11.3924	11.2504	12.1796	12.4023	12.4381	0.867457	0.0161277
ITPR1	TC0300006477.hg.1	4.36854	4.20053	4.17408	4.87732	5.64141	5.42299	1.06619	0.0351559
ATAD2	TC0800011679.hg.1	8.59123	8.22002	7.68773	9.27681	9.34262	9.36165	1.1607	0.0462201
POLI	TC1800007354.hg.1	6.05904	6.26412	6.09638	7.51866	6.92328	6.94733	0.989909	0.0272268
KIFAP3	TC0100016366.hg.1	8.26357	8.10234	8.00378	8.91131	8.76034	8.64023	0.647394	0.00404691
CAPZA1	TC0100009444.hg.1	10.9112	10.6785	10.9446	11.46	11.6128	11.4671	0.668557	0.00482773
ARHGAP12	TC1000010239.hg.1	6.07516	5.18869	5.95672	6.98433	6.87299	6.91266	1.18314	0.0492229
NPAT	TC1100012225.hg.1	5.79643	6.46089	6.25469	7.01719	7.08731	7.29997	0.964151	0.0250068
NUP107	TC1200008113.hg.1	5.86433	6.84742	6.27363	7.12069	7.62323	7.55889	1.10581	0.0401986
PDE5A	TC0400011712.hg.1	4.55949	4.94851	5.22509	5.94472	5.72757	5.95993	0.966373	0.0255295
ZNF521	TC1800008317.hg.1	3.9246	4.23148	4.84399	5.56552	5.34398	5.5136	1.14101	0.0448289
KIF15	TSUnmapped00000127.hg.1	5.70216	5.43842	5.89419	6.24748	6.6146	6.53293	0.786745	0.0110925
PPAT	TC0400010770.hg.1	10.2275	9.98923	10.2843	10.8147	11.0989	10.7492	0.720597	0.00735187
SNRNP48	TC0600006870.hg.1	8.25582	8.31598	8.54679	8.99166	9.16645	8.96068	0.666734	0.00495238
DDX46	TC0500013228.hg.1	6.72804	7.36628	7.36716	8.4771	7.74609	8.25418	1.00529	0.0296022
CCDC88A	TC0200012643.hg.1	7.85624	7.76987	7.27789	8.31893	8.46053	8.82514	0.900199	0.0196631
INO80	TC1500009138.hg.1	6.57058	6.09582	6.43397	6.96817	7.81216	7.39436	1.02477	0.0320084
EDEM3	TC0100016676.hg.1	7.59099	7.13486	7.51973	8.40437	8.36916	7.96247	0.830136	0.0143579
PRPF38B	TC0100009328.hg.1	7.01751	6.61815	7.156	7.50974	7.93559	7.91399	0.855886	0.0164971
EPC2	TC0200009612.hg.1	5.90152	5.38983	6.04685	6.83539	6.82821	6.48602	0.937141	0.0235781
AKAP7	TC0600009446.hg.1	3.84454	3.90653	3.89268	4.55993	4.63004	4.89982	0.815343	0.0135385
ANO6	TC1200007418.hg.1	12.0645	11.6731	11.7611	12.5458	12.5348	12.7236	0.76849	0.0104469
PTPRN	TC0200015773.hg.1	3.88007	4.1219	3.83544	5.17743	4.70242	4.62712	0.889853	0.0194838
LRRC58	TC0300012143.hg.1	8.70988	8.10932	8.35616	9.3133	9.36457	9.42022	0.974242	0.0274521
TAF2	TC0800011625.hg.1	8.85942	8.55851	8.39607	9.91285	9.29959	9.35863	0.919025	0.0223969
CENPJ	TC1300008371.hg.1	6.25339	5.66632	6.05349	6.74868	6.95283	6.98631	0.904875	0.0212365
GPR174	TC0X00007721.hg.1	6.4894	6.08517	5.91681	7.13178	6.7354	7.3775	0.917769	0.0224721
TTBK2	TC1500009200.hg.1	6.69295	6.2157	6.39887	7.3683	7.27844	7.03789	0.792368	0.0123508
SUGT1	TC1300007251.hg.1	7.46809	7.46125	7.63309	8.04091	8.22235	8.03079	0.577205	0.00242303
XYLB	TC0300013807.hg.1	8.06113	8.38176	7.96406	8.95168	9.279	8.71804	0.84726	0.0165792
HIST1H3H	TC0600007375.hg.1	9.9257	9.42137	10.1146	10.8393	10.9713	10.4706	0.939873	0.0249432
C5orf22	TC0500007048.hg.1	8.29876	8.32161	8.44594	9.01914	9.50292	9.15643	0.870725	0.0186221
SUZ12	TC1700007498.hg.1	8.98035	8.0633	8.92618	9.97936	9.81574	9.59585	1.14038	0.047891
IARS	TC0900010789.hg.1	10.1518	9.6425	10.352	11.0157	11.1415	11.1027	1.03789	0.035582
ZNF266	TC1900009583.hg.1	7.5309	7.73342	7.72583	8.35199	8.37097	8.80706	0.84663	0.0168482
PTPRC	TC0100011105.hg.1	10.8659	10.6721	10.9904	11.3867	11.6368	11.5066	0.667213	0.00562951
SMG1	TC1600009620.hg.1	12.5291	13.024	13.0337	13.6375	13.9051	13.6441	0.86664	0.0188076
HIST2H4B	TC0100009870.hg.1	13.1129	13.1684	13.463	14.0836	13.9658	13.8477	0.71759	0.00825274
UPF3B	TC0X00010652.hg.1	6.83883	7.49084	6.93674	7.9274	8.22108	7.98697	0.956347	0.02736
DICER1	TC1400010068.hg.1	4.83774	4.64313	4.29874	5.32212	5.42626	6.15322	1.04066	0.0367261
C6orf62	TC0600011071.hg.1	11.0063	10.8865	11.1006	11.6536	11.5844	11.5345	0.593003	0.00303507
BCAT1	TC1200010145.hg.1	10.8278	10.7954	10.6028	11.4065	11.5902	11.2575	0.676087	0.00619268
NUFIP1	TC1300008809.hg.1	7.91963	8.13158	7.97221	9.13366	8.68188	8.71804	0.836718	0.0164732
CXorf57	TC0X00008052.hg.1	8.271	8.15381	8.41429	8.8536	9.03743	8.80698	0.619638	0.00391142
RAB33B	TC0400008803.hg.1	8.60709	8.38304	8.84178	9.39292	9.58883	9.18278	0.777539	0.0121169
LNPEP	TC0500008157.hg.1	9.79296	9.55039	9.5635	10.3641	10.1202	10.3179	0.63179	0.00438741
AGAP4	TC1000010509.hg.1	9.25539	9.44101	9.63731	10.2928	10.1293	10.1568	0.748398	0.0104063
WDR17	TC0400009376.hg.1	4.85621	5.28343	4.76574	6.25146	5.52653	5.94813	0.940246	0.026427
RAD54B	TC0800011137.hg.1	6.97424	7.25221	7.27097	8.10289	7.75576	7.78853	0.716587	0.00850391
ANXA1	TC0900007576.hg.1	3.19517	3.34162	3.3009	3.7375	3.86932	3.74611	0.505079	0.00116243
AKAP11	TC1300006989.hg.1	7.41899	6.70093	6.92926	8.15678	7.57074	8.29712	0.991821	0.0321184
STIL	TC0100018440.hg.1	9.22842	9.13568	9.30331	10.1787	9.77487	10.0832	0.789795	0.0134014
ZNF431	TC1900007512.hg.1	8.21054	7.6462	8.00501	8.92991	8.8616	8.64616	0.858641	0.0190185
DDX52	TC1700010501.hg.1	9.02116	9.77074	9.59426	10.5218	10.5907	10.2096	0.978659	0.0311075
NBPF19	TC0100018285.hg.1	5.26063	5.35438	5.68844	6.12576	7.11834	6.39737	1.11267	0.0472901
WDFY1	TC0200015870.hg.1	6.2476	6.52055	6.46749	7.13063	6.94536	7.07851	0.639626	0.00495697
RAD17	TC0500007673.hg.1	8.65287	8.6478	9.15389	9.58404	9.96551	9.47753	0.857509	0.0191501
CDKL2	TC0400011043.hg.1	3.7801	4.17317	4.42627	5.26268	4.66496	5.26721	0.938439	0.0269662
EIF2S2	TC2000008909.hg.1	11.3792	11.8361	11.9369	12.5508	12.6822	12.6995	0.926767	0.0258338
PAK1IP1	TC0600006926.hg.1	7.24821	7.56528	7.67774	8.81756	8.72002	8.02083	1.02239	0.0364282
ZFYVE16	TC0500007912.hg.1	5.3155	5.56367	5.97178	6.56148	6.61357	6.65299	0.992363	0.0331288
FOXN2	TC0200007533.hg.1	7.34414	7.99126	7.8061	8.7921	8.4986	8.6281	0.925767	0.025982
ZNF585B	TC1900011934.hg.1	8.06476	8.23744	8.69421	9.06001	9.37726	9.27558	0.905479	0.0239495
KRR1	TC1200011301.hg.1	7.41497	7.89795	7.36075	8.74663	9.18881	8.1064	1.12272	0.049723
VCPIP1	TC0800012422.hg.1	6.30021	5.28568	6.0881	7.44571	6.88093	6.68684	1.11317	0.0488089
PRF1	TC1000010925.hg.1	6.2823	6.49404	6.60669	7.38279	7.73486	7.04702	0.927216	0.0266571
TCEB3C	TC1800008609.hg.1	4.27052	4.51179	4.53161	5.43118	5.21039	4.9704	0.766013	0.0125306
JADE1	TC0400008680.hg.1	7.6581	7.35749	7.47127	8.07456	8.30118	8.05067	0.646515	0.00562904
PRKCQ	TC1000009714.hg.1	10.5739	10.7061	11.0264	11.5192	11.6413	11.6432	0.832463	0.0180498
SLC25A36	TC0300008989.hg.1	8.18266	8.16252	8.2577	8.80926	9.32259	9.15623	0.895066	0.0240055
BTAF1	TC1000008452.hg.1	8.50683	8.5791	8.61297	9.61509	9.18285	9.37343	0.824152	0.0174796
METTL4	TC1800007895.hg.1	7.77859	7.37131	7.44958	8.17915	8.3078	8.3969	0.761454	0.0125711
LARS	TC0500012372.hg.1	9.95772	10.0942	10.4045	10.7304	11.0331	10.9626	0.756551	0.0122688
NUCKS1	TC0100017075.hg.1	12.2795	12.1383	12.1906	12.7063	12.8769	12.6905	0.555077	0.0024897
ZNF423	TC1600010244.hg.1	3.18697	3.19231	3.47446	4.24371	3.86266	4.58848	0.947036	0.0298956
BIRC3	TC1100013087.hg.1	4.84112	3.82553	4.30139	5.32923	5.774	5.092	1.07573	0.0456421
POLR2B	TC0400007617.hg.1	10.5391	10.5521	10.4315	11.2203	11.2408	10.9955	0.644667	0.00579895
TMEM161B	TC0500011408.hg.1	8.72118	8.90726	8.58754	9.38461	9.34293	9.76409	0.758555	0.0126896
RRM2B	TC0800011312.hg.1	5.74754	5.96757	6.217	7.08896	7.01533	6.48088	0.884353	0.0237281
MACF1	TC0100007898.hg.1	8.98418	8.80661	8.59712	9.78759	9.31015	9.92885	0.879555	0.0233103
ITGA4	TC0200010157.hg.1	9.3251	9.04865	8.86909	9.62399	10.2009	9.91784	0.8333	0.0190283
FAM217B	TC2000007942.hg.1	8.90883	8.84396	8.56223	9.57166	9.9576	9.35439	0.856212	0.0211734
HAUS6	TC0900009645.hg.1	8.40293	7.99842	8.69173	9.07457	9.48456	9.2495	0.905183	0.0263951
SLC38A1	TC1200010516.hg.1	12.752	12.4231	12.9343	13.8514	13.2336	14.2101	1.06189	0.045318
TBC1D15	TC1200008184.hg.1	7.14195	6.32578	6.46808	7.80638	7.71709	7.58992	1.05919	0.0450417
FEM1B	TC1500007671.hg.1	10.3686	9.99598	10.1215	10.7494	10.9696	10.8802	0.704422	0.00947659
KIF2C	TC0100008101.hg.1	9.72758	9.48084	9.57904	10.1156	10.4886	10.5994	0.805378	0.0170883
KIAA0430	TC1600009530.hg.1	7.64942	7.83042	7.99706	8.93104	8.37661	8.61955	0.816766	0.0181677
PDS5A	TC0400010484.hg.1	9.70933	9.15088	9.37811	10.1275	10.0865	10.4724	0.816026	0.0183429
HIST2H4A	TC0100015707.hg.1	13.0781	13.2537	13.4269	13.989	13.9954	13.8212	0.682293	0.00838286
SMARCA2	TC0900006473.hg.1	5.70337	5.95966	5.45022	6.34589	6.47803	6.65257	0.787746	0.0159177
USP7	TC1600009326.hg.1	11.618	11.7101	12.0645	12.4619	12.8504	12.4238	0.781183	0.0154036
SHTN1	TC1000011938.hg.1	9.40492	9.25313	9.23907	10.1855	9.87699	10.425	0.863456	0.0229591
BMP2K	TC0400007938.hg.1	11.0651	10.8922	11.0044	11.5832	11.4715	11.4404	0.511113	0.0017091
SOCS4	TC1400007221.hg.1	7.49058	7.39933	7.7769	8.07103	8.3046	8.41021	0.706343	0.00996167
RFX7	TC1500009514.hg.1	9.3589	9.83423	9.43175	10.4283	10.2122	10.4102	0.808603	0.0179942
ITGA6	TC0200009973.hg.1	7.13495	6.62552	7.15523	7.93678	8.13344	7.50186	0.885459	0.0256414
CAPRIN1	TC1100007247.hg.1	14.5069	14.5099	14.4465	15.0927	15.5392	15.3429	0.837183	0.0207845
MYO5A	TC1500009457.hg.1	5.21211	4.89924	5.3458	5.82245	6.03983	5.90968	0.771603	0.0149806
BUB1B	TC1500010715.hg.1	9.64753	9.40947	9.96323	10.4482	10.8153	10.2707	0.83802	0.0209257
DDX6	TC1100012495.hg.1	9.78758	9.50152	9.6403	10.3146	10.9374	10.4059	0.909508	0.0283742
TRIM47	TC1700011774.hg.1	3.66118	4.14499	4.37086	5.10367	4.6896	5.1101	0.90878	0.028436
ANKRD20A1	TC0900007472.hg.1	6.626	6.64625	6.9378	7.27066	8.08909	7.84158	0.997089	0.039116
KIF20A	TC0500008777.hg.1	8.50355	7.86095	8.87669	9.02515	9.7167	9.72219	1.07428	0.0493788
ESF1	TC2000008439.hg.1	5.94738	5.77137	5.49556	6.57807	6.56712	6.40317	0.778016	0.0157497
BBS9	TC0700007137.hg.1	7.14745	6.719	7.33646	8.45544	7.77958	7.79448	0.942196	0.0325449
MBNL3	TC0X00010837.hg.1	8.18736	8.35539	9.01417	9.64553	9.65522	9.22941	0.991079	0.0388464
ANKRD20A5P	TC1800009218.hg.1	6.69056	6.60674	6.64208	7.63019	7.2319	7.74297	0.888557	0.0267066
ASUN	TC1200010198.hg.1	9.29977	9.29263	9.31527	9.90007	10.2081	10.0422	0.747544	0.0134935
TFAP2C	TC2000007830.hg.1	6.16553	5.75703	5.64868	6.65713	6.71176	6.80282	0.866827	0.0248945
ADAL	TC1500007056.hg.1	7.52618	7.54039	8.24943	8.4914	8.8265	8.899	0.966971	0.0366156
AP3B1	TC0500011219.hg.1	5.94043	6.83055	6.46415	7.42012	7.11814	7.67667	0.993265	0.0400869
MRGPRD	TC1100011398.hg.1	4.52767	4.1658	4.16748	5.18776	4.9117	4.89164	0.71005	0.011116
ZMYM5	TC1300008229.hg.1	7.68886	7.78545	7.76278	8.26495	8.2917	8.14794	0.489171	0.00145864
ARHGAP27	TC1700010888.hg.1	4.42507	4.63068	4.39818	5.01079	5.33897	5.53884	0.811557	0.0195324
TCAF1	TC0700012898.hg.1	4.54553	4.85349	4.70453	6.08845	5.41036	5.45572	0.950329	0.034859
EID3	TC1200008678.hg.1	6.8399	6.93261	6.73822	7.38749	8.04221	7.90228	0.940414	0.0340242
SLU7	TC0500012663.hg.1	6.95607	6.70597	7.16545	7.77647	7.87102	7.44731	0.755771	0.0149979
TFRC	TC0300013684.hg.1	10.103	9.90367	9.70852	10.7259	10.5344	10.596	0.7137	0.011921
TBK1	TC1200008003.hg.1	5.27189	5.91987	5.84719	6.70263	6.45641	6.66065	0.926914	0.0331987
MALT1	TC1800007431.hg.1	7.70778	7.85383	8.06229	8.58021	8.36356	8.6875	0.669124	0.00895309
MTDH	TC0800008314.hg.1	12.7251	12.7691	12.696	13.2968	13.625	13.453	0.7282	0.0131917
FAM206A	TC0900008380.hg.1	7.74332	7.53244	8.07123	8.30782	8.92848	8.65504	0.848117	0.0243547
DCP2	TC0500008342.hg.1	9.61966	9.12433	9.2241	9.91178	10.3374	10.0583	0.779765	0.0176253
EDEM1	TC0300006491.hg.1	11.8021	11.6022	12.2323	12.5531	12.9057	12.7512	0.85784	0.0254861
ARHGEF12	TC1100009287.hg.1	5.2235	5.36016	5.34239	6.16453	5.90296	6.4682	0.869878	0.0270619
PRKCI	TC0300009468.hg.1	9.72481	9.05875	9.56509	10.1834	10.3454	10.5079	0.89604	0.0303167
HIST1H2BO	TC0600007384.hg.1	7.99085	8.17372	8.24114	8.95675	8.84469	8.59893	0.664884	0.00899899
ZNF274	TC1900009031.hg.1	3.6141	3.45914	3.21275	3.90516	4.4518	4.47683	0.849267	0.0250785
POU5F1	TC0600011406.hg.1	3.28862	3.54971	3.531	4.74118	4.17263	4.13603	0.893506	0.0301076
ANKRD22	TC1000011368.hg.1	4.23178	3.49138	4.01616	4.47914	4.9058	5.4815	1.04237	0.0498724
KNTC1	TC1200009209.hg.1	7.89577	7.22738	7.2588	8.10267	8.61	8.39072	0.907147	0.0319776
SFN	TC0100007486.hg.1	6.12505	6.50781	6.75116	7.12473	7.1894	7.59583	0.841982	0.0246321
COPB1	TC1100013145.hg.1	7.87877	8.04826	7.74487	8.56126	8.6069	8.48251	0.65959	0.00889144
GPR75-ASB3	TC0200016667.hg.1	9.41795	9.81135	9.71369	10.2826	10.389	10.459	0.729195	0.0140912
YTHDC1	TC0400010904.hg.1	8.34604	7.73904	8.267	8.95106	9.15456	8.89211	0.881879	0.0295268
BIVM-ERCC5	TC1300009992.hg.1	5.65922	5.79213	5.35952	6.29164	6.25186	6.46901	0.73388	0.0145297
HJURP	TC0200016099.hg.1	12.8052	12.9242	13.2107	13.672	13.7422	13.8044	0.759523	0.016895
EXOC2	TC0600010375.hg.1	7.55916	7.97926	8.01505	8.85066	8.40894	8.59277	0.766298	0.0175427
GVQW2	TC0600013341.hg.1	6.16248	6.12117	6.48872	7.03191	6.74224	7.18741	0.72973	0.0143427
USP34	TC0200012734.hg.1	7.82932	6.83775	7.30608	8.66811	8.22116	8.16283	1.02631	0.0490836
RAB3GAP1	TC0200009431.hg.1	6.10126	6.31784	6.6293	6.98393	7.78426	7.13853	0.952775	0.0389371
TSNAX	TC0100018359.hg.1	9.28546	9.27232	9.1204	9.83576	10.1164	9.7735	0.68249	0.0107833
RALGPS2	TC0100010755.hg.1	5.93835	6.73145	6.66157	7.29611	7.64604	7.35417	0.988316	0.0438488
UGGT1	TC0200009239.hg.1	11.0824	10.7645	10.6158	11.6753	11.6566	11.5653	0.811523	0.0223043
C18orf54	TC1800007355.hg.1	5.21945	4.55387	5.06573	5.77644	6.01284	5.73601	0.895414	0.0319533
MAN1A2	TC0100009568.hg.1	9.34394	8.89461	8.99879	9.87688	9.80708	9.94424	0.796955	0.0209054
NXN	TC1700009333.hg.1	8.63584	8.92032	8.7229	9.5383	9.21631	9.42342	0.632991	0.0076821
TUBB4B	TC0900009274.hg.1	12.5975	12.6471	12.6526	13.5367	13.7209	13.2106	0.85701	0.0276093
CENPF	TC0100011581.hg.1	5.71454	5.85794	6.34588	6.82531	7.00116	6.71138	0.873158	0.0295121
DBT	TC0100015061.hg.1	6.56894	5.92974	6.32637	7.17634	7.2596	7.03352	0.881471	0.0306488
PRC1	TC1500010463.hg.1	11.0151	11.2993	11.3384	11.8421	11.9616	11.9463	0.699087	0.0124484
TNPO1	TC0500007754.hg.1	8.71359	9.47861	9.32596	10.185	10.2194	10.1499	1.01206	0.0484821
GTF2I	TC0700008010.hg.1	11.4418	11.2715	11.461	11.828	11.9164	12.0407	0.536917	0.00339503
KDM1B	TC0600007103.hg.1	10.5786	10.2349	10.6293	11.2383	11.3166	11.2212	0.77773	0.0198456
IMPA1	TC0800010944.hg.1	6.94422	7.82081	7.69321	8.36892	8.85252	8.22185	0.995016	0.0467651
ZNF528	TC1900008699.hg.1	6.58121	6.1822	6.2208	7.27623	7.05628	6.83803	0.728777	0.0152892
ZAK	TC0200009986.hg.1	7.89566	7.13862	7.46396	8.55337	8.30633	8.46105	0.940839	0.0394407
HCFC2	TC1200008671.hg.1	5.31285	5.26879	6.05641	6.46134	6.41047	6.73245	0.988739	0.0462314
JADE3	TC0X00007119.hg.1	8.91611	8.61554	8.80719	9.40266	9.49384	9.25652	0.604723	0.00659087
SLTM	TC1500009585.hg.1	8.88626	8.68179	8.53483	9.28929	9.70569	9.29592	0.729339	0.01557
PAXBP1	TC2100007967.hg.1	7.86034	8.31591	8.59329	8.92123	9.05966	9.44612	0.885823	0.0327883
ZCRB1	TC1200010454.hg.1	11.3293	11.1473	11.3129	11.6972	11.7867	11.8483	0.51421	0.00277764
GOLGA8B	TC1500008995.hg.1	7.11106	6.72528	7.37983	8.00276	8.16473	7.60493	0.852083	0.028669
GCSAM	TC0300011988.hg.1	5.53331	5.31305	5.51839	5.92422	6.35493	6.3003	0.738231	0.0166252
ANKRD10	TC1300009810.hg.1	9.6135	9.76211	9.81376	10.3036	10.2919	10.1883	0.531447	0.00339111
RBL1	TC2000009026.hg.1	11.7236	11.3361	11.4897	11.9782	12.4358	12.3205	0.728407	0.0160413
CLTC	TC1700008465.hg.1	9.5007	9.05975	9.38259	10.0938	9.89751	10.1264	0.724902	0.0158343
TOP1	TC2000007380.hg.1	9.55545	10.1436	9.40843	10.6595	10.7985	10.3624	0.904304	0.0360976
GTDC1	TC0200014509.hg.1	6.38703	6.51001	6.60255	7.70446	7.12785	7.22923	0.853983	0.0297283
ABHD18	TC0400008666.hg.1	9.19982	9.00508	9.28951	9.76611	10.1624	9.73978	0.724639	0.0162672
MTF2	TC0100009054.hg.1	9.29495	8.94144	9.53351	10.1113	9.97591	10.1919	0.836398	0.0282715
VPS13A	TC0900007646.hg.1	4.61788	4.29157	4.63898	5.0283	5.15518	5.37677	0.670608	0.011761
KMT2E	TC0700008690.hg.1	8.54856	9.02622	8.9384	9.66417	9.70705	9.6369	0.831644	0.0278258
ZMYM4	TC0100007765.hg.1	7.77106	7.58786	7.44416	8.38425	8.35219	8.04159	0.65832	0.0108814
PLA2G16	TC1100011126.hg.1	5.84296	5.74048	5.77786	6.58556	6.34067	6.33967	0.634867	0.00928469
DAB2	TC0500013301.hg.1	10.9236	10.5583	10.7065	11.364	11.2303	11.5353	0.647083	0.0101502
CIT	TC1200012143.hg.1	6.92405	7.14063	7.05927	7.64409	7.73536	8.16579	0.807096	0.0252335
SLC11A1	TC0200010795.hg.1	2.37772	2.52738	2.53579	2.91487	2.96572	3.03302	0.490908	0.00236245
HSP90B1	TC1200008666.hg.1	9.76861	9.94664	9.7754	10.4586	10.4964	10.2443	0.569506	0.00553107
COPS2	TC1500009363.hg.1	7.50321	6.88379	7.05281	7.74131	7.90329	8.40665	0.870483	0.0334063
PPP2R5C	TC1400008333.hg.1	12.5751	12.2921	12.4572	12.969	13.0712	13.1033	0.606363	0.00762052
PHYHIP	TC0800009833.hg.1	3.86197	3.7191	3.56624	4.42694	4.39063	4.37188	0.680712	0.0130043
SYNRG	TC1700010497.hg.1	11.6938	11.4294	11.5558	12.0065	12.1333	12.2305	0.563753	0.00529534
DHFR	TC1800008333.hg.1	12.1671	12.0255	12.1152	12.5664	12.8586	12.7183	0.611833	0.00808356
OGN	TC0900010794.hg.1	3.74063	3.47452	3.25401	3.95415	4.43318	4.36632	0.761498	0.020874
SOX3	TC0X00010976.hg.1	2.40933	2.37895	2.4847	2.84065	2.90727	2.78554	0.420162	0.000931417
CNST	TC0100012272.hg.1	5.50007	5.52549	6.3077	6.39342	6.90887	6.90911	0.95938	0.0470847
SFR1	TC1000008798.hg.1	10.2494	9.90444	10.4724	11.0008	11.1458	10.8226	0.780982	0.0235009
ALKBH8	TC1100012209.hg.1	5.53015	5.23583	5.35154	6.33504	5.83553	6.39992	0.817653	0.0278682
GCC1	TC0700013616.hg.1	6.16537	6.4083	6.63342	7.01998	7.14491	7.23943	0.732408	0.0183795
TCEB3CL	TC1800009279.hg.1	4.35065	5.1472	4.97178	5.92077	5.76778	5.66286	0.960593	0.0475073
CENPU	TC0400012620.hg.1	6.89565	7.45447	7.49549	7.84075	8.56686	8.09868	0.886893	0.0371487
FYTTD1	TC0300010066.hg.1	9.97921	9.80328	9.933	10.6376	11.0735	10.5102	0.835268	0.0303159
ASF1A	TC0600009279.hg.1	10.7199	10.9466	10.8758	11.3669	11.5724	11.3091	0.568683	0.00597892
KDM5A	TC1200009550.hg.1	7.28966	7.71753	7.47026	8.20598	8.29226	8.06879	0.696527	0.0153302
ZCWPW1	TC0700011998.hg.1	3.30846	3.16758	3.22333	4.0573	4.33566	3.78068	0.82476	0.0293863
SNIP1	TC0100013747.hg.1	7.26809	6.95972	7.45476	7.75763	8.34107	7.95692	0.791017	0.0253313
ZNF675	TC1900011928.hg.1	10.1584	10.1686	10.3884	10.7238	10.7828	10.8877	0.55965	0.00554411
LRRC40	TC0100014562.hg.1	6.242	6.78094	6.40899	7.54652	7.63347	6.91626	0.888109	0.0378716
RPS27A	TC0200007628.hg.1	14.1734	14.2567	14.6943	15.0723	15.2632	15.2075	0.80623	0.02727
GPATCH4	TC0100016006.hg.1	9.62558	9.53888	9.88536	10.1343	10.4345	10.3991	0.639348	0.0106894
TNFAIP8	TC0500008437.hg.1	9.82647	9.62722	10.1681	10.7644	10.6825	10.4465	0.757223	0.0219298
PIAS1	TC1500007659.hg.1	11.0488	11.1936	11.5055	12.0219	11.8852	12.0617	0.7403	0.0201448
GABPB1	TC1500009386.hg.1	9.84258	9.64631	9.75391	10.3956	10.5112	10.1852	0.616403	0.00922901
ZBTB10	TC0800008062.hg.1	7.93786	8.52507	8.04791	9.03203	9.10581	8.91294	0.846642	0.0330726
DTX3L	TC0300008558.hg.1	8.02376	7.87679	7.94107	8.49107	8.76607	8.48216	0.632562	0.010444
STAT1	TC0200015242.hg.1	11.4763	11.4988	11.1903	12.0482	12.1292	12.0431	0.685057	0.0149017
RAPGEF5	TC0700010437.hg.1	7.0153	6.63477	7.18124	7.80901	7.89111	7.43722	0.768681	0.0236449
ACVR2B	TC0300007077.hg.1	5.12662	4.88379	5.11804	5.50906	5.88329	6.05037	0.771424	0.0240008
WDR36	TC0500008308.hg.1	8.45162	8.41857	8.41403	8.99219	9.54058	9.27794	0.842162	0.032967
TRPM6	TC0900010439.hg.1	3.342	3.64448	3.66826	4.00658	4.34708	4.22877	0.642563	0.0114422
CCDC47	TC1700012446.hg.1	10.7386	10.4143	10.9141	11.1682	11.9566	11.5965	0.88476	0.0389763
ASPM	TC0100016831.hg.1	6.11505	6.20511	5.9722	6.57462	7.26448	7.1769	0.907879	0.042399
RCAN3	TC0100007370.hg.1	6.75537	6.92613	6.77285	7.35796	7.28587	7.57449	0.587996	0.00763103
FMR1	TC0X00008668.hg.1	8.94159	8.80998	9.25962	9.7204	9.94147	9.49543	0.715364	0.0182319
GOLGA8O	TC1500008933.hg.1	4.57982	4.05167	4.24969	4.90233	4.96067	5.53349	0.838432	0.0328222
KRBOX4	TC0X00007107.hg.1	7.52038	7.46049	7.08116	8.17798	8.11009	8.14934	0.791798	0.0268437
STYX	TC1400007172.hg.1	10.9635	10.8434	11.1623	11.7119	11.5447	11.5161	0.60118	0.00854459
ADNP	TC2000009440.hg.1	12.0686	11.8777	11.727	12.4975	12.4279	12.6207	0.624307	0.0102303
SNX10	TC0700006984.hg.1	7.20545	7.42611	7.63423	8.22888	7.90761	8.15175	0.67415	0.0143962
SMARCA5	TC0400008882.hg.1	8.61425	8.65078	8.86627	9.21159	9.33055	9.33276	0.5812	0.0073333
FAM72A	TC0100017094.hg.1	12.9682	12.6008	12.5834	13.565	13.3257	13.292	0.67676	0.0148042
ST8SIA4	TC0500011579.hg.1	9.7911	9.35194	9.93658	10.605	10.5034	10.5487	0.859161	0.0362645
PNPT1	TC0200012652.hg.1	8.62718	8.67854	8.73964	9.19736	9.71076	9.55509	0.805949	0.0292234
PHF10	TC0600014374.hg.1	10.6749	10.4689	10.8661	11.3136	11.5773	11.1613	0.680757	0.0152708
SYCN	TC1900010644.hg.1	3.46605	3.45456	3.22358	4.00451	4.00798	3.89481	0.587707	0.00789905
TROVE2	TC0100011026.hg.1	7.01168	7.21724	6.96773	7.88557	7.52579	7.66165	0.625455	0.0106403
RBM3	TC0X00007195.hg.1	12.0269	11.784	12.0023	12.638	13.2063	12.5638	0.864927	0.0375763
RGPD3	TC0200013772.hg.1	3.83142	4.08847	4.59928	4.67646	5.16989	5.36841	0.898531	0.0427241
ZMYND10	TC0300011107.hg.1	5.14206	5.54104	5.48106	5.93875	6.23242	6.82343	0.943481	0.0498169
PRKRIR	TC1100011684.hg.1	8.98615	9.29125	9.61713	9.98502	10.3554	9.93434	0.793425	0.0283145
GOLGA8N	TC1500010712.hg.1	3.79148	3.83588	3.72369	4.60318	4.36851	5.02285	0.881164	0.0407032
BROX	TC0100011695.hg.1	7.84324	8.42568	7.87336	8.93638	8.9734	8.86056	0.876021	0.0401209
IGF2BP1	TC1700008186.hg.1	4.54075	4.83342	5.32965	5.73095	5.92309	5.84545	0.931892	0.0490986
BRCA1	TC1700010763.hg.1	6.88561	7.12191	7.43906	7.69093	8.11876	7.87984	0.747653	0.0234135
PAX6	TC1100010456.hg.1	7.83923	7.6668	8.11058	8.52188	8.38247	8.8426	0.710112	0.0194889
HIST1H3G	TC0600011142.hg.1	13.5329	14.038	13.6546	14.4263	14.8217	14.2794	0.767303	0.0261511
PRKAR1A	TC1700012297.hg.1	8.05121	8.57542	8.15712	9.09979	9.43794	8.73847	0.830819	0.0345836
PUM2	TC0200011901.hg.1	10.5517	10.5656	10.849	11.4048	11.2783	11.1023	0.60638	0.00996072
HIST1H2BJ	TC0600011184.hg.1	12.2803	12.9718	12.9954	13.4563	13.8995	13.5482	0.885497	0.0426665
TMEM132D	TC1200012424.hg.1	3.59719	3.56658	4.2472	4.37543	5.05605	4.62565	0.882056	0.04216
TSHR	TC1400007804.hg.1	9.78086	10.4106	9.96275	10.6659	11.1197	10.7624	0.797916	0.0302152
PCNP	TC0300008173.hg.1	11.7691	11.8567	11.9731	12.401	12.4108	12.2614	0.491413	0.00341663
WSB1	TC1700007319.hg.1	9.81482	9.89216	10.2807	10.5138	11.0627	10.6889	0.759237	0.0253799
ZNF652	TC1700011038.hg.1	9.02967	9.68569	9.46794	10.257	10.3013	10.2838	0.88626	0.0437025
SIPA1L1	TC1400007595.hg.1	6.13218	5.91514	6.5086	6.9116	7.13623	6.84523	0.779047	0.0284612
PPP1CB	TC0200016422.hg.1	10.3588	10.0647	10.4684	10.7421	11.0729	11.2806	0.734597	0.023037
USP25	TC2100006618.hg.1	9.1678	9.41854	9.35217	9.72308	10.0047	9.90011	0.563141	0.00733743
MYNN	TC0300009451.hg.1	6.14485	6.46423	6.71883	6.91019	7.39635	7.32537	0.768001	0.0272364
DMXL1	TC0500008431.hg.1	7.41822	7.40107	7.60937	8.00995	8.27957	7.95641	0.605759	0.010396
CDK5RAP3	TC1700012277.hg.1	10.8385	10.8799	10.9896	11.5282	11.6849	11.3532	0.619437	0.011528
SCAI	TC0900012276.hg.1	8.95634	8.3276	8.89347	9.57254	9.6957	9.50508	0.86531	0.0411063
C11orf57	TC1100009049.hg.1	7.89164	7.83122	8.31188	8.74765	8.80781	8.85253	0.791082	0.0305045
AGAP6	TC1000007598.hg.1	9.94977	10.0629	9.74959	10.6417	10.3341	10.6022	0.605288	0.0105177
SETD3	TC1400010170.hg.1	3.19992	2.8673	3.34562	3.80118	3.97573	3.85258	0.738885	0.0240004
SLC35F5	TC0200013943.hg.1	7.19858	7.28071	7.76156	8.66206	8.14316	7.96218	0.84218	0.0385024
HIST1H2BE	TC0600007278.hg.1	7.91354	7.89638	7.76326	8.25466	8.42524	8.28931	0.465346	0.00280543
DIXDC1	TC1100009043.hg.1	5.16714	5.48215	5.07251	5.93119	5.97687	6.01299	0.733087	0.0240083
DPY19L3	TC1900007744.hg.1	6.43088	6.30656	6.89699	7.05674	7.39518	7.5066	0.774697	0.0294383
GFPT1	TC0200012956.hg.1	10.5496	9.96958	10.6661	11.4149	11.031	11.2776	0.846082	0.0397069
SERINC5	TC0500011263.hg.1	5.88841	6.28882	5.91315	6.80959	7.0612	6.47851	0.752972	0.026721
CCSAP	TC0100017661.hg.1	6.33019	5.66295	6.05081	6.92373	6.57867	6.94023	0.799558	0.0331024
NASP	TC0100008127.hg.1	11.8395	11.8557	12.1305	12.5692	12.8971	12.4269	0.689147	0.0192747
SNORD102	TC1300006675.hg.1	15.1098	15.1439	15.2991	15.652	15.7741	15.5867	0.48663	0.0037425
DDX60	TC0400012366.hg.1	4.60149	4.79794	4.43005	5.48692	5.02313	5.53062	0.737061	0.0250495
ZNF639	TC0300009600.hg.1	9.57294	9.50283	9.8925	10.5923	10.3344	10.118	0.692125	0.0197282
RIOK1	TC0600006864.hg.1	8.91925	8.78246	9.04534	9.37686	9.77133	10.004	0.801715	0.0337978
NHSL1	TC0600014348.hg.1	4.60738	4.47527	4.54989	4.95714	5.21284	5.1797	0.572382	0.00874683
RBL2	TC1600007887.hg.1	10.0325	9.74597	10.0063	10.5121	10.6121	10.4752	0.60491	0.0114145
UCHL5	TC0100016786.hg.1	11.5255	11.6068	11.8238	12.228	12.3253	12.1078	0.56831	0.00859764
NAPEPLD	TC0700012115.hg.1	6.82365	6.6719	6.73462	7.4593	7.16263	7.42302	0.604925	0.0114714
ZNF100	TC1900010158.hg.1	10.5013	10.3832	10.6486	11.1185	11.1581	11.1118	0.61845	0.0127507
RP11-484D2.4	TC1100007367.hg.1	8.74925	8.51972	8.69393	9.0739	9.26352	9.42613	0.600218	0.0112262
ARMC1	TC0800010663.hg.1	10.1385	9.57904	10.222	10.8132	10.9949	10.5576	0.808733	0.0358315
CD44	TC1100007273.hg.1	4.68783	4.84429	4.98141	5.26768	5.42582	5.48323	0.554397	0.00783862
SPAG5	TC1700012380.hg.1	5.91025	5.78729	6.125	6.46947	6.441	6.68343	0.590452	0.0105474
USP28	TC1100012358.hg.1	6.39618	5.91177	5.95005	6.90863	6.88141	6.66141	0.731148	0.025414
CDV3	TC0300008863.hg.1	13.525	13.3998	13.8489	14.3686	14.3531	14.2821	0.743397	0.0270663
USP33	TC0100014653.hg.1	8.64694	8.25559	8.09769	8.92159	9.29927	8.97834	0.732992	0.0258141
EIF2S3	TC0X00006803.hg.1	13.8104	13.8243	14.1851	14.6178	14.8218	14.3921	0.67067	0.0184022
TTLL8	TC2200009140.hg.1	3.3322	3.36605	3.19432	3.87981	3.73923	3.69406	0.473516	0.00354577
ZNF254	TC1900007622.hg.1	9.73438	9.62383	9.88037	10.1359	10.4224	10.4369	0.585545	0.0105693
TGDS	TC1300009492.hg.1	9.83025	9.48326	9.63475	10.522	10.3167	10.0798	0.656731	0.0173651
SMTN	TC2200009259.hg.1	8.83719	8.96739	9.20061	9.62779	9.68291	9.71608	0.673864	0.0192689
RNF169	TC1100008435.hg.1	8.74484	9.28956	9.22193	9.86331	9.98949	9.65315	0.749873	0.0289068
ZNF283	TC1900008240.hg.1	8.8048	8.8263	9.14648	9.82678	9.41826	9.50006	0.65584	0.0175173
GPATCH8	TC1700010831.hg.1	11.6244	11.9088	11.6966	12.2165	12.3969	12.292	0.558523	0.00865809
GPBP1	TC0500007465.hg.1	7.27562	7.44024	7.36649	8.12418	7.78211	8.06371	0.629218	0.0147706
SLC16A1	TSUnmapped00000134.hg.1	8.33265	8.30867	8.39398	8.8154	9.0652	9.17743	0.674246	0.0196714
HIST1H2AG	TC0600014083.hg.1	15.8446	16.2451	16.2306	16.7238	16.9306	16.6559	0.663357	0.0184578
NCAPH	TC0200008502.hg.1	10.7694	11.2597	11.2402	11.937	11.8043	11.8681	0.78005	0.0337983
ALOX5AP	TC1300006770.hg.1	12.9065	12.7315	12.6264	13.2333	13.7966	13.4552	0.740253	0.0283415
KPNA4	TC0300012970.hg.1	8.90179	9.27527	9.18281	9.72405	9.866	9.63976	0.623316	0.0145877
HIST1H2BD	TC0600007274.hg.1	11.3912	11.4059	11.3737	11.7392	11.8137	11.7602	0.380767	0.000995005
USP14	TC1800006437.hg.1	10.5302	10.4686	10.9809	11.521	11.4553	11.169	0.721847	0.0261258
HIST2H2AB	TC0100015711.hg.1	13.4689	13.6221	13.7849	14.0813	14.2768	14.2223	0.568157	0.00978239
CDC23	TC0500012163.hg.1	8.88063	9.08304	9.16171	9.46305	9.87097	9.67583	0.628155	0.0152394
ZNF888	TC1900011318.hg.1	4.94124	4.89936	5.2205	5.42679	6.06295	6.17163	0.866755	0.0482405
BUB3	TC1000009172.hg.1	13.6107	13.7155	13.9564	14.4607	14.3674	14.2464	0.59726	0.0123233
NEDD1	TC1200008544.hg.1	7.36181	7.50442	7.61174	7.99011	8.44474	8.09281	0.68323	0.0214463
DIP2B	TC1200007615.hg.1	11.6644	11.8601	11.8059	12.3446	12.2887	12.3181	0.540297	0.00777594
ZNF24	TC1800008458.hg.1	7.48012	7.04206	7.24965	7.65686	8.14157	8.19002	0.738871	0.0287323
ACTR2	TC0200007835.hg.1	12.8673	12.7289	13.0702	13.4956	13.5874	13.5052	0.640643	0.0167939
ZNF525	TC1900008745.hg.1	4.92051	5.22675	5.31177	5.72973	5.64784	6.05335	0.657291	0.0186664
PUM3	TC0900009404.hg.1	6.92078	6.37746	6.44959	7.2462	7.32192	7.47409	0.764794	0.0327801
U2AF1	TC2100008286.hg.1	11.1727	11.2732	10.9011	11.6583	12.0111	11.6247	0.64903	0.0178488
ZNF43	TC1900010163.hg.1	9.41713	9.09599	9.18531	9.64539	9.86267	9.92666	0.57876	0.0110057
UCHL3	TC1300009979.hg.1	9.98601	9.82885	10.0985	10.7031	10.6162	10.362	0.589311	0.011936
THUMPD3	TC0300006542.hg.1	9.31725	9.08618	9.60857	10.1384	10.1075	9.92541	0.719778	0.0267052
DCAF13	TC0800008484.hg.1	10.1888	9.79275	9.95841	10.409	10.722	10.674	0.621645	0.0153136
ARG2	TC1400007500.hg.1	9.75364	9.63987	9.81839	10.4487	10.1342	10.3767	0.582573	0.0115791
DHFRL1	TC0300011760.hg.1	8.64849	8.24162	8.28627	9.05626	8.95015	9.16779	0.665937	0.0202446
METTL8	TC0200014899.hg.1	8.85637	8.91121	9.14339	9.48443	9.45011	9.79426	0.605944	0.013781
ZNF75D	TC0X00010895.hg.1	3.64085	3.46793	3.76493	4.6388	4.30116	4.09202	0.719425	0.0271994
LRMP	TC1200012606.hg.1	7.18271	6.91896	7.09224	7.6911	7.60652	7.6237	0.575802	0.0111449
INPP5D	TSUnmapped00000524.hg.1	4.30966	4.60098	4.33196	5.07657	5.00827	4.92176	0.587997	0.0122556
FANCD2	TC0300006575.hg.1	8.62034	9.2002	8.98235	9.83402	9.63413	9.56225	0.742505	0.0310853
TMEM99	TC1700007811.hg.1	7.73524	8.04874	7.78498	8.60337	8.41074	8.29724	0.580795	0.0119061
TLK2	TC1700008533.hg.1	10.5563	10.665	10.7194	11.3013	11.1455	11.0454	0.517187	0.00690567
ABAT	TC1600006826.hg.1	3.06089	2.97398	2.95342	3.47331	3.78167	3.99242	0.753038	0.0328411
DDB2	TC1100007470.hg.1	6.42344	6.61723	6.62427	7.0956	6.92575	7.13836	0.498254	0.00573355
HTATSF1	TC0X00008533.hg.1	9.86401	9.9476	10.3961	10.8228	10.6596	10.93	0.734929	0.0302381
CCNT1	TC1200010591.hg.1	10.2951	10.2405	10.5169	10.902	11.4188	10.9339	0.734093	0.0302982
VPS13D	TC0100006884.hg.1	4.12622	4.68452	4.8421	5.26858	5.22552	5.60956	0.816944	0.0433685
CNOT10	TC0300006978.hg.1	8.86506	8.85501	9.09241	9.59726	9.94072	9.41018	0.711888	0.0273212
RORA	TC1500009641.hg.1	6.7078	6.60725	7.27794	7.90358	7.6066	7.48239	0.79986	0.0407699
WNK1	TC1200006454.hg.1	6.3766	5.80371	5.83328	6.62167	7.00625	6.65887	0.757732	0.0342031
TPD52	TC0800012433.hg.1	13.6126	13.6095	13.8577	14.3809	14.3361	14.0731	0.570087	0.011332
GIGYF2	TC0200016601.hg.1	8.14877	8.2109	7.69338	8.76288	8.62145	8.86805	0.733113	0.0308677
IFIT5	TC1000008401.hg.1	5.42947	5.07177	4.91296	5.57256	5.93457	6.28243	0.791787	0.0403409
HP1BP3	TC0100013193.hg.1	10.7597	10.703	10.9139	11.3043	11.6152	11.2708	0.60456	0.0150896
STT3B	TC0300006942.hg.1	13.9958	13.3039	13.4949	14.3895	14.5454	14.3448	0.82839	0.0472828
ZNF644	TC0100014895.hg.1	6.25759	6.54825	5.98131	6.7074	7.26986	7.02867	0.739589	0.0328226
MDN1	TC0600012551.hg.1	7.79653	7.36648	7.88261	8.25804	8.5516	8.36229	0.708765	0.0285331
ZNF492	TC1900007570.hg.1	6.7733	6.52524	7.15729	7.38023	7.91334	7.4585	0.765416	0.0371321
HIST2H3D	TC0100015698.hg.1	9.9346	9.53775	9.96648	10.4673	10.6069	10.4139	0.683074	0.0250565
CLDND2	TC1900012017.hg.1	5.69107	5.9931	5.45096	6.40626	6.6331	6.19503	0.699756	0.0273787
SDCBP2	TC2000009964.hg.1	3.15027	3.5196	3.5362	4.08939	3.89005	4.5758	0.783059	0.0401505
SMC4	TC0300009337.hg.1	12.2359	11.5653	12.0121	12.7723	12.8372	12.579	0.791773	0.042381
GTSCR1	TC1800008988.hg.1	3.41462	3.65564	3.03222	4.30806	4.01941	4.01386	0.74628	0.0349753
MEF2A	TC1500008521.hg.1	10.3439	10.3437	10.3867	10.835	11.0168	10.8344	0.537307	0.0095119
XXbac-BPG154L12.4	TC0600007644.hg.1	2.41445	2.84149	3.08729	3.7262	3.51783	3.45806	0.786287	0.0418734
SHCBP1	TC1600010168.hg.1	8.46608	8.88082	9.20464	9.64568	9.85023	9.45979	0.801385	0.0444614
HIST1H2BM	TC0600007377.hg.1	15.3697	15.3884	15.554	15.9599	15.9698	15.7878	0.468483	0.00489359
ZNF862	TC0700009647.hg.1	5.39253	5.74561	5.52595	6.09216	6.36112	6.00664	0.598612	0.0157024
RMND1	TC0600013574.hg.1	8.07782	7.90851	8.20207	8.78804	8.52588	8.52325	0.549589	0.0108927
NOL10	TC0200011726.hg.1	9.1787	9.30847	8.86206	9.88984	9.73179	9.74529	0.672562	0.0250197
TMEM87A	TC1500009185.hg.1	7.8895	7.5862	8.16907	8.61506	8.73512	8.51538	0.740262	0.0350925
CAST	TC0500013205.hg.1	6.03027	5.85931	6.20631	6.66239	6.70498	6.66774	0.646409	0.0215987
2007-09-01	TC0700007178.hg.1	9.28934	8.95686	8.99282	9.62854	9.52445	9.86392	0.592628	0.0152676
KIFC1	TC0600007700.hg.1	9.86332	10.0519	10.3138	10.6865	11.1992	10.5914	0.749357	0.036705
ECD	TC1000011012.hg.1	11.8099	11.4641	11.5313	12.3967	12.0819	12.1066	0.593297	0.0154977
ENOX2	TC0X00010813.hg.1	6.70397	6.05458	6.36665	7.12838	7.33707	6.89672	0.745656	0.0364756
NR2C1	TC1200011573.hg.1	9.06578	9.08911	9.07751	9.77103	9.83297	9.52898	0.633527	0.02031
HNRNPA2B1	TC0700010538.hg.1	13.2059	12.6255	13.2491	13.6171	13.8701	13.9316	0.779447	0.0424043
FAM83D	TC2000007341.hg.1	9.7358	9.40821	9.97137	10.3952	10.5598	10.3139	0.717835	0.0323604
FNDC3A	TC1300007152.hg.1	6.15509	6.55024	6.5436	7.15688	7.10623	7.10626	0.706815	0.0307362
TPMT	TC0600010960.hg.1	10.7995	10.3319	11.0457	11.3517	11.7921	11.383	0.783227	0.0431818
XRN2	TC2000006899.hg.1	12.0437	12.0986	12.2831	12.6061	12.6203	12.7273	0.509463	0.00808006
PAPD5	TC1600007811.hg.1	9.86459	9.4582	9.79181	10.1058	10.4688	10.4413	0.633753	0.0209358
NGF	TC0100015368.hg.1	3.94342	3.90323	3.69178	4.65156	4.96831	4.27691	0.786119	0.0445625
DHX57	TC0200012299.hg.1	5.68614	5.95582	6.04776	6.59434	7.04646	6.36043	0.770501	0.0419541
SYNJ1	TC2100007964.hg.1	6.11576	5.8869	5.87452	6.85528	6.35832	6.66485	0.667095	0.0257448
SHQ1	TC0300011540.hg.1	9.83678	9.9244	10.1253	10.6814	10.7579	10.3342	0.629026	0.0209532
SNX6	TC1400008913.hg.1	10.6965	10.7366	10.7798	11.0411	11.0641	11.0989	0.330387	0.000639983
NKX3-1	TC0800009885.hg.1	7.39266	7.94446	7.83925	8.25554	8.92988	8.35378	0.787609	0.0457723
MFSD6	TC0200010264.hg.1	9.87123	9.57237	9.79505	10.3363	10.3777	10.2805	0.585286	0.0157718
CNOT6L	TC0400011108.hg.1	8.72146	8.59783	8.81266	9.10787	9.57462	9.44624	0.66559	0.0261761
HNRNPU	TC0100018569.hg.1	15.3074	15.0472	15.4305	15.6714	15.9383	15.9489	0.591193	0.0165597
CLASP2	TC0300010682.hg.1	3.70215	3.33938	3.10795	4.34882	3.90345	4.03807	0.71362	0.033649
GOLGA8A	TC1500008988.hg.1	7.16553	7.31587	7.32597	8.0437	7.92441	7.66322	0.607987	0.0187047
ANKRD26	TC1000010113.hg.1	6.24411	6.82833	6.51728	7.62827	7.06873	7.12454	0.743936	0.0387911
NUDT21	TC1600010407.hg.1	12.4472	12.3236	12.4052	12.8544	13.4991	13.1887	0.788737	0.0468826
CLCN5	TC0X00007240.hg.1	4.95622	4.72593	5.3634	5.89735	5.44438	5.94315	0.746443	0.0394215
HIST1H3F	TC0600011140.hg.1	13.9513	14.0396	14.3804	14.8021	14.8553	14.68	0.655423	0.0251731
EFTUD1	TC1500010234.hg.1	8.56804	8.43638	8.29345	9.07046	8.92273	8.83206	0.509123	0.00883496
TPX2	TC2000007089.hg.1	11.3583	11.2581	11.2416	12.0161	11.7375	12.2581	0.71792	0.0350332
FAM72B	TC0100015509.hg.1	13.0689	12.5068	12.5601	13.5938	13.4329	13.3121	0.73433	0.0378347
NEK2	TC0100017216.hg.1	9.31509	9.03779	9.0343	9.84007	9.50613	9.73563	0.564882	0.0141697
AGO4	TC0100007784.hg.1	6.28824	6.90446	6.88481	7.50548	7.60262	7.2833	0.771295	0.044507
FANCI	TC1500008252.hg.1	7.94851	7.57183	7.87005	8.27492	8.35469	8.53131	0.590179	0.0172765
FAM21A	TC1000007603.hg.1	10.2374	9.89749	10.212	10.77	10.755	10.5983	0.592123	0.017512
MTR	TC0100012101.hg.1	7.40774	8.05908	7.89847	8.57058	8.69782	8.3661	0.756404	0.042324
CHUK	TC1000012585.hg.1	5.00217	4.97764	5.20914	5.64146	5.92792	5.49002	0.623483	0.0216965
LANCL1	TC0200015608.hg.1	9.00171	9.1426	9.42265	9.59154	9.99822	9.85324	0.62534	0.0219623
ROBO1	TC0300011628.hg.1	8.21423	8.48561	7.91971	8.82144	8.95932	9.00393	0.721713	0.0366702
DLG1	TC0300013736.hg.1	10.3795	10.2726	10.2799	10.6953	10.8602	10.6966	0.440053	0.00443748
SAMD11	TC0100006476.hg.1	4.40541	4.37629	4.92877	5.04976	5.53147	5.2912	0.720651	0.0367175
BARD1	TC0200015643.hg.1	8.21656	8.11367	8.53705	9.08093	9.31985	8.66909	0.734197	0.039513
LRP6	TSUnmapped00000012.hg.1	4.04604	4.68182	4.03087	5.20358	4.77145	5.11287	0.776389	0.0471529
ABL2	TC0100016548.hg.1	7.84113	8.13681	8.0642	8.58663	8.64825	8.39434	0.529031	0.0113085
RALGAPB	TC2000007320.hg.1	10.3786	10.6719	10.6852	11.216	11.0449	11.1728	0.565993	0.0152953
PARP15	TC0300008559.hg.1	5.71017	5.6437	5.87442	6.88351	6.18818	6.49806	0.780493	0.0483932
CDK19	TC0600012839.hg.1	7.91902	8.21338	7.7783	8.67879	8.66642	8.40518	0.613225	0.021302
AFF4	TC0500012032.hg.1	8.78972	8.61848	8.60898	9.50422	9.28659	9.07941	0.61768	0.0219432
PTPRG	TC0300007645.hg.1	5.656	5.35516	5.75496	5.99566	6.23217	6.34036	0.600693	0.0198392
TFAM	TC1000007701.hg.1	10.9369	10.8336	10.9723	11.2834	11.4757	11.318	0.444777	0.00502474
LGALS8	TC0100012097.hg.1	7.98202	7.73439	7.69867	8.22556	8.53691	8.29501	0.547469	0.0135879
PSMC1	TC1400007947.hg.1	11.0181	10.7195	10.8094	11.3979	11.8151	11.3259	0.663997	0.0291276
DOCK2	TC0500009378.hg.1	10.3427	9.9812	10.5447	10.7268	11.0759	11.1234	0.685848	0.0327747
TMOD3	TC1500007240.hg.1	10.3208	10.0275	10.0656	10.7617	10.5043	10.7681	0.540077	0.013086
GGNBP2	TC1700007638.hg.1	9.9132	9.72232	9.9866	10.8313	10.7637	10.2432	0.738676	0.0420195
RTP1	TC0300009795.hg.1	2.86129	3.35425	3.03334	3.5135	3.79858	3.86983	0.644346	0.0265877
MED1	TC1700010571.hg.1	10.2445	10.1614	10.1501	11.0735	10.7905	10.6544	0.654147	0.0282216
GPR180	TC1300007731.hg.1	6.62748	7.1817	6.77298	7.80631	7.21597	7.8144	0.751507	0.0454082
C10orf88	TC1000012088.hg.1	8.47105	8.50349	8.65938	9.09588	9.56313	9.07182	0.698971	0.0362335
BTBD9	TC0600011714.hg.1	6.91029	7.18988	7.08261	7.47912	7.75229	7.51442	0.521018	0.0117166
KIAA1143	TSUnmapped00000180.hg.1	7.64619	7.41498	7.10988	7.75878	8.23094	8.3041	0.707592	0.0379542
ZNF140	TC1200009528.hg.1	6.18335	6.41202	6.40257	6.85915	7.10518	6.73241	0.566262	0.0168242
NSMCE2	TC0800008786.hg.1	9.04091	8.73645	9.0912	9.55477	9.56095	9.63287	0.626676	0.0251555
TMEM123	TC1100012121.hg.1	14.6515	14.6871	14.5312	14.9734	15.2453	15.2152	0.521373	0.011962
EIF5B	TC0200008587.hg.1	7.34941	7.45051	7.90414	8.18868	8.11481	8.46617	0.688536	0.0351232
BRWD1	TC2100008165.hg.1	7.1786	7.29895	7.15024	8.20819	7.61331	8.03057	0.741422	0.0446663
CTR9	TC1100006840.hg.1	7.41337	6.92678	6.92549	7.64768	7.9369	7.71663	0.678524	0.0335119
DARS	TC0200014407.hg.1	14.2752	14.0414	14.1674	14.6153	14.7097	14.6423	0.4944	0.00947305
TMEM71	TC0800012469.hg.1	2.61071	2.40162	2.59221	3.01146	2.89047	3.08364	0.460345	0.0067324
RDH11	TC1400010765.hg.1	9.01324	9.36599	9.51647	9.93339	10.0867	9.88261	0.668991	0.0320733
LIMS1	TC0200008806.hg.1	7.94005	8.18352	7.97752	8.43512	8.68245	8.47685	0.497776	0.00982958
HMGB2	TC0400012432.hg.1	12.8901	13.2445	13.5076	13.7186	14.0811	13.9534	0.703633	0.0380581
DDHD2	TC0800007330.hg.1	10.0588	9.76487	9.91984	10.3541	10.4587	10.4983	0.522545	0.0122606
MTPAP	TC1000012538.hg.1	9.31996	9.45612	9.53328	10.0273	10.3019	9.8523	0.624062	0.0253293
SYT6	TC0100015342.hg.1	6.72628	6.81176	6.96412	7.44158	7.20289	7.29099	0.477759	0.00832561
ZNF829	TC1900010543.hg.1	3.18806	2.93186	2.87499	3.5575	3.63173	3.51181	0.568709	0.0180401
CD1B	TC0100016065.hg.1	3.72585	4.24817	4.13457	4.62239	4.82861	4.72198	0.688128	0.0362978
FAM109A	TC1200011931.hg.1	3.77302	3.28673	3.57236	4.1065	4.15719	4.30934	0.646977	0.0296124
EXOSC9	TC0400008604.hg.1	10.7811	10.6441	10.79	11.0848	11.1662	11.1786	0.404827	0.00366104
ABCC4	TC1300009505.hg.1	7.40019	7.56015	7.78028	8.04774	8.49558	8.09044	0.631051	0.0275249
TTC34	TC0100018394.hg.1	6.72953	6.1421	6.66075	7.24582	7.45886	6.96518	0.712491	0.0415512
GTF2A1	TC1400009834.hg.1	9.99318	9.56229	9.89382	10.5077	10.4911	10.3654	0.638284	0.0287092
JMY	TC0500007881.hg.1	6.45119	6.22708	5.93155	7.25065	6.80654	6.6634	0.70359	0.0400459
BBS7	TC0400011749.hg.1	7.81966	7.4633	7.51359	8.2045	8.26643	8.19849	0.62429	0.0267074
C2CD5	TC1200010119.hg.1	7.86383	7.94977	7.76386	8.56573	8.22598	8.63553	0.616595	0.0257733
PRR34	TC2200009000.hg.1	4.38744	4.8215	4.55632	5.10876	5.05178	5.43254	0.609271	0.0246853
OSBPL3	TC0700010504.hg.1	7.09424	6.78498	7.38957	7.61102	7.80377	7.92944	0.691812	0.0385664
C18orf25	TC1800007218.hg.1	8.61501	8.40873	8.63612	8.94893	9.17769	8.97645	0.481071	0.00928471
TUBGCP5	TC1500008706.hg.1	8.31038	8.11115	8.36121	8.62851	8.954	8.77141	0.523724	0.0136384
KLHL23	TC0200016563.hg.1	8.74489	8.37639	8.87598	9.20447	9.17122	9.5607	0.646381	0.0308174
ACTG2	TC0200008062.hg.1	5.60411	5.27364	5.69746	6.05759	6.01347	6.54347	0.679771	0.036651
GPATCH2L	TC1400010632.hg.1	8.28964	8.65112	8.96106	9.14887	9.4394	9.48164	0.722696	0.0449027
API5L1	TC0X00010591.hg.1	3.21483	3.44684	3.46985	3.75443	4.12915	4.37945	0.710503	0.0426041
USP45	TC0600012656.hg.1	5.94904	5.75272	6.28691	6.41857	6.67843	6.85886	0.65573	0.0331059
ZNF426	TC1900009586.hg.1	7.34707	6.95785	7.26321	7.96336	7.64018	7.70004	0.578484	0.0210983
SLC39A6	TC1800008474.hg.1	8.86188	9.1832	9.16731	9.67537	9.731	9.44686	0.546948	0.0168956
ANXA3	TC0400007933.hg.1	7.92125	7.82335	7.53714	8.26293	8.30652	8.86599	0.717898	0.0447818
PRKAA1	TC0500010580.hg.1	11.5532	11.302	11.0985	11.9148	12.0976	11.7474	0.602023	0.0247417
FAM175B	TC1000009217.hg.1	7.73726	7.97721	8.3126	8.74758	8.76799	8.68453	0.724339	0.0463888
EDRF1	TC1000009240.hg.1	6.65059	6.61581	6.58337	7.19835	7.11029	7.55801	0.672293	0.0367964
HIST1H2AE	TC0600007285.hg.1	15.1645	15.0398	15.6028	15.9405	16.0163	16.0341	0.727957	0.0473773
LMBR1	TC0700013224.hg.1	4.28889	3.69531	4.18126	5.09773	4.81327	4.45329	0.732941	0.0484134
KIAA1143	TC0300010903.hg.1	10.1456	10.4745	10.3273	10.8176	11.3053	10.813	0.662823	0.0351841
KLK11	TC1900011234.hg.1	3.31869	3.47826	3.27655	3.73489	3.86591	4.07895	0.535418	0.0159321
NUBPL	TC1400010592.hg.1	6.21775	6.45598	6.66848	6.86815	7.19728	7.06594	0.596384	0.0243787
APH1B	TC1500007520.hg.1	9.55134	9.6461	9.85033	10.2888	10.0824	10.1892	0.504211	0.0124094
ATF1	TC1200007622.hg.1	9.82651	9.74547	10.1845	10.6067	10.4076	10.5962	0.618024	0.0279431
HIST1H4D	TC0600011134.hg.1	13.7778	13.4054	13.8253	14.3796	14.3077	14.2172	0.631997	0.0302519
C3orf38	TC0300008018.hg.1	8.36875	8.15961	8.12071	8.57904	9.06821	8.87897	0.625719	0.0292648
PCNX	TC1400007588.hg.1	10.7308	10.8459	10.7715	11.1394	11.2213	11.0847	0.365773	0.00238016
GAPVD1	TC0900008750.hg.1	7.04517	7.17815	6.7335	8.00051	7.37064	7.66681	0.693711	0.0414888
ARHGAP28	TC1800006571.hg.1	4.17312	3.66383	3.99371	4.48548	4.7211	4.55926	0.645061	0.0327824
TAF3	TC1000006704.hg.1	6.99602	7.14571	7.03495	7.43149	7.69041	7.50217	0.482459	0.0104297
XPR1	TC0100010806.hg.1	10.5644	10.4113	10.415	10.9804	10.7828	10.8938	0.422133	0.00544784
ADAR	TC0100015921.hg.1	8.39826	8.49468	8.76968	9.09972	9.45051	8.97326	0.620293	0.0291431
ZFP69B	TC0100007958.hg.1	5.24138	4.96222	4.55938	5.43002	5.75552	5.7389	0.720493	0.0476903
BAG5	TC1400010320.hg.1	10.5368	10.2536	10.5017	10.909	11.0945	10.8188	0.51008	0.0135939
CNOT6	TC0500009725.hg.1	9.43623	9.09636	8.93468	9.74645	9.7302	9.92653	0.645305	0.033599
USP16	TC2100006852.hg.1	7.67226	7.26496	7.52785	7.85959	8.10975	8.30512	0.603129	0.0266828
ZNF484	TC0900010814.hg.1	3.55948	4.1671	4.06739	4.43228	4.81104	4.65088	0.700077	0.0441763
CYP20A1	TC0200010516.hg.1	8.0286	8.06287	8.05059	8.45703	8.56689	8.4273	0.436388	0.00684871
PTPN11	TC1200008916.hg.1	10.7812	10.9831	10.6857	11.5782	11.3119	11.2085	0.54953	0.0191882
NPM1	TC0500009422.hg.1	13.3048	13.3057	13.7488	13.8881	14.1688	14.176	0.624503	0.0308713
PRM3	TC1600009397.hg.1	4.84206	5.14368	4.98688	5.33671	5.58388	5.73644	0.561469	0.0209313
NBPF12	TC0100009770.hg.1	9.13366	8.949	8.85333	9.56042	9.34289	9.78234	0.583221	0.0241862
ANKRD28	TC0300010413.hg.1	8.80973	8.61618	8.60886	9.18093	9.11222	9.52721	0.595195	0.0261368
RBPJ	TC0400007120.hg.1	6.69351	6.64893	6.73365	7.07906	7.58125	7.48899	0.69107	0.0434189
BCAS2	TC0100018465.hg.1	9.82336	9.41976	9.32555	10.2476	10.2261	10.0654	0.656809	0.0369551
DYNC1I2	TC0200009959.hg.1	8.52657	8.15185	8.81212	9.17452	9.37805	9.06432	0.708783	0.0471546
TXNRD1	TC1200008675.hg.1	11.2004	11.0914	11.6202	11.6824	12.2075	12.0355	0.671127	0.0398328
FARSB	TC0200015838.hg.1	12.2783	12.4413	12.7314	13.2303	13.0287	12.9819	0.596653	0.0266643
FYB	TC0500010553.hg.1	14.1047	13.7497	13.7196	14.1988	14.6014	14.6135	0.61324	0.0294413
TMED5	TC0100014947.hg.1	10.2553	10.1022	10.3198	10.7517	11.0326	10.6232	0.576723	0.0236544
BPIFB1	TC2000007150.hg.1	2.19597	2.1272	2.39101	2.7799	2.78803	2.71773	0.523827	0.016277
ZNF337	TC2000008755.hg.1	6.57825	6.50033	6.67182	7.03465	7.33524	7.01755	0.545681	0.019267
CASD1	TC0700008360.hg.1	9.67708	9.93839	9.8804	10.1762	10.6429	10.4895	0.604248	0.0283565
FAM169A	TC0500013328.hg.1	7.84916	7.9207	7.83778	8.28538	8.55709	8.81129	0.682041	0.0427053
CNOT2	TC1200008162.hg.1	10.8918	10.7793	10.9584	11.4619	11.7808	11.2964	0.63652	0.0341261
EXOC4	TC0700009211.hg.1	10.0944	10.4478	10.546	10.871	11.1151	10.9194	0.605733	0.028762
S100A5	TC0100015865.hg.1	3.90568	4.12986	4.29567	4.92416	4.65374	4.50434	0.583679	0.0252535
JAK1	TC0100014457.hg.1	8.69701	8.51548	8.32596	8.8439	9.24848	9.37345	0.64246	0.0353662
ZUFSP	TC0600012971.hg.1	6.33863	5.94762	6.46331	6.87311	7.03614	6.76754	0.642412	0.0353796
PIGK	TC0100014638.hg.1	8.01568	7.94382	8.48875	8.92768	8.56401	8.94523	0.66289	0.0395957
C21orf59	TC2100008559.hg.1	9.1828	9.25339	9.45113	9.86036	9.81497	9.83237	0.540127	0.0191601
CBWD3	TC0900007475.hg.1	9.60031	9.63713	9.58816	9.95596	9.97015	10.0768	0.392437	0.00434132
C1orf61	TC0100018511.hg.1	3.24922	2.90828	2.80707	3.53116	3.7664	3.44011	0.591032	0.0271015
ZNF564	TC1900011886.hg.1	6.55296	6.9465	6.87314	7.42333	7.44026	7.33636	0.609116	0.0302637
EPB41	TC0100007574.hg.1	12.0426	12.0787	11.7614	12.4728	12.588	12.4058	0.527963	0.0181667
IFT172	TC0200012082.hg.1	6.74632	6.83559	6.87601	7.34553	7.1623	7.44678	0.498897	0.014387
COX7A1	TC1900010513.hg.1	4.39427	4.36404	4.08729	4.89206	4.81227	4.75601	0.538243	0.0197428
NEK7	TC0100011096.hg.1	9.72073	9.17315	9.47611	10.369	10.1674	9.82516	0.663828	0.0415283
TAF9	TC0500010999.hg.1	11.2605	10.9746	11.2882	11.653	11.8996	11.5717	0.533687	0.0191788
SPIRE1	TC1800008121.hg.1	4.99929	4.52287	4.39102	5.01675	5.53805	5.43329	0.691635	0.048254
ANKMY2	TC0700010352.hg.1	8.15764	7.60505	8.09972	8.43401	8.66042	8.76095	0.664325	0.0427397
MAPK15	TC0800009212.hg.1	4.21888	4.62025	4.65507	4.93113	5.51003	5.05776	0.668237	0.043546
MORC4	TC0X00010459.hg.1	4.35284	4.83802	4.61998	5.64748	5.15786	5.0472	0.680569	0.0462919
WTAP	TC0600010056.hg.1	11.7556	11.5419	12.0402	12.4334	12.4854	12.3534	0.644857	0.0390555
SUV39H2	TC1000006859.hg.1	6.6483	6.73161	6.2484	7.28291	7.01443	7.18994	0.619653	0.034236
TNPO3	TC0700012555.hg.1	11.475	11.2883	11.3386	11.704	11.8121	11.9729	0.462413	0.0109298
MGME1	TC2000006813.hg.1	10.6855	10.2137	10.6724	11.2297	11.1254	11.2231	0.66889	0.0443064
TMEM87B	TC0200008900.hg.1	9.16224	9.35469	9.60293	10.1001	9.834	9.9011	0.571775	0.0262185
CDH4	TC2000007973.hg.1	7.80917	7.9161	8.05382	8.28646	8.62288	8.88371	0.671322	0.0450093
APOL6	TC2200007214.hg.1	7.1865	6.75202	7.17174	7.54586	7.86327	7.50945	0.602776	0.0317218
TATDN3	TC0100011543.hg.1	8.97693	9.01868	9.00255	9.3109	9.27886	9.36195	0.317848	0.00144
TMEM244	TC0600013155.hg.1	2.90015	3.11653	3.17591	3.6703	3.53096	3.4242	0.477626	0.0129332
MYOM3	TC0100013313.hg.1	2.7428	2.73895	2.65391	3.07457	3.28698	3.12126	0.449046	0.00989065
SYNCRIP	TC0600014322.hg.1	10.6854	10.8387	10.944	11.3437	11.5754	11.1798	0.543573	0.0221347
ZNF766	TC1900008691.hg.1	7.48202	7.44367	7.73118	8.10186	7.94481	8.45459	0.614796	0.0344609
LOC101927550	TC0700013412.hg.1	5.27006	5.60346	5.30244	5.92631	5.94949	6.01548	0.571773	0.0268559
GDAP2	TC0100015434.hg.1	9.23015	8.79695	8.96508	9.70026	9.33461	9.72324	0.588645	0.0298301
ASAH1	TC0800009752.hg.1	9.42711	9.44183	9.65776	9.97436	10.0753	9.84412	0.455683	0.0107086
CFAP97	TC0400012634.hg.1	8.65668	8.52131	8.11552	8.98374	8.99699	9.23614	0.641119	0.0398224
PLEKHA8	TC0700007065.hg.1	8.13965	8.10482	8.32033	8.80038	8.75156	8.49922	0.495454	0.0154436
FOXJ1	TC1700011786.hg.1	3.72852	3.53541	4.06841	4.31928	4.40764	4.52976	0.641446	0.0401276
EEPD1	TC0700007191.hg.1	4.29362	4.79768	4.79194	5.38152	4.99364	5.4741	0.655339	0.0430786
U2AF1	TC2100007492.hg.1	12.0587	12.403	11.8978	12.7314	12.8525	12.6922	0.638833	0.0397642
ZNF75A	TC1600006685.hg.1	6.35065	6.45065	6.23932	7.36366	6.95606	6.76392	0.681004	0.0489749
RACGAP1	TC1200010650.hg.1	11.8158	11.7223	11.8526	12.1651	12.234	12.0831	0.363813	0.00353111
HIST1H3B	TC0600011124.hg.1	14.813	15.22	15.0846	15.4554	15.879	15.5376	0.584793	0.0298354
ZNF281	TC0100016887.hg.1	6.59775	7.0659	7.13031	7.58082	7.33245	7.84473	0.654682	0.0437883
NOL8	TC0900010792.hg.1	7.39641	7.06936	6.83568	7.70417	7.85095	7.74475	0.666141	0.0466106
N4BP2	TC0400007306.hg.1	6.68299	6.57389	6.54463	6.94881	7.4338	7.34025	0.640451	0.0412329
HIST1H2AK	TC0600011228.hg.1	9.24426	8.99711	8.99719	9.41275	9.67621	9.56604	0.472148	0.0138281
INCENP	TC1100007833.hg.1	10.1078	10.4437	10.6455	11.0145	11.1483	10.9376	0.63444	0.0417341
USP41	TC2200008036.hg.1	7.68036	7.29527	7.83826	7.99348	8.24368	8.48973	0.637667	0.042431
CCK	TC0300010840.hg.1	5.06485	5.3975	5.57928	6.0049	6.04075	5.95674	0.653583	0.0460355
EVI2A	TC1700010314.hg.1	2.85377	2.541	2.82275	3.33075	3.28988	3.25439	0.552503	0.0262861
GOLGA2P5	TC1200011675.hg.1	4.40552	4.43842	4.07951	4.80228	4.73498	4.98675	0.53352	0.0232252
UBA3	TC0300011452.hg.1	11.5222	11.4572	11.4278	11.8938	12.294	11.992	0.590837	0.0335314
GSTCD	TC0400008329.hg.1	10.5846	10.36	10.6883	11.0374	10.8999	11.2256	0.509973	0.0196338
CCNG1	TC0500009319.hg.1	10.207	10.321	10.5243	10.8976	10.7438	10.8923	0.493763	0.0173562
SPRTN	TC0100011963.hg.1	8.56876	8.69499	8.91749	9.13675	9.33392	9.24559	0.511674	0.020027
YWHAZ	TC0800012446.hg.1	15.0351	14.7588	15.0433	15.5232	15.4758	15.4449	0.53554	0.0238563
ZNF280B	TC2200008134.hg.1	7.74991	8.28196	8.16998	8.46783	8.74062	8.8609	0.6225	0.0404666
TESPA1	TC1200010850.hg.1	10.0997	10.1391	9.68258	10.4402	10.5588	10.7134	0.59702	0.0353488
SNX25	TC0400009519.hg.1	5.90942	5.59124	5.66461	6.12519	6.34362	6.17117	0.491568	0.0174446
GAN	TC1600008580.hg.1	8.34734	7.84132	8.03017	8.41939	8.74289	8.91295	0.618802	0.0402431
CDCA8	TC0100007841.hg.1	10.2625	10.3707	10.6708	11.113	10.9156	10.931	0.551873	0.027732
ZBTB6	TC0900011453.hg.1	3.93008	3.7667	3.84598	4.54829	4.17636	4.43201	0.537967	0.0253007
RNF130	TC0500013429.hg.1	8.56663	8.53688	8.25294	9.25507	8.76815	9.08151	0.58276	0.0337852
WDR48	TC0300007083.hg.1	7.8758	8.33004	7.8543	8.57118	8.60246	8.7622	0.625231	0.0426085
KIAA1841	TC0200016454.hg.1	5.8165	5.46591	5.4447	6.19919	5.96742	6.18272	0.540741	0.0262502
KMT2A	TC1100009207.hg.1	8.79308	8.40788	8.24605	8.99931	9.00581	9.29477	0.617628	0.0414088
XRCC5	TC0200010729.hg.1	7.73182	7.56619	7.98315	8.37863	8.36769	8.29037	0.585177	0.0347782
PPFIBP2	TC1100006760.hg.1	3.13053	3.24877	3.51511	3.97533	3.87243	3.64267	0.532011	0.0248788
AMD1	TC0600009127.hg.1	10.7337	10.1845	10.5627	11.2012	11.0301	11.1767	0.642397	0.0469423
NDUFS1	TC0200015512.hg.1	9.30613	9.26567	9.50416	9.86746	9.79092	9.84644	0.476287	0.0162647
PTPDC1	TC0900008010.hg.1	6.79153	6.74654	6.50896	7.26124	6.99284	7.24112	0.48272	0.0171983
CD109	TC0600008539.hg.1	5.73871	5.66825	5.46491	6.15379	6.22334	5.93107	0.478776	0.0166329
SACM1L	TC0300007242.hg.1	9.89448	9.80931	9.71127	10.3042	10.5679	10.1737	0.543618	0.0271457
METTL5	TC0200014870.hg.1	11.8221	11.4562	11.5305	12.2727	12.3111	11.9091	0.5614	0.0306449
CAST	TC0500013204.hg.1	7.76308	7.63929	7.75892	8.13069	8.13392	8.10773	0.403683	0.00794059
ZNF19	TC1600011562.hg.1	10.9584	11.1778	11.0581	11.6303	11.4228	11.9109	0.589897	0.0365443
RAD21	TC0800011565.hg.1	12.5115	12.461	12.4531	13.0596	12.8691	13.3135	0.605507	0.0399839
ACTA1	TC0100017663.hg.1	8.56976	8.64508	9.04319	9.40661	9.39167	9.38608	0.642114	0.0483174
HIST1H4L	TC0600011234.hg.1	8.61893	8.70736	8.9125	9.28852	9.25014	9.17378	0.491218	0.0191377
AHCYL1	TC0100009365.hg.1	12.4886	12.2241	12.4822	12.9482	12.8942	12.7453	0.464257	0.0153093
CANX	TC0500009700.hg.1	13.7193	13.7896	13.8559	14.0896	14.2233	14.3231	0.423693	0.0102898
TRAF5	TC0100011487.hg.1	6.28565	6.19286	6.65619	7.02013	6.78813	7.0515	0.575014	0.0349979
PBX1	TC0100010430.hg.1	9.04376	8.92547	9.03076	9.42249	9.78684	9.45768	0.555677	0.0312146
LSG1	TC0300013609.hg.1	10.6937	10.379	10.8604	11.1654	11.3582	11.1596	0.58335	0.03681
ZNF451	TC0600008348.hg.1	10.0226	9.73209	9.4823	10.2606	10.4969	10.3056	0.608705	0.042335
CCNB2	TC1500007392.hg.1	11.5032	11.0003	11.4927	12.1188	12.0072	11.72	0.616607	0.0444111
SIKE1	TC0100015355.hg.1	9.89081	10.1887	9.89235	10.5003	10.8368	10.3559	0.573706	0.0352781
MED21	TC1200012613.hg.1	2.80016	2.80126	3.1481	3.29435	3.56648	3.45538	0.522225	0.0254168
PKN2	TC0100008955.hg.1	9.02785	9.04277	9.10256	9.78019	9.83488	9.39655	0.612811	0.0438116
PCNXL4	TC1400010612.hg.1	9.73962	9.36933	9.21875	9.87266	9.94987	10.3771	0.623964	0.0472704
NUP205	TC0700009253.hg.1	6.68232	6.41559	6.17489	7.20993	6.88506	6.91418	0.578793	0.0373769
HSPA9	TC0500012182.hg.1	13.3626	13.7221	13.6497	14.059	14.3232	13.9435	0.530437	0.0278932
PPIG	TC0200009911.hg.1	7.59416	7.67172	8.01636	8.1951	8.3088	8.43394	0.551867	0.0321226
NKAIN2	TC0600009343.hg.1	5.37974	5.2828	4.86538	5.51146	5.94444	5.89707	0.608349	0.0447081
FAM210A	TC1800008162.hg.1	7.94999	8.0312	8.26481	8.46332	8.53268	8.67255	0.474184	0.0185948
RFC3	TC1300006847.hg.1	11.5994	11.1275	11.5968	11.8164	12.1678	12.1228	0.594457	0.0419286
NAA50	TC0300012029.hg.1	13.1979	12.9602	13.031	13.7236	13.5777	13.3662	0.4928	0.0218165
WIPI1	TC1700011561.hg.1	8.18507	8.00434	8.10272	8.4634	8.75639	8.49438	0.474012	0.0190936
BHMG1	TC1900008345.hg.1	3.19703	3.719	3.55447	4.02231	4.20953	4.05522	0.605524	0.0454241
DENR	TC1200009217.hg.1	11.5992	11.9759	11.9168	12.258	12.2532	12.5488	0.522697	0.027888
ZNF485	TC1000007427.hg.1	6.33827	6.77017	6.83177	7.41368	7.19569	7.09762	0.588928	0.0417865
WHSC1	TC0400006546.hg.1	11.5899	11.5675	11.7114	12.0406	11.9985	12.0104	0.393563	0.00864976
BEX2	TC0X00010409.hg.1	6.68937	6.6818	6.76603	7.03242	7.27276	7.32081	0.496266	0.02314
ARL17B	TC1700010914.hg.1	10.3034	10.5438	10.3419	11.036	10.7226	10.8303	0.466653	0.0183307
NCKAP1L	TC1200007767.hg.1	10.9502	10.8789	11.1092	11.2755	11.4218	11.5336	0.430907	0.0132678
MTRNR2L8	TC1100010087.hg.1	17.1671	17.2825	17.6479	17.7461	17.9259	18.1455	0.573293	0.0388841
EIF5	TC1400008395.hg.1	14.4074	14.566	14.5181	15.2042	15.2208	14.8013	0.578267	0.0403149
FTSJ3	TC1700011423.hg.1	6.00013	5.86206	6.18678	6.33572	6.85917	6.5906	0.578837	0.0405343
C22orf31	TC2200008383.hg.1	2.91283	3.193	2.77184	3.4978	3.72287	3.30302	0.548676	0.0340077
LTV1	TC0600014189.hg.1	7.00575	6.73989	6.99328	7.23528	7.46436	7.72502	0.561917	0.0368448
SUCLA2	TC1300008873.hg.1	8.44526	8.42756	8.41043	8.76292	8.99269	8.92992	0.467424	0.0190685
ZNF107	TC0700013370.hg.1	9.25148	9.25015	8.84392	9.46517	9.96553	9.66992	0.58502	0.0424651
GRPEL2	TC0500009059.hg.1	10.4367	10.2536	10.2767	10.735	10.6701	10.9863	0.474783	0.0204204
DECR1	TC0800008184.hg.1	11.6544	11.6442	11.7773	12.2774	12.184	11.9887	0.458093	0.0177629
LRRC8D	TC0100018247.hg.1	9.25141	9.38919	9.45908	9.83183	9.80674	9.79268	0.443857	0.015773
IPO5	TC1300007791.hg.1	10.5302	10.3632	10.5501	10.9605	11.0015	10.7561	0.4249	0.0131499
HEATR5B	TC0200012256.hg.1	6.61031	6.74007	6.75368	7.31269	7.12194	7.02485	0.451806	0.0172065
TRRAP	TC0700013413.hg.1	7.87387	8.09256	8.18769	8.50238	8.38705	8.67052	0.46861	0.0200289
RRP12	TC1000011549.hg.1	3.38991	3.62493	3.22097	3.9046	4.0976	3.77734	0.514576	0.0284657
ZNF430	TC1900007508.hg.1	9.52546	9.58664	9.91561	10.2109	10.0668	10.3105	0.520147	0.0301899
NUP35	TC0200016578.hg.1	8.64525	8.89287	8.68616	9.08672	9.20643	9.22208	0.430318	0.014637
S100Z	TC0500007836.hg.1	3.62566	3.94983	3.81438	4.31405	4.34236	4.1192	0.461913	0.0197191
AMHR2	TC1200007714.hg.1	3.02274	2.79572	2.83555	3.16604	3.4504	3.36545	0.442628	0.0166629
MDM4	TC0100018339.hg.1	11.8042	11.3585	11.4497	12.1633	11.9015	12.1798	0.544057	0.0358153
ZNF844	TC1900007061.hg.1	5.91687	5.79865	6.20195	6.24208	6.69777	6.75942	0.593932	0.0473702
ALDH3A1	TC1700010036.hg.1	3.51369	3.61703	3.31582	4.00594	3.93593	3.98534	0.493559	0.0254872
URI1	TC1900007695.hg.1	11.0292	10.7869	10.543	11.396	11.428	11.2213	0.562087	0.0399461
DPY30	TC0200016647.hg.1	10.3824	10.739	10.6651	11.1102	11.2525	10.9223	0.499467	0.0267146
NSL1	TC0100017260.hg.1	10.9402	11.2257	10.9421	11.5096	11.6107	11.3745	0.46226	0.0201334
TMX1	TC1400007139.hg.1	12.6019	12.53	12.5977	12.8841	12.801	12.8654	0.27362	0.00137337
KLHDC8A	TC0100017066.hg.1	2.91433	2.67809	3.215	3.64092	3.63948	3.27157	0.581519	0.0453715
PKP4	TC0200009756.hg.1	9.18265	9.37544	9.36314	9.94864	9.93799	9.5855	0.516965	0.0308525
MED13	TC1700011369.hg.1	10.5196	10.6934	10.3864	11.1355	10.8102	11.1197	0.48869	0.0253375
CECR1	TC2200007894.hg.1	6.16524	5.77108	5.88092	6.77611	6.22429	6.58008	0.587748	0.047279
KCNK7	TC1100011240.hg.1	3.89772	3.60738	3.87545	4.2767	4.38293	4.10731	0.462126	0.0206611
PCNT	TC2100007465.hg.1	8.50344	8.44204	8.70326	8.95662	8.924	9.06564	0.432503	0.0159516
LIN7C	TC1100010405.hg.1	9.30638	8.99142	9.17835	9.47786	9.6942	9.66185	0.452591	0.0192484
G3BP2	TC0400012931.hg.1	12.4203	12.3404	12.5294	12.7104	12.9745	13.0415	0.47876	0.023888
PANX1	TC1100008797.hg.1	9.1669	9.37814	9.56867	9.82362	9.96725	9.90009	0.525747	0.033663
H1F0	TC2200007318.hg.1	14.3571	14.2643	14.4462	14.6225	14.8417	14.7765	0.391047	0.0104744
FAM199X	TC0X00008028.hg.1	6.98261	7.27519	7.2584	7.61145	7.53654	7.74658	0.459457	0.0207674
FCF1	TC1400007688.hg.1	8.93199	8.83749	8.7025	9.14041	9.18846	9.33099	0.395961	0.0113102
DSN1	TC2000009016.hg.1	10.5882	11.0882	10.7718	11.521	11.2307	11.3674	0.556977	0.0415737
PEX16	TC1100010686.hg.1	7.22144	7.61991	7.54751	8.25666	7.86864	7.88218	0.539541	0.037897
TNR	TC0100018534.hg.1	3.83778	3.80713	3.88558	4.13697	4.06184	4.12384	0.264054	0.00125277
PSMD14	TC0200009813.hg.1	8.99386	9.2806	9.2262	9.55358	9.5287	9.74373	0.441784	0.0185528
RPL6	TC1200011971.hg.1	14.482	14.3843	14.5317	14.7834	15.2705	15.0558	0.57057	0.0458368
BORA	TC1300007483.hg.1	6.77248	6.47496	6.70744	7.46782	7.09365	7.01699	0.541199	0.0388646
GNB4	TC0300013264.hg.1	7.80876	7.57146	7.61424	8.07967	7.964	8.23855	0.429252	0.0167173
NUP153	TC0600010948.hg.1	12.6772	12.3943	12.6762	13.0217	12.9272	13.3286	0.50993	0.0320157
GPC6	TC1300007718.hg.1	5.83724	6.2913	5.79061	6.47608	6.49461	6.70176	0.58444	0.0496647
ECHDC1	TC0600013115.hg.1	9.3631	8.90075	8.94313	9.53407	9.70403	9.68899	0.57337	0.0469043
C19orf67	TC1900009804.hg.1	3.41608	2.99232	3.40348	3.57986	4.11759	3.86519	0.583587	0.0495753
ADNP2	TC1800007835.hg.1	9.57818	9.75747	9.74633	10.0261	10.1988	10.4835	0.542141	0.0394194
NFX1	TC0900006970.hg.1	10.1359	10.067	9.8286	10.6237	10.4873	10.3135	0.464316	0.02301
MMAA	TC0400008912.hg.1	7.41737	7.71413	7.20073	7.96662	8.1213	7.97977	0.578488	0.0486275
INHBE	TC1200007881.hg.1	3.83079	4.18813	4.17761	4.60298	4.6464	4.58077	0.544544	0.040337
SMPDL3A	TC0600009333.hg.1	3.42137	3.08808	3.24765	3.89374	3.75174	3.54902	0.479133	0.0260747
SRP14	TC1500009079.hg.1	13.3935	13.4796	13.3543	13.709	13.7276	13.8863	0.365153	0.00842496
TUBGCP4	TC1500007057.hg.1	9.37975	9.76803	9.61691	10.1176	9.97091	10.1656	0.49646	0.0298722
BRCC3	TC0X00011334.hg.1	6.73054	7.04069	6.78105	7.33332	7.15405	7.5072	0.480764	0.0266374
NUDC	TC0100007489.hg.1	9.2279	9.24508	9.60458	9.84373	10.1042	9.70521	0.525205	0.0364463
RBM25	TC1400007625.hg.1	6.4814	6.05872	6.41375	6.88291	7.04024	6.63709	0.535457	0.038866
GDI2	TC1000009684.hg.1	13.2483	13.0375	13.3105	13.6252	13.6458	13.7076	0.460753	0.0230714
OXER1	TC0200012382.hg.1	4.73205	5.18455	4.8207	5.32156	5.47291	5.56467	0.540608	0.040576
MFSD14C	TC0900012258.hg.1	9.58199	9.68756	9.92595	10.1853	10.5693	10.0903	0.549806	0.0428894
RPL11	TC0100007326.hg.1	15.4704	15.5701	15.8945	16.2226	16.3408	15.9552	0.527873	0.0376454
NEGR1	TC0100014585.hg.1	4.32306	4.29368	4.57979	4.68098	4.93618	4.94303	0.454556	0.0222919
RNF141	TC1100010089.hg.1	10.0842	9.84822	10.2088	10.4824	10.628	10.4911	0.486794	0.028782
PRPF18	TC1000012429.hg.1	6.91045	6.73448	7.08455	7.32026	7.27455	7.65402	0.506449	0.0331251
NCK1	TC0300013878.hg.1	9.37332	8.88728	9.22798	9.96088	9.69922	9.50625	0.559261	0.0461215
HOXA10	TC0700010564.hg.1	3.70775	3.44517	3.31808	3.8205	4.00511	4.11763	0.490749	0.0301574
BNIP3L	TC0800007080.hg.1	14.0918	13.5883	13.8074	14.2407	14.6923	14.2722	0.572577	0.049852
NFYA	TC0600014123.hg.1	8.91444	8.62401	8.69156	9.14501	9.60839	9.15369	0.559024	0.0464854
TTLL1	TC2200008898.hg.1	6.67122	6.93473	6.97407	7.51617	7.20936	7.25666	0.467384	0.0255669
USP12	TC1300008424.hg.1	8.37499	8.07497	7.8666	8.79768	8.45643	8.70859	0.548714	0.0440315
NCAPD3	TC1100012917.hg.1	10.5984	10.59	10.768	10.9889	11.4884	11.1602	0.56037	0.0472765
ASGR2	TC1700009613.hg.1	3.1963	2.83099	3.14042	3.48824	3.63864	3.55688	0.50535	0.0339607
CCL16	TC1700010454.hg.1	3.66889	3.39037	3.91808	4.34448	4.23377	4.08016	0.560358	0.0473856
MLLT10	TC1000006975.hg.1	8.99286	8.57034	8.89376	9.30482	9.39467	9.39656	0.546366	0.0440181
RLF	TC0100007943.hg.1	7.39518	7.49303	7.30102	7.68185	7.74673	7.82875	0.356037	0.00831669
PARD3	TC1000010292.hg.1	7.68926	7.74718	8.02863	8.28112	8.16217	8.42332	0.467176	0.0263793
ZNF195	TC1100009840.hg.1	9.68969	9.30476	9.50534	9.83679	9.95091	10.2203	0.502726	0.0341465
RNF20	TC0900008257.hg.1	7.35454	7.59963	7.30742	7.91724	7.91152	7.91292	0.49336	0.032052
TAS2R19	TC1200009928.hg.1	2.85713	2.6489	2.76926	3.19168	3.10583	3.51551	0.512576	0.0365742
HSF4	TC1600008146.hg.1	7.36777	7.3979	7.82592	8.28143	7.88464	8.0747	0.549726	0.0457945
SPAST	TC0200007174.hg.1	8.51527	8.31252	8.29049	8.71368	8.71707	8.96637	0.426277	0.0187814
SDAD1	TC0400012934.hg.1	7.35251	7.62767	7.62975	8.10366	8.07179	7.80981	0.458445	0.0248706
PAX7	TC0100007147.hg.1	3.83424	4.02565	3.69342	4.30541	4.40469	4.19186	0.449549	0.0232062
NPPB	TC0100012898.hg.1	3.93275	3.97731	4.04087	4.23911	4.42727	4.36998	0.361813	0.00952699
MAPK14	TC0600007825.hg.1	10.4687	10.3775	10.6521	10.8108	10.9991	10.9312	0.414277	0.0172685
EXOC8	TC0100017729.hg.1	6.57419	6.53853	6.64435	7.21767	7.23924	6.87138	0.523741	0.0406864
ZKSCAN5	TC0700008498.hg.1	7.31938	6.82387	7.11511	7.70701	7.74406	7.41409	0.535599	0.0442988
TNRC6A	TC1600007262.hg.1	8.58669	8.3369	8.53276	8.7469	9.23067	9.08915	0.536787	0.0447752
THEG5	TC1900007732.hg.1	3.33754	2.9242	3.05516	3.5823	3.74147	3.47738	0.49475	0.03463
APPL2	TC1200011773.hg.1	6.33558	5.91626	6.18344	6.39607	6.82006	6.87739	0.552747	0.0496305
RAB1A	TC0200012854.hg.1	10.9742	11.2527	11.1845	11.4093	11.7803	11.6274	0.4685	0.0289881
HIST1H2AJ	TC0600011225.hg.1	17.0669	17.1404	17.3728	17.6072	17.7186	17.6276	0.457753	0.026733
TNFRSF8	TC0100006880.hg.1	5.04509	4.90615	4.777	5.43616	5.54304	5.16839	0.473112	0.03031
HNRNPH3	TC1000007852.hg.1	12.0274	12.3214	12.3941	12.6981	12.8207	12.7159	0.497247	0.0360967
CD46	TC0100011419.hg.1	9.01673	9.04768	8.9891	9.31527	9.62977	9.72955	0.540358	0.0471543
CDC42SE2	TC0500013226.hg.1	10.9372	10.9055	10.8297	11.3677	11.4159	11.1607	0.423977	0.0204887
SPECC1L	TC2200009232.hg.1	9.53926	9.59609	9.25554	9.88473	10.1632	9.79812	0.485054	0.0335338
EBLN2	TC0300007842.hg.1	5.99165	5.73773	6.01694	6.26662	6.27102	6.51563	0.435653	0.0231919
YWHAB	TC2000007473.hg.1	12.7279	12.6879	12.9894	13.2284	13.3405	13.1634	0.442353	0.024577
NUPL2	TC0700006910.hg.1	11.2196	11.2654	11.5676	11.6788	11.8738	11.8995	0.46646	0.0299074
FBXO36	TC0200011014.hg.1	7.97392	7.94635	8.01353	8.25949	8.36301	8.45524	0.381311	0.0136871
STX7	TC0600013193.hg.1	7.07679	6.85349	7.22848	7.52052	7.41955	7.62365	0.468321	0.0309718
CLK4	TC0500013020.hg.1	6.95937	6.91615	7.34227	7.65498	7.73871	7.37714	0.517684	0.0432518
SMARCC1	TC0300010990.hg.1	12.3995	12.0038	12.4808	12.6968	12.8792	12.9239	0.538613	0.0490854
TCP1	TC0600013762.hg.1	13.5572	13.3883	13.6579	13.8271	14.0922	13.9257	0.413897	0.0199231
HDAC2	TC0600012927.hg.1	11.2024	11.5415	11.4352	11.8203	11.961	11.7344	0.445527	0.0265107
BICD1	TC1200007262.hg.1	7.90407	8.19201	7.68157	8.56233	8.53734	8.27308	0.531699	0.0478146
CACNB2	TC1000006917.hg.1	3.50283	3.30488	3.62588	3.91221	3.94509	3.984	0.469236	0.0324006
FBXO45	TC0300010026.hg.1	6.6131	6.32527	6.77209	7.17525	7.0747	7.02475	0.521409	0.0457516
EXOG	TC0300007078.hg.1	9.2795	9.31357	9.32981	9.72659	9.84921	9.60962	0.420846	0.0219654
RC3H1	TC0100016447.hg.1	8.17146	8.37078	8.12078	8.7771	8.48433	8.98162	0.526676	0.0475137
OSTF1	TC0900007604.hg.1	10.7903	10.6374	10.6616	11.2081	11.0428	10.9734	0.378353	0.0144519
ZNF503	TC1000011081.hg.1	4.74277	4.45634	4.55088	4.85307	5.03384	5.1258	0.420905	0.0224498
FOXO6	TC0100007991.hg.1	4.12102	4.57208	4.27625	4.76094	4.68773	5.04664	0.508654	0.0432984
RHCG	TC1500010390.hg.1	3.2797	3.32578	3.19993	3.65807	3.68264	3.50301	0.346105	0.00999954
NUP88	TC1700012340.hg.1	9.38095	9.58047	9.81966	9.98154	10.2405	10.0322	0.491068	0.039347
ARHGEF3	TC0300011259.hg.1	3.79431	3.67863	3.62413	4.15254	4.13041	3.93579	0.373887	0.0143791
FAM103A1	TC0600013898.hg.1	7.95164	8.26009	8.14178	8.44442	8.88421	8.53416	0.503088	0.0428701
SENP5	TC0300010035.hg.1	8.04121	8.35227	7.9813	8.7147	8.38811	8.72868	0.485567	0.0386535
C6orf163	TC0600008729.hg.1	3.80109	3.50957	3.83437	4.37648	4.11116	4.04481	0.462472	0.0329734
EBAG9	TC0800008550.hg.1	11.9361	11.7994	11.8062	12.09	12.3065	12.2224	0.359047	0.0123775
2015-09-01	TC0100014806.hg.1	12.4964	12.6202	12.7726	13.157	12.9619	12.967	0.39893	0.0192291
SRSF10	TC0100013311.hg.1	11.6666	11.3038	11.4339	11.9503	11.9511	11.987	0.4947	0.0414961
MYCL	TC0100013811.hg.1	3.9253	4.09158	4.03708	4.49693	4.26647	4.57531	0.42825	0.0259151
TTLL5	TC1400010630.hg.1	10.1596	10.1286	10.0591	10.5218	10.3544	10.4398	0.32293	0.00809531
TUBB8	TC1000009508.hg.1	6.26552	6.29935	6.35386	6.66892	7.03456	6.70829	0.497679	0.0444601
CEBPG	TC1900007777.hg.1	10.3463	10.4286	10.5792	10.8565	10.922	10.7028	0.375717	0.0163494
NCL	TC0200016018.hg.1	12.3079	12.6778	12.266	12.8762	12.8135	13.0437	0.493903	0.0437788
RSRC2	TC1200012240.hg.1	10.3585	9.90252	10.1983	10.8764	10.5704	10.5205	0.502651	0.0462415
PTBP3	TC0900011217.hg.1	13.6278	13.2533	13.2564	13.938	13.8836	13.848	0.510663	0.0491036
RSPRY1	TC1600007990.hg.1	10.4585	10.3035	10.2667	10.6592	10.7642	10.6405	0.345063	0.0115613
FUBP1	TC0100014660.hg.1	10.9635	10.9274	10.6828	11.1605	11.3656	11.2742	0.408893	0.0234217
TMEM216	TC1100007805.hg.1	7.7369	7.60778	7.73328	7.92127	8.01389	8.05088	0.302699	0.00633476
PRR11	TC1700012285.hg.1	12.2265	12.5984	12.2628	12.9095	12.8091	12.8564	0.49577	0.0456995
TCEAL8	TC0X00010406.hg.1	7.69895	8.03217	8.04661	8.37799	8.28349	8.4967	0.460148	0.0361231
BLOC1S6	TC1500010736.hg.1	10.2214	10.678	10.3376	10.7523	11.0708	10.9082	0.49807	0.0466452
AURKA	TC2000009550.hg.1	11.6492	11.8476	11.8149	12.1061	12.4888	12.1447	0.475937	0.0405995
FAM184B	TC0400010166.hg.1	4.60237	4.88161	4.46948	4.91618	5.37298	5.1765	0.504065	0.0488765
HIST3H2A	TC0100017617.hg.1	9.15993	9.30771	9.23247	9.55323	9.78176	9.54038	0.391754	0.020621
MAP4K4	TC0200008655.hg.1	9.91523	9.56909	9.97102	10.1443	10.5382	10.2497	0.492305	0.0462328
PSG6	TC1900011963.hg.1	3.00796	3.35693	3.16212	3.53671	3.5283	3.75696	0.431654	0.0300338
BTBD1	TC1500010256.hg.1	11.9923	11.8468	11.6646	12.1818	12.3767	12.2015	0.418773	0.027091
PRKCB	TC1600007240.hg.1	11.5252	11.5517	11.6601	11.8242	12.0967	12.157	0.44699	0.0345471
MAGEB18	TC0X00006835.hg.1	2.99008	2.90412	3.24297	3.60662	3.37432	3.4486	0.430789	0.0304941
LINC00649	TC2100006982.hg.1	10.3877	10.0993	10.301	10.5032	10.7497	10.7951	0.420057	0.0281596
HIST1H2AL	TC0600007380.hg.1	14.3626	14.4076	14.7591	15.0999	14.9734	14.8938	0.479287	0.0438222
ARMT1	TC0600009868.hg.1	9.48328	9.25167	9.36832	9.74911	10.0267	9.66374	0.445419	0.034608
CBX1	TC1700010979.hg.1	10.8976	10.8815	10.7569	11.0785	11.3348	11.2741	0.383777	0.0203604
MOBP	TC0300007106.hg.1	5.96621	5.91478	5.85297	6.55094	6.20276	6.33313	0.45096	0.036895
ARHGAP26	TC0500008941.hg.1	10.4342	9.99031	10.1361	10.5593	10.6907	10.77	0.486441	0.0470284
LURAP1	TC0100008146.hg.1	4.53514	4.55957	4.49848	5.21321	4.89964	4.89588	0.471845	0.0428701
WDR70	TC0500007179.hg.1	6.64238	6.83235	6.66018	7.04558	6.96774	7.17239	0.350266	0.0146145
PCBD2	TC0500013230.hg.1	8.75271	8.78085	9.13176	9.53177	9.16648	9.38692	0.473288	0.0439358
HIST2H2AA4	TC0100018482.hg.1	14.9427	14.8782	15.1858	15.3006	15.5228	15.4157	0.4108	0.0275624
SIRT1	TC1000007846.hg.1	10.0237	9.62384	9.74442	10.2009	10.3265	10.297	0.477439	0.0456025
TRAF3IP1	TC0200011282.hg.1	7.50959	7.63744	7.17774	7.88858	8.08509	7.81842	0.489104	0.0491461
FADD	TC1100008262.hg.1	7.451	7.3148	7.58042	7.90244	7.82031	7.79734	0.391289	0.0233524
BAIAP2L2	TC2200008680.hg.1	4.07549	3.75205	3.95749	4.50066	4.31217	4.22333	0.417044	0.0298138
INPP5D	TSUnmapped00000419.hg.1	4.58898	4.44382	4.73183	5.17495	4.80415	5.20596	0.473476	0.0454287
CASP3	TC0400012618.hg.1	9.55969	9.73103	9.66227	9.93407	10.022	9.95953	0.320868	0.0104421
DYNC1LI2	TC1600010596.hg.1	8.32558	8.41065	8.46091	8.97997	8.73027	8.70788	0.406992	0.027586
RNASE7	TC1400006548.hg.1	3.02968	2.9585	3.11876	3.38592	3.39485	3.38702	0.353619	0.0164747
CCDC106	TC1900011805.hg.1	6.67702	6.63187	7.05426	7.15585	7.45305	7.19493	0.480227	0.0486509
MANBAL	TC2000007281.hg.1	9.8041	9.50718	9.80555	10.1284	10.2037	10.124	0.446416	0.0387318
MID1IP1	TC0X00006977.hg.1	10.9807	10.9623	11.2201	11.4637	11.646	11.3103	0.419013	0.0315409
ADAM10	TC1500009574.hg.1	10.4883	10.1139	10.254	10.618	10.93	10.6466	0.446107	0.0396588
KRBA2	TC1700012355.hg.1	4.19674	4.04456	4.46363	4.81208	4.55917	4.70543	0.45725	0.0436105
ZNRF2	TC0700013343.hg.1	8.75004	8.87191	9.00918	9.34517	9.11238	9.29786	0.374759	0.0222338
SUGP2	TC1900010037.hg.1	7.6274	7.83677	7.88226	8.10464	8.12627	8.48208	0.455524	0.0436742
DCAF6	TC0100010518.hg.1	8.72742	8.57688	8.40567	8.98191	9.05095	8.93756	0.42015	0.0339613
TUBA1C	TC1200012624.hg.1	15.8771	15.8212	15.9868	16.3255	16.1671	16.5808	0.46274	0.046454
MIER3	TC0500010813.hg.1	6.90202	6.75812	6.71529	7.30068	7.00997	7.3416	0.425605	0.0356086
RPF2	TC0600009142.hg.1	10.2295	10.3293	10.09	10.5691	10.9355	10.5387	0.464863	0.0472721
HIST1H2BH	TC0600007290.hg.1	14.3198	14.4296	14.4999	14.7313	15.0928	14.7699	0.448257	0.042279
KPNA1	TC0300012189.hg.1	8.26321	8.12021	8.54431	8.88917	8.6118	8.7998	0.457679	0.045251
COG3	TC1300007070.hg.1	9.26809	9.18094	9.00559	9.38669	9.62641	9.82389	0.460793	0.0462996
ZNF208	TC1900010164.hg.1	9.08231	9.22959	9.17377	9.72616	9.71083	9.38609	0.445798	0.0425854
RBM15	TC0100009383.hg.1	10.781	10.8748	10.7781	11.0316	11.2285	11.1671	0.33108	0.0143217
LOC101928137	TC1200008195.hg.1	2.93953	3.09632	2.7492	3.35861	3.53429	3.18611	0.431319	0.0385292
SYN2	TC0300006618.hg.1	2.56234	2.9618	2.80214	3.18169	3.41135	3.07772	0.448161	0.0436453
WNT9B	TC1700006471.hg.1	16.1393	16.0077	16.019	16.3006	16.6594	16.4956	0.429897	0.0388672
RNASEH2B	TC1300007208.hg.1	13.9889	14.3827	14.3381	14.8167	14.7334	14.5229	0.454457	0.0464612
RAMP3	TC0700007416.hg.1	3.34744	3.24234	3.66379	4.05359	3.80665	3.76797	0.45821	0.04766
ZNF93	TC1900007458.hg.1	6.9479	7.05724	6.87716	7.21447	7.56677	7.35789	0.418947	0.035966
ZNF518A	TC1000008535.hg.1	6.66266	6.86076	6.43041	7.20669	7.03384	7.1048	0.463832	0.049639
KIAA2022	TC0X00010098.hg.1	3.50707	3.31182	3.25543	3.90459	3.63691	3.68653	0.384574	0.0267751
SNTB2	TC1600011420.hg.1	5.90759	5.73529	5.86509	6.40839	6.29764	6.06076	0.41961	0.0362449
TTC23	TC1500010613.hg.1	7.16644	7.0543	7.04519	7.34597	7.56564	7.39088	0.345516	0.0181437
RPL36A	TC0X00011308.hg.1	14.7553	14.836	14.8535	15.0779	15.3521	15.178	0.387753	0.0280897
CDK7	TC0500007668.hg.1	10.5288	10.218	10.4384	10.8199	10.8643	10.6895	0.396163	0.0305018
CBX3	TC0700006980.hg.1	12.5923	12.4095	12.5873	12.8616	13.0229	12.7742	0.356537	0.020799
PITPNC1	TC1700008690.hg.1	10.5418	10.621	10.8199	11.1687	11.1897	10.8714	0.41566	0.0367026
ZDHHC2	TC0800006864.hg.1	9.50139	9.27182	9.30765	9.71015	9.97162	9.63332	0.41141	0.0355119
WDR76	TC1500007077.hg.1	9.83831	10.0659	10.196	10.4541	10.4222	10.5314	0.435825	0.0429187
PACSIN3	TC1100010726.hg.1	5.56554	5.68371	5.70172	5.8753	5.96571	6.08179	0.323942	0.0144706
EPT1	TC0200007035.hg.1	8.81677	8.50312	8.6695	8.95993	9.07279	9.13176	0.391697	0.0301748
KCTD20	TC0600007836.hg.1	9.53639	9.45809	9.53001	9.79067	9.72617	9.70737	0.233238	0.00280304
LYSMD4	TC1500010941.hg.1	3.65812	3.53837	3.53721	3.83462	3.94317	4.13668	0.393588	0.0309065
TRPS1	TC0800011532.hg.1	2.79131	2.83206	2.45225	3.10011	3.24938	3.06906	0.447642	0.0474886
HIST1H2AI	TC0600007374.hg.1	16.1418	16.4887	16.3469	16.8193	16.8396	16.5605	0.413987	0.03803
SPG20	TC1300008614.hg.1	7.49915	7.43978	7.22576	7.90133	7.92235	7.59361	0.417529	0.0392292
BACH1	TC2100008490.hg.1	7.38282	7.47852	7.57604	7.84496	8.10585	7.74627	0.419902	0.0400894
CBR3	TC2100007037.hg.1	3.24437	3.22772	3.48476	3.56448	3.93517	3.71518	0.419324	0.0399637
TNFRSF18	TC0100012452.hg.1	5.09077	4.929	5.18759	5.68232	5.57222	5.27533	0.440837	0.0468587
CKS1B	TC0100010100.hg.1	10.8217	10.6448	10.5734	11.0496	11.1857	10.9146	0.36998	0.026449
TEX22	TC1400010702.hg.1	3.39198	3.3146	3.05273	3.7534	3.88126	3.46865	0.447999	0.0498991
SMIM15	TC0500010876.hg.1	8.70588	8.59415	8.49603	8.86923	9.00207	8.89026	0.32183	0.015564
FRMPD3-AS1	TC0X00010468.hg.1	2.49846	2.74525	2.48136	2.88799	2.95443	3.02512	0.380819	0.0303345
SRSF6	TC2000007430.hg.1	11.6776	11.8969	11.8492	12.0349	12.2482	12.1603	0.339917	0.0203398
PHTF2	TC0700008149.hg.1	6.80298	6.63593	6.63333	7.11677	6.98986	6.92422	0.319537	0.0159708
RALA	TC0700007271.hg.1	8.15499	8.02488	8.36661	8.472	8.65027	8.62251	0.399429	0.0367888
KIF21A	TC1200010407.hg.1	4.39302	4.12304	4.27877	4.64188	4.58449	4.68683	0.372789	0.0291205
HOXD11	TC0200016566.hg.1	3.74053	3.69943	3.58327	4.16833	3.87917	4.18771	0.40399	0.0383554
TM6SF1	TC1500008114.hg.1	10.1853	10.3245	10.4401	10.5314	10.7256	10.8358	0.380957	0.0315578
RBMX2	TC0X00008405.hg.1	12.1373	12.4284	12.2193	12.5408	12.7489	12.6133	0.372653	0.0292215
ZNF26	TC1200012735.hg.1	6.05923	5.98261	6.29164	6.70646	6.37643	6.4706	0.406674	0.0397461
BATF2	TC1100011197.hg.1	3.66701	3.62611	3.73175	3.937	3.93285	3.96311	0.26936	0.00813015
MBOAT1	TC0600010991.hg.1	10.4101	10.405	10.2366	10.5887	10.7457	10.6421	0.308283	0.0149326
MCM3AP-AS1	TC2100007460.hg.1	6.51251	6.71064	6.49483	6.90797	6.84459	7.20256	0.412377	0.0432023
CENPK	TC0500010928.hg.1	8.84642	9.19939	9.20715	9.64615	9.47622	9.41282	0.42741	0.0483371
GIT2	TC1200011891.hg.1	10.8028	10.9942	10.8686	11.1073	11.2256	11.248	0.305117	0.0144766
TCEANC2	TC0100008375.hg.1	7.27841	7.14415	7.35612	7.46896	7.64358	7.75802	0.363961	0.0288652
NCBP1	TC0900008156.hg.1	9.09035	9.3477	9.29677	9.55753	9.67292	9.59705	0.364228	0.0289986
TTC17	TC1100007366.hg.1	9.4912	9.36615	9.53698	9.81885	9.74754	9.70021	0.290755	0.0125488
IMMT	TC0200013308.hg.1	11.0016	10.8369	11.1299	11.21	11.4215	11.442	0.368387	0.0315872
RAB5A	TC0300006784.hg.1	12.7741	12.4615	12.7103	12.8908	13.1988	13.0372	0.393643	0.0394641
INSM2	TC1400006905.hg.1	3.01668	3.16017	3.14257	3.49679	3.46267	3.29836	0.312797	0.0174605
ATF6	TC0100010369.hg.1	9.8988	9.9174	9.92366	10.1499	10.3607	10.4774	0.416053	0.0483906
CBWD1	TC0900009346.hg.1	8.32367	8.08291	8.14374	8.7009	8.44232	8.48143	0.358105	0.0301428
TPM4	TC1900007260.hg.1	11.8353	11.9346	11.8802	12.2127	12.4259	12.1436	0.377343	0.0361274
HNRNPH1	TC0500013423.hg.1	13.8583	13.83	13.9507	14.083	14.4203	14.3478	0.404053	0.0460874
NBPF20	TC0100015580.hg.1	6.86847	6.5236	6.68511	7.02858	6.98701	7.21613	0.384846	0.0397759
SPHK1	TC1700008945.hg.1	2.5248	2.70384	2.63367	2.86207	2.97397	2.89559	0.28977	0.0138314
HPS3	TC0300009131.hg.1	11.4835	11.3799	11.5492	11.7615	11.8146	11.6817	0.281733	0.0123004
AEBP2	TC1200012599.hg.1	11.2215	11.1155	11.1266	11.6294	11.6631	11.3562	0.395047	0.0434854
TRAM1	TC0800010765.hg.1	13.9898	13.89	14.0266	14.2675	14.5328	14.2444	0.379413	0.0383789
HK3	TC0500012956.hg.1	3.64809	3.86765	3.67713	4.03104	3.97185	4.20949	0.339839	0.026702
NTHL1	TC1600009085.hg.1	4.64212	4.41779	4.66902	4.8568	4.91258	5.00149	0.347314	0.0301517
LYRM9	TC1700012377.hg.1	3.05606	2.77694	2.99831	3.3148	3.32653	3.34938	0.386468	0.0434515
FUT10	TC0800012405.hg.1	8.67639	8.41995	8.4034	8.73978	9.01571	8.84605	0.367267	0.0375549
PTH1R	TC0300007273.hg.1	2.63784	2.76142	2.72303	2.91552	3.04803	3.17432	0.338525	0.0284494
NFIL3	TC0900010769.hg.1	12.9581	12.8498	12.8253	13.2337	13.3846	13.0884	0.357837	0.035172
CGB5	TC1900008516.hg.1	3.45527	3.6688	3.61937	3.78442	3.95263	4.11423	0.369281	0.0391091
APBB2	TC0400010519.hg.1	7.30169	7.62011	7.5212	7.8011	7.80366	7.94648	0.36941	0.0400698
RABEP2	TC1600009891.hg.1	6.22583	6.35523	6.10123	6.53135	6.68642	6.46336	0.33295	0.0283945
HIST1H4H	TC0600011145.hg.1	14.4627	14.3735	14.6932	14.7975	14.9724	14.8691	0.369843	0.040582
GRIN3B	TC1900006504.hg.1	3.14536	3.18083	3.17003	3.54508	3.61835	3.38412	0.350441	0.0342992
PDLIM5	TC0400008175.hg.1	8.8551	9.19471	8.90893	9.2541	9.48443	9.37259	0.384127	0.0462143
IQSEC3	TC1200006438.hg.1	6.58276	6.64814	6.43936	6.80837	6.83425	7.07962	0.35066	0.0346666
MLH1	TC0300007033.hg.1	10.8459	10.8284	10.8856	11.0578	11.2203	11.1437	0.287303	0.0166557
METTL15	TC1100007139.hg.1	8.12246	7.87855	8.08983	8.52432	8.37094	8.24374	0.349388	0.0351981
CLEC4G	TC1900009492.hg.1	4.41413	4.51662	4.18644	4.64657	4.84337	4.73109	0.36795	0.0426616
KLK4	TC1900011226.hg.1	2.92063	2.94467	3.01609	3.26368	3.51651	3.22327	0.374025	0.0449146
FGF8	TC1000011657.hg.1	6.62491	6.51967	6.53261	6.73433	6.86571	6.81203	0.244963	0.00876189
ARHGAP19-SLIT1	TC1000012581.hg.1	11.9337	11.9893	11.9265	12.1478	12.2103	12.2979	0.26881	0.0134309
ARL2	TC1100013037.hg.1	11.3046	11.5185	11.3857	11.7951	11.6447	11.6691	0.300017	0.0210583
UBXN2B	TC0800007735.hg.1	8.70066	8.80726	8.54106	8.91005	9.02474	9.10354	0.329784	0.0301304
SLC4A8	TC1200007640.hg.1	7.15383	7.02956	7.0362	7.43285	7.25181	7.37359	0.279558	0.016101
PNPLA7	TC0900012068.hg.1	5.05552	5.19499	4.85072	5.42945	5.28018	5.50147	0.369956	0.0443816
TRIQK	TC0800011105.hg.1	7.19939	7.45374	7.27945	7.7084	7.60061	7.62518	0.333868	0.0318094
CHCHD7	TC0800007697.hg.1	9.14602	8.86384	9.11775	9.21939	9.51993	9.53133	0.381014	0.049598
CTNNB1	TC0300007136.hg.1	11.2681	11.2796	11.5553	11.7025	11.7379	11.793	0.376793	0.0480731
SYCP2L	TC0600014070.hg.1	7.37236	7.34501	7.16902	7.77424	7.4613	7.76657	0.371906	0.0474977
HSF2	TC0600009322.hg.1	9.88819	9.90714	10.031	10.1865	10.2412	10.225	0.275447	0.0163753
CNKSR1	TC0100007444.hg.1	2.84693	2.95382	2.62225	3.01676	3.23676	3.27057	0.367028	0.0457444
BTF3	TC0500007772.hg.1	14.9253	15.1145	15.0825	15.4284	15.2371	15.3413	0.29484	0.0216212
C7orf65	TC0700007467.hg.1	3.13515	2.89606	2.84318	3.38187	3.35467	3.18166	0.347937	0.0393708
ETF1	TC0500012179.hg.1	9.56807	9.56149	9.26895	9.83456	9.94639	9.70779	0.36341	0.0452332
IGBP1	TC0X00007529.hg.1	11.2767	11.3126	11.5336	11.64	11.7885	11.6925	0.332717	0.0341658
ITK	TC0500009210.hg.1	10.3009	10.2386	10.0999	10.4059	10.693	10.5458	0.335057	0.0350702
ORMDL1	TC0200015216.hg.1	9.80021	9.73881	9.93716	10.1642	10.1295	10.1044	0.30732	0.026625
ZFP91-CNTF	TC1100013007.hg.1	11.0219	10.9049	10.9711	11.2981	11.4106	11.1561	0.322287	0.0320885
HNRNPDL	TC0400011173.hg.1	13.0101	13.0545	13.2599	13.3801	13.5973	13.3522	0.335017	0.0373499
FAM20B	TC0100010761.hg.1	6.75271	6.54359	6.86481	7.15563	7.06515	7.00917	0.356283	0.0458718
NOXO1	TC1600009079.hg.1	2.54538	2.32318	2.43182	2.87538	2.61853	2.76228	0.318604	0.032497
PGM2	TC0400007243.hg.1	9.68989	9.37073	9.59441	9.92375	10.0012	9.77969	0.349878	0.0446038
YEATS4	TC1200008134.hg.1	12.2327	12.3564	12.4491	12.6794	12.6671	12.6078	0.305383	0.0287297
CARD16	TC1100013222.hg.1	5.34772	5.2768	5.16876	5.45038	5.65927	5.54707	0.287812	0.0233603
SUDS3	TC1200009076.hg.1	7.77714	7.77314	7.8195	8.02542	8.05058	7.95235	0.219523	0.00726503
GAL3ST2	TC0200011425.hg.1	4.58775	4.62899	4.78288	4.83052	5.07803	5.05439	0.321106	0.0348194
LTBP4	TC1900008114.hg.1	8.17947	8.01193	8.16396	8.4952	8.30205	8.40291	0.281596	0.0219316
PPP2R1B	TC1100012303.hg.1	10.5688	10.6088	10.5364	10.753	10.7443	10.8328	0.205367	0.00543071
PTCH1	TC0900010886.hg.1	8.39692	8.55016	8.3931	8.86765	8.60817	8.83924	0.324959	0.037129
EIF3L	TC2200009262.hg.1	14.3471	14.4038	14.3788	14.5799	14.5199	14.5449	0.171653	0.00202401
ARMC8	TC0300008940.hg.1	9.78238	9.66847	9.62205	9.90983	10.0145	9.91107	0.254168	0.0151944
PAFAH1B1	TC1700006556.hg.1	11.0343	10.8207	10.9423	11.2391	11.2451	11.2626	0.3165	0.034675
GCK	TC0700010913.hg.1	2.42132	2.55269	2.3658	2.7312	2.80003	2.63151	0.274309	0.0211974
PKMYT1	TC1600009156.hg.1	4.68499	4.71134	4.6379	4.84002	4.84518	4.8931	0.181351	0.0032328
HDAC5	TC1700010811.hg.1	6.19131	6.21447	6.22534	6.39571	6.49628	6.55435	0.271738	0.0236414
DCAF10	TC0900007167.hg.1	7.19775	7.10177	7.36136	7.61162	7.3778	7.65111	0.326547	0.0465764
C8orf37	TC0800011158.hg.1	4.72276	4.98424	4.99321	5.25838	5.28818	5.12957	0.325306	0.0464653
WDR53	TC0300013707.hg.1	9.14978	9.06206	9.02355	9.55812	9.25136	9.41364	0.329245	0.0492311
ESYT2	TC0700013291.hg.1	15.2406	15.1868	15.2513	15.4182	15.6919	15.541	0.32412	0.0474745
UBB	TC1700007014.hg.1	15.1089	15.1299	15.1503	15.2516	15.2838	15.298	0.1481	0.00134537
PCDHB1	TC0500008872.hg.1	2.93165	3.05741	2.80482	3.12718	3.40422	3.21238	0.316632	0.0454199
UBE2J2	TC0100012458.hg.1	8.43549	8.43208	8.4884	8.59935	8.70179	8.65701	0.200727	0.00777549
C10orf76	TC1000011662.hg.1	9.38471	9.14888	9.17594	9.57474	9.69833	9.40205	0.321858	0.0484407
PPM1G	TC0200012076.hg.1	13.0638	12.9855	13.1318	13.3915	13.3526	13.21	0.257667	0.0232163
RFC5	TC1200009065.hg.1	12.7971	12.721	12.7253	12.9313	12.9473	12.9632	0.19946	0.00830195
FZD6	TC0800008478.hg.1	8.94896	9.02039	8.89894	9.17481	9.2034	9.12211	0.210675	0.0107799
H2AFZ	TC0400011424.hg.1	13.6324	13.7122	13.92	14.0722	14.1872	13.9462	0.313673	0.049157
RPL12	TC0900011575.hg.1	16.8725	16.7969	16.94	17.0428	17.0772	17.1545	0.221723	0.0152345
MAG	TC1900007849.hg.1	4.87805	4.67284	4.76495	5.06244	5.06501	5.03856	0.283395	0.0388257
CDC123	TC1000006798.hg.1	13.5989	13.6978	13.8512	13.9565	14.0767	13.9745	0.286583	0.040628
CSNK2A3	TC1100010107.hg.1	8.94173	9.04897	9.07741	9.17709	9.29058	9.40878	0.269449	0.0354061
SH3KBP1	TC0X00009205.hg.1	11.4259	11.42	11.4388	11.7367	11.6995	11.5926	0.24803	0.0273459
LDOC1	TC0X00010989.hg.1	3.39748	3.15112	3.19588	3.61012	3.47777	3.51065	0.284689	0.0442899
SEC24B	TC0400008376.hg.1	8.10477	7.98971	8.1292	8.22795	8.40059	8.30119	0.235352	0.0243196
SNX4	TC0300012252.hg.1	7.61961	7.69782	7.83452	8.00948	7.99418	7.97969	0.277134	0.0453971
STMN1	TC0100013369.hg.1	14.9074	14.7694	14.861	15.0767	15.0887	14.9987	0.208773	0.0170295
ANKRD63	TC1500009090.hg.1	3.26186	3.30845	3.35206	3.4494	3.60773	3.51873	0.217833	0.0230846
PODXL	TC0700012636.hg.1	3.44765	3.34094	3.38478	3.75243	3.559	3.59389	0.243983	0.0356588
KLKB1	TC0400012875.hg.1	4.01959	3.85158	4.01176	4.16428	4.25133	4.17311	0.235265	0.0320164
SUPT16H	TC1400008628.hg.1	11.507	11.2846	11.3729	11.6756	11.6725	11.5695	0.251047	0.0404529
MYO6	TC0600008571.hg.1	2.63844	2.83618	2.86375	2.96692	3.04681	3.10453	0.259966	0.0463242
RFC2	TC0700011510.hg.1	10.7462	10.8133	10.9763	11.0028	11.1505	11.1433	0.253577	0.0444139
SLC27A4	TC0900008860.hg.1	8.21826	8.26023	8.28984	8.39118	8.47168	8.54404	0.212858	0.0248338
FLVCR1	TC0100011549.hg.1	7.87175	7.83083	7.8876	8.00692	8.14212	8.05686	0.205239	0.0218485
TBCK	TC0400011529.hg.1	3.86228	3.78951	3.79508	3.948	4.07932	4.15945	0.246634	0.0433966
ZFP91	TC1100013005.hg.1	10.7124	10.8746	10.654	10.9579	11.0551	10.9772	0.24974	0.0460148
VCPKMT	TC1400009122.hg.1	7.95824	8.00624	7.93531	8.15486	8.13688	8.31132	0.234422	0.0383306
NEIL3	TC0400009396.hg.1	13.6416	13.4633	13.6621	13.7337	13.8961	13.8586	0.240483	0.0427613
CCDC80	TC0300014031.hg.1	3.51508	3.49431	3.55387	3.65113	3.74383	3.67243	0.168045	0.0111755
KIAA1755	TC2000009060.hg.1	3.02575	3.10765	3.14986	3.3446	3.21667	3.42633	0.234778	0.0402826
DRG1	TC2200009260.hg.1	11.9699	11.7895	11.9301	12.1066	12.278	12.0518	0.248963	0.0489616
PDIA2	TC1600006453.hg.1	2.79092	2.71063	2.70593	2.85774	2.93165	2.91368	0.165195	0.010634
CEP104	TC0100012602.hg.1	11.4758	11.3973	11.4894	11.7326	11.5719	11.6894	0.210437	0.0283381
AKAP8	TC1900009866.hg.1	9.00581	8.83318	8.92131	9.05991	9.13567	9.24842	0.227904	0.0374492
FBL	TSUnmapped00000445.hg.1	13.9587	13.956	14.0483	14.1294	14.1936	14.1549	0.171617	0.013375
CLDND1	TC0300014020.hg.1	11.1987	11.0949	11.2108	11.281	11.429	11.3906	0.198743	0.0274963
RPL24	TC0300011860.hg.1	14.956	15.0016	15.1063	15.2571	15.2245	15.2047	0.207413	0.032171
KLHL28	TC1400010737.hg.1	6.45655	6.5515	6.63424	6.70876	6.79904	6.77054	0.212017	0.0350099
CCDC173	TC0200014860.hg.1	3.82156	3.75215	3.85926	4.16344	3.94103	4.03413	0.235213	0.0488358
DDX5	TC1700011449.hg.1	13.6089	13.5844	13.4821	13.7203	13.8282	13.7007	0.191223	0.0261471
GNPAT	TC0100011958.hg.1	10.0045	9.78577	9.89567	10.036	10.2067	10.1311	0.229268	0.0490633
TIAL1	TC1000012015.hg.1	9.175	9.25918	9.10458	9.30228	9.39045	9.50701	0.220327	0.0452061
UBASH3A	TC2100007254.hg.1	12.2912	12.3272	12.3623	12.5583	12.5051	12.4366	0.173123	0.0207949
TRIP11	TC1400010778.hg.1	5.383	5.44831	5.43088	5.73081	5.60211	5.55904	0.209924	0.0418555
EEF1A1	TC0600012296.hg.1	17.8434	17.7984	17.8393	17.9382	17.9813	18.0419	0.16008	0.0190272
ANAPC2	TC0900012039.hg.1	7.51109	7.6948	7.58164	7.75913	7.76729	7.86286	0.200582	0.0429367
DAO	TC1200008789.hg.1	3.11116	3.14322	3.10183	3.22766	3.33528	3.37296	0.193231	0.0385707
SEPHS2	TC1600009967.hg.1	7.79418	7.70745	7.86154	8.00444	8.04937	7.8906	0.19374	0.0408367
SYPL2	TC0100009352.hg.1	3.3064	3.39321	3.25829	3.44622	3.53239	3.49167	0.17079	0.0289428
NFATC3	TC1600011417.hg.1	12.6087	12.6166	12.6506	12.8082	12.7231	12.8213	0.158927	0.022624
HIST2H2BF	TC0100015696.hg.1	16.642	16.6577	16.7834	16.8619	16.8571	16.9129	0.182953	0.0404615
NAF1	TC0400012987.hg.1	9.49291	9.38422	9.40222	9.56285	9.59947	9.60336	0.162111	0.0281302
TPD52L2	TC2000008095.hg.1	9.46867	9.38643	9.54622	9.68556	9.62931	9.61264	0.175399	0.0444672
CEND1	TC1100009702.hg.1	4.43568	4.46246	4.39419	4.64742	4.51877	4.60139	0.15842	0.0331004
ZNF561	TC1900009590.hg.1	7.23664	7.11199	7.21514	7.31516	7.37075	7.36253	0.161559	0.0358684
TRIM46	TC0100010115.hg.1	5.01849	5.09685	5.10984	5.20847	5.18072	5.32191	0.161971	0.042821
FBL	TSUnmapped00000061.hg.1	13.7708	13.7692	13.766	13.9257	13.8639	13.8804	0.121337	0.0219096
ELOVL5	TC0600012072.hg.1	15.8694	15.9842	15.9387	16.0597	16.1113	16.0279	0.13554	0.0347416
EIF3C	TC1600009856.hg.1	14.6645	14.7053	14.7825	14.7975	14.8626	14.9236	0.143817	0.045898
RPS24	TC1000008159.hg.1	16.2422	16.3355	16.2883	16.4766	16.3526	16.4431	0.135423	0.0466989
KLF6	TC1000009612.hg.1	10.4396	10.3658	10.342	10.4484	10.5577	10.534	0.130887	0.0426143
DHFR	TC0500011280.hg.1	15.0768	15.0373	14.9817	15.124	15.2146	15.1204	0.12104	0.043619
H2AFB1	TC0X00008859.hg.1	5.00887	4.99355	5.04027	4.95162	4.90584	4.96035	-0.0749543	0.0280478
KCMF1	TC0200008233.hg.1	13.5987	13.5755	13.5269	13.4258	13.5087	13.4879	-0.0929133	0.0481431
SLC39A13	TC1100007482.hg.1	6.75491	6.77968	6.84698	6.71737	6.67352	6.61748	-0.124401	0.0357281
IL3RA	TC0X00006453.hg.1	3.19561	3.32275	3.31595	3.14797	3.03713	3.16515	-0.161356	0.0487273
MICALL2	TC0700010012.hg.1	8.08204	7.96515	8.06292	7.84884	7.85153	7.95488	-0.151619	0.0394222
ARF4	TC0300011273.hg.1	13.1023	13.0791	13.0986	12.8317	12.9635	12.9548	-0.176623	0.0498559
HMBS	TSUnmapped00000307.hg.1	9.60746	9.63559	9.75792	9.45188	9.55993	9.46441	-0.174916	0.0425474
EPHA4	TC0200015815.hg.1	3.66246	3.5167	3.67133	3.5136	3.37144	3.40843	-0.185676	0.0491249
FBXO6	TC0100006862.hg.1	5.65803	5.54783	5.59147	5.4404	5.43689	5.41623	-0.167939	0.0291083
HSBP1	TC1600008627.hg.1	8.77113	8.89601	8.80864	8.58628	8.7341	8.60163	-0.184593	0.0392964
PA2G4	TC1200012644.hg.1	16.6322	16.6671	16.6854	16.4902	16.4183	16.5503	-0.175283	0.0304405
CRACR2A	TC1200009649.hg.1	8.17244	8.06833	8.10564	7.9797	7.95067	7.93306	-0.160991	0.0203556
GNA15	TC1900006620.hg.1	10.861	10.9264	10.9986	10.7623	10.7007	10.7926	-0.17678	0.0264555
PRR16	TC0500008454.hg.1	2.65968	2.5616	2.64351	2.3584	2.52262	2.39651	-0.195752	0.0375367
TROAP	TC1200007559.hg.1	7.9538	8.03644	7.9909	7.82877	7.83648	7.85838	-0.1525	0.0147486
PRELID1	TC0500009614.hg.1	14.8092	14.927	14.9163	14.7118	14.7541	14.5756	-0.203687	0.0420847
REXO1L4P	TC0800011007.hg.1	4.01804	4.11552	4.0964	3.96435	3.85999	3.75727	-0.21611	0.0494901
MFSD2A	TC0100007936.hg.1	8.70224	8.84057	8.74489	8.6269	8.54678	8.56213	-0.183964	0.026301
SYS1	TC2000009923.hg.1	9.93679	9.97247	9.80778	9.73133	9.66042	9.70507	-0.206744	0.0387891
SMS	TC0X00006770.hg.1	12.739	12.7095	12.7662	12.5872	12.6398	12.6072	-0.126823	0.00488533
EEF2	TC1900009316.hg.1	17.6119	17.5785	17.5252	17.346	17.2666	17.4567	-0.215423	0.0423791
CH25H	TC1000011376.hg.1	3.17894	3.21949	3.19878	3.01251	3.07192	2.94453	-0.189418	0.026777
ENY2	TC0800008546.hg.1	11.2872	11.4167	11.3902	11.2118	11.1038	11.2156	-0.187627	0.0255368
HSH2D	TC1900011683.hg.1	6.45954	6.54762	6.51122	6.37003	6.37909	6.2988	-0.156821	0.0121241
MGAT4B	TC0500013064.hg.1	6.17983	6.0171	6.01087	5.93724	5.82545	5.78878	-0.218781	0.0392165
TCF25	TC1600011451.hg.1	11.5081	11.5669	11.655	11.3695	11.4449	11.2395	-0.22535	0.043064
AC009133.12	TC1600011515.hg.1	9.28888	9.17983	9.07243	8.953	8.88999	8.98214	-0.238667	0.0456372
OR13C2	TC0900011067.hg.1	4.20388	4.20583	4.26531	3.98147	3.94434	4.10414	-0.21502	0.0323734
HYOU1	TSUnmapped00000253.hg.1	12.7855	12.5899	12.6863	12.4043	12.4891	12.4841	-0.22805	0.038077
IFT140	TC1600009050.hg.1	6.97781	6.86902	6.95067	6.72995	6.7953	6.73859	-0.177891	0.0148989
CLCA1	TC0100008922.hg.1	4.87243	5.09293	4.99965	4.77218	4.65426	4.81334	-0.24174	0.0428316
TMEM158	TC0300010916.hg.1	4.21581	4.24848	4.24068	4.10554	4.01659	4.0606	-0.17408	0.0123856
PFDN2	TC0100016158.hg.1	8.39179	8.21127	8.34897	8.1177	8.00666	8.14883	-0.226282	0.0335768
RNF41	TC1200010901.hg.1	10.0422	10.1126	9.90064	9.7182	9.79236	9.80476	-0.246735	0.0420517
MED15	TC2200009194.hg.1	13.0888	13.077	13.0777	12.8424	12.9396	12.8484	-0.204353	0.0215172
IL3RA	TC0Y00006452.hg.1	3.23664	3.33731	3.45148	2.98643	3.07819	3.20085	-0.253323	0.0447805
APEX1	TC1400006519.hg.1	14.2847	14.1874	14.3503	14.1257	14.0018	14.0493	-0.215187	0.0251803
MTL5	TC1100011394.hg.1	4.60661	4.54888	4.59281	4.45204	4.32814	4.30877	-0.219787	0.0269275
ABHD17A	TC1900009192.hg.1	6.159	6.07905	6.112	5.94567	5.915	5.76448	-0.24163	0.0350176
KRTAP9-8	TC1700012258.hg.1	3.43128	3.42361	3.27838	3.11008	3.10752	3.23724	-0.226145	0.0270807
VDAC1	TC0500012059.hg.1	14.0227	13.7603	13.9061	13.5424	13.6746	13.6543	-0.272593	0.0491215
ZNF207	TC1700012230.hg.1	13.7586	13.6569	13.5029	13.3145	13.3302	13.4614	-0.270783	0.0463144
HOXD4	TC0200016569.hg.1	3.6889	3.64816	3.89656	3.37135	3.46322	3.56944	-0.276536	0.0492837
MSGN1	TC0200006835.hg.1	8.08706	8.02944	7.96118	7.75648	7.79032	7.89532	-0.21186	0.0193877
COL20A1	TC2000008056.hg.1	5.00103	4.92064	5.13773	4.75584	4.79941	4.71878	-0.261791	0.0409302
C1orf204	TC0100018513.hg.1	4.81129	4.81572	5.03124	4.53257	4.61173	4.70502	-0.269641	0.044109
CD6	TC1100007787.hg.1	12.5538	12.6736	12.7142	12.4981	12.408	12.2989	-0.245543	0.0321772
C1orf43	TC0100015902.hg.1	13.294	13.3764	13.485	13.0964	13.1184	13.2246	-0.238657	0.0289954
UBE2D1	TC1000007700.hg.1	11.6808	11.5869	11.5631	11.4323	11.2037	11.3891	-0.268543	0.0425722
GNAO1	TC1600007944.hg.1	12.7142	12.919	12.6973	12.5093	12.4408	12.5635	-0.272303	0.0432274
NUP37	TC1200011720.hg.1	10.6776	10.5742	10.4034	10.3676	10.222	10.2096	-0.285333	0.0488133
FOXO3	TC0600009059.hg.1	9.43462	9.31549	9.15403	9.00456	9.097	8.93523	-0.28912	0.0497401
BOP1	TC0800012202.hg.1	10.2203	10.1962	10.0065	9.80771	9.88077	9.92637	-0.269383	0.038615
PSD3	TC0800009764.hg.1	2.79592	2.89443	3.01503	2.62521	2.74197	2.5322	-0.268669	0.0376634
RPL39	TC0X00010648.hg.1	15.7746	15.6339	15.6347	15.4009	15.5354	15.2965	-0.270167	0.0383084
BFSP2	TC0300008856.hg.1	4.59962	4.69729	4.65785	4.2947	4.48506	4.42301	-0.250665	0.0288751
IP6K2	TC0300013975.hg.1	9.90907	10.1097	9.9115	9.78643	9.56096	9.73943	-0.281161	0.0423805
TEAD4	TC1200006515.hg.1	2.52103	2.52601	2.40994	2.34995	2.15392	2.15787	-0.265077	0.0342302
PREX1	TC2000009357.hg.1	3.06869	2.88398	2.86172	2.77557	2.61284	2.61764	-0.269446	0.035332
EXOC3	TC0500009803.hg.1	3.95555	3.95494	4.07141	3.73718	3.81709	3.55671	-0.290303	0.0445719
RABGGTA	TC1400008749.hg.1	10.1792	10.2607	10.0736	9.90669	9.88698	9.90469	-0.271723	0.0360167
HEATR9	TC1700010445.hg.1	3.84757	3.73359	3.72549	3.56722	3.6048	3.47702	-0.219207	0.01607
ELMO1	TC0700010760.hg.1	12.3339	12.6146	12.5506	12.1968	12.1171	12.2666	-0.306203	0.0495128
ADGRE5	TC1900007173.hg.1	10.3866	10.5163	10.5805	10.23	10.1861	10.2746	-0.264247	0.0282305
CTSL	TC0900007816.hg.1	3.86346	3.86251	3.79505	3.41708	3.66755	3.53478	-0.300534	0.0431072
SLC6A6	TC0300006677.hg.1	10.3552	10.6269	10.4112	10.0948	10.0478	10.3011	-0.31654	0.0497677
SNRNP70	TC1900008522.hg.1	12.0986	12.0944	12.2688	11.847	11.9492	11.8779	-0.262603	0.0266979
LOC388882	TC2200008169.hg.1	3.10088	3.35803	3.24168	2.96027	3.03237	2.824	-0.294651	0.0394586
FXN	TC0900007494.hg.1	9.40221	9.22951	9.4471	9.01213	9.0853	9.14411	-0.279093	0.0320386
ITGB6	TC0200016743.hg.1	3.99281	3.76468	3.75326	3.43349	3.48071	3.66826	-0.309429	0.0436036
CAPZB	TC0100013134.hg.1	13.8602	14.0652	13.9375	13.7451	13.5183	13.7199	-0.29322	0.0364141
GOLGA3	TC1200012875.hg.1	8.00031	8.27896	8.23266	7.78177	7.94238	7.83533	-0.31748	0.0460181
CDKN2AIPNL	TC0500012070.hg.1	12.1601	12.4289	12.2176	11.9001	12.0597	11.9197	-0.309063	0.0419975
TCEAL1	TC0X00011317.hg.1	9.76685	9.6974	9.54427	9.33644	9.40774	9.37558	-0.296249	0.0361468
FAM120A	TC0900007992.hg.1	11.7927	12.0077	11.7441	11.6669	11.4345	11.5016	-0.313843	0.0433132
DHTKD1	TC1000006794.hg.1	10.3485	10.4656	10.4306	10.0188	9.99692	10.2591	-0.323305	0.0457605
TUSC3	TC0800006837.hg.1	10.4288	10.2778	10.1929	10.1086	9.99258	9.92783	-0.290157	0.0318563
MRPS2	TC0900009164.hg.1	12.1843	12.4324	12.2724	12.1195	11.9696	11.8188	-0.32711	0.0462124
CLSTN1	TC0100012816.hg.1	11.1021	11.2041	10.957	10.9084	10.7634	10.5902	-0.333763	0.0490793
CASC3	TC1700007780.hg.1	13.474	13.7428	13.4844	13.3511	13.2131	13.1634	-0.32454	0.0446944
UROS	TC1000012162.hg.1	11.136	11.3251	11.1009	10.9885	10.908	10.741	-0.308187	0.0378406
MRPS18C	TC0400008004.hg.1	8.24212	8.41349	8.41063	8.02132	8.18074	7.85975	-0.334813	0.0473774
CYP27B1	TC1200012814.hg.1	4.04542	3.8378	3.83935	3.59808	3.41068	3.71774	-0.332024	0.0457062
FZD9	TC0700007977.hg.1	6.25662	6.25575	6.09959	5.96122	6.01007	5.84278	-0.265963	0.0210874
NPBWR2	TC2000009858.hg.1	3.01732	2.94261	2.92544	2.69299	2.4821	2.73815	-0.324043	0.041981
SPACA5B	TC0X00007170.hg.1	4.17066	3.85958	4.02264	3.58088	3.82544	3.63935	-0.335736	0.0466611
JMJD8	TC1600008971.hg.1	10.6866	10.7693	10.6014	10.4037	10.1581	10.4678	-0.3426	0.0485553
HADH	TC0400008348.hg.1	12.3604	12.4801	12.4573	12.2414	12.2345	12.1438	-0.226027	0.0100048
TGIF2-C20orf24	TC2000009916.hg.1	13.3656	13.3406	13.4198	13.1125	13.1219	12.8615	-0.343323	0.0480355
FCN1	TC0900011918.hg.1	4.74924	4.96047	4.89591	4.69848	4.53347	4.45965	-0.304675	0.0326126
OSBPL2	TC2000009953.hg.1	11.6554	11.795	11.489	11.3511	11.1804	11.4073	-0.333573	0.0438503
ZNF80	TC0300012047.hg.1	3.88736	3.89798	4.04755	3.54271	3.70364	3.73926	-0.282425	0.0247606
TOM1	TC2200007196.hg.1	8.42364	8.3502	8.59651	8.26038	8.14774	7.97457	-0.329222	0.041767
MINPP1	TC1000008351.hg.1	8.95035	9.04143	8.97333	8.58795	8.67904	8.8086	-0.296507	0.029086
VDAC2	TC1000008092.hg.1	15.6598	15.713	15.699	15.5479	15.5009	15.5328	-0.16337	0.00162341
SEL1L3	TC0400010282.hg.1	3.12242	3.01942	2.99685	2.72198	2.85381	2.55159	-0.337107	0.0444259
AAGAB	TC1500009845.hg.1	10.6501	10.7045	10.6873	10.3361	10.4354	10.4859	-0.261543	0.0177068
PSMC4	TSUnmapped00000597.hg.1	12.7086	12.6665	12.8572	12.5586	12.419	12.4248	-0.276643	0.0218444
PGM1	TC0100008591.hg.1	9.25199	9.04492	9.34047	8.9318	8.92736	8.77774	-0.333492	0.0416835
MDH2	TC0700008081.hg.1	14.0901	14.079	14.1815	13.9336	13.9051	13.8006	-0.237103	0.0113999
MAD2L1BP	TC0600008102.hg.1	9.96758	10.0507	10.1501	9.78782	9.84078	9.57516	-0.321544	0.0368553
PRKACA	TC1900009806.hg.1	10.6988	10.7113	10.8338	10.3395	10.5843	10.3764	-0.314553	0.033906
CDCA7L	TC0700010435.hg.1	12.7114	12.7155	12.8836	12.5716	12.2999	12.4785	-0.320163	0.0356523
GPI	TC1900011707.hg.1	14.0631	14.359	14.178	13.9767	13.8562	13.7724	-0.331583	0.0399729
C20orf24	TC2000009915.hg.1	13.2421	13.2253	13.4981	12.9686	13.0231	12.9239	-0.349967	0.0469871
CNOT11	TC0200008646.hg.1	11.4012	11.2631	11.3304	11.0878	11.1372	10.951	-0.272953	0.0197966
FAM155A	TC1300009731.hg.1	3.15839	3.19311	3.25847	2.99534	2.99452	2.95496	-0.221713	0.00789555
PRKD2	TC1900010998.hg.1	9.76966	9.78958	9.72593	9.5439	9.30405	9.46341	-0.324601	0.0366161
POLE3	TC0900011262.hg.1	10.3215	10.2435	10.0619	9.79474	10.0076	9.86535	-0.319739	0.0340315
INTS3	TC0100018298.hg.1	11.7623	11.6319	11.8776	11.3446	11.4267	11.564	-0.3122	0.0313577
SNUPN	TC1500010894.hg.1	9.17318	9.16885	9.13819	8.8155	8.96761	8.86496	-0.277384	0.0201365
ATP1A1	TC0100018273.hg.1	13.2367	13.4503	13.2989	13.0345	12.9463	13.1258	-0.29311	0.0247688
ALDOA	TC1600007440.hg.1	16.118	16.407	16.2694	15.9423	15.8681	15.9434	-0.34685	0.0437976
BCOR	TC0X00009427.hg.1	11.9053	12.1042	11.9994	11.8391	11.6	11.5921	-0.325883	0.035518
GTF2B	TC0100014846.hg.1	10.4163	10.339	10.26	10.1422	10.1031	10.0036	-0.255467	0.0141523
LYZL6	TC1700010452.hg.1	3.87475	3.82029	3.58332	3.34443	3.57586	3.29052	-0.355849	0.0467345
OR51B4	TC1100009924.hg.1	5.1734	5.05081	4.93321	4.78655	4.69845	4.72021	-0.317404	0.0318052
CHRNB3	TC0800007449.hg.1	2.91686	3.12053	2.92667	2.80782	2.61151	2.61402	-0.310236	0.0288436
FBXL12	TC1900009600.hg.1	9.33959	9.29569	9.51375	9.06865	9.02105	9.14873	-0.303534	0.0260983
BLOC1S1-RDH5	TC1200012642.hg.1	8.5529	8.36184	8.41133	8.25894	7.89965	8.05626	-0.370404	0.0499869
ATP6V1G2-DDX39B	TC0600014259.hg.1	13.9713	13.8315	13.844	13.7003	13.3759	13.4924	-0.359417	0.0450877
GADD45B	TC1900006588.hg.1	8.2495	8.56783	8.36352	8.17397	8.03873	7.8841	-0.361352	0.0453655
PDCD11	TC1000008770.hg.1	10.7294	10.8348	10.9937	10.5615	10.2713	10.603	-0.37403	0.0494841
SPCS1	TC0300007495.hg.1	13.5071	13.6402	13.5018	13.3025	13.1924	13.3491	-0.268367	0.0144301
SDC4	TC2000009218.hg.1	2.96737	3.05286	2.74792	2.5218	2.57347	2.53592	-0.378985	0.0493336
LPAR2	TC1900010073.hg.1	9.08526	8.95624	9.19345	8.53343	8.89064	8.68652	-0.374789	0.0470352
SSR4	TC0X00008798.hg.1	10.943	11.2159	11.2076	10.8905	10.7874	10.5566	-0.37732	0.0478452
DNMBP	TC1000011596.hg.1	10.0535	9.92718	9.80604	9.45988	9.75812	9.46846	-0.366739	0.0438146
PFDN6	TC0600007695.hg.1	11.5195	11.4746	11.5156	11.3041	11.1334	11.1675	-0.301537	0.0222245
POTEB3	TC15_KI270727v1_random00006441.hg.1	4.06548	3.86742	3.87834	3.58231	3.60702	3.627	-0.331642	0.0313964
CLEC3A	TC1600008504.hg.1	3.70594	3.76812	3.70849	3.50404	3.52867	3.53327	-0.205526	0.00369003
LSM12	TC1700010810.hg.1	14.7063	14.478	14.5565	14.3163	14.2953	14.1952	-0.311373	0.0247765
MTA2	TC1100011089.hg.1	12.4715	12.639	12.7188	12.2045	12.4279	12.1117	-0.361717	0.0413248
BCAP31	TC0X00011168.hg.1	11.9433	11.9216	12.1569	11.5877	11.8194	11.5965	-0.339407	0.0334975
SLC17A7	TC1900011139.hg.1	3.71353	4.01285	3.90649	3.42297	3.68304	3.43938	-0.362492	0.0406151
SAXO1	TC0900009643.hg.1	2.64579	2.85195	2.66933	2.22012	2.52566	2.36423	-0.352353	0.0366104
MBLAC1	TC0700008525.hg.1	4.88328	4.78637	4.64089	4.32707	4.33137	4.59175	-0.35345	0.0368438
POLD2	TC0700010910.hg.1	11.9301	12.1766	11.8366	11.7557	11.4261	11.5969	-0.38818	0.0494717
CTDNEP1	TC1700012345.hg.1	11.2724	11.2833	11.4598	11.1564	10.8906	10.9557	-0.337637	0.0314192
TSPO2	TC0600007985.hg.1	4.06557	3.82362	3.92897	3.58151	3.67384	3.57914	-0.32789	0.0276566
CIAPIN1	TC1600010450.hg.1	8.59538	8.46696	8.63081	8.32376	8.00988	8.25329	-0.368741	0.0409512
PSAP	TC1000010961.hg.1	14.2915	14.6078	14.5656	14.1448	14.0359	14.1185	-0.38856	0.0478751
PMS2P3	TC0700011554.hg.1	11.6166	11.9235	11.6515	11.4327	11.2978	11.3263	-0.378243	0.0439896
ZC3H4	TC1900011014.hg.1	10.5433	10.4604	10.4413	10.004	10.1895	10.2452	-0.33545	0.0294741
IRX3	TC1600010363.hg.1	11.4472	11.1316	11.2901	11.0272	10.979	10.7188	-0.38129	0.0449237
DUS2	TC1600011416.hg.1	8.90359	8.67844	9.02171	8.48506	8.60912	8.37668	-0.377624	0.0428366
TAF1L	TC0900009832.hg.1	3.57019	3.47271	3.81114	3.39418	3.14676	3.17175	-0.380446	0.0437641
SPRED2	TC0200012863.hg.1	10.3292	10.4575	10.2325	10.0213	9.92584	10.1258	-0.315414	0.0228552
GRK6	TC0500009622.hg.1	10.4907	10.696	10.4337	10.0199	10.2487	10.2782	-0.35788	0.0349484
ARL2BP	TC1600007992.hg.1	10.8932	10.7705	10.598	10.4607	10.4792	10.188	-0.377983	0.0416002
ARF1	TC0100011847.hg.1	14.2474	14.2441	14.2994	14.039	13.8203	13.9337	-0.332607	0.0268604
MRPS33	TC0700012824.hg.1	8.78437	8.89915	8.99651	8.58654	8.52648	8.63654	-0.310156	0.0205473
MCM5	TC2200007206.hg.1	12.5159	12.3912	12.429	12.2186	12.2315	12.1477	-0.24612	0.00745658
C2orf74	TC0200016455.hg.1	4.79607	4.74026	4.89882	4.54442	4.487	4.55006	-0.284556	0.0143058
CCDC130	TC1900011673.hg.1	8.90229	8.60031	8.56197	8.46829	8.14763	8.23924	-0.403136	0.0494351
TXN	TC0900011177.hg.1	14.3726	14.2491	14.214	14.0896	13.8978	13.9545	-0.297947	0.0170322
FBL	TSUnmapped00000344.hg.1	12.492	12.5188	12.6952	12.2859	12.2847	12.1845	-0.316963	0.0212998
C19orf70	TC1900009394.hg.1	9.11043	8.97887	9.10737	8.78288	8.75872	8.85883	-0.265413	0.00988516
PXDN	TC0200011503.hg.1	10.3058	10.5399	10.4232	10.0585	10.2063	9.86979	-0.378092	0.0390864
SLC52A1	TC1700009546.hg.1	6.87343	6.78639	6.79536	6.5984	6.56186	6.43302	-0.287303	0.0139609
CTNND2	TC0500010115.hg.1	3.39013	3.4893	3.34454	2.91254	3.20702	3.01328	-0.363707	0.0340997
GLUL	TC0100016625.hg.1	15.1708	15.259	15.3529	14.9516	15.0559	14.8453	-0.309983	0.0189211
SUPT20HL2	TC0X00009262.hg.1	7.85618	7.81673	7.65794	7.18854	7.46099	7.51954	-0.387258	0.0417606
GPAA1	TC0800009237.hg.1	10.6631	10.641	10.6753	10.3323	10.1925	10.4093	-0.348483	0.0290446
KCTD7	TC0700013382.hg.1	7.25612	7.16543	7.21067	7.01266	6.88741	6.83077	-0.300461	0.0164646
ARRDC5	TC1900009371.hg.1	3.38805	3.36541	3.51133	2.90806	3.22988	2.93216	-0.398231	0.0447289
METTL20	TC1200007236.hg.1	5.88462	5.96313	5.74047	5.66599	5.29905	5.43051	-0.397556	0.0444362
MRPL20	TC0100012475.hg.1	12.5723	12.5491	12.5202	12.2789	12.2111	12.0121	-0.37986	0.0377151
ASB2	TC1400010033.hg.1	4.06592	3.89441	3.85329	3.4327	3.55333	3.73439	-0.3644	0.032645
MEP1B	TC1800007037.hg.1	3.68457	3.57599	3.37575	3.01528	3.2834	3.20704	-0.376864	0.0361062
OTULIN	TC0500006822.hg.1	8.5563	8.20275	8.32616	8.03643	8.00361	7.8575	-0.395886	0.0423016
PURG	TC0800010048.hg.1	5.67959	5.96357	5.66399	5.27299	5.45785	5.42669	-0.383209	0.0380865
TMPRSS11A	TC0400010896.hg.1	2.78824	2.96109	2.85723	2.5788	2.61215	2.52746	-0.296049	0.0142279
SNX17	TC0200007064.hg.1	10.8022	10.7862	10.7165	10.5713	10.4324	10.5085	-0.2642	0.00809421
RBM46	TC0400009074.hg.1	3.01976	2.98295	3.17465	2.86645	2.61583	2.60944	-0.36188	0.0296892
PIP4K2B	TC1700010545.hg.1	7.98291	8.15906	8.38219	7.73694	7.89204	7.64245	-0.417579	0.0472531
ALKBH2	TC1200011862.hg.1	11.6785	11.4405	11.456	11.1063	11.1789	11.1895	-0.366757	0.0307182
APOPT1	TC1400010692.hg.1	10.5083	10.2403	10.5121	9.89823	10.1271	10.105	-0.37679	0.0332333
LARP4B	TC1000009527.hg.1	9.28269	9.3848	9.30418	9.01994	8.81967	9.06166	-0.356798	0.0274011
PITPNA	TC1700009378.hg.1	10.864	10.9119	11.1319	10.5974	10.5231	10.7072	-0.36003	0.0280701
HMCN1	TC0100010921.hg.1	2.93742	2.84132	2.98026	2.65698	2.5792	2.33944	-0.394462	0.0382139
CCDC124	TC1900007355.hg.1	10.541	10.8336	10.4976	10.272	10.1221	10.2444	-0.41123	0.0434481
TMEM9B	TC1100010051.hg.1	9.29956	9.28789	9.34899	8.94256	8.71052	9.03322	-0.416714	0.0447802
PHB	TC1700011045.hg.1	13.0527	13.138	13.216	12.9335	12.6609	12.6242	-0.39604	0.0376906
C10orf91	TC1000009408.hg.1	4.38691	4.47413	4.45844	3.93428	4.21999	3.97764	-0.395857	0.037629
TRPM5	TC1100009799.hg.1	2.75301	2.99299	2.81538	2.62395	2.46035	2.45333	-0.341249	0.0221946
VPS11	TSUnmapped00000294.hg.1	3.72835	3.96427	3.66451	3.38666	3.54338	3.27341	-0.384561	0.0339516
DOLK	TC0900011665.hg.1	6.03673	6.05597	6.36253	5.70832	5.63118	5.89569	-0.406677	0.0406235
PSG8	TC1900011961.hg.1	3.65801	3.59611	3.89491	3.4932	3.13066	3.28904	-0.412042	0.0423462
TSTD3	TC0600014162.hg.1	6.91874	6.78033	6.95005	6.66133	6.50346	6.35066	-0.377894	0.0318143
DHRS4L2	TC1400010580.hg.1	10.7354	10.7869	10.6795	10.4863	10.4529	10.5404	-0.24074	0.00437131
KDM1A	TC0100007303.hg.1	12.0778	12.1002	12.3839	11.8037	11.7813	11.7202	-0.418903	0.0438987
C1QTNF1	TC1700009079.hg.1	4.4174	4.35701	4.46847	4.15273	4.11954	3.92963	-0.346992	0.0229375
GPR18	TC1300009597.hg.1	4.18798	4.35608	4.03404	3.86411	3.63614	3.90173	-0.392038	0.0352784
PIK3CD-AS2	TC0100012813.hg.1	7.45273	7.36981	7.35829	6.9576	7.16722	6.86972	-0.395429	0.0354689
SLC2A2	TC0300013107.hg.1	4.33398	3.97814	4.12299	3.85802	3.60686	3.75572	-0.404836	0.0381937
SLC35E1	TC1900011901.hg.1	12.5755	12.3723	12.3799	12.0389	12.1162	12.1462	-0.342127	0.0207147
SI	TC0300013019.hg.1	3.14863	3.11163	2.84697	2.54421	2.69211	2.68513	-0.395261	0.0346972
UROC1	TC0300012282.hg.1	4.67474	4.83357	5.07213	4.46823	4.55478	4.27307	-0.428118	0.0448226
BCL7A	TC1200012224.hg.1	3.33844	3.20771	3.61392	3.13773	2.80388	2.8918	-0.442217	0.0488148
SRA1	TC0500013373.hg.1	8.69698	8.80171	8.69992	8.50206	8.43244	8.3004	-0.32124	0.01562
RNF133	TC0700012448.hg.1	3.00278	3.23968	2.98498	2.59269	2.65363	2.84847	-0.377551	0.028694
TMEM89	TC0300011030.hg.1	4.91135	4.93598	4.56766	4.39355	4.20305	4.5076	-0.43693	0.046456
PSMG4	TC0600014060.hg.1	8.85838	8.53896	8.89832	8.33052	8.43129	8.24037	-0.431157	0.0445238
GPN2	TC0100013408.hg.1	7.95141	8.01698	7.96678	7.73553	7.53207	7.64061	-0.342319	0.0195918
ORAI1	TC1200009172.hg.1	9.37947	9.68271	9.5982	9.15808	9.09043	9.22471	-0.395724	0.0332098
TMEM97	TC1700007360.hg.1	13.3897	13.43	13.4223	13.1995	13.0879	13.1291	-0.275147	0.007286
TRIM43	TC0200008481.hg.1	4.61766	4.77912	4.42073	4.00629	4.12906	4.3755	-0.435554	0.0441341
HIVEP3	TC0100013873.hg.1	6.4393	6.2962	6.10364	5.95867	5.95712	5.63692	-0.428814	0.0417834
EIF2B4	TC0200012074.hg.1	8.34191	8.12897	8.10016	7.76032	7.96975	7.69449	-0.382158	0.0278025
PPP1R42	TC0800012423.hg.1	3.23968	3.21341	3.46925	2.9105	3.03973	2.8601	-0.370672	0.0246715
ATP10B	TC0500012666.hg.1	2.99548	3.26486	3.22794	2.69399	2.78379	2.8788	-0.377231	0.0262939
ASIC1	TC1200007594.hg.1	7.39593	7.3084	7.52615	6.92851	6.8775	7.20035	-0.408038	0.0342526
ZNF530	TC1900009002.hg.1	7.20384	6.76927	6.94462	6.39979	6.69676	6.45629	-0.454959	0.0484202
DCTN5	TC1600007234.hg.1	11.8392	11.7359	11.6309	11.2642	11.5241	11.2969	-0.37365	0.0245377
NCSTN	TC0100010297.hg.1	8.8042	9.05813	9.05031	8.50248	8.64987	8.61595	-0.381446	0.0264276
MSTO1	TC0100010133.hg.1	9.69466	9.52934	9.50409	9.20842	9.26719	9.20187	-0.350204	0.0189273
PRKAG1	TC1200012789.hg.1	13.6617	13.6786	13.761	13.4118	13.4572	13.4263	-0.268647	0.00563025
LOC101928877	TC0400009514.hg.1	3.39587	3.34655	3.36682	3.11996	3.18124	3.17431	-0.211244	0.00134618
SELPLG	TC1200011845.hg.1	13.6232	13.8921	13.7687	13.3996	13.5012	13.26	-0.37441	0.0235683
SYNGR2	TC1700009040.hg.1	10.4909	10.5182	10.7406	10.3311	10.1344	10.1689	-0.371783	0.0227564
FAM47A	TC0X00009353.hg.1	3.7241	3.91534	3.76652	3.58203	3.38988	3.42332	-0.336911	0.0153221
SLC22A7	TC0600008078.hg.1	4.6023	4.63782	4.45908	4.05758	4.34735	4.12815	-0.388705	0.0266745
ZNF226	TC1900011755.hg.1	6.70358	6.65454	6.53731	6.32372	6.37788	6.27339	-0.306813	0.0101147
PIP4K2C	TC1200007890.hg.1	8.2424	8.63566	8.23544	8.0747	7.8591	7.77035	-0.469787	0.0497514
DUSP28	TC0200011361.hg.1	4.15353	4.08228	4.36355	3.84128	3.92223	3.6452	-0.396886	0.0281409
FOLR3	TC1100013069.hg.1	5.59593	5.79251	5.48786	5.39217	5.13476	5.12598	-0.407795	0.0308763
C1QTNF7	TC0400006936.hg.1	3.10481	2.83042	2.96929	2.56347	2.70479	2.51653	-0.373249	0.0223054
SIRT3	TC1100009649.hg.1	9.27031	9.15141	9.13632	8.96691	8.83504	8.76083	-0.331755	0.0138104
NDUFB4	TC0300008514.hg.1	13.2636	13.1389	12.8662	12.5355	12.697	12.6672	-0.45633	0.0442838
DUS1L	TC1700012092.hg.1	8.53422	8.56123	8.49327	8.31037	8.25319	8.33415	-0.23034	0.00204477
KATNB1	TC1600008011.hg.1	9.34087	9.28195	9.52687	8.95703	8.9957	9.07173	-0.375079	0.022151
DUSP1	TC0500012842.hg.1	10.8177	10.9614	11.0687	10.5117	10.7044	10.3159	-0.438603	0.0381897
NLRC4	TC0200012189.hg.1	3.32199	3.40047	2.97335	2.75894	2.6169	2.90475	-0.471737	0.0479647
OR10H4	TC1900007247.hg.1	3.19894	3.44597	3.09854	2.7418	2.72713	2.99096	-0.427851	0.034817
HFE2	TC0100015599.hg.1	2.95484	3.15254	2.81758	2.57159	2.69581	2.321	-0.445521	0.0395188
RCN1	TC1100012980.hg.1	2.93485	2.95212	3.1028	2.45386	2.7457	2.62389	-0.388777	0.0244066
AXIN1	TC1600008938.hg.1	7.54584	7.70344	7.51124	7.2406	7.34682	7.13214	-0.346984	0.0155399
IFI6	TC0100013445.hg.1	12.0269	12.2866	12.1308	11.7265	11.8436	11.7394	-0.378267	0.0218348
CBL	TC1100009245.hg.1	10.6424	10.7054	10.6031	10.2816	10.055	10.3517	-0.420927	0.0320711
HOMEZ	TC1400010716.hg.1	10.7857	10.9571	10.784	10.3024	10.1643	10.6096	-0.483487	0.0499154
WDR59	TC1600010864.hg.1	10.9771	10.8249	10.7404	10.5698	10.5086	10.3946	-0.35648	0.0170323
MTMR1	TC0X00008718.hg.1	10.4951	10.7355	10.6242	10.1631	10.1416	10.393	-0.385693	0.0230031
COL1A1	TC1700008240.hg.1	9.24106	9.01496	8.95639	8.83139	8.50039	8.61089	-0.423248	0.0320776
NOB1	TC1600010734.hg.1	12.9336	12.8955	13.0648	12.597	12.6033	12.5912	-0.36744	0.0185611
BPIFC	TC2200008515.hg.1	4.57747	4.70548	4.27003	4.20482	3.96615	3.95949	-0.474172	0.0454173
MINOS1	TC0100018185.hg.1	11.7099	11.6317	11.6256	11.4274	11.3106	11.2516	-0.325847	0.0110843
TRIM14	TC0900010968.hg.1	9.45939	9.25304	9.18792	8.94071	8.58189	8.97276	-0.468326	0.0431927
CKMT1B	TC1500007062.hg.1	10.5534	10.7067	10.5012	10.0956	9.93677	10.3448	-0.461354	0.0408899
HRSP12	TC0800011208.hg.1	6.63899	6.80676	6.78614	6.34081	6.44372	6.48281	-0.321518	0.0100513
CXorf65	TC0X00009980.hg.1	8.04812	8.23769	7.84891	7.52074	7.57464	7.6034	-0.478647	0.0453814
UBQLN3	TC1100009931.hg.1	3.64057	3.62899	3.35249	2.77065	3.14661	3.2205	-0.494766	0.049656
ATXN2L	TC1600007362.hg.1	16.6563	16.7905	16.4056	16.2252	16.0252	16.2559	-0.448707	0.0364787
EMG1	TC1200012591.hg.1	10.0675	9.97823	10.316	9.74804	9.598	9.70056	-0.438378	0.0336228
SAP30BP	TC1700008917.hg.1	11.583	11.5428	11.4183	11.2877	11.0661	11.1275	-0.354253	0.0149861
ARF5	TC0700013456.hg.1	13.6522	14.0055	13.6989	13.332	13.4886	13.1921	-0.448003	0.0359365
SLC15A4	TC1200012417.hg.1	11.6265	11.6879	11.6878	11.3796	11.4342	11.4657	-0.24091	0.00205157
RIF1	TC0200016545.hg.1	3.7979	3.69034	3.59641	3.2393	3.1422	3.45924	-0.414639	0.0273263
MYO7A	TC1100008525.hg.1	4.05609	4.27165	4.07638	3.86048	3.71703	3.47214	-0.45149	0.0366494
IER5	TC0100018323.hg.1	7.39707	7.14898	7.18982	6.80092	6.88552	6.83298	-0.405485	0.0251759
ZNF282	TC0700009606.hg.1	7.35491	7.04233	7.40653	6.63983	6.733	7.0154	-0.471847	0.0422372
BANP	TC1600008799.hg.1	11.6784	11.8975	11.8262	11.5316	11.3741	11.4422	-0.351413	0.014262
PFKM	TC1200007505.hg.1	9.6077	9.31231	9.68812	8.88902	9.14084	9.20109	-0.459059	0.0384074
KRTAP3-2	TC1700010645.hg.1	4.08164	4.3083	4.12687	3.55002	3.90984	3.75305	-0.434638	0.0318372
TMEM35	TC0X00007935.hg.1	3.39581	3.57671	3.17146	2.99779	2.9739	2.79002	-0.460756	0.0386904
SALL4	TC2000009462.hg.1	6.60574	6.98978	6.59542	6.10742	6.3836	6.25579	-0.481376	0.0441975
UBE2F	TC0200016607.hg.1	11.4573	11.0393	11.4272	10.8859	10.853	10.6922	-0.497573	0.0488304
GFOD2	TC1600010649.hg.1	6.8421	7.02231	6.66812	6.10351	6.48801	6.48908	-0.483978	0.0446173
RGS10	TC1000012011.hg.1	12.8994	12.829	13.0277	12.5905	12.6569	12.4514	-0.352403	0.013772
SLC2A1	TC0100013908.hg.1	11.7948	11.9212	12.0645	11.3026	11.6775	11.4641	-0.445413	0.0335942
RCN3	TC1900008544.hg.1	6.34068	6.5304	6.51318	6.06737	6.08528	6.16876	-0.354281	0.0139052
KIR3DX1	TC1900008864.hg.1	3.80125	3.72753	3.70869	3.26885	3.46565	3.42798	-0.358332	0.0144903
FOXA1	TC1400008981.hg.1	6.37769	6.43764	6.81033	6.11726	5.93741	6.05102	-0.506655	0.0499387
TAS2R42	TC1200009938.hg.1	4.00583	4.24297	3.93685	3.68343	3.54446	3.6919	-0.421953	0.0273104
RTP2	TC0300013470.hg.1	5.02785	4.66371	4.61361	4.35957	4.24584	4.19644	-0.501104	0.0480835
LRRC8A	TC0900008891.hg.1	7.53167	7.79082	7.62679	7.22341	7.20847	7.27939	-0.412667	0.0248492
RHOBTB2	TC0800007004.hg.1	4.88187	4.79104	5.02706	4.51314	4.58602	4.20281	-0.466	0.0373421
FAM83B	TC0600008319.hg.1	3.32107	3.13752	3.21967	2.77648	2.51881	2.93601	-0.482322	0.0416543
TRPV4	TC1200011882.hg.1	3.43377	3.59008	3.25116	2.72675	2.94071	3.16075	-0.482268	0.0416352
SCRN1	TC0700010619.hg.1	10.5817	10.5158	10.5694	10.3421	10.3244	10.2575	-0.24764	0.00203348
CREB3L2	TC0700012734.hg.1	7.5442	7.2808	7.41293	6.78586	7.18528	6.77072	-0.498688	0.0460386
GPR6	TC0600009107.hg.1	3.0444	3.17656	3.45358	2.62996	2.70313	2.92508	-0.472126	0.0386585
SLC9B2	TC0400012951.hg.1	7.35767	7.61103	7.41456	7.15999	6.95801	7.10646	-0.386266	0.018583
GPR157	TC0100012788.hg.1	6.87738	7.09976	6.85524	6.46746	6.40187	6.70128	-0.42059	0.0255748
NFE2L1	TC1700008151.hg.1	12.5875	13.0477	12.6999	12.2925	12.1179	12.4152	-0.50316	0.0466544
CLUH	TC1700009451.hg.1	8.63194	8.26952	8.43412	8.13669	8.02262	7.82784	-0.449478	0.03234
ATG4B	TC0200011419.hg.1	8.06156	8.27083	8.29226	7.79884	7.77417	7.77003	-0.427205	0.0269293
JTB	TC0100015894.hg.1	12.3894	12.3869	12.53	12.0534	12.2013	12.0936	-0.319357	0.00794209
GID8	TC2000008035.hg.1	10.0392	10.0069	9.94789	9.72527	9.59911	9.47715	-0.397469	0.0205258
MORN4	TC1000011555.hg.1	8.62532	8.68057	8.59588	8.24175	8.20978	8.3893	-0.353647	0.0124103
FAM71A	TC0100011534.hg.1	3.0731	3.28283	3.12556	2.69752	2.5924	2.91446	-0.425701	0.0258069
2009-03-01	TC1200007899.hg.1	9.30722	9.63038	9.62791	9.20232	8.95126	9.0616	-0.450107	0.0313631
ZNF804B	TC0700008274.hg.1	3.71194	3.28887	3.47868	3.01455	3.04756	2.91678	-0.500201	0.0442026
ORM2	TC0900012163.hg.1	2.98325	2.82035	3.07431	2.60708	2.65879	2.45977	-0.384089	0.017194
DPH2	TC0100008080.hg.1	9.79006	10.2168	9.85046	9.34284	9.32147	9.67304	-0.506652	0.0458612
RGCC	TC1300006979.hg.1	12.031	12.0531	11.9747	11.5585	11.76	11.6326	-0.369213	0.0145409
ABCC11	TC1600010216.hg.1	5.97414	6.25828	6.1481	5.6749	5.86683	5.59438	-0.414805	0.0230411
PKIG	TC2000007457.hg.1	8.87088	8.93675	8.62534	8.39605	8.24291	8.50602	-0.429329	0.0260888
ZFP64	TC2000009469.hg.1	10.558	10.4452	10.5406	10.2254	10.208	10.1796	-0.310277	0.00643198
TP53I3	TC0200011975.hg.1	9.6092	9.62548	9.55176	9.38055	9.37176	9.31924	-0.238299	0.00139711
C21orf33	TC2100007342.hg.1	11.27	11.0188	11.0476	10.7304	10.7986	10.6207	-0.395573	0.0190559
MPZL1	TC0100010514.hg.1	11.5427	11.356	11.4008	11.1438	10.9843	11.1336	-0.345943	0.0107443
TMEM265	TC1600011383.hg.1	10.5155	10.2901	10.1257	9.91488	9.60736	9.96245	-0.4822	0.0383946
LGALSL	TC0200007803.hg.1	5.30806	5.17899	5.21035	4.6602	4.95929	4.50547	-0.524145	0.0494664
CNDP2	TC1800007680.hg.1	12.5996	12.1352	12.2473	11.7927	11.8958	11.7139	-0.526587	0.0499134
ACAA1	TC0300010744.hg.1	12.2559	12.3189	12.4269	12.003	12.0547	11.9507	-0.33113	0.00846747
TANGO2	TC2200006630.hg.1	9.13326	9.38618	9.0365	8.68094	8.67751	8.78102	-0.472157	0.0351685
HUS1	TC0700011003.hg.1	9.88359	9.75415	9.66545	9.37974	9.43643	9.06033	-0.475558	0.0359432
CTRL	TC1600011552.hg.1	4.20302	4.32754	4.14761	3.87452	3.83611	3.93924	-0.342763	0.0097321
FOXK2	TC1700009260.hg.1	13.315	13.4994	13.4856	13.103	12.9694	13.1552	-0.357447	0.0117484
TMEM201	TC0100006784.hg.1	8.45984	8.2669	8.29666	8.01145	7.7844	8.03237	-0.398391	0.0185232
RNF220	TC0100008094.hg.1	13.1773	13.2694	13.1001	12.9212	12.8501	12.8003	-0.3251	0.00750043
RP11-35G9.5	TC1800009234.hg.1	8.92643	8.97775	8.66276	8.56243	8.41039	8.25669	-0.44581	0.0279982
PSKH1	TC1600008178.hg.1	8.02268	7.70984	7.77841	7.30072	7.46884	7.42878	-0.437531	0.0259343
PSME3	TC1700012262.hg.1	11.8164	11.745	11.7433	11.3287	11.4221	11.507	-0.348977	0.0102211
CCR9	TC0300007247.hg.1	11.6849	11.7714	11.948	11.4717	11.3162	11.4201	-0.39879	0.0180482
C11orf71	TC1100012375.hg.1	8.54363	8.08526	8.3898	7.64177	8.04124	7.78189	-0.517931	0.045029
ANXA13	TC0800011691.hg.1	3.4784	3.24417	3.20623	3.0236	2.74551	2.88859	-0.4237	0.0224607
PCBP3	TC2100008533.hg.1	6.29681	6.35382	6.00145	5.8	5.88206	5.50264	-0.489129	0.0370513
ERGIC1	TC0500009470.hg.1	14.1997	14.6406	14.2032	14.0307	13.6863	13.7337	-0.530933	0.047933
DSG1	TC1800007010.hg.1	6.1502	6.5057	6.33619	6.04824	5.84047	5.64861	-0.484926	0.0355106
OGDH	TC0700007392.hg.1	10.1035	10.0501	10.2401	9.80103	9.6821	9.85364	-0.352297	0.0100435
RBM15B	TC0300007438.hg.1	10.5462	10.645	10.3052	10.1615	9.70876	10.0717	-0.518183	0.043731
AP4B1	TC0100015337.hg.1	7.82444	7.88488	8.18965	7.67165	7.15333	7.4535	-0.540165	0.0495057
RNASEH1	TC0200016618.hg.1	10.2475	10.2821	9.94432	9.86998	9.66155	9.51021	-0.477368	0.033236
VASP	TC1900008329.hg.1	6.62851	7.03899	6.94404	6.38541	6.25845	6.47341	-0.498091	0.0381199
PYCR2	TC0100018564.hg.1	11.026	11.4062	11.2002	10.69	10.7419	10.6796	-0.50699	0.040349
FANCA	TC1600011292.hg.1	10.8567	10.8044	10.7937	10.532	10.1484	10.1856	-0.52961	0.0461966
PPM1M	TC0300007470.hg.1	9.19902	9.11798	9.08957	8.48315	8.60422	8.84888	-0.490106	0.0356849
KLK1	TC1900011223.hg.1	4.06994	4.16756	3.89888	3.65597	3.21282	3.65574	-0.537283	0.0478127
TGIF2	TC2000009914.hg.1	9.81665	10.0155	9.90595	9.41497	9.65603	9.32853	-0.446178	0.0256452
KIAA1324	TC0100009341.hg.1	3.61018	3.71803	3.72691	3.2741	3.44751	3.29771	-0.345268	0.00877379
ZIC2	TC1300007855.hg.1	4.41542	4.59902	4.20817	4.06121	3.77633	3.96141	-0.474552	0.0315447
C2orf76	TC0200014029.hg.1	6.4042	6.6013	6.4715	6.05958	6.23863	6.09335	-0.361814	0.0105947
FDXACB1	TC1100013227.hg.1	6.93523	6.97794	6.70644	6.53542	6.40174	6.40757	-0.42496	0.0207725
GDF11	TC1200007809.hg.1	5.37119	5.24915	5.22398	4.85975	5.02576	4.95455	-0.334753	0.00724669
WWOX	TC1600008505.hg.1	11.0303	11.1732	11.0768	10.7538	10.7211	10.7733	-0.34403	0.00827199
CCNB1IP1	TC1400008583.hg.1	12.2821	12.3149	12.1271	11.8232	11.9915	11.7954	-0.37136	0.0117324
OR10J1	TC0100010256.hg.1	3.00076	2.71154	3.0282	2.2812	2.47371	2.597	-0.462864	0.0280754
LMAN2	TC0500012965.hg.1	13.7884	13.5661	13.7117	12.9849	13.3985	13.2071	-0.49188	0.034624
KMT2D	TC1200012790.hg.1	9.76939	10.1383	10.1606	9.43587	9.42451	9.69586	-0.504037	0.0366714
REG1B	TC0200013172.hg.1	3.32877	3.22451	3.50784	2.85525	2.96378	2.92517	-0.438977	0.0224043
PSMD4	TC0100009949.hg.1	13.1432	13.464	13.2289	12.9381	12.8159	12.7414	-0.446917	0.0238384
GALNT6	TC1200010705.hg.1	7.91001	8.26752	8.14201	7.73714	7.6895	7.50497	-0.462643	0.0270026
BRD1	TC2200009121.hg.1	9.61334	9.40126	9.20685	8.72962	8.86149	9.11563	-0.504902	0.036455
TRPS1	TC0800011533.hg.1	3.88709	4.36448	4.0525	3.44833	3.6011	3.62494	-0.543234	0.0457204
TCTN3	TC1000011501.hg.1	11.2086	10.9796	11.2982	10.7479	10.3597	10.7977	-0.52701	0.0412478
EHHADH	TC0300013408.hg.1	4.55932	4.99142	4.7162	4.03629	4.05284	4.501	-0.558941	0.0494162
EHMT2	TC0600011465.hg.1	10.7755	11.2446	11.1269	10.3868	10.5581	10.5734	-0.542867	0.0451901
AGBL1	TC1500008202.hg.1	10.1686	10.0935	10.3557	9.90851	9.74139	9.74451	-0.407776	0.016194
DDR1	TC0600007552.hg.1	7.32509	7.45711	7.47951	7.0842	6.92368	7.13362	-0.373403	0.0110632
SPAG8	TC0900009956.hg.1	3.54265	3.29287	3.07975	2.80871	2.91616	2.63253	-0.519293	0.0391306
RNF216	TC0700010170.hg.1	9.58939	9.78258	9.52547	9.29719	9.28084	9.07829	-0.413704	0.0169971
SMARCA4	TC1900007005.hg.1	11.8417	12.2769	11.946	11.4409	11.4523	11.4907	-0.56027	0.0490239
NDUFS8	TC1100008175.hg.1	11.658	11.7369	11.5608	11.2398	11.4003	11.1926	-0.374337	0.0108552
DLST	TC1400007691.hg.1	9.55634	9.66082	9.81844	9.35276	9.06222	9.30244	-0.439392	0.0211573
COQ10A	TC1200007835.hg.1	10.4608	10.1513	10.5074	9.91776	9.73672	10.0209	-0.481346	0.029381
ISG15	TC0100006483.hg.1	7.63293	7.47598	7.55196	7.07848	7.29861	7.12568	-0.386031	0.0120422
IFNGR2	TC2100006967.hg.1	12.2631	12.5196	12.1383	11.8422	11.9184	11.7016	-0.486223	0.0298132
RERG	TC1200012768.hg.1	5.58345	5.64999	5.37957	4.88303	5.09046	5.23739	-0.467379	0.0255747
C7orf31	TC0700010510.hg.1	9.53358	10.0489	9.60815	9.36172	8.9983	9.11733	-0.571096	0.0495888
MTA1	TC1400010703.hg.1	11.581	11.6727	11.4301	11.2176	11.0854	11.1695	-0.40377	0.014185
BEND2	TC0X00009184.hg.1	3.75702	3.96344	3.55669	3.21181	3.18915	3.31673	-0.519818	0.0365525
ATP6V0A2	TC1200009253.hg.1	10.6232	10.652	10.5336	10.15	10.0758	10.3266	-0.418817	0.0163829
MRPL10	TC1700010960.hg.1	9.48742	9.99852	9.86203	9.36152	9.26015	9.0489	-0.559134	0.0458991
TMEM147	TC1900007864.hg.1	11.3436	11.6422	11.4607	11.1997	10.9422	10.7584	-0.515383	0.0352079
USP30	TC1200008790.hg.1	11.3968	11.2324	11.4745	11.0312	10.938	10.9085	-0.408673	0.0146856
SS18L2	TC0300007164.hg.1	9.75052	9.71149	9.61449	9.42683	9.19393	9.21154	-0.414735	0.0155776
SIAH2	TC0300012807.hg.1	12.3524	12.5765	12.1761	11.8764	11.7625	11.9673	-0.499577	0.031554
C20orf96	TC2000008121.hg.1	7.21356	7.63859	7.30743	6.83543	6.77584	6.90965	-0.54622	0.0419416
C10orf2	TC1000008665.hg.1	8.92619	8.83998	9.0511	8.60197	8.60749	8.38272	-0.408365	0.0141591
ANKRD16	TC1000009685.hg.1	7.68295	7.67451	7.43905	6.98121	7.33424	6.91809	-0.520991	0.0355232
MT1IP	TC1600007967.hg.1	5.74366	5.71012	5.75281	5.40341	5.25327	5.11788	-0.477344	0.0261689
LETM1	TC0400009754.hg.1	9.96277	9.89441	10.1969	9.51758	9.675	9.51288	-0.449554	0.0208812
GSE1	TC1600008698.hg.1	10.9888	11.3447	10.8603	10.5933	10.3154	10.6395	-0.548507	0.0419597
METTL9	TC1600007169.hg.1	12.6178	12.4449	12.4419	11.9652	11.9268	12.2346	-0.45933	0.0226625
TSPYL4	TC0600012958.hg.1	7.24673	7.06272	7.1833	6.57885	6.8701	6.74772	-0.432027	0.017738
PHKG2	TC1600011384.hg.1	8.86103	8.6737	8.58124	8.30551	7.87872	8.29977	-0.543995	0.0404518
NDRG3	TC2000009014.hg.1	13.1567	12.9972	13.0137	12.6384	12.7943	12.5735	-0.38714	0.0110028
JUNB	TC1900007096.hg.1	8.13548	8.4559	8.03213	7.84859	7.58592	7.63366	-0.518448	0.0344284
PSG3	TC1900011960.hg.1	4.94032	4.87427	4.56383	4.31578	4.21843	4.24545	-0.532922	0.0376205
SLC9A8	TC2000007658.hg.1	11.1408	11.2214	10.8566	10.7078	10.5851	10.4651	-0.486897	0.0275516
AMER1	TC0X00009877.hg.1	6.07864	5.70916	6.17464	5.27846	5.43422	5.61511	-0.544882	0.0402427
SSSCA1-AS1	TC1100011236.hg.1	5.10266	5.47267	5.39788	4.96138	4.59715	4.88502	-0.509885	0.0322611
PLA2G4D	TC1500009179.hg.1	4.8091	4.54053	4.76444	4.19463	4.42369	4.07546	-0.473429	0.0244926
SLC25A33	TC0100006781.hg.1	9.12663	8.90539	8.77226	8.58358	8.49084	8.30482	-0.475012	0.0247644
NAA10	TC0X00011415.hg.1	8.86107	8.51898	8.91429	8.42262	8.26584	7.99737	-0.536177	0.0377588
STX5	TC1100011103.hg.1	8.97526	9.02924	8.54209	8.15866	8.26465	8.38958	-0.577898	0.0477796
PSME1	TC1400006718.hg.1	12.5518	12.675	12.7552	11.8537	12.3338	12.1326	-0.55398	0.0418752
IGSF10	TC0300012818.hg.1	3.45636	3.38422	3.80763	3.03479	3.17828	2.85472	-0.526806	0.0354124
YAP1	TC1100008904.hg.1	2.78273	3.08457	2.83617	2.61423	2.31733	2.36884	-0.467688	0.023114
CRKL	TC2200006681.hg.1	13.7364	13.7163	13.6873	13.4534	13.3943	13.3438	-0.31618	0.00377818
COCH	TC1400006828.hg.1	9.04688	8.74493	8.49871	8.05072	8.06368	8.43184	-0.581427	0.0479279
USF2	TC1900007847.hg.1	10.3831	10.1086	9.85529	9.60653	9.41457	9.58538	-0.58015	0.0476055
RASSF1-AS1	TC0300007420.hg.1	5.01896	5.13056	5.25023	4.715	4.73136	4.31184	-0.547182	0.0392769
BCAT2	TC1900011098.hg.1	10.8205	10.7464	10.9854	10.3549	10.563	10.2044	-0.476647	0.0242287
GID4	TC1700007097.hg.1	10.3269	10.4038	10.0059	9.62097	9.861	9.71149	-0.514343	0.0317999
PTRHD1	TC0200011990.hg.1	9.42162	9.58655	9.63724	9.12278	9.21777	8.86786	-0.479	0.0246215
BTD	TC0300006719.hg.1	5.60764	5.25728	5.45701	4.70738	5.08643	5.00409	-0.508009	0.0303363
ERN1	TC1700011436.hg.1	9.72351	9.63804	9.79309	9.43811	9.26705	9.17579	-0.424564	0.0148819
GKN2	TC0200012948.hg.1	3.04538	3.00786	3.2835	2.55362	2.80104	2.65008	-0.443997	0.0178742
NDUFA4	TC0700010275.hg.1	13.8063	13.6742	13.5701	13.1819	13.4077	13.2194	-0.41387	0.0133299
GYS1	TC1900011113.hg.1	11.9156	11.5652	11.7538	11.273	10.9057	11.3854	-0.55682	0.0402251
CYLC2	TC0900008277.hg.1	4.28494	4.60476	4.42692	3.58765	4.04127	4.00912	-0.559527	0.0405208
ACTR1A	TC1000011683.hg.1	12.0381	12.3969	12.136	11.7514	11.3137	11.7899	-0.572003	0.0432726
CAPG	TC0200013265.hg.1	12.1318	12.3641	12.1843	11.9526	11.6248	11.5947	-0.502703	0.0280295
PEX14	TC0100006822.hg.1	9.68725	9.28669	9.32656	9.11605	8.7871	8.79494	-0.534136	0.0343109
LCE1B	TC0100018296.hg.1	4.09125	3.96699	4.10601	3.42525	3.70874	3.66003	-0.456743	0.0192898
C19orf84	TC1900011253.hg.1	10.1375	10.1704	10.3985	9.49227	9.65037	9.94722	-0.538822	0.0351354
GLI1	TC1200007882.hg.1	6.63964	6.62033	6.42967	6.08245	6.16991	6.23652	-0.400255	0.0108761
CDK15	TC0200010467.hg.1	4.36348	4.59914	4.20742	3.58365	3.93009	4.01732	-0.546328	0.0363343
ATG9A	TC0200016775.hg.1	10.8072	10.7947	11.1973	10.3893	10.2713	10.5087	-0.543307	0.0354561
LAMB3	TC0100017167.hg.1	3.18094	3.5068	3.05063	2.79678	2.80238	2.50431	-0.544967	0.0358009
ALDH1L1	TC0300012269.hg.1	4.77656	4.90002	4.59449	4.3707	4.38338	4.09254	-0.474816	0.0218546
XAGE3	TC0X00009733.hg.1	4.38826	4.80131	4.39606	3.71646	4.03389	4.14464	-0.563547	0.0397673
DVL3	TC0300009692.hg.1	11.8944	11.6142	11.8473	11.2981	11.2406	11.4737	-0.44785	0.0172688
UNC45A	TC1500008343.hg.1	8.69131	8.38383	8.63448	8.05175	7.82714	8.25662	-0.524705	0.0312557
LIG1	TC1900011060.hg.1	8.73887	8.32031	8.47263	7.86439	7.98546	8.11778	-0.521394	0.0305533
SLC25A25	TC0900008842.hg.1	4.10793	4.08806	4.07111	3.77478	3.61457	3.68478	-0.397659	0.0103073
CPA4	TC0700009134.hg.1	4.20598	4.05669	4.30977	3.89186	3.55406	3.71234	-0.471395	0.0208283
TKT	TC0300011200.hg.1	14.1629	14.6261	14.4187	13.9238	14.0075	13.5456	-0.576937	0.0419598
RPUSD1	TC1600008984.hg.1	8.78155	8.87643	9.04461	8.61789	8.37475	8.30338	-0.468854	0.0201499
PIK3C2B	TC0100017029.hg.1	8.91448	9.29675	8.94831	8.65786	8.32432	8.59379	-0.527854	0.0309341
SMG9	TC1900010863.hg.1	9.87905	9.73835	9.61399	9.13916	9.0022	9.4531	-0.545646	0.0346411
MXD4	TC0400009765.hg.1	9.07245	9.40076	8.97392	8.80864	8.58386	8.23977	-0.604957	0.04805
ARFIP2	TC1100009973.hg.1	9.30476	9.51329	9.10562	8.58136	8.48404	9.03418	-0.608031	0.0485906
SURF4	TSUnmapped00000205.hg.1	11.4597	11.4015	11.4547	10.9273	10.9792	11.1289	-0.426833	0.0133297
FBXO27	TC1900011946.hg.1	3.28621	3.06082	3.28812	2.70433	2.78668	2.82966	-0.438162	0.0148781
ZDHHC18	TC0100007484.hg.1	10.4546	10.7046	10.1477	9.90568	9.65556	9.96111	-0.594857	0.0450439
PPP1R14B	TC1100011157.hg.1	13.5091	13.871	13.5997	13.3224	13.158	12.9457	-0.51792	0.0282153
SLC37A1	TC2100008526.hg.1	5.49126	5.40801	4.95878	4.57721	4.6105	4.85105	-0.606429	0.0471448
PPP1R3B	TC0800009529.hg.1	9.44092	9.26722	9.2976	8.99897	8.92624	8.91835	-0.387392	0.008359
ATG7	TC0300006605.hg.1	7.82642	8.06713	7.99757	7.46502	7.58148	7.55359	-0.430345	0.0134377
DPPA3	TC1200006686.hg.1	4.91434	5.15974	5.28576	4.75955	4.62563	4.47443	-0.500076	0.0244632
CIZ1	TC0900011626.hg.1	12.5066	12.7656	12.403	12.1054	11.8236	12.1876	-0.51953	0.0280858
PAQR4	TC1600006647.hg.1	8.04076	8.18356	7.87015	7.72511	7.51437	7.44257	-0.470806	0.0193499
LINC00961	TC0900007106.hg.1	4.87133	5.18808	4.88137	4.43705	4.63389	4.09446	-0.591799	0.0426736
PLEKHM1	TC1700010891.hg.1	7.66904	7.49753	7.08653	6.67967	6.73814	6.96988	-0.621803	0.0496522
ACSM2B	TC1600009659.hg.1	4.65163	4.62079	4.17912	3.85629	4.09819	3.74513	-0.583974	0.0406313
HYOU1	TSUnmapped00000327.hg.1	10.9457	11.1113	10.9131	10.3892	10.6883	10.5317	-0.453627	0.01598
UQCRC1	TC0300011029.hg.1	12.86	12.9163	13.1974	12.7051	12.2676	12.317	-0.561317	0.0352046
TRIM25	TC1700011208.hg.1	11.4732	11.7597	11.6741	10.9852	10.9934	11.351	-0.525813	0.028077
PCDH10	TC0400008725.hg.1	3.48016	3.60799	3.36858	2.90563	2.94424	3.20089	-0.468662	0.0180208
IL3RA	TC0Y00006879.hg.1	4.14229	4.07055	4.33199	3.59807	3.85393	3.33395	-0.586292	0.0403333
LAPTM4B	TC0800008321.hg.1	10.1127	10.2088	9.90349	9.2523	9.37088	9.78741	-0.604806	0.0444679
ZNF672	TC0100012376.hg.1	9.48058	9.65705	9.62816	9.04025	9.03695	9.30323	-0.46179	0.0168042
MGRN1	TC1600006747.hg.1	11.1654	11.6108	11.3781	10.8763	11.0029	10.6102	-0.554937	0.0331886
TMEM248	TC0700007857.hg.1	12.5061	12.694	12.4063	12.0558	11.962	12.2185	-0.456687	0.0159359
IGSF5	TC2100007175.hg.1	3.06899	3.37386	3.11989	2.86655	2.66129	2.60224	-0.477557	0.0190445
TOB2	TC2200008827.hg.1	8.58793	8.56045	8.36459	7.78405	7.64217	8.20333	-0.627807	0.0490923
BAK1	TC0600011553.hg.1	8.5146	8.70492	8.81711	8.19094	7.81938	8.29838	-0.57598	0.0369543
PROC	TC0200009214.hg.1	4.76348	4.55218	4.39316	4.00481	3.98978	4.06253	-0.550563	0.031514
CCT6B	TC1700010408.hg.1	4.21589	4.07893	4.19916	3.68502	3.30062	3.73554	-0.590932	0.0399089
LZTR1	TC2200009196.hg.1	7.91606	7.91979	7.66795	7.16303	7.53232	6.99567	-0.604258	0.042713
SLC16A3	TC1700009236.hg.1	8.84615	8.46527	8.66191	7.90085	8.35849	8.01306	-0.566975	0.0346514
EXT2	TC1100007390.hg.1	9.34115	9.14214	8.94847	8.46567	8.70234	8.71656	-0.515733	0.0248025
SCAND2P	TC1500008156.hg.1	6.71434	6.6891	6.33811	6.04867	6.22006	5.74408	-0.576246	0.0364268
DCTD	TC0400012551.hg.1	10.6663	10.9266	10.459	10.0592	10.0486	10.134	-0.603353	0.0421851
JMJD6	TC1700011818.hg.1	7.14446	6.88543	6.81612	6.32027	6.336	6.6462	-0.514512	0.0243765
SMCR8	TC1700007116.hg.1	9.14976	8.91672	8.64117	8.38783	8.18353	8.35083	-0.595149	0.0401002
MRPL36	TC0500009881.hg.1	10.9998	11.3294	11.0102	10.6781	10.7008	10.317	-0.54788	0.0300971
SDF4	TC0100012454.hg.1	9.42743	9.59532	9.19371	9.0492	8.65944	8.88144	-0.542124	0.0288046
GCA	TC0200009829.hg.1	9.17355	9.02352	8.89499	8.6695	8.62931	8.43608	-0.452391	0.0141875
MMD	TC1700011181.hg.1	11.718	11.9016	11.7904	11.1165	11.442	11.3678	-0.49458	0.0203723
WASF1	TC0600012827.hg.1	10.7073	10.9676	10.7057	10.0978	9.9226	10.4892	-0.623684	0.045442
SDF2	TC1700010204.hg.1	7.50277	7.79583	7.88084	7.12451	7.14878	7.25751	-0.549547	0.029556
SPTAN1	TC0900012179.hg.1	10.2006	9.87491	9.69383	9.45721	9.30085	9.22063	-0.596883	0.0390267
STKLD1	TSUnmapped00000462.hg.1	5.27748	5.05118	4.81304	4.35221	4.5295	4.5365	-0.574494	0.0341856
TEX261	TC0200016686.hg.1	12.307	12.4926	12.2689	11.85	11.5374	11.985	-0.565407	0.0321628
BRD3	TC0900011872.hg.1	10.0536	10.418	10.0726	9.61181	9.58214	9.57994	-0.590078	0.0371231
KMT5C	TC1900008904.hg.1	8.16311	7.88705	7.85208	7.51561	6.99792	7.50247	-0.628748	0.0452526
PKD1	TC1600009088.hg.1	9.81633	10.1602	10.2251	9.50439	9.40015	9.63162	-0.555161	0.0299022
PCYT1A	TC0300014093.hg.1	8.8875	9.10234	8.79721	8.3675	8.03281	8.56975	-0.605665	0.0400038
TFAP4	TC1600009220.hg.1	8.65465	9.03243	8.76636	8.26612	8.23579	8.21946	-0.577354	0.0340152
PRDM15	TC2100008227.hg.1	6.61578	6.70555	6.97555	6.42733	6.08091	6.21635	-0.524094	0.0240834
ZNF625-ZNF20	TC1900011878.hg.1	5.62524	5.42837	5.58808	5.08005	5.23917	5.12326	-0.399737	0.00753252
CSNK1D	TC1700012100.hg.1	11.0022	11.093	10.9089	10.486	10.6869	10.6261	-0.401673	0.00755333
NRDE2	TC1400009957.hg.1	4.97585	5.09883	5.0831	4.60254	4.16711	4.56054	-0.609196	0.0398655
ATP5SL	TC1900010748.hg.1	12.3997	12.3535	12.1598	11.8248	11.4246	11.8867	-0.5923	0.0362277
CBX4	TC1700011953.hg.1	12.8356	12.9012	12.3873	12.0391	11.9915	12.1408	-0.650927	0.0480077
TIMM50	TC1900011730.hg.1	8.61503	8.5895	8.12719	8.00725	7.65229	7.83361	-0.612857	0.0394226
TBC1D9	TC0400011981.hg.1	4.3086	4.57331	4.04792	3.79983	3.69185	3.58536	-0.617599	0.0404053
LRCH2	TC0X00010559.hg.1	3.33359	3.26745	3.29449	2.74562	2.84177	2.34102	-0.655711	0.0486445
C7orf43	TC0700011976.hg.1	5.20617	5.62746	5.19416	4.80074	4.60589	4.84785	-0.591102	0.034587
IGF2R	TC0600010066.hg.1	8.85232	8.86828	9.35539	8.61382	8.03728	8.43936	-0.661843	0.0495263
SLC38A4	TC1200010531.hg.1	3.27265	3.26528	3.05675	2.87995	2.62046	2.74297	-0.450434	0.0120581
IGFBP6	TC1200007693.hg.1	4.06846	4.19179	4.06949	3.82388	3.67149	3.75333	-0.360345	0.00396415
WNT10A	TC0200010818.hg.1	4.50534	4.75812	4.51202	4.12697	4.03814	4.20839	-0.467328	0.0140217
HAX1	TC0100010068.hg.1	10.4254	10.4472	10.7348	10.085	9.76167	10.1342	-0.542178	0.0252362
TMEM185B	TC0200014049.hg.1	7.74299	7.99409	7.76838	7.38861	7.30933	7.32092	-0.495534	0.0178203
DHRS13	TC1700010221.hg.1	9.74551	9.37475	9.61826	9.27037	8.88809	8.87489	-0.568393	0.0296747
CCSER1	TC0400008137.hg.1	2.88554	2.90874	2.79082	2.48653	2.54699	2.35568	-0.398633	0.00660418
STRA8	TC0700009249.hg.1	4.02418	3.79847	4.21472	3.67809	3.39071	3.20485	-0.587904	0.0332439
XRCC3	TC1400010331.hg.1	9.44263	9.74398	9.62749	9.05339	8.74721	9.24087	-0.590876	0.0336712
TFEB	TC0600011798.hg.1	3.23225	3.38822	3.29617	2.89304	3.02454	2.89943	-0.366546	0.00421319
SYT13	TC1100010654.hg.1	3.9435	3.95023	3.81093	3.50173	3.6149	3.43807	-0.383317	0.00533888
YPEL4	TC1100010903.hg.1	4.10496	4.12788	4.30906	3.47534	3.62714	3.85437	-0.528349	0.0221752
AAED1	TC0900010920.hg.1	8.81447	8.48366	8.68515	7.95662	8.09068	8.33543	-0.533519	0.0228518
SLC25A48	TC0500008730.hg.1	4.26963	4.4304	3.83259	3.55131	3.35651	3.63464	-0.663385	0.0476496
ZNF280D	TC1500010872.hg.1	5.72849	5.7301	5.75597	5.22233	5.32758	5.37664	-0.429338	0.00902609
LRRC46	TC1700008138.hg.1	5.73233	5.62734	5.72681	5.02893	4.77955	5.31329	-0.654905	0.0455004
VARS2	TC0600014100.hg.1	6.77451	6.74864	6.99636	6.29623	6.38297	6.45577	-0.461516	0.0124
METTL11B	TC0100010559.hg.1	3.62184	3.98165	4.09274	3.47134	3.36766	3.04528	-0.603982	0.0348528
BSCL2	TC1100013174.hg.1	11.721	11.6901	11.6949	11.2337	10.7748	11.152	-0.648503	0.043792
CASP2	TC0700009488.hg.1	13.7881	14.094	13.7657	13.3819	13.243	13.4555	-0.522487	0.0204637
TMEM106A	TC1700007944.hg.1	10.2001	9.83571	9.73698	9.56088	8.97774	9.28816	-0.648675	0.0434318
CHRM3	TC0100018366.hg.1	3.74542	3.39386	3.81329	3.13551	2.67643	3.2141	-0.642175	0.0420558
DMWD	TC1900011985.hg.1	9.66043	9.8032	9.47972	9.16909	9.05637	9.15217	-0.521907	0.0202156
SLC1A5	TC1900011004.hg.1	12.526	12.599	12.8146	12.1697	11.9356	12.2842	-0.516687	0.0193028
NINJ2	TC1200009558.hg.1	12.9769	13.5521	13.3133	12.9394	12.3801	12.5097	-0.671007	0.0475903
GPR146	TC0700006484.hg.1	11.9847	12.2374	12.0504	11.7379	11.5247	11.6546	-0.451727	0.010843
DKK4	TC0800010282.hg.1	4.02964	4.49293	3.89762	3.68535	3.4681	3.28109	-0.661885	0.0454706
SNAI1	TC2000007670.hg.1	6.38527	6.21358	6.20193	5.7304	5.31254	5.82587	-0.643987	0.0415754
SGMS2	TC0400008345.hg.1	3.1649	2.99248	2.72759	2.35728	2.5908	2.03191	-0.63499	0.0396516
TRAPPC2L	TC1600008851.hg.1	8.28989	8.63712	8.62259	8.18244	7.67492	7.86816	-0.608026	0.0340972
TEX35	TC0100018321.hg.1	4.50071	4.62025	4.3348	3.94428	4.02724	3.95275	-0.510498	0.0177893
UGGT2	TC1300009522.hg.1	3.19305	3.08264	3.2673	2.77505	2.8109	2.54961	-0.469142	0.0124158
RNF10	TC1200009132.hg.1	10.3222	10.6329	10.3658	9.88813	9.91906	9.84448	-0.556414	0.0246107
[truncated: 575 more rows]
